# Supplementary material for: Novel EDGE encoding method enhances ability to identify genetic interactions
Source: PLoS Genet. 2021 Jun 4;17(6):e1009534. doi: 10.1371/journal.pgen.1009534 (PMC8208534; doi:10.1371/journal.pgen.1009534)
Supplement: S6 Table — Results from SNP-SNP interactions for T2D in eMERGE with additive (A), dominant (B), recessive (C), codominant (D), and EDGE (E) encodings. Var1_ID (SNP 1 rs#), Var1_Pos (SNP 1 chromosome:base pair), Var1_MAF (SNP 1 minor allele frequency), Var1_ID (SNP’s rs#), Var2_Pos (SNP 2 chromosome:base pair), Var2_MAF (SNP 2 minor allele frequency), Num_nonMissing (sample size), Num_Cases (number of cases), N_Iter (number of iterations), Converged (model convergence; yes:1, no:0), Raw_LRT_pval (unadjusted likelihood ratio test p-value), Red_Var1_Pval (SNP 1 p-value in reduced model), Red_Var1_beta (SNP 1 beta value in reduced model), Red_Var1_SE (SNP 1 standard error in reduced model), Red_Var2_Pval (SNP 2 p-value in reduced model), Red_Var2_beta (SNP 2 beta value in reduced model), Red_Var2_SE (SNP 2 standard error in reduced model), Full_Var1_Pval (SNP 1 p-value in full model), Full_Var1_beta (SNP 1 beta value in full model), Full_Var1_SE (SNP 1 standard error in full model), Full_Var2_Pval (SNP 2 p-value in full model), Full_Var2_beta (SNP 2 beta value in full model), Full_Var2_SE (SNP 2 standard error in full model), Full_Var1_Var2_Pval (p-value of interaction between SNP1 and SNP2 in full model), Full_Var1_Var2_beta (beta value of interaction between SNP1 and SNP2 in full model), Full_Var1_Var2_SE (standard error of interaction between SNP1 and SNP2 in full model), Red_model_Pval (reduced model p-value), Full_model_Pval (full model p-value), Overall_LRT_Pval (Likelihood ratio test p-value), Overall_Pval_adj_Bonferroni (Bonferroni adjusted LRT p-value), Overall_Pval_adj_FDR (FDR adjusted LRT p-value). (XLSX) [file pgen.1009534.s009.xlsx]

## Sheet: A) Additive
Var1_ID	Var1_Pos	Var1_MAF	Var2_ID	Var2_Pos	Var2_MAF	Num_NonMissing	Num_Cases	N_Iter	Converged	Raw_LRT_pval	Red_Var1_Pval	Red_Var1_beta	Red_Var1_SE	Red_Var2_Pval	Red_Var2_beta	Red_Var2_SE	Full_Var1_Pval	Full_Var1_beta	Full_Var1_SE	Full_Var2_Pval	Full_Var2_beta	Full_Var2_SE	Full_Var1_Var2_Pval	Full_Var1_Var2_beta	Full_Var1_Var2_SE	Red_Model_Pval	Full_Model_Pval	Overall_Pval_(LRT)	Overall_Pval_adj_Bonferroni	Overall_Pval_adj_FDR
rs3821757	3:10948564	G:0.484774	rs11228658	11:56335596	T:0.169103	17995	6648	5	1	0.000392743	3.20491e-06	-0.148858	0.0319627	4.90441e-05	-0.136958	0.0337325	1.59275e-08	-0.195749	0.0346381	9.81693e-08	-0.266605	0.050019	0.000392368	0.132782	0.0374545	3.98075e-09	4.32743e-11	0.000392743	1	0.140732
rs3821757	3:10948564	G:0.484747	rs12288760	11:56333753	C:0.169084	17997	6649	5	1	0.000393565	3.41132e-06	-0.148424	0.0319579	4.784e-05	-0.137151	0.0337317	1.70908e-08	-0.195298	0.0346326	9.63472e-08	-0.266774	0.0500187	0.000393391	0.132759	0.0374552	4.12318e-09	4.4879e-11	0.000393565	1	0.140732
rs3821757	3:10948564	G:0.484819	rs7483053	11:56340724	T:0.16916	17983	6643	5	1	0.000413384	3.85545e-06	-0.147696	0.0319756	4.68025e-05	-0.13737	0.0337432	2.01168e-08	-0.19444	0.0346534	9.95531e-08	-0.266549	0.0500322	0.000413235	0.132288	0.0374596	4.55949e-09	5.18155e-11	0.000413384	1	0.140732
rs12288760	11:56333753	C:0.169192	rs1729752	13:95732362	G:0.297794	18083	6705	5	1	0.00046868	3.12445e-05	-0.140132	0.0336515	6.05964e-08	-0.168351	0.031078	6.45221e-08	-0.232974	0.0430972	1.69909e-10	-0.220624	0.0345463	0.000468707	0.142645	0.0407785	5.95655e-11	8.19615e-13	0.00046868	1	0.140732
rs11228658	11:56335596	T:0.169211	rs1729752	13:95732362	G:0.297771	18081	6704	5	1	0.000482117	3.20537e-05	-0.139937	0.0336519	6.71622e-08	-0.167797	0.0310816	6.78713e-08	-0.232583	0.0430972	1.93177e-10	-0.219979	0.0345516	0.000481963	0.142342	0.0407789	6.74965e-11	9.51201e-13	0.000482117	1	0.140732
rs7483053	11:56340724	T:0.169268	rs1729752	13:95732362	G:0.297665	18069	6699	5	1	0.000496462	3.05391e-05	-0.140355	0.0336631	6.91029e-08	-0.167689	0.031091	6.6462e-08	-0.232792	0.0431058	2.03451e-10	-0.21977	0.034562	0.000496457	0.142034	0.0407831	6.6515e-11	9.63153e-13	0.000496462	1	0.140732
rs3739480	9:19516280	G:0.502457	rs7483053	11:56340724	T:0.16823	17910	6649	5	1	0.000820906	2.44357e-06	-0.185561	0.039374	3.85952e-05	-0.139404	0.033871	4.16483e-08	-0.226411	0.0412878	1.67103e-07	-0.258907	0.0494793	0.000824222	0.117205	0.0350437	2.33104e-09	5.02029e-11	0.000820906	1	0.140732
rs3739480	9:19516280	G:0.502427	rs11228658	11:56335596	T:0.168173	17922	6654	5	1	0.000901569	2.59577e-06	-0.185034	0.0393651	4.03549e-05	-0.139009	0.0338597	4.65614e-08	-0.225528	0.0412754	1.91916e-07	-0.25752	0.0494564	0.000905507	0.116248	0.035032	2.58527e-09	6.0515e-11	0.000901569	1	0.140732
rs3739480	9:19516280	G:0.502483	rs12288760	11:56333753	C:0.168154	17924	6655	5	1	0.000908243	3.02846e-06	-0.183679	0.0393412	3.90361e-05	-0.139265	0.0338588	5.53157e-08	-0.224125	0.0412502	1.87972e-07	-0.257722	0.0494587	0.000911622	0.116182	0.0350319	2.92663e-09	6.88034e-11	0.000908243	1	0.140732
rs12265291	10:114810240	T:0.449331	rs4148427	13:95925674	T:0.251576	18088	6707	5	1	0.00100711	8.6185e-09	-0.148368	0.0257767	8.10299e-06	-0.156536	0.0350785	0.000958516	-0.0986465	0.0298709	0.089304	-0.0734318	0.0432185	0.00102663	-0.0995158	0.0303113	2.53165e-12	7.36984e-14	0.00100711	1	0.140732
rs2308953	5:34909062	C:0.084391	rs117537110	6:30649931	G:0.449009	17964	6661	5	1	0.00107634	3.31856e-05	0.586112	0.141217	0.010801	0.351981	0.138082	0.893311	0.0303004	0.225927	0.225515	0.179274	0.147916	0.00121206	0.468405	0.144747	8.50036e-10	2.38642e-11	0.00107634	1	0.140732
rs7708975	5:132650567	T:0.0961762	rs849142	7:28185891	C:0.413162	18097	6710	5	1	0.00143508	0.000218227	-0.158497	0.0428726	5.84487e-06	-0.117332	0.0258901	1.21782e-06	-0.292388	0.0602524	7.75624e-08	-0.149389	0.0278052	0.0014075	0.189852	0.0594567	3.74012e-08	1.26347e-09	0.00143508	1	0.140732
rs74987670	10:112820864	G:0.0596588	rs12265291	10:114810240	T:0.450039	17994	6669	5	1	0.00145962	1.6426e-05	-0.231028	0.0536196	1.86552e-08	-0.145307	0.0258369	2.84273e-07	-0.441264	0.0859564	3.13662e-10	-0.169713	0.0269734	0.00145039	0.23446	0.0736269	7.92084e-12	3.17491e-13	0.00145962	1	0.140732
rs11196191	10:114780633	A:0.449419	rs4148427	13:95925674	T:0.252326	18060	6706	5	1	0.00147361	6.4306e-08	-0.13909	0.025727	7.76164e-06	-0.157059	0.0351233	0.00234732	-0.0908367	0.0298573	0.0770009	-0.0765428	0.0432846	0.00149816	-0.0958467	0.0301876	1.59849e-11	6.3907e-13	0.00147361	1	0.140732
rs11196208	10:114811316	T:0.456781	rs4148427	13:95925674	T:0.252147	17932	6650	5	1	0.00148458	2.29522e-08	-0.143789	0.0257311	7.43647e-06	-0.158325	0.0353341	0.0014311	-0.0953274	0.0298991	0.0832814	-0.075888	0.0438163	0.00150844	-0.096571	0.0304347	6.13871e-12	2.50877e-13	0.00148458	1	0.140732
rs12258200	10:114781698	T:0.449524	rs4148427	13:95925674	T:0.252354	18058	6705	5	1	0.00148458	6.52872e-08	-0.139026	0.025728	8.33357e-06	-0.156513	0.0351208	0.00235908	-0.0907973	0.0298592	0.0789282	-0.0760456	0.043283	0.00150862	-0.095785	0.0301873	1.73176e-11	6.96118e-13	0.00148458	1	0.140732
rs6585200	10:114768609	A:0.453646	rs4148427	13:95925674	T:0.252378	17981	6675	5	1	0.00152931	9.53856e-09	-0.148163	0.0258181	7.89674e-06	-0.15735	0.0352174	0.000845084	-0.0999689	0.0299524	0.0783958	-0.0765149	0.0434727	0.00155426	-0.0957532	0.0302599	2.58411e-12	1.09953e-13	0.00152931	1	0.140732
chr10:114772253:i	10:114772253	C:0.449087	rs4148427	13:95925674	T:0.251568	18011	6679	5	1	0.0016754	1.2573e-07	-0.136203	0.0257717	6.27409e-06	-0.158842	0.0351658	0.00303699	-0.0885803	0.0298857	0.0674433	-0.0792303	0.0433258	0.00170134	-0.095011	0.0302781	2.56939e-11	1.14493e-12	0.0016754	1	0.140732
rs12718338	10:114813047	C:0.457383	rs4148427	13:95925674	T:0.252467	17939	6653	5	1	0.00169508	2.05645e-08	-0.144206	0.025718	7.82816e-06	-0.157942	0.035335	0.00128333	-0.096266	0.0298992	0.0810014	-0.0764712	0.0438254	0.00172219	-0.0953086	0.0304075	5.76116e-12	2.65771e-13	0.00169508	1	0.140732
rs7904519	10:114773927	A:0.450141	rs4148427	13:95925674	T:0.25129	18021	6684	5	1	0.00182591	8.4826e-08	-0.137838	0.0257326	5.53268e-06	-0.159729	0.0351555	0.00239473	-0.0906268	0.0298474	0.0633617	-0.0805102	0.0433633	0.00185312	-0.094135	0.0302411	1.54026e-11	7.48126e-13	0.00182591	1	0.140732
rs6585199	10:114765171	G:0.456452	rs4148427	13:95925674	T:0.252548	17957	6665	5	1	0.00192355	1.37886e-08	-0.146064	0.0257336	5.24877e-06	-0.160716	0.0352866	0.000958768	-0.098752	0.0299035	0.0640634	-0.0808593	0.0436667	0.00195282	-0.0938274	0.0302931	2.51195e-12	1.31614e-13	0.00192355	1	0.140732
rs7918599	10:114777396	C:0.449573	rs4148427	13:95925674	T:0.251773	18046	6696	5	1	0.0019297	9.69827e-08	-0.137144	0.0257195	9.8163e-06	-0.155143	0.0350908	0.00254702	-0.0900842	0.0298519	0.075946	-0.0767341	0.0432376	0.00195796	-0.0933411	0.0301437	3.0572e-11	1.54345e-12	0.0019297	1	0.140732
rs10746051	12:106256437	C:0.327067	rs10861525	12:106260341	C:0.318787	17874	6625	5	1	0.00208557	0.407004	0.0758522	0.0914789	0.630022	0.0442273	0.0918159	0.114453	0.149185	0.094511	0.0886111	0.171483	0.100708	0.00211274	-0.121481	0.0395201	4.09354e-05	1.61162e-06	0.00208557	1	0.140732
rs599136	10:112823415	A:0.0600267	rs12265291	10:114810240	T:0.450256	17992	6669	5	1	0.00215098	1.90279e-05	-0.228497	0.0534372	1.68716e-08	-0.14573	0.0258324	4.82078e-07	-0.428904	0.0852131	3.44003e-10	-0.169333	0.0269744	0.00213568	0.224816	0.0732136	8.43993e-12	4.79952e-13	0.00215098	1	0.140732
rs74987670	10:112820864	G:0.0594699	rs10885409	10:114808072	T:0.456942	17883	6632	5	1	0.00220904	3.53757e-05	-0.222871	0.0538886	8.39069e-08	-0.137933	0.0257408	8.74924e-07	-0.431386	0.0877181	1.84769e-09	-0.161767	0.0269133	0.00220099	0.227143	0.0741889	7.22719e-11	4.06217e-12	0.00220904	1	0.140732
rs10787473	10:114781400	C:0.452319	rs4148427	13:95925674	T:0.252452	18047	6700	5	1	0.00221612	1.58205e-07	-0.134343	0.0256246	7.91632e-06	-0.15692	0.0351252	0.00317663	-0.0878542	0.02978	0.0694381	-0.0788065	0.0434062	0.00224646	-0.0922356	0.0301862	3.99904e-11	2.27708e-12	0.00221612	1	0.140732
rs10885409	10:114808072	T:0.456331	rs4148427	13:95925674	T:0.252698	17976	6671	5	1	0.00223033	3.93093e-08	-0.1411	0.0256829	5.29453e-06	-0.160588	0.0352726	0.00155678	-0.0944682	0.0298583	0.0617554	-0.0816256	0.0436957	0.00226206	-0.0926456	0.030341	7.52865e-12	4.43159e-13	0.00223033	1	0.140732
rs117537110	6:30649931	G:0.447412	rs4148427	13:95925674	T:0.252002	18103	6712	5	1	0.00223509	6.33747e-07	0.613653	0.123208	7.239e-06	-0.157263	0.0350521	4.00392e-06	0.572158	0.124081	6.87058e-08	-0.236997	0.0439329	0.00223879	0.109358	0.035778	1.44574e-10	8.11356e-12	0.00223509	1	0.140732
rs6436602	2:227005350	G:0.364904	rs10885406	10:114777724	A:0.452076	18039	6686	5	1	0.00237513	3.23088e-05	0.110062	0.0264791	1.72984e-07	-0.133941	0.0256286	7.04796e-07	0.212007	0.042743	0.16803	-0.0514302	0.0373072	0.00239215	-0.103636	0.0341282	1.96455e-10	1.15814e-11	0.00237513	1	0.140732
rs74987670	10:112820864	G:0.0594932	rs11196205	10:114807047	G:0.457093	17876	6630	5	1	0.00238784	3.47953e-05	-0.223061	0.053885	1.12769e-07	-0.136529	0.0257366	9.51039e-07	-0.430178	0.0877644	2.64628e-09	-0.160147	0.0269058	0.00237945	0.22561	0.0742562	9.55579e-11	5.73292e-12	0.00238784	1	0.140732
rs10885406	10:114777724	A:0.452134	rs4148427	13:95925674	T:0.251718	18040	6689	5	1	0.0024083	1.83719e-07	-0.133679	0.0256331	1.07334e-05	-0.154573	0.0351154	0.00323407	-0.087666	0.0297721	0.0757299	-0.0770837	0.0434025	0.00244267	-0.09157	0.0302176	6.27909e-11	3.82383e-12	0.0024083	1	0.140732
rs10787472	10:114781297	A:0.452229	rs4148427	13:95925674	T:0.252728	18055	6705	5	1	0.00244194	1.71686e-07	-0.13393	0.0256196	6.82307e-06	-0.157978	0.0351129	0.00317336	-0.0878633	0.0297799	0.0629129	-0.0806838	0.0433829	0.0024759	-0.0912935	0.030167	3.76409e-11	2.34137e-12	0.00244194	1	0.140732
rs4646591	15:58303002	G:0.47509	rs4646362	17:17468641	C:0.496627	18085	6711	5	1	0.0026007	0.00735802	0.121907	0.0454844	0.0058082	-0.118306	0.042889	8.369e-05	0.226203	0.0575057	0.671809	-0.0227125	0.0536094	0.00268099	-0.124893	0.0416015	1.60728e-07	8.95777e-09	0.0026007	1	0.140732
rs12255372	10:114808902	T:0.28486	rs8011527	14:68638685	A:0.320398	18051	6689	5	1	0.00267681	1.98044e-16	0.221885	0.0269826	0.000157065	0.115481	0.0305536	3.00278e-16	0.292506	0.0357884	1.44013e-06	0.179867	0.0373217	0.00267719	-0.109829	0.0365785	2.43249e-18	2.05329e-19	0.00267681	1	0.140732
rs12255372	10:114808902	T:0.28493	rs6573817	14:68617269	G:0.319125	18029	6689	5	1	0.00269403	2.78335e-16	0.221021	0.0270119	0.000105567	0.118412	0.0305388	3.82307e-16	0.291545	0.0357986	9.65826e-07	0.182907	0.0373397	0.00269419	-0.110245	0.0367406	2.35075e-18	1.99657e-19	0.00269403	1	0.140732
rs6436602	2:227005350	G:0.364845	rs10787473	10:114781400	C:0.452261	18046	6697	5	1	0.00270268	3.43594e-05	0.109636	0.0264663	1.47035e-07	-0.134663	0.0256196	8.62342e-07	0.210215	0.0427205	0.152766	-0.0533024	0.0372788	0.00272021	-0.102275	0.0341178	1.78177e-10	1.1817e-11	0.00270268	1	0.140732
rs6436602	2:227005350	G:0.36485	rs10787472	10:114781297	A:0.452171	18054	6702	5	1	0.00273172	3.40585e-05	0.109678	0.0264636	1.5947e-07	-0.134252	0.0256145	8.68169e-07	0.210107	0.0427101	0.154865	-0.0530162	0.0372683	0.00275134	-0.102141	0.0341125	1.92092e-10	1.28453e-11	0.00273172	1	0.140732
rs74987670	10:112820864	G:0.0595258	rs11196208	10:114811316	T:0.457401	17841	6612	5	1	0.00281173	5.05472e-05	-0.218659	0.0539488	5.68386e-08	-0.13997	0.0257845	1.51421e-06	-0.42327	0.0880098	1.38576e-09	-0.163311	0.0269617	0.0028004	0.222303	0.0743778	6.90297e-11	4.8235e-12	0.00281173	1	0.140732
rs2972152	2:227066574	A:0.280527	rs599136	10:112823415	A:0.060159	17861	6630	5	1	0.00283892	5.3135e-07	-0.13979	0.0278764	3.21101e-05	-0.222428	0.0534946	1.19506e-08	-0.168034	0.0294774	4.04166e-07	-0.355623	0.0701844	0.00270448	0.24271	0.0809177	4.68061e-10	3.18761e-11	0.00283892	1	0.140732
rs74987670	10:112820864	G:0.0595552	rs12718338	10:114813047	C:0.457981	17849	6616	5	1	0.00286332	5.22018e-05	-0.218164	0.0539271	4.8506e-08	-0.140645	0.0257747	1.58996e-06	-0.42256	0.0880409	1.18365e-09	-0.163931	0.0269515	0.00285422	0.221952	0.0744052	6.15764e-11	4.38213e-12	0.00286332	1	0.140732
rs6436602	2:227005350	G:0.36513	rs10885405	10:114777670	C:0.46141	18010	6677	5	1	0.00286945	3.0645e-05	0.11041	0.0264859	1.56978e-07	-0.133167	0.0253933	8.80523e-07	0.211314	0.0429795	0.148065	-0.0533337	0.0368735	0.00288791	-0.101532	0.0340777	1.76618e-10	1.23619e-11	0.00286945	1	0.140732
rs1522812	2:226997454	A:0.360136	rs2856608	16:19505751	G:0.335116	17946	6627	5	1	0.00299494	4.69471e-05	0.108513	0.0266596	2.30982e-05	-0.114117	0.0269613	0.181049	0.0455894	0.0340847	3.2975e-07	-0.190034	0.0372206	0.00299273	0.108348	0.0364994	2.97316e-08	1.9532e-09	0.00299494	1	0.140732
rs1522812	2:226997454	A:0.359865	rs2521793	16:19511391	C:0.341173	17815	6582	5	1	0.00300136	7.60246e-05	0.105895	0.0267643	2.41807e-05	-0.11421	0.0270493	0.222875	0.0419214	0.0343923	3.43684e-07	-0.19036	0.0373418	0.00300139	0.108421	0.0365349	4.84481e-08	3.15439e-09	0.00300136	1	0.140732
rs599136	10:112823415	A:0.0598647	rs10885409	10:114808072	T:0.457164	17882	6633	5	1	0.00302718	4.36454e-05	-0.219424	0.0536846	8.29814e-08	-0.137949	0.0257342	1.42896e-06	-0.419075	0.0869284	2.13977e-09	-0.161141	0.026916	0.00301447	0.218628	0.0737049	8.89828e-11	6.614e-12	0.00302718	1	0.140732
rs2972152	2:227066574	A:0.28054	rs74987670	10:112820864	G:0.0597637	17862	6629	5	1	0.00303692	6.00591e-07	-0.139104	0.0278707	2.64915e-05	-0.225596	0.0536917	1.4214e-08	-0.167087	0.0294646	3.65981e-07	-0.358707	0.0705304	0.00289581	0.24146	0.0810652	4.27008e-10	3.09429e-11	0.00303692	1	0.140732
rs6436602	2:227005350	G:0.364864	rs6585201	10:114768783	G:0.466515	17993	6670	5	1	0.00304017	4.34282e-05	0.108479	0.0265331	1.4507e-08	-0.144222	0.0254482	1.2614e-06	0.210066	0.0433507	0.0794707	-0.0647713	0.0369327	0.00305934	-0.101152	0.0341532	2.2258e-11	1.70065e-12	0.00304017	1	0.140732
rs7708975	5:132650567	T:0.095895	rs8011527	14:68638685	A:0.320398	18051	6689	5	1	0.00306961	0.000262154	-0.156847	0.0429708	0.000239388	0.112055	0.0305048	0.677749	-0.0255095	0.0613894	8.59412e-06	0.143913	0.0323413	0.00307704	-0.155775	0.052628	1.37498e-06	8.41734e-08	0.00306961	1	0.140732
rs7708975	5:132650567	T:0.095901	rs6573817	14:68617269	G:0.319125	18029	6689	5	1	0.00307949	0.000309221	-0.155121	0.0430002	0.000169232	0.114669	0.0304888	0.69223	-0.0242675	0.0613078	5.79145e-06	0.146617	0.0323383	0.00308424	-0.15633	0.0528283	1.11241e-06	6.86764e-08	0.00307949	1	0.140732
rs62026181	16:19506239	T:0.335778	rs2856611	16:19507199	G:0.3386	18070	6703	5	1	0.00308279	0.839286	0.0458566	0.22611	0.487071	-0.157178	0.226164	0.388825	0.199939	0.232015	0.606294	-0.116772	0.226578	0.00310111	-0.114632	0.0387593	0.000164452	8.72943e-06	0.00308279	1	0.140732
rs17866193	4:118392862	C:0.44231	rs117537110	6:30649931	G:0.446252	18010	6670	5	1	0.00309271	3.72217e-06	0.117717	0.0254451	8.11346e-07	0.60863	0.123389	0.0772851	0.0575245	0.0325611	2.31891e-05	0.533558	0.126085	0.00309712	0.0765925	0.0258939	1.06707e-10	8.05926e-12	0.00309271	1	0.140732
rs6436602	2:227005350	G:0.364932	rs6585202	10:114782803	T:0.461671	18028	6696	5	1	0.00309271	3.77286e-05	0.109071	0.0264673	1.35089e-07	-0.133741	0.0253692	1.11773e-06	0.209056	0.04293	0.137046	-0.0547278	0.0368071	0.00311154	-0.100651	0.0340439	1.85094e-10	1.3843e-11	0.00309271	1	0.140732
rs11196205	10:114807047	G:0.456481	rs4148427	13:95925674	T:0.252685	17969	6669	5	1	0.00315292	5.39067e-08	-0.139637	0.0256785	5.42089e-06	-0.160431	0.0352766	0.00153409	-0.0945932	0.0298575	0.0543934	-0.0840966	0.0437163	0.00319099	-0.0894359	0.0303305	1.04118e-11	8.32309e-13	0.00315292	1	0.140732
rs599136	10:112823415	A:0.0598881	rs11196205	10:114807047	G:0.457315	17875	6631	5	1	0.00326641	4.29315e-05	-0.219615	0.0536811	1.11516e-07	-0.136546	0.0257301	1.55074e-06	-0.417867	0.0869725	3.0599e-09	-0.159523	0.0269085	0.00325323	0.217087	0.0737704	1.17768e-10	9.32437e-12	0.00326641	1	0.140732
rs7708975	5:132650567	T:0.0962171	rs1555944	14:68625118	G:0.322414	17949	6673	5	1	0.00333006	0.000268999	-0.156691	0.0430061	0.000210028	0.112787	0.0304284	0.676672	-0.0256937	0.0616143	7.63471e-06	0.144452	0.0322786	0.00333441	-0.155291	0.0529081	1.21579e-06	8.02658e-08	0.00333006	1	0.140732
rs1522812	2:226997454	A:0.360494	rs2074172	16:19529042	A:0.339942	17906	6614	5	1	0.00342055	4.53452e-05	0.108764	0.0266682	2.64469e-05	-0.113596	0.0270332	0.175532	0.0463007	0.0341793	4.27029e-07	-0.188465	0.0372718	0.00342101	0.106679	0.0364449	3.22419e-08	2.38011e-09	0.00342055	1	0.140732
rs117537110	6:30649931	G:0.447399	rs12255372	10:114808902	T:0.284874	18108	6713	5	1	0.00345745	7.35121e-07	0.610458	0.123279	5.03868e-16	0.21858	0.0269501	1.2366e-07	0.656694	0.124186	1.01928e-15	0.287539	0.0358325	0.00347538	-0.0797479	0.0272901	1.98669e-20	2.22052e-21	0.00345745	1	0.140732
rs1522812	2:226997454	A:0.360317	rs2856611	16:19507199	G:0.338462	17937	6627	5	1	0.00345745	4.04273e-05	0.109422	0.0266555	2.75563e-05	-0.113175	0.0269928	0.166254	0.0472394	0.0341241	4.47382e-07	-0.187846	0.0372148	0.00345533	0.106486	0.0364175	3.02589e-08	2.25834e-09	0.00345745	1	0.140732
rs6436602	2:227005350	G:0.364643	rs12255372	10:114808902	T:0.284902	18115	6716	5	1	0.003491	3.5183e-05	0.109583	0.0264884	4.16732e-16	0.219136	0.0269421	0.174113	0.0465021	0.0342152	0.000356289	0.13811	0.0386807	0.0035076	0.109097	0.0373704	8.21974e-19	8.92023e-20	0.003491	1	0.140732
rs2943645	2:227099180	C:0.356198	rs1562692	3:34534267	G:0.121325	18063	6701	5	1	0.0034985	2.52778e-08	-0.142846	0.0256395	6.83921e-05	0.218841	0.0549601	3.82488e-10	-0.174833	0.0279241	0.0456392	0.12675	0.0634156	0.00353818	0.126584	0.0434004	7.52978e-11	6.38945e-12	0.0034985	1	0.140732
rs7899529	10:114779538	G:0.452524	rs4148427	13:95925674	T:0.251913	18030	6687	5	1	0.00354765	3.09095e-07	-0.131271	0.0256498	9.84783e-06	-0.155227	0.0351154	0.00349803	-0.0870095	0.0297957	0.0632967	-0.080648	0.0434268	0.0035919	-0.0879687	0.0302097	9.40764e-11	8.05153e-12	0.00354765	1	0.140732
rs6436602	2:227005350	G:0.364634	rs6585199	10:114765171	G:0.456391	17955	6662	5	1	0.00360525	4.00906e-05	0.109078	0.0265592	1.39207e-08	-0.145986	0.0257273	1.42188e-06	0.207988	0.043134	0.0738083	-0.0668598	0.0373978	0.00362878	-0.0997013	0.0342764	1.93381e-11	1.72532e-12	0.00360525	1	0.140732
rs2856608	16:19505751	G:0.335158	rs62026181	16:19506239	T:0.335739	18081	6704	5	1	0.00360912	0.369532	-0.142198	0.158464	0.848623	0.030266	0.158564	0.808565	-0.0392881	0.162162	0.464622	0.117894	0.161222	0.00362947	-0.11259	0.0387083	0.000143718	8.80374e-06	0.00360912	1	0.140732
rs6436602	2:227005350	G:0.365019	chr10:114772253:i	10:114772253	C:0.449028	18010	6676	5	1	0.00369144	4.4669e-05	0.108223	0.0265129	1.15508e-07	-0.13657	0.0257657	1.52622e-06	0.205691	0.042783	0.130367	-0.0568979	0.0376145	0.00371584	-0.0994106	0.0342638	1.84013e-10	1.61231e-11	0.00369144	1	0.140732
rs200352	14:99377084	G:0.291801	rs200349	14:99378300	T:0.291745	18038	6685	5	1	0.00373131	0.971624	0.019817	0.557107	0.796095	-0.144076	0.557564	0.883372	-0.0820628	0.559408	0.673353	-0.235922	0.559652	0.00368055	0.121544	0.0418494	3.34105e-05	2.21418e-06	0.00373131	1	0.140732
rs1522812	2:226997454	A:0.359909	rs1967951	16:19503773	T:0.338348	17949	6630	5	1	0.00376352	5.01265e-05	0.108109	0.0266604	3.66789e-05	-0.111363	0.0269809	0.173351	0.0464715	0.0341322	6.27939e-07	-0.185263	0.0371833	0.00376199	0.105601	0.036446	4.86852e-08	3.87662e-09	0.00376352	1	0.140732
rs1522812	2:226997454	A:0.360414	rs10885406	10:114777724	A:0.452215	17903	6613	5	1	0.00377973	3.79381e-05	0.109866	0.0266685	2.00311e-07	-0.133822	0.0257397	1.40804e-06	0.20799	0.0431168	0.135788	-0.0556073	0.0372788	0.0038009	-0.0995593	0.0343992	2.72485e-10	2.42099e-11	0.00377973	1	0.140732
rs6436602	2:227005350	G:0.364801	rs7899529	10:114779538	G:0.452465	18029	6684	5	1	0.00380009	3.46557e-05	0.109637	0.0264792	2.79148e-07	-0.13174	0.0256453	1.32716e-06	0.206911	0.0427888	0.154262	-0.0531627	0.0373166	0.00382102	-0.0987508	0.0341394	3.41773e-10	3.03845e-11	0.00380009	1	0.140732
rs1522812	2:226997454	A:0.359967	rs2521791	16:19508824	C:0.338614	17960	6638	5	1	0.0038577	4.78386e-05	0.108346	0.0266472	3.12447e-05	-0.11231	0.0269704	0.168956	0.0469232	0.0341119	5.62742e-07	-0.185982	0.0371698	0.00385889	0.105209	0.0364112	4.02041e-08	3.28656e-09	0.0038577	1	0.140732
rs1522812	2:226997454	A:0.359987	rs2187659	16:19508573	A:0.338605	17959	6638	5	1	0.00386185	4.80846e-05	0.108313	0.0266469	3.116e-05	-0.112325	0.0269699	0.169178	0.0468982	0.0341115	5.62064e-07	-0.185986	0.0371687	0.00386293	0.105195	0.0364106	4.03221e-08	3.29913e-09	0.00386185	1	0.140732
rs1522812	2:226997454	A:0.359987	rs2187660	16:19508583	C:0.338605	17959	6638	5	1	0.00386185	4.80846e-05	0.108313	0.0266469	3.116e-05	-0.112325	0.0269699	0.169178	0.0468982	0.0341115	5.62064e-07	-0.185986	0.0371687	0.00386293	0.105195	0.0364106	4.03221e-08	3.29913e-09	0.00386185	1	0.140732
rs62026181	16:19506239	T:0.336041	rs2856609	16:19506773	G:0.338777	18096	6713	5	1	0.00388267	0.700666	0.0914767	0.237959	0.39464	-0.202586	0.237991	0.316147	0.244281	0.243695	0.486667	-0.165746	0.238271	0.00390503	-0.111712	0.0387117	0.000152242	9.92212e-06	0.00388267	1	0.140732
rs1475963	16:19505282	G:0.338777	rs62026181	16:19506239	T:0.336041	18096	6713	5	1	0.00388267	0.39464	-0.202586	0.237991	0.700666	0.0914767	0.237959	0.486667	-0.165746	0.238271	0.316147	0.244281	0.243695	0.00390503	-0.111712	0.0387117	0.000152242	9.92212e-06	0.00388267	1	0.140732
rs1475964	16:19505406	T:0.338777	rs62026181	16:19506239	T:0.336041	18096	6713	5	1	0.00388267	0.39464	-0.202586	0.237991	0.700666	0.0914767	0.237959	0.486667	-0.165746	0.238271	0.316147	0.244281	0.243695	0.00390503	-0.111712	0.0387117	0.000152242	9.92212e-06	0.00388267	1	0.140732
rs4421962	16:19505852	C:0.338777	rs62026181	16:19506239	T:0.336041	18096	6713	5	1	0.00388267	0.39464	-0.202586	0.237991	0.700666	0.0914767	0.237959	0.486667	-0.165746	0.238271	0.316147	0.244281	0.243695	0.00390503	-0.111712	0.0387117	0.000152242	9.92212e-06	0.00388267	1	0.140732
rs62026181	16:19506239	T:0.336041	rs2856610	16:19507031	T:0.338777	18096	6713	5	1	0.00388267	0.700666	0.0914767	0.237959	0.39464	-0.202586	0.237991	0.316147	0.244281	0.243695	0.486667	-0.165746	0.238271	0.00390503	-0.111712	0.0387117	0.000152242	9.92212e-06	0.00388267	1	0.140732
rs2245423	16:19505730	T:0.338777	rs62026181	16:19506239	T:0.336041	18096	6713	5	1	0.00388267	0.39464	-0.202586	0.237991	0.700666	0.0914767	0.237959	0.486667	-0.165746	0.238271	0.316147	0.244281	0.243695	0.00390503	-0.111712	0.0387117	0.000152242	9.92212e-06	0.00388267	1	0.140732
rs10861525	12:106260341	C:0.31843	rs7972359	12:106264199	G:0.339252	17938	6653	5	1	0.00388684	0.0428516	0.14831	0.0732342	0.679823	-0.0297081	0.071984	0.00116498	0.28086	0.0864899	0.720183	0.0267295	0.0746189	0.00392948	-0.113916	0.0395024	3.08394e-05	2.12399e-06	0.00388684	1	0.140732
rs62026181	16:19506239	T:0.335978	rs2187660	16:19508583	C:0.338714	18089	6712	5	1	0.0038994	0.699155	0.0919627	0.237961	0.396067	-0.201977	0.237993	0.315302	0.244711	0.243698	0.48821	-0.16516	0.238272	0.00392279	-0.111678	0.0387192	0.000181322	1.17873e-05	0.0038994	1	0.140732
rs62026181	16:19506239	T:0.335978	rs2187659	16:19508573	A:0.338714	18089	6712	5	1	0.0038994	0.699155	0.0919627	0.237961	0.396067	-0.201977	0.237993	0.315302	0.244711	0.243698	0.48821	-0.16516	0.238272	0.00392279	-0.111678	0.0387192	0.000181322	1.17873e-05	0.0038994	1	0.140732
rs62026181	16:19506239	T:0.335978	rs2521791	16:19508824	C:0.338714	18089	6712	5	1	0.0038994	0.699155	0.0919627	0.237961	0.396067	-0.201977	0.237993	0.315302	0.244711	0.243698	0.48821	-0.16516	0.238272	0.00392279	-0.111678	0.0387192	0.000181322	1.17873e-05	0.0038994	1	0.140732
rs1475962	16:19503598	C:0.338786	rs62026181	16:19506239	T:0.336051	18094	6711	5	1	0.00392042	0.396012	-0.202	0.237993	0.701768	0.0911236	0.237961	0.488076	-0.165212	0.238273	0.317129	0.24379	0.243698	0.0039432	-0.111599	0.0387137	0.000157998	1.0371e-05	0.00392042	1	0.140732
rs1967952	16:19503828	T:0.338786	rs62026181	16:19506239	T:0.336051	18094	6711	5	1	0.00392042	0.396012	-0.202	0.237993	0.701768	0.0911236	0.237961	0.488076	-0.165212	0.238273	0.317129	0.24379	0.243698	0.0039432	-0.111599	0.0387137	0.000157998	1.0371e-05	0.00392042	1	0.140732
rs62026181	16:19506239	T:0.336301	rs2074172	16:19529042	A:0.339989	18030	6688	5	1	0.0039628	0.560291	0.118986	0.204299	0.260242	-0.230148	0.204427	0.198464	0.271424	0.21107	0.346339	-0.192939	0.20488	0.00398759	-0.111658	0.0387815	0.000135011	8.99652e-06	0.0039628	1	0.140732
rs12255372	10:114808902	T:0.284891	rs1555944	14:68625118	G:0.322414	17949	6673	5	1	0.00397561	2.41699e-16	0.221737	0.0270432	0.000132919	0.116457	0.0304783	7.35874e-16	0.290073	0.0359695	1.72571e-06	0.178397	0.037297	0.00397308	-0.105795	0.0367308	2.54923e-18	3.07169e-19	0.00397561	1	0.140732
rs2353696	16:19505813	T:0.338832	rs62026181	16:19506239	T:0.336041	18096	6713	5	1	0.00398846	0.318231	-0.235443	0.235891	0.598848	0.124068	0.235845	0.399636	-0.198916	0.236166	0.25226	0.276653	0.241644	0.00400846	-0.111394	0.0387122	0.000132529	8.88704e-06	0.00398846	1	0.140732
rs6436602	2:227005350	G:0.364734	rs12258200	10:114781698	T:0.449466	18057	6702	5	1	0.00404027	3.56404e-05	0.109405	0.0264642	5.81665e-08	-0.139531	0.0257231	1.44928e-06	0.205721	0.0426976	0.104184	-0.0609429	0.0375057	0.0040646	-0.0981994	0.0341788	7.59625e-11	7.32905e-12	0.00404027	1	0.140732
rs1522812	2:226997454	A:0.3599	rs1134662	16:19510249	G:0.338736	17955	6632	5	1	0.00408838	4.89086e-05	0.108239	0.0266548	3.92742e-05	-0.110919	0.0269764	0.167388	0.0471285	0.0341351	7.30797e-07	-0.18413	0.0371755	0.00409104	0.104572	0.0364227	5.11214e-08	4.37612e-09	0.00408838	1	0.140732
rs1522812	2:226997454	A:0.3599	rs2856614	16:19512116	T:0.338736	17955	6632	5	1	0.00408838	4.89086e-05	0.108239	0.0266548	3.92742e-05	-0.110919	0.0269764	0.167388	0.0471285	0.0341351	7.30797e-07	-0.18413	0.0371755	0.00409104	0.104572	0.0364227	5.11214e-08	4.37612e-09	0.00408838	1	0.140732
rs599136	10:112823415	A:0.0599215	rs11196208	10:114811316	T:0.457595	17840	6613	5	1	0.00409278	6.17738e-05	-0.215301	0.0537456	5.3593e-08	-0.140221	0.0257809	2.63843e-06	-0.409598	0.0872017	1.592e-09	-0.162725	0.0269646	0.00407405	0.212349	0.0739281	8.08617e-11	7.88338e-12	0.00409278	1	0.140732
rs6436602	2:227005350	G:0.364693	rs11196191	10:114780633	A:0.44936	18059	6703	5	1	0.00411486	3.52212e-05	0.109494	0.0264684	5.73214e-08	-0.139593	0.025722	1.46863e-06	0.205613	0.0426985	0.102959	-0.0611591	0.0375053	0.00413865	-0.0980048	0.034179	7.41304e-11	7.27301e-12	0.00411486	1	0.140732
rs62026181	16:19506239	T:0.336126	rs2856614	16:19512116	T:0.338809	18081	6706	5	1	0.00411929	0.808494	0.0570379	0.235335	0.480823	-0.165942	0.235386	0.390135	0.207201	0.241108	0.588232	-0.127661	0.235799	0.00414044	-0.111015	0.0387181	0.000233278	1.57632e-05	0.00411929	1	0.140732
rs62026181	16:19506239	T:0.336126	rs1134662	16:19510249	G:0.338809	18081	6706	5	1	0.00411929	0.808494	0.0570379	0.235335	0.480823	-0.165942	0.235386	0.390135	0.207201	0.241108	0.588232	-0.127661	0.235799	0.00414044	-0.111015	0.0387181	0.000233278	1.57632e-05	0.00411929	1	0.140732
rs2856608	16:19505751	G:0.335013	rs2856611	16:19507199	G:0.338445	18062	6695	5	1	0.00414152	0.574698	-0.114547	0.204131	0.996558	0.000881342	0.204325	0.856414	0.0382299	0.211285	0.857829	0.036732	0.205048	0.00416691	-0.111254	0.038829	0.000120905	8.40667e-06	0.00414152	1	0.140732
rs599136	10:112823415	A:0.059926	rs12718338	10:114813047	C:0.458172	17847	6616	5	1	0.00418633	6.01511e-05	-0.215624	0.0537419	4.52043e-08	-0.140946	0.0257709	2.66952e-06	-0.409593	0.0872451	1.34874e-09	-0.16338	0.0269538	0.00417154	0.211892	0.0739615	6.7299e-11	6.71631e-12	0.00418633	1	0.140732
rs1522812	2:226997454	A:0.359959	rs2856609	16:19506773	G:0.33866	17959	6635	5	1	0.00426826	4.93233e-05	0.108179	0.0266528	2.62609e-05	-0.113374	0.0269701	0.164595	0.0474192	0.0341199	5.43494e-07	-0.186229	0.0371693	0.00427082	0.104059	0.0364169	3.49641e-08	3.13637e-09	0.00426826	1	0.140732
rs1522812	2:226997454	A:0.359959	rs2856610	16:19507031	T:0.33866	17959	6635	5	1	0.00426826	4.93233e-05	0.108179	0.0266528	2.62609e-05	-0.113374	0.0269701	0.164595	0.0474192	0.0341199	5.43494e-07	-0.186229	0.0371693	0.00427082	0.104059	0.0364169	3.49641e-08	3.13637e-09	0.00426826	1	0.140732
rs7821832	8:25889446	G:0.302437	rs6585201	10:114768783	G:0.467297	17888	6604	5	1	0.0043612	0.00034879	-0.0987427	0.027612	2.84519e-08	-0.141791	0.0255447	7.62879e-06	-0.192407	0.0429927	1.11281e-09	-0.201466	0.0330688	0.00436136	0.10396	0.0364672	2.03485e-10	2.06481e-11	0.0043612	1	0.140732
rs1522812	2:226997454	A:0.359994	rs1967952	16:19503828	T:0.338725	17960	6634	5	1	0.00443703	5.28038e-05	0.107742	0.02665	2.5466e-05	-0.113557	0.0269692	0.166262	0.0472323	0.0341196	5.52951e-07	-0.186106	0.0371695	0.00443753	0.103608	0.0364143	3.63214e-08	3.36915e-09	0.00443703	1	0.140732
rs1522812	2:226997454	A:0.359994	rs1475962	16:19503598	C:0.338725	17960	6634	5	1	0.00443703	5.28038e-05	0.107742	0.02665	2.5466e-05	-0.113557	0.0269692	0.166262	0.0472323	0.0341196	5.52951e-07	-0.186106	0.0371695	0.00443753	0.103608	0.0364143	3.63214e-08	3.36915e-09	0.00443703	1	0.140732
rs1522812	2:226997454	A:0.359947	rs4421962	16:19505852	C:0.338706	17961	6636	5	1	0.00444182	5.18976e-05	0.107855	0.0266513	2.47487e-05	-0.113729	0.0269688	0.165151	0.047356	0.0341193	5.40032e-07	-0.186273	0.037169	0.00444009	0.103603	0.0364147	3.47259e-08	3.22749e-09	0.00444182	1	0.140732
rs1522812	2:226997454	A:0.359947	rs2245423	16:19505730	T:0.338706	17961	6636	5	1	0.00444182	5.18976e-05	0.107855	0.0266513	2.47487e-05	-0.113729	0.0269688	0.165151	0.047356	0.0341193	5.40032e-07	-0.186273	0.037169	0.00444009	0.103603	0.0364147	3.47259e-08	3.22749e-09	0.00444182	1	0.140732
rs1522812	2:226997454	A:0.359947	rs1475964	16:19505406	T:0.338706	17961	6636	5	1	0.00444182	5.18976e-05	0.107855	0.0266513	2.47487e-05	-0.113729	0.0269688	0.165151	0.047356	0.0341193	5.40032e-07	-0.186273	0.037169	0.00444009	0.103603	0.0364147	3.47259e-08	3.22749e-09	0.00444182	1	0.140732
rs1522812	2:226997454	A:0.359947	rs1475963	16:19505282	G:0.338706	17961	6636	5	1	0.00444182	5.18976e-05	0.107855	0.0266513	2.47487e-05	-0.113729	0.0269688	0.165151	0.047356	0.0341193	5.40032e-07	-0.186273	0.037169	0.00444009	0.103603	0.0364147	3.47259e-08	3.22749e-09	0.00444182	1	0.140732
rs62026181	16:19506239	T:0.336817	rs2521793	16:19511391	C:0.341387	17943	6655	5	1	0.0044562	0.675257	0.0685067	0.163522	0.269394	-0.180478	0.163408	0.221918	0.208388	0.170608	0.417965	-0.132931	0.164121	0.00448012	-0.110389	0.038839	0.000129839	9.60048e-06	0.0044562	1	0.140732
rs1522812	2:226997454	A:0.360398	rs10787473	10:114781400	C:0.452423	17908	6622	5	1	0.00447545	3.91019e-05	0.109634	0.0266572	1.82584e-07	-0.13423	0.0257331	1.77237e-06	0.205873	0.0430896	0.122445	-0.0575415	0.0372535	0.00449893	-0.0976843	0.0343852	2.56476e-10	2.6518e-11	0.00447545	1	0.140732
rs1522812	2:226997454	A:0.360376	rs10787472	10:114781297	A:0.452333	17916	6627	5	1	0.00452883	3.72327e-05	0.10992	0.0266537	1.98347e-07	-0.133808	0.0257279	1.73645e-06	0.206	0.0430792	0.124261	-0.0572479	0.0372434	0.004553	-0.0975376	0.0343797	2.66433e-10	2.78199e-11	0.00452883	1	0.140732
rs10195178	2:227199263	T:0.428103	rs10860059	12:97046476	G:0.258779	17998	6667	5	1	0.0045484	3.432e-06	0.11658	0.0251083	2.76944e-05	-0.120835	0.0288277	7.12338e-08	0.174815	0.0324451	0.635098	-0.021468	0.0452373	0.00457637	-0.111751	0.0394125	2.34016e-09	2.35232e-10	0.0045484	1	0.140732
rs2972152	2:227066574	A:0.280636	rs17866193	4:118392862	C:0.443682	17863	6625	5	1	0.00455822	1.49905e-06	-0.13403	0.027857	3.37706e-06	0.11866	0.0255379	0.466669	-0.0328638	0.0451482	7.5476e-08	0.179805	0.0334357	0.00457876	-0.108324	0.0382058	1.71854e-10	1.81935e-11	0.00455822	1	0.140732
rs1522812	2:226997454	A:0.359947	rs2353696	16:19505813	T:0.338734	17961	6636	5	1	0.00470303	5.16972e-05	0.10788	0.0266514	2.36359e-05	-0.114018	0.0269709	0.161811	0.0477417	0.0341254	5.53985e-07	-0.186086	0.0371682	0.00470208	0.102939	0.0364159	3.32329e-08	3.25223e-09	0.00470303	1	0.140732
rs7708975	5:132650567	T:0.0958137	rs6997996	8:25891653	G:0.278098	18035	6665	5	1	0.00470811	0.000262367	-0.157023	0.0430216	3.03971e-05	-0.115914	0.027794	0.363197	-0.051624	0.0567739	0.00827113	-0.0804482	0.0304636	0.00487694	-0.18311	0.0650468	2.05373e-07	1.92742e-08	0.00470811	1	0.140732
rs7821832	8:25889446	G:0.302346	rs10885405	10:114777670	C:0.462161	17905	6611	5	1	0.00473868	0.000389993	-0.0978798	0.0275969	3.24351e-07	-0.130215	0.0254888	9.01306e-06	-0.189927	0.0427804	9.82172e-09	-0.189273	0.0330102	0.00473927	0.103109	0.0365084	2.47653e-09	2.57865e-10	0.00473868	1	0.140732
rs6585201	10:114768783	G:0.466572	rs4148427	13:95925674	T:0.252862	17994	6673	5	1	0.00479009	1.34366e-08	-0.144585	0.0254533	1.23279e-05	-0.153899	0.0352034	0.000619445	-0.101549	0.029667	0.0702907	-0.0795701	0.0439606	0.00484474	-0.0851309	0.0302185	6.04944e-12	7.08942e-13	0.00479009	1	0.140732
rs6997996	8:25891653	G:0.278131	rs11158715	14:68489386	T:0.305607	17925	6633	5	1	0.00487879	7.04622e-05	-0.110784	0.0278721	0.000232105	0.106907	0.0290409	0.282095	-0.0402375	0.0374085	3.5852e-06	0.1677	0.0361884	0.00492207	-0.10978	0.0390385	3.46633e-07	3.31354e-08	0.00487879	1	0.140732
rs2245423	16:19505730	T:0.338668	rs2856608	16:19505751	G:0.335351	18090	6706	5	1	0.0049158	0.947308	-0.0140923	0.213236	0.639531	-0.0997906	0.213066	0.930081	0.0187658	0.213871	0.812292	0.0522685	0.220105	0.00494007	-0.108997	0.0387765	0.00011707	9.46583e-06	0.0049158	1	0.140732
rs1475963	16:19505282	G:0.338668	rs2856608	16:19505751	G:0.335351	18090	6706	5	1	0.0049158	0.947308	-0.0140923	0.213236	0.639531	-0.0997906	0.213066	0.930081	0.0187658	0.213871	0.812292	0.0522685	0.220105	0.00494007	-0.108997	0.0387765	0.00011707	9.46583e-06	0.0049158	1	0.140732
rs2856608	16:19505751	G:0.335351	rs4421962	16:19505852	C:0.338668	18090	6706	5	1	0.0049158	0.639531	-0.0997906	0.213066	0.947308	-0.0140923	0.213236	0.812292	0.0522685	0.220105	0.930081	0.0187658	0.213871	0.00494007	-0.108997	0.0387765	0.00011707	9.46583e-06	0.0049158	1	0.140732
rs1475964	16:19505406	T:0.338668	rs2856608	16:19505751	G:0.335351	18090	6706	5	1	0.0049158	0.947308	-0.0140923	0.213236	0.639531	-0.0997906	0.213066	0.930081	0.0187658	0.213871	0.812292	0.0522685	0.220105	0.00494007	-0.108997	0.0387765	0.00011707	9.46583e-06	0.0049158	1	0.140732
rs7821832	8:25889446	G:0.302471	rs12255372	10:114808902	T:0.284398	18010	6650	5	1	0.00492111	0.000293556	-0.0998143	0.027566	3.96364e-16	0.220177	0.0270498	0.366558	-0.0328435	0.0363739	2.00916e-15	0.288194	0.0362929	0.00495009	-0.115365	0.0410514	4.43055e-18	6.42427e-19	0.00492111	1	0.140732
rs1967952	16:19503828	T:0.338678	rs2856608	16:19505751	G:0.33536	18088	6704	5	1	0.00495845	0.949465	-0.0135149	0.213241	0.638382	-0.100135	0.213071	0.928133	0.0192902	0.213875	0.814031	0.0517765	0.220112	0.00498956	-0.108879	0.0387785	0.000121497	9.88483e-06	0.00495845	1	0.140732
rs1475962	16:19503598	C:0.338678	rs2856608	16:19505751	G:0.33536	18088	6704	5	1	0.00495845	0.949465	-0.0135149	0.213241	0.638382	-0.100135	0.213071	0.928133	0.0192902	0.213875	0.814031	0.0517765	0.220112	0.00498956	-0.108879	0.0387785	0.000121497	9.88483e-06	0.00495845	1	0.140732
rs2856608	16:19505751	G:0.335351	rs2353696	16:19505813	T:0.338723	18090	6706	5	1	0.00503399	0.740015	-0.0700539	0.211112	0.83467	-0.0441014	0.211299	0.707735	0.0818076	0.218212	0.956529	-0.0115513	0.211913	0.00506135	-0.108696	0.038777	0.000114806	9.48368e-06	0.00503399	1	0.140732
rs7821832	8:25889446	G:0.302126	rs6585202	10:114782803	T:0.462423	17923	6630	5	1	0.00511623	0.000365474	-0.0982839	0.0275781	2.79106e-07	-0.130815	0.0254651	9.34172e-06	-0.189549	0.0427694	9.47824e-09	-0.189358	0.0329903	0.00511235	0.102126	0.0364751	2.00556e-09	2.24457e-10	0.00511623	1	0.140732
rs6436602	2:227005350	G:0.364604	rs2856608	16:19505751	G:0.335296	18084	6702	5	1	0.00513839	4.32759e-05	0.108228	0.0264664	2.11122e-05	-0.114075	0.0268235	0.146256	0.0492039	0.0338664	5.73443e-07	-0.185862	0.0371727	0.00514513	0.100955	0.0360838	2.58061e-08	2.74661e-09	0.00513839	1	0.140732
rs6436602	2:227005350	G:0.364353	rs2521793	16:19511391	C:0.341402	17951	6655	5	1	0.00513839	6.76192e-05	0.105844	0.0265639	2.49358e-05	-0.113427	0.0269078	0.179798	0.0458272	0.0341643	6.58598e-07	-0.185469	0.0372938	0.00514178	0.101015	0.0361024	4.59145e-08	4.82346e-09	0.00513839	1	0.140732
rs2856608	16:19505751	G:0.335287	rs2521791	16:19508824	C:0.33855	18083	6705	5	1	0.00521109	0.643681	-0.0974143	0.210599	0.941778	-0.0153928	0.210757	0.814842	0.0509238	0.217452	0.925004	0.019902	0.211425	0.00523776	-0.108255	0.0387726	0.000139978	1.18317e-05	0.00521109	1	0.140732
rs2856608	16:19505751	G:0.335287	rs2187659	16:19508573	A:0.33855	18083	6705	5	1	0.00521109	0.643681	-0.0974143	0.210599	0.941778	-0.0153928	0.210757	0.814842	0.0509238	0.217452	0.925004	0.019902	0.211425	0.00523776	-0.108255	0.0387726	0.000139978	1.18317e-05	0.00521109	1	0.140732
rs2856608	16:19505751	G:0.335287	rs2187660	16:19508583	C:0.33855	18083	6705	5	1	0.00521109	0.643681	-0.0974143	0.210599	0.941778	-0.0153928	0.210757	0.814842	0.0509238	0.217452	0.925004	0.019902	0.211425	0.00523776	-0.108255	0.0387726	0.000139978	1.18317e-05	0.00521109	1	0.140732
rs1967951	16:19503773	T:0.338412	rs62026181	16:19506239	T:0.335757	18083	6707	5	1	0.00522801	0.393394	-0.199492	0.23374	0.697915	0.0907259	0.233747	0.495931	-0.159489	0.234231	0.327927	0.234172	0.239367	0.00525345	-0.108071	0.0387202	0.00021893	1.82529e-05	0.00522801	1	0.140732
rs6573817	14:68617269	G:0.319826	rs1555944	14:68625118	G:0.322251	17941	6669	5	1	0.00527342	0.691337	0.0979178	0.246619	0.945642	0.0167655	0.245901	0.309134	0.257352	0.25304	0.851984	0.0459089	0.246045	0.00525401	-0.111496	0.0399481	0.000876948	6.97116e-05	0.00527342	1	0.140732
rs2856608	16:19505751	G:0.335305	rs2856609	16:19506773	G:0.338622	18088	6705	5	1	0.00528484	0.639573	-0.0997759	0.213062	0.948507	-0.0137708	0.213231	0.816645	0.0510328	0.220099	0.929892	0.018816	0.213864	0.00531031	-0.108105	0.0387811	0.000123651	1.0628e-05	0.00528484	1	0.140732
rs2856608	16:19505751	G:0.335305	rs2856610	16:19507031	T:0.338622	18088	6705	5	1	0.00528484	0.639573	-0.0997759	0.213062	0.948507	-0.0137708	0.213231	0.816645	0.0510328	0.220099	0.929892	0.018816	0.213864	0.00531031	-0.108105	0.0387811	0.000123651	1.0628e-05	0.00528484	1	0.140732
rs4646362	17:17468641	C:0.494778	rs4149477	22:26931305	C:0.481973	18001	6687	5	1	0.00530774	0.223912	-0.0653066	0.0536976	0.00392427	0.198411	0.0687929	0.50029	0.0452182	0.0670859	9.6336e-05	0.315888	0.0810043	0.00542691	-0.161014	0.0579076	9.27499e-08	9.86327e-09	0.00530774	1	0.140732
rs6436602	2:227005350	G:0.364572	rs6585200	10:114768609	A:0.453587	17980	6672	5	1	0.00533652	4.20473e-05	0.108713	0.0265417	9.32227e-09	-0.148228	0.0258119	2.39032e-06	0.203296	0.0430961	0.0558751	-0.071909	0.0376091	0.00536322	-0.0955074	0.0343013	1.40105e-11	1.78258e-12	0.00533652	1	0.140732
rs2856608	16:19505751	G:0.335636	rs2074172	16:19529042	A:0.339825	18024	6681	5	1	0.00537707	0.799036	-0.0474583	0.186407	0.721355	-0.0665607	0.186628	0.606021	0.100074	0.194031	0.86964	-0.030744	0.187331	0.00540762	-0.108021	0.0388328	0.000124135	1.083e-05	0.00537707	1	0.140732
rs2856608	16:19505751	G:0.335436	rs2856614	16:19512116	T:0.338645	18075	6699	5	1	0.00545321	0.558544	-0.122203	0.208893	0.959834	0.0105288	0.209063	0.912229	0.0237804	0.215738	0.82207	0.0471906	0.209845	0.00548482	-0.10767	0.0387709	0.000161903	1.41608e-05	0.00545321	1	0.140732
rs2856608	16:19505751	G:0.335436	rs1134662	16:19510249	G:0.338645	18075	6699	5	1	0.00545321	0.558544	-0.122203	0.208893	0.959834	0.0105288	0.209063	0.912229	0.0237804	0.215738	0.82207	0.0471906	0.209845	0.00548482	-0.10767	0.0387709	0.000161903	1.41608e-05	0.00545321	1	0.140732
rs4132670	10:114767771	A:0.397134	rs10787473	10:114781400	C:0.452554	17936	6655	5	1	0.00547686	2.01525e-13	0.275448	0.0374872	0.116595	0.0577056	0.0367733	3.46883e-08	0.227558	0.0412546	0.659581	0.0174254	0.0395591	0.00546966	0.112854	0.0406243	1.6188e-18	2.61159e-19	0.00547686	1	0.140732
rs4132670	10:114767771	A:0.397069	rs10787472	10:114781297	A:0.452463	17944	6660	5	1	0.0055185	1.38498e-13	0.277016	0.0374458	0.10766	0.0591041	0.036738	2.71048e-08	0.229148	0.0412197	0.633316	0.0188566	0.0395263	0.00550841	0.11274	0.0406169	1.2077e-18	1.96785e-19	0.0055185	1	0.140732
rs6585202	10:114782803	T:0.461728	rs4148427	13:95925674	T:0.252454	18029	6699	5	1	0.00554244	1.39992e-07	-0.133598	0.0253735	7.2583e-06	-0.157634	0.0351394	0.00196634	-0.0914922	0.0295587	0.0523502	-0.0849971	0.0438075	0.00559795	-0.0835916	0.0301726	3.46426e-11	4.48853e-12	0.00554244	1	0.140732
rs2856611	16:19507199	G:0.338776	rs1134662	16:19510249	G:0.33861	18068	6700	5	1	0.00557251	0.824939	-0.144916	0.655143	0.958384	0.0341834	0.655083	0.892401	-0.0888868	0.65712	0.808302	0.159719	0.658315	0.00560289	-0.106732	0.0385293	0.00019264	1.70585e-05	0.00557251	1	0.140732
rs2856611	16:19507199	G:0.338776	rs2856614	16:19512116	T:0.33861	18068	6700	5	1	0.00557251	0.824939	-0.144916	0.655143	0.958384	0.0341834	0.655083	0.892401	-0.0888868	0.65712	0.808302	0.159719	0.658315	0.00560289	-0.106732	0.0385293	0.00019264	1.70585e-05	0.00557251	1	0.140732
rs1522812	2:226997454	A:0.360016	rs62026181	16:19506239	T:0.335784	17952	6634	5	1	0.00559063	4.61278e-05	0.108605	0.0266554	4.29731e-05	-0.110305	0.0269636	0.143765	0.0498329	0.0340875	1.12546e-06	-0.181105	0.0372006	0.0055891	0.101104	0.0364868	5.30023e-08	5.97839e-09	0.00559063	1	0.140732
rs6436602	2:227005350	G:0.364813	rs2856611	16:19507199	G:0.338672	18075	6702	5	1	0.00560881	3.57387e-05	0.109373	0.0264606	2.65938e-05	-0.112792	0.0268499	0.134488	0.050746	0.0339068	7.64247e-07	-0.18376	0.0371661	0.00561437	0.0997016	0.036	2.66513e-08	3.06241e-09	0.00560881	1	0.140732
rs2856611	16:19507199	G:0.338626	rs2187659	16:19508573	A:0.338515	18076	6706	5	1	0.00565148	0.8472	0.13536	0.702467	0.72491	-0.247164	0.702359	0.78261	0.194557	0.705125	0.859371	-0.125099	0.706073	0.00567287	-0.10656	0.0385234	0.000156921	1.41741e-05	0.00565148	1	0.140732
rs2856611	16:19507199	G:0.338626	rs2187660	16:19508583	C:0.338515	18076	6706	5	1	0.00565148	0.8472	0.13536	0.702467	0.72491	-0.247164	0.702359	0.78261	0.194557	0.705125	0.859371	-0.125099	0.706073	0.00567287	-0.10656	0.0385234	0.000156921	1.41741e-05	0.00565148	1	0.140732
rs2856611	16:19507199	G:0.338626	rs2521791	16:19508824	C:0.338515	18076	6706	5	1	0.00565148	0.8472	0.13536	0.702467	0.72491	-0.247164	0.702359	0.78261	0.194557	0.705125	0.859371	-0.125099	0.706073	0.00567287	-0.10656	0.0385234	0.000156921	1.41741e-05	0.00565148	1	0.140732
rs6436602	2:227005350	G:0.364838	rs7918599	10:114777396	C:0.449515	18045	6693	5	1	0.005676	3.82135e-05	0.109049	0.0264808	8.72039e-08	-0.137615	0.0257149	2.32481e-06	0.201761	0.0427196	0.0987981	-0.061934	0.0375197	0.00570322	-0.0944409	0.0341636	1.21863e-10	1.57714e-11	0.005676	1	0.140732
rs17866193	4:118392862	C:0.441988	rs4132670	10:114767771	A:0.396915	17893	6627	5	1	0.00568831	2.75692e-06	0.119903	0.0255758	6.21856e-19	0.233365	0.026256	0.184741	0.0482887	0.0364086	0.00019073	0.149554	0.0400843	0.0057121	0.0932879	0.0337527	1.06516e-22	1.95551e-23	0.00568831	1	0.140732
rs4421962	16:19505852	C:0.338635	rs2856611	16:19507199	G:0.338745	18077	6704	5	1	0.00569447	0.724479	-0.247572	0.702374	0.847852	0.134778	0.702481	0.85878	-0.125632	0.706085	0.783289	0.193938	0.705138	0.00572309	-0.106444	0.0385215	0.000134091	1.22624e-05	0.00569447	1	0.140732
rs2856609	16:19506773	G:0.338635	rs2856611	16:19507199	G:0.338745	18077	6704	5	1	0.00569447	0.724479	-0.247572	0.702374	0.847852	0.134778	0.702481	0.85878	-0.125632	0.706085	0.783289	0.193938	0.705138	0.00572309	-0.106444	0.0385215	0.000134091	1.22624e-05	0.00569447	1	0.140732
rs1475963	16:19505282	G:0.338635	rs2856611	16:19507199	G:0.338745	18077	6704	5	1	0.00569447	0.724479	-0.247572	0.702374	0.847852	0.134778	0.702481	0.85878	-0.125632	0.706085	0.783289	0.193938	0.705138	0.00572309	-0.106444	0.0385215	0.000134091	1.22624e-05	0.00569447	1	0.140732
rs2856610	16:19507031	T:0.338635	rs2856611	16:19507199	G:0.338745	18077	6704	5	1	0.00569447	0.724479	-0.247572	0.702374	0.847852	0.134778	0.702481	0.85878	-0.125632	0.706085	0.783289	0.193938	0.705138	0.00572309	-0.106444	0.0385215	0.000134091	1.22624e-05	0.00569447	1	0.140732
rs2245423	16:19505730	T:0.338635	rs2856611	16:19507199	G:0.338745	18077	6704	5	1	0.00569447	0.724479	-0.247572	0.702374	0.847852	0.134778	0.702481	0.85878	-0.125632	0.706085	0.783289	0.193938	0.705138	0.00572309	-0.106444	0.0385215	0.000134091	1.22624e-05	0.00569447	1	0.140732
rs1475964	16:19505406	T:0.338635	rs2856611	16:19507199	G:0.338745	18077	6704	5	1	0.00569447	0.724479	-0.247572	0.702374	0.847852	0.134778	0.702481	0.85878	-0.125632	0.706085	0.783289	0.193938	0.705138	0.00572309	-0.106444	0.0385215	0.000134091	1.22624e-05	0.00569447	1	0.140732
rs1522812	2:226997454	A:0.360636	rs10885405	10:114777670	C:0.46162	17874	6604	5	1	0.00570064	3.586e-05	0.11023	0.026673	1.83047e-07	-0.13301	0.0255014	2.33398e-06	0.204701	0.0433494	0.10688	-0.059402	0.0368413	0.00573213	-0.0948844	0.0343445	2.44016e-10	3.13008e-11	0.00570064	1	0.140732
rs6436602	2:227005350	G:0.364997	rs2074172	16:19529042	A:0.340141	18044	6689	5	1	0.005713	3.99548e-05	0.108745	0.0264732	2.55914e-05	-0.113192	0.0268895	0.140597	0.050043	0.0339604	7.54933e-07	-0.184124	0.0372218	0.00571269	0.0995396	0.0360151	2.83701e-08	3.30859e-09	0.005713	1	0.140732
rs74987670	10:112820864	G:0.059779	chr10:114772253:i	10:114772253	C:0.449738	17916	6640	5	1	0.00575024	1.35595e-05	-0.233598	0.0536898	2.10457e-07	-0.134085	0.025836	1.20477e-06	-0.414118	0.0852998	8.28036e-09	-0.155626	0.0270061	0.00571391	0.202442	0.0732485	7.4931e-11	9.89572e-12	0.00575024	1	0.140732
rs1475962	16:19503598	C:0.338645	rs2856611	16:19507199	G:0.338755	18075	6702	5	1	0.00575024	0.723989	-0.248013	0.702322	0.847085	0.135456	0.70243	0.858145	-0.126193	0.706031	0.782616	0.194541	0.705083	0.00577838	-0.106329	0.0385235	0.00013916	1.28169e-05	0.00575024	1	0.140732
rs1967952	16:19503828	T:0.338645	rs2856611	16:19507199	G:0.338755	18075	6702	5	1	0.00575024	0.723989	-0.248013	0.702322	0.847085	0.135456	0.70243	0.858145	-0.126193	0.706031	0.782616	0.194541	0.705083	0.00577838	-0.106329	0.0385235	0.00013916	1.28169e-05	0.00575024	1	0.140732
rs2856611	16:19507199	G:0.338958	rs2074172	16:19529042	A:0.33979	18017	6682	5	1	0.00581285	0.630545	0.164232	0.341468	0.417021	-0.277214	0.341565	0.402574	0.288407	0.344558	0.519576	-0.220452	0.342317	0.00583833	-0.106293	0.0385576	0.000116614	1.09118e-05	0.00581285	1	0.140732
rs4132670	10:114767771	A:0.397355	rs7899529	10:114779538	G:0.452793	17921	6642	5	1	0.00595307	1.01791e-13	0.279707	0.0376023	0.0817074	0.0642587	0.036912	1.89733e-08	0.232389	0.0413422	0.536698	0.0245079	0.0396687	0.00593964	0.111836	0.0406514	1.51332e-18	2.63185e-19	0.00595307	1	0.140732
rs6436602	2:227005350	G:0.365344	rs7904519	10:114773927	A:0.450083	18020	6681	5	1	0.00595307	2.87852e-05	0.110824	0.0264948	7.65918e-08	-0.138284	0.0257273	2.03339e-06	0.203132	0.0427639	0.0946773	-0.0628158	0.0375867	0.00598408	-0.0940685	0.0342235	8.19748e-11	1.11455e-11	0.00595307	1	0.140732
rs12255372	10:114808902	T:0.284691	rs4919764	12:53272051	G:0.428314	18016	6686	5	1	0.00598542	7.34841e-16	0.217881	0.027017	3.55501e-06	0.118355	0.0255304	4.50495e-13	0.308473	0.0426099	1.18189e-07	0.179786	0.0339458	0.00599056	-0.104063	0.0378645	1.03083e-19	1.85351e-20	0.00598542	1	0.140732
rs1522812	2:226997454	A:0.360559	chr10:114772253:i	10:114772253	C:0.449203	17875	6603	5	1	0.00601142	5.01747e-05	0.108273	0.0267024	1.31442e-07	-0.136549	0.025877	3.05393e-06	0.201394	0.0431512	0.101473	-0.0615584	0.0375871	0.00604329	-0.0947971	0.0345291	2.38363e-10	3.20599e-11	0.00601142	1	0.140732
rs12255372	10:114808902	T:0.285151	rs11158715	14:68489386	T:0.306225	18008	6686	5	1	0.00601794	3.11548e-16	0.220654	0.0270119	0.00017345	0.108753	0.0289634	1.93473e-15	0.286038	0.0360002	3.30902e-06	0.171201	0.0368124	0.00602605	-0.105379	0.0383705	3.28608e-18	5.72131e-19	0.00601794	1	0.140732
rs1522812	2:226997454	A:0.360461	rs6585202	10:114782803	T:0.46188	17891	6622	5	1	0.00608354	4.03937e-05	0.109433	0.0266571	1.59136e-07	-0.133549	0.0254784	2.7435e-06	0.203053	0.0433027	0.0989235	-0.0606871	0.0367779	0.00611411	-0.09407	0.0343121	2.37202e-10	3.22448e-11	0.00608354	1	0.140732
rs74987670	10:112820864	G:0.0596836	rs6585200	10:114768609	A:0.454322	17886	6636	5	1	0.00610336	9.9119e-06	-0.2377	0.0537894	1.63127e-08	-0.14616	0.025882	1.06538e-06	-0.418164	0.0857042	5.88422e-10	-0.167513	0.0270466	0.00606464	0.200931	0.0732184	4.54412e-12	6.6347e-13	0.00610336	1	0.140732
rs4132670	10:114767771	A:0.397234	rs10885406	10:114777724	A:0.452368	17929	6644	5	1	0.00610336	1.72707e-13	0.276685	0.0375503	0.105637	0.0596251	0.0368484	2.6794e-08	0.229583	0.041283	0.612725	0.0200458	0.0396015	0.00608476	0.111589	0.0406788	1.60778e-18	2.85705e-19	0.00610336	1	0.140732
rs1522812	2:226997454	A:0.360364	rs7899529	10:114779538	G:0.452607	17893	6611	5	1	0.00610998	3.87207e-05	0.109728	0.0266655	3.21393e-07	-0.131629	0.0257568	2.61713e-06	0.202769	0.0431536	0.122516	-0.057586	0.0372894	0.00613585	-0.0942851	0.0344052	4.48375e-10	6.0457e-11	0.00610998	1	0.140732
rs2353696	16:19505813	T:0.33869	rs2856611	16:19507199	G:0.338745	18077	6704	5	1	0.00611661	0.45349	-0.48537	0.647498	0.565299	0.372333	0.647548	0.557236	-0.380886	0.648923	0.490215	0.447402	0.648441	0.00614586	-0.105527	0.038515	0.000107325	1.05284e-05	0.00611661	1	0.140732
rs6436602	2:227005350	G:0.364405	rs1967951	16:19503773	T:0.338558	18087	6705	5	1	0.00612989	4.45378e-05	0.108046	0.026465	3.51975e-05	-0.111029	0.0268385	0.140327	0.0500093	0.0339143	1.06744e-06	-0.181173	0.0371349	0.00613003	0.0987386	0.0360262	4.28389e-08	5.26599e-09	0.00612989	1	0.140732
rs7821832	8:25889446	G:0.302338	rs4132670	10:114767771	A:0.396359	17879	6599	5	1	0.00614319	0.000421546	-0.0975366	0.0276604	6.62661e-19	0.233466	0.0262883	0.734887	-0.0139207	0.0411087	9.64658e-18	0.293181	0.0341779	0.00615982	-0.0997902	0.0364311	8.26558e-21	1.56018e-21	0.00614319	1	0.140732
rs7821832	8:25889446	G:0.302475	rs11158715	14:68489386	T:0.305548	17899	6617	5	1	0.00615653	0.000403722	-0.0976616	0.0276064	0.000142484	0.110503	0.0290505	0.413848	-0.0301812	0.0369351	2.82218e-06	0.173791	0.0371083	0.00619603	-0.102561	0.0374691	1.16011e-06	1.31821e-07	0.00615653	1	0.140732
rs74987670	10:112820864	G:0.0595052	rs621010	11:102353911	G:0.133754	17906	6637	5	1	0.00621692	1.95277e-05	-0.229383	0.053717	0.104326	-0.0606578	0.0373455	0.0123312	-0.151477	0.0605299	0.500701	-0.0264966	0.0393482	0.00710586	-0.311614	0.115762	2.56417e-05	2.67978e-06	0.00621692	1	0.140732
rs6436602	2:227005350	G:0.36446	rs2521791	16:19508824	C:0.338822	18098	6713	5	1	0.00623042	4.23076e-05	0.10831	0.0264525	3.02669e-05	-0.111911	0.0268279	0.136741	0.0504364	0.0338946	9.59476e-07	-0.181887	0.0371215	0.00623705	0.0984435	0.0359933	3.55147e-08	4.44769e-09	0.00623042	1	0.140732
rs6436602	2:227005350	G:0.365047	rs4132670	10:114767771	A:0.397576	17984	6665	5	1	0.00624395	4.67898e-05	0.10818	0.0265726	7.98176e-19	0.231965	0.0261804	0.280563	0.0394982	0.0366044	1.22238e-05	0.161055	0.0368248	0.00626724	0.0950403	0.0347692	1.61808e-21	3.14804e-22	0.00624395	1	0.140732
rs6436602	2:227005350	G:0.36448	rs2187660	16:19508583	C:0.338813	18097	6713	5	1	0.00624395	4.25256e-05	0.108277	0.0264522	3.01852e-05	-0.111926	0.0268274	0.136928	0.0504119	0.0338942	9.58383e-07	-0.18189	0.0371204	0.00624342	0.0984296	0.0359926	3.55841e-08	4.4647e-09	0.00624395	1	0.140732
rs6436602	2:227005350	G:0.36448	rs2187659	16:19508573	A:0.338813	18097	6713	5	1	0.00624395	4.25256e-05	0.108277	0.0264522	3.01852e-05	-0.111926	0.0268274	0.136928	0.0504119	0.0338942	9.58383e-07	-0.18189	0.0371204	0.00624342	0.0984296	0.0359926	3.55841e-08	4.4647e-09	0.00624395	1	0.140732
rs1522812	2:226997454	A:0.36026	rs12258200	10:114781698	T:0.449634	17919	6627	5	1	0.00638786	3.91329e-05	0.109617	0.0266544	7.49176e-08	-0.138986	0.0258389	2.76597e-06	0.201893	0.0430706	0.0838593	-0.0648053	0.0374874	0.00641587	-0.093899	0.0344491	1.09344e-10	1.57412e-11	0.00638786	1	0.140732
rs1562692	3:34534267	G:0.121372	rs4646362	17:17468641	C:0.496179	18056	6701	5	1	0.00639479	5.9594e-05	0.220473	0.0549203	1.77745e-06	-0.174446	0.0365162	1.19054e-06	0.319495	0.0657775	0.000291676	-0.13987	0.0386105	0.00648264	-0.116262	0.0427072	4.76898e-09	6.3854e-10	0.00639479	1	0.140732
rs7708975	5:132650567	T:0.0958079	rs7821832	8:25889446	G:0.302471	18010	6650	5	1	0.00640174	0.000130768	-0.164902	0.0431115	0.000196623	-0.102455	0.0275171	0.361593	-0.053922	0.0591034	0.0207578	-0.069454	0.030036	0.00656193	-0.168787	0.062093	6.48228e-07	7.74177e-08	0.00640174	1	0.140732
rs6573817	14:68617269	G:0.318915	rs8011527	14:68638685	A:0.319305	17975	6667	5	1	0.00641565	0.973595	-0.014912	0.450511	0.774447	0.12918	0.450789	0.805864	0.111198	0.452454	0.678414	0.186938	0.450858	0.00639849	-0.109051	0.0399948	0.000938076	8.80703e-05	0.00641565	1	0.140732
rs2856608	16:19505751	G:0.336056	rs2521793	16:19511391	C:0.341103	17933	6647	5	1	0.00643657	0.852418	-0.0287335	0.154453	0.580312	-0.0853882	0.154429	0.511728	0.106477	0.162275	0.792438	-0.0408826	0.155361	0.00646977	-0.105916	0.0388971	0.000125721	1.28169e-05	0.00643657	1	0.140732
rs1967951	16:19503773	T:0.338303	rs2856608	16:19505751	G:0.335067	18077	6700	5	1	0.00646458	0.936706	-0.0166773	0.210014	0.651151	-0.0949018	0.209884	0.928647	0.0188773	0.210808	0.82259	0.048601	0.216761	0.00649643	-0.10555	0.0387823	0.000170836	1.72845e-05	0.00646458	1	0.140732
rs1522812	2:226997454	A:0.360155	rs12255372	10:114808902	T:0.285003	17977	6641	5	1	0.00648567	3.87615e-05	0.109785	0.0266809	3.09858e-16	0.221017	0.0270542	0.143765	0.0504299	0.0344958	0.00016018	0.145906	0.0386533	0.00651292	0.102478	0.0376652	6.78121e-19	1.28397e-19	0.00648567	1	0.140732
rs1522812	2:226997454	A:0.36022	rs11196191	10:114780633	A:0.449528	17921	6628	5	1	0.00649977	3.85876e-05	0.109721	0.0266587	7.38994e-08	-0.139044	0.0258378	2.80002e-06	0.201789	0.0430717	0.0828217	-0.0650232	0.0374872	0.00653223	-0.093695	0.0344493	1.06707e-10	1.56059e-11	0.00649977	1	0.140732
rs6436602	2:227005350	G:0.364395	rs2856614	16:19512116	T:0.338943	18093	6707	5	1	0.0066065	4.3114e-05	0.108225	0.02646	3.80443e-05	-0.11053	0.0268338	0.135124	0.0506792	0.0339173	1.24114e-06	-0.180028	0.0371273	0.00660602	0.0977907	0.0360044	4.49386e-08	5.89345e-09	0.0066065	1	0.140732
rs6436602	2:227005350	G:0.364395	rs1134662	16:19510249	G:0.338943	18093	6707	5	1	0.0066065	4.3114e-05	0.108225	0.02646	3.80443e-05	-0.11053	0.0268338	0.135124	0.0506792	0.0339173	1.24114e-06	-0.180028	0.0371273	0.00660602	0.0977907	0.0360044	4.49386e-08	5.89345e-09	0.0066065	1	0.140732
rs1522812	2:226997454	A:0.360026	rs117537110	6:30649931	G:0.448675	17964	6634	5	1	0.0066714	4.0744e-05	0.109355	0.0266511	8.24296e-07	0.607542	0.123246	0.0774378	0.0577906	0.0327286	1.48691e-05	0.543201	0.125433	0.00666176	0.074709	0.0275344	1.0777e-09	1.54385e-10	0.0066714	1	0.140732
rs1522812	2:226997454	A:0.36017	rs6585199	10:114765171	G:0.456533	17818	6588	5	1	0.00672232	4.03932e-05	0.109826	0.0267528	1.51142e-08	-0.146278	0.0258429	3.1259e-06	0.202774	0.0434917	0.0508405	-0.072985	0.0373741	0.00674986	-0.0935447	0.0345319	2.14891e-11	3.33022e-12	0.00672232	1	0.140732
rs10885405	10:114777670	C:0.461468	rs4148427	13:95925674	T:0.251929	18011	6680	5	1	0.00673695	1.61233e-07	-0.133062	0.0253971	7.39526e-06	-0.157504	0.0351415	0.00187192	-0.0919658	0.0295726	0.0481446	-0.0865636	0.0438055	0.00680058	-0.0817333	0.0301994	4.10588e-11	6.3042e-12	0.00673695	1	0.140732
rs2245423	16:19505730	T:0.338967	rs4421962	16:19505852	C:0.338967	18105	6715	5	1	0.00675894	2.46702e-05	-0.113036	0.0267998	3.29444e-83			0.363489	0.0642344	0.0706855	3.29444e-83			0.00679106	-0.10413	0.0384681	2.37113e-05	3.37004e-06	0.00675894	1	0.140732
rs1475963	16:19505282	G:0.338967	rs1475964	16:19505406	T:0.338967	18105	6715	5	1	0.00675894	2.46702e-05	-0.113036	0.0267998	3.29444e-83			0.363489	0.0642344	0.0706855	3.29444e-83			0.00679106	-0.10413	0.0384681	2.37113e-05	3.37004e-06	0.00675894	1	0.140732
rs1475963	16:19505282	G:0.338967	rs2245423	16:19505730	T:0.338967	18105	6715	5	1	0.00675894	2.46702e-05	-0.113036	0.0267998	3.29444e-83			0.363489	0.0642344	0.0706855	3.29444e-83			0.00679106	-0.10413	0.0384681	2.37113e-05	3.37004e-06	0.00675894	1	0.140732
rs1475963	16:19505282	G:0.338967	rs4421962	16:19505852	C:0.338967	18105	6715	5	1	0.00675894	2.46702e-05	-0.113036	0.0267998	3.29444e-83			0.363489	0.0642344	0.0706855	3.29444e-83			0.00679106	-0.10413	0.0384681	2.37113e-05	3.37004e-06	0.00675894	1	0.140732
rs1475964	16:19505406	T:0.338967	rs2245423	16:19505730	T:0.338967	18105	6715	5	1	0.00675894	2.46702e-05	-0.113036	0.0267998	3.29444e-83			0.363489	0.0642344	0.0706855	3.29444e-83			0.00679106	-0.10413	0.0384681	2.37113e-05	3.37004e-06	0.00675894	1	0.140732
rs1475964	16:19505406	T:0.338967	rs4421962	16:19505852	C:0.338967	18105	6715	5	1	0.00675894	2.46702e-05	-0.113036	0.0267998	3.29444e-83			0.363489	0.0642344	0.0706855	3.29444e-83			0.00679106	-0.10413	0.0384681	2.37113e-05	3.37004e-06	0.00675894	1	0.140732
rs599136	10:112823415	A:0.0599944	rs6585199	10:114765171	G:0.457335	17860	6627	5	1	0.00678838	1.22119e-05	-0.234751	0.0536724	2.37339e-08	-0.143987	0.0257935	1.42812e-06	-0.412961	0.0856582	9.05556e-10	-0.165282	0.0269838	0.00675657	0.197855	0.0730466	8.14042e-12	1.29346e-12	0.00678838	1	0.140732
rs1522812	2:226997454	A:0.360375	rs6585201	10:114768783	G:0.466732	17855	6595	5	1	0.00680315	4.87357e-05	0.108557	0.0267275	1.55189e-08	-0.144565	0.0255609	3.7452e-06	0.202188	0.0437158	0.0498351	-0.0723946	0.0369101	0.00683343	-0.0930805	0.0344124	2.7006e-11	4.21305e-12	0.00680315	1	0.140732
rs1967952	16:19503828	T:0.338977	rs1475964	16:19505406	T:0.338977	18103	6713	5	1	0.00682537	2.56526e-05	-0.112801	0.0268	3.29444e-83			0.36321	0.0642752	0.0706892	3.29444e-83			0.00685523	-0.104015	0.0384701	2.46545e-05	3.52832e-06	0.00682537	1	0.140732
rs1475962	16:19503598	C:0.338977	rs1475963	16:19505282	G:0.338977	18103	6713	5	1	0.00682537	2.56526e-05	-0.112801	0.0268	3.29444e-83			0.36321	0.0642752	0.0706892	3.29444e-83			0.00685523	-0.104015	0.0384701	2.46545e-05	3.52832e-06	0.00682537	1	0.140732
rs1475962	16:19503598	C:0.338977	rs1475964	16:19505406	T:0.338977	18103	6713	5	1	0.00682537	2.56526e-05	-0.112801	0.0268	3.29444e-83			0.36321	0.0642752	0.0706892	3.29444e-83			0.00685523	-0.104015	0.0384701	2.46545e-05	3.52832e-06	0.00682537	1	0.140732
rs1475962	16:19503598	C:0.338977	rs2245423	16:19505730	T:0.338977	18103	6713	5	1	0.00682537	2.56526e-05	-0.112801	0.0268	3.29444e-83			0.36321	0.0642752	0.0706892	3.29444e-83			0.00685523	-0.104015	0.0384701	2.46545e-05	3.52832e-06	0.00682537	1	0.140732
rs1475962	16:19503598	C:0.338977	rs4421962	16:19505852	C:0.338977	18103	6713	5	1	0.00682537	2.56526e-05	-0.112801	0.0268	3.29444e-83			0.36321	0.0642752	0.0706892	3.29444e-83			0.00685523	-0.104015	0.0384701	2.46545e-05	3.52832e-06	0.00682537	1	0.140732
rs1967952	16:19503828	T:0.338977	rs4421962	16:19505852	C:0.338977	18103	6713	5	1	0.00682537	2.56526e-05	-0.112801	0.0268	3.29444e-83			0.36321	0.0642752	0.0706892	3.29444e-83			0.00685523	-0.104015	0.0384701	2.46545e-05	3.52832e-06	0.00682537	1	0.140732
rs1967952	16:19503828	T:0.338977	rs2245423	16:19505730	T:0.338977	18103	6713	5	1	0.00682537	2.56526e-05	-0.112801	0.0268	3.29444e-83			0.36321	0.0642752	0.0706892	3.29444e-83			0.00685523	-0.104015	0.0384701	2.46545e-05	3.52832e-06	0.00682537	1	0.140732
rs1967952	16:19503828	T:0.338977	rs1475963	16:19505282	G:0.338977	18103	6713	5	1	0.00682537	2.56526e-05	-0.112801	0.0268	3.29444e-83			0.36321	0.0642752	0.0706892	3.29444e-83			0.00685523	-0.104015	0.0384701	2.46545e-05	3.52832e-06	0.00682537	1	0.140732
rs6436602	2:227005350	G:0.364453	rs2856610	16:19507031	T:0.338868	18097	6710	5	1	0.00684766	4.35162e-05	0.108159	0.026458	2.54403e-05	-0.112967	0.0268276	0.133065	0.0509259	0.0339026	9.25355e-07	-0.182149	0.037121	0.00685095	0.0973403	0.0359986	3.07955e-08	4.2042e-09	0.00684766	1	0.140732
rs6436602	2:227005350	G:0.364453	rs2856609	16:19506773	G:0.338868	18097	6710	5	1	0.00684766	4.35162e-05	0.108159	0.026458	2.54403e-05	-0.112967	0.0268276	0.133065	0.0509259	0.0339026	9.25355e-07	-0.182149	0.037121	0.00685095	0.0973403	0.0359986	3.07955e-08	4.2042e-09	0.00684766	1	0.140732
rs1475962	16:19503598	C:0.338986	rs1967952	16:19503828	T:0.338986	18104	6713	5	1	0.0068775	2.54053e-05	-0.11286	0.0268002	3.29444e-83			0.365021	0.0640321	0.0706882	3.29444e-83			0.0069124	-0.103909	0.03847	2.44027e-05	3.518e-06	0.0068775	1	0.140732
rs599136	10:112823415	A:0.0601743	rs6585201	10:114768783	G:0.467482	17898	6635	5	1	0.00688498	1.55682e-05	-0.231182	0.0535083	2.53032e-08	-0.142134	0.0255125	2.05738e-06	-0.416617	0.0877512	9.31849e-10	-0.163749	0.0267535	0.00687372	0.199047	0.0736419	9.94467e-12	1.59468e-12	0.00688498	1	0.140732
rs4421962	16:19505852	C:0.339055	rs2856614	16:19512116	T:0.338944	18090	6708	5	1	0.00699057	0.495066	-0.729701	1.06951	0.562846	0.618873	1.06957	0.517406	-0.691745	1.06858	0.478864	0.757546	1.06978	0.00701569	-0.103766	0.0384873	0.000154037	1.67408e-05	0.00699057	1	0.140732
rs4421962	16:19505852	C:0.339055	rs1134662	16:19510249	G:0.338944	18090	6708	5	1	0.00699057	0.495066	-0.729701	1.06951	0.562846	0.618873	1.06957	0.517406	-0.691745	1.06858	0.478864	0.757546	1.06978	0.00701569	-0.103766	0.0384873	0.000154037	1.67408e-05	0.00699057	1	0.140732
rs2245423	16:19505730	T:0.339055	rs2856614	16:19512116	T:0.338944	18090	6708	5	1	0.00699057	0.495066	-0.729701	1.06951	0.562846	0.618873	1.06957	0.517406	-0.691745	1.06858	0.478864	0.757546	1.06978	0.00701569	-0.103766	0.0384873	0.000154037	1.67408e-05	0.00699057	1	0.140732
rs2245423	16:19505730	T:0.339055	rs1134662	16:19510249	G:0.338944	18090	6708	5	1	0.00699057	0.495066	-0.729701	1.06951	0.562846	0.618873	1.06957	0.517406	-0.691745	1.06858	0.478864	0.757546	1.06978	0.00701569	-0.103766	0.0384873	0.000154037	1.67408e-05	0.00699057	1	0.140732
rs1475963	16:19505282	G:0.339055	rs2856614	16:19512116	T:0.338944	18090	6708	5	1	0.00699057	0.495066	-0.729701	1.06951	0.562846	0.618873	1.06957	0.517406	-0.691745	1.06858	0.478864	0.757546	1.06978	0.00701569	-0.103766	0.0384873	0.000154037	1.67408e-05	0.00699057	1	0.140732
rs1475963	16:19505282	G:0.339055	rs1134662	16:19510249	G:0.338944	18090	6708	5	1	0.00699057	0.495066	-0.729701	1.06951	0.562846	0.618873	1.06957	0.517406	-0.691745	1.06858	0.478864	0.757546	1.06978	0.00701569	-0.103766	0.0384873	0.000154037	1.67408e-05	0.00699057	1	0.140732
rs1475964	16:19505406	T:0.339055	rs1134662	16:19510249	G:0.338944	18090	6708	5	1	0.00699057	0.495066	-0.729701	1.06951	0.562846	0.618873	1.06957	0.517406	-0.691745	1.06858	0.478864	0.757546	1.06978	0.00701569	-0.103766	0.0384873	0.000154037	1.67408e-05	0.00699057	1	0.140732
rs1475964	16:19505406	T:0.339055	rs2856614	16:19512116	T:0.338944	18090	6708	5	1	0.00699057	0.495066	-0.729701	1.06951	0.562846	0.618873	1.06957	0.517406	-0.691745	1.06858	0.478864	0.757546	1.06978	0.00701569	-0.103766	0.0384873	0.000154037	1.67408e-05	0.00699057	1	0.140732
rs2856611	16:19507199	G:0.339376	rs2521793	16:19511391	C:0.341078	17927	6648	5	1	0.00700579	0.79642	0.0553188	0.214428	0.431916	-0.168353	0.214213	0.430445	0.172224	0.218439	0.615178	-0.108102	0.215044	0.00704284	-0.104126	0.0386394	0.000126831	1.39099e-05	0.00700579	1	0.140732
rs6585199	10:114765171	G:0.456901	rs4132670	10:114767771	A:0.398014	17924	6642	5	1	0.00702104	0.249989	0.0432091	0.0375609	3.28262e-12	0.265983	0.0381882	0.894207	0.00533732	0.0401354	1.27752e-07	0.220502	0.0417455	0.0070083	0.109733	0.0406955	2.32791e-18	4.66658e-19	0.00702104	1	0.140732
rs1475962	16:19503598	C:0.339065	rs2856614	16:19512116	T:0.338954	18088	6706	5	1	0.00705165	0.495205	-0.729396	1.06941	0.562853	0.618804	1.06947	0.51752	-0.691493	1.06848	0.478946	0.757338	1.06969	0.00708117	-0.103652	0.0384893	0.000159704	1.74642e-05	0.00705165	1	0.140732
rs1475962	16:19503598	C:0.339065	rs1134662	16:19510249	G:0.338954	18088	6706	5	1	0.00705165	0.495205	-0.729396	1.06941	0.562853	0.618804	1.06947	0.51752	-0.691493	1.06848	0.478946	0.757338	1.06969	0.00708117	-0.103652	0.0384893	0.000159704	1.74642e-05	0.00705165	1	0.140732
rs1967952	16:19503828	T:0.339065	rs2856614	16:19512116	T:0.338954	18088	6706	5	1	0.00705165	0.495205	-0.729396	1.06941	0.562853	0.618804	1.06947	0.51752	-0.691493	1.06848	0.478946	0.757338	1.06969	0.00708117	-0.103652	0.0384893	0.000159704	1.74642e-05	0.00705165	1	0.140732
rs1967952	16:19503828	T:0.339065	rs1134662	16:19510249	G:0.338954	18088	6706	5	1	0.00705165	0.495205	-0.729396	1.06941	0.562853	0.618804	1.06947	0.51752	-0.691493	1.06848	0.478946	0.757338	1.06969	0.00708117	-0.103652	0.0384893	0.000159704	1.74642e-05	0.00705165	1	0.140732
rs6436602	2:227005350	G:0.364488	rs1475962	16:19503598	C:0.338932	18098	6709	5	1	0.0070901	4.65359e-05	0.107735	0.0264552	2.46776e-05	-0.113148	0.0268267	0.134459	0.050743	0.0339022	9.40435e-07	-0.182032	0.0371213	0.00709763	0.0969096	0.035996	3.1991e-08	4.49891e-09	0.0070901	1	0.140732
rs6436602	2:227005350	G:0.364488	rs1967952	16:19503828	T:0.338932	18098	6709	5	1	0.0070901	4.65359e-05	0.107735	0.0264552	2.46776e-05	-0.113148	0.0268267	0.134459	0.050743	0.0339022	9.40435e-07	-0.182032	0.0371213	0.00709763	0.0969096	0.035996	3.1991e-08	4.49891e-09	0.0070901	1	0.140732
rs74987670	10:112820864	G:0.0598045	rs6585201	10:114768783	G:0.467263	17900	6635	5	1	0.00709782	1.28885e-05	-0.234228	0.0536976	2.52526e-08	-0.14217	0.0255172	1.94885e-06	-0.421053	0.0884814	9.598e-10	-0.163543	0.0267403	0.00708376	0.199789	0.0741914	8.19626e-12	1.35448e-12	0.00709782	1	0.140732
rs6436602	2:227005350	G:0.36444	rs1475963	16:19505282	G:0.338914	18099	6711	5	1	0.00709782	4.57752e-05	0.107842	0.0264565	2.39858e-05	-0.113318	0.0268263	0.133574	0.0508581	0.0339019	9.18915e-07	-0.182198	0.0371208	0.00710029	0.0969063	0.0359965	3.05857e-08	4.30981e-09	0.00709782	1	0.140732
rs6436602	2:227005350	G:0.36444	rs1475964	16:19505406	T:0.338914	18099	6711	5	1	0.00709782	4.57752e-05	0.107842	0.0264565	2.39858e-05	-0.113318	0.0268263	0.133574	0.0508581	0.0339019	9.18915e-07	-0.182198	0.0371208	0.00710029	0.0969063	0.0359965	3.05857e-08	4.30981e-09	0.00709782	1	0.140732
rs6436602	2:227005350	G:0.36444	rs2245423	16:19505730	T:0.338914	18099	6711	5	1	0.00709782	4.57752e-05	0.107842	0.0264565	2.39858e-05	-0.113318	0.0268263	0.133574	0.0508581	0.0339019	9.18915e-07	-0.182198	0.0371208	0.00710029	0.0969063	0.0359965	3.05857e-08	4.30981e-09	0.00709782	1	0.140732
rs6436602	2:227005350	G:0.36444	rs4421962	16:19505852	C:0.338914	18099	6711	5	1	0.00709782	4.57752e-05	0.107842	0.0264565	2.39858e-05	-0.113318	0.0268263	0.133574	0.0508581	0.0339019	9.18915e-07	-0.182198	0.0371208	0.00710029	0.0969063	0.0359965	3.05857e-08	4.30981e-09	0.00709782	1	0.140732
rs2894593	2:227190317	T:0.383435	rs599136	10:112823415	A:0.0600444	18020	6681	5	1	0.00710554	4.23765e-06	-0.118904	0.0258522	1.70009e-05	-0.229627	0.053389	1.86487e-07	-0.142231	0.0272875	1.06681e-06	-0.380587	0.0780068	0.00694297	0.202894	0.0751578	1.85303e-09	2.77581e-10	0.00710554	1	0.140732
rs17866193	4:118392862	C:0.442324	rs12255372	10:114808902	T:0.284886	18023	6677	5	1	0.00712877	3.51319e-06	0.11818	0.0254792	6.0863e-16	0.218508	0.0270177	0.0717309	0.0601386	0.0333951	0.00242172	0.129557	0.0427166	0.00715352	0.100153	0.0372369	1.45655e-19	3.04895e-20	0.00712877	1	0.140732
rs2856609	16:19506773	G:0.339009	rs1134662	16:19510249	G:0.338954	18088	6707	5	1	0.00713653	0.308471	-1.45441	1.42808	0.346681	1.34404	1.42824	0.323608	-1.40982	1.42828	0.301842	1.47563	1.42919	0.00716281	-0.103499	0.0384872	0.000126707	1.41209e-05	0.00713653	1	0.140732
rs2856609	16:19506773	G:0.339009	rs2856614	16:19512116	T:0.338954	18088	6707	5	1	0.00713653	0.308471	-1.45441	1.42808	0.346681	1.34404	1.42824	0.323608	-1.40982	1.42828	0.301842	1.47563	1.42919	0.00716281	-0.103499	0.0384872	0.000126707	1.41209e-05	0.00713653	1	0.140732
rs2856610	16:19507031	T:0.339009	rs1134662	16:19510249	G:0.338954	18088	6707	5	1	0.00713653	0.308471	-1.45441	1.42808	0.346681	1.34404	1.42824	0.323608	-1.40982	1.42828	0.301842	1.47563	1.42919	0.00716281	-0.103499	0.0384872	0.000126707	1.41209e-05	0.00713653	1	0.140732
rs2856610	16:19507031	T:0.339009	rs2856614	16:19512116	T:0.338954	18088	6707	5	1	0.00713653	0.308471	-1.45441	1.42808	0.346681	1.34404	1.42824	0.323608	-1.40982	1.42828	0.301842	1.47563	1.42919	0.00716281	-0.103499	0.0384872	0.000126707	1.41209e-05	0.00713653	1	0.140732
rs2353696	16:19505813	T:0.33911	rs1134662	16:19510249	G:0.338944	18090	6708	5	1	0.00714429	0.25755	-1.07495	0.949433	0.310037	0.963832	0.949453	0.272893	-1.03959	0.948161	0.244703	1.10461	0.949537	0.00717935	-0.103472	0.0384883	9.78161e-05	1.1015e-05	0.00714429	1	0.140732
rs2353696	16:19505813	T:0.33911	rs2856614	16:19512116	T:0.338944	18090	6708	5	1	0.00714429	0.25755	-1.07495	0.949433	0.310037	0.963832	0.949453	0.272893	-1.03959	0.948161	0.244703	1.10461	0.949537	0.00717935	-0.103472	0.0384883	9.78161e-05	1.1015e-05	0.00714429	1	0.140732
rs1967951	16:19503773	T:0.338315	rs2856611	16:19507199	G:0.338509	18066	6699	5	1	0.00715207	0.71183	-0.226059	0.611963	0.850432	0.115433	0.612158	0.873054	-0.0984304	0.616035	0.789498	0.164092	0.614663	0.00718115	-0.10363	0.0385482	0.000188914	2.07801e-05	0.00715207	1	0.140732
rs1475963	16:19505282	G:0.338905	rs2187659	16:19508573	A:0.33885	18098	6714	5	1	0.00715986	0.990486	-0.0168986	1.41715	0.946517	-0.0950594	1.41708	0.991777	0.0146113	1.41764	0.972174	0.0494817	1.41854	0.00719093	-0.103431	0.0384807	0.000157228	1.74314e-05	0.00715986	1	0.140732
rs2245423	16:19505730	T:0.338905	rs2187660	16:19508583	C:0.33885	18098	6714	5	1	0.00715986	0.990486	-0.0168986	1.41715	0.946517	-0.0950594	1.41708	0.991777	0.0146113	1.41764	0.972174	0.0494817	1.41854	0.00719093	-0.103431	0.0384807	0.000157228	1.74314e-05	0.00715986	1	0.140732
rs2245423	16:19505730	T:0.338905	rs2187659	16:19508573	A:0.33885	18098	6714	5	1	0.00715986	0.990486	-0.0168986	1.41715	0.946517	-0.0950594	1.41708	0.991777	0.0146113	1.41764	0.972174	0.0494817	1.41854	0.00719093	-0.103431	0.0384807	0.000157228	1.74314e-05	0.00715986	1	0.140732
rs2245423	16:19505730	T:0.338905	rs2521791	16:19508824	C:0.33885	18098	6714	5	1	0.00715986	0.990486	-0.0168986	1.41715	0.946517	-0.0950594	1.41708	0.991777	0.0146113	1.41764	0.972174	0.0494817	1.41854	0.00719093	-0.103431	0.0384807	0.000157228	1.74314e-05	0.00715986	1	0.140732
rs4421962	16:19505852	C:0.338905	rs2521791	16:19508824	C:0.33885	18098	6714	5	1	0.00715986	0.990486	-0.0168986	1.41715	0.946517	-0.0950594	1.41708	0.991777	0.0146113	1.41764	0.972174	0.0494817	1.41854	0.00719093	-0.103431	0.0384807	0.000157228	1.74314e-05	0.00715986	1	0.140732
rs4421962	16:19505852	C:0.338905	rs2187660	16:19508583	C:0.33885	18098	6714	5	1	0.00715986	0.990486	-0.0168986	1.41715	0.946517	-0.0950594	1.41708	0.991777	0.0146113	1.41764	0.972174	0.0494817	1.41854	0.00719093	-0.103431	0.0384807	0.000157228	1.74314e-05	0.00715986	1	0.140732
rs4421962	16:19505852	C:0.338905	rs2187659	16:19508573	A:0.33885	18098	6714	5	1	0.00715986	0.990486	-0.0168986	1.41715	0.946517	-0.0950594	1.41708	0.991777	0.0146113	1.41764	0.972174	0.0494817	1.41854	0.00719093	-0.103431	0.0384807	0.000157228	1.74314e-05	0.00715986	1	0.140732
rs1475964	16:19505406	T:0.338905	rs2521791	16:19508824	C:0.33885	18098	6714	5	1	0.00715986	0.990486	-0.0168986	1.41715	0.946517	-0.0950594	1.41708	0.991777	0.0146113	1.41764	0.972174	0.0494817	1.41854	0.00719093	-0.103431	0.0384807	0.000157228	1.74314e-05	0.00715986	1	0.140732
rs1475964	16:19505406	T:0.338905	rs2187660	16:19508583	C:0.33885	18098	6714	5	1	0.00715986	0.990486	-0.0168986	1.41715	0.946517	-0.0950594	1.41708	0.991777	0.0146113	1.41764	0.972174	0.0494817	1.41854	0.00719093	-0.103431	0.0384807	0.000157228	1.74314e-05	0.00715986	1	0.140732
rs1475964	16:19505406	T:0.338905	rs2187659	16:19508573	A:0.33885	18098	6714	5	1	0.00715986	0.990486	-0.0168986	1.41715	0.946517	-0.0950594	1.41708	0.991777	0.0146113	1.41764	0.972174	0.0494817	1.41854	0.00719093	-0.103431	0.0384807	0.000157228	1.74314e-05	0.00715986	1	0.140732
rs1475963	16:19505282	G:0.338905	rs2187660	16:19508583	C:0.33885	18098	6714	5	1	0.00715986	0.990486	-0.0168986	1.41715	0.946517	-0.0950594	1.41708	0.991777	0.0146113	1.41764	0.972174	0.0494817	1.41854	0.00719093	-0.103431	0.0384807	0.000157228	1.74314e-05	0.00715986	1	0.140732
rs1475963	16:19505282	G:0.338905	rs2521791	16:19508824	C:0.33885	18098	6714	5	1	0.00715986	0.990486	-0.0168986	1.41715	0.946517	-0.0950594	1.41708	0.991777	0.0146113	1.41764	0.972174	0.0494817	1.41854	0.00719093	-0.103431	0.0384807	0.000157228	1.74314e-05	0.00715986	1	0.140732
rs1475962	16:19503598	C:0.338915	rs2187659	16:19508573	A:0.338859	18096	6712	5	1	0.00723031	0.990316	-0.0172002	1.41715	0.946819	-0.0945223	1.41708	0.991962	0.0142819	1.41765	0.971966	0.0498519	1.41855	0.00725854	-0.103316	0.0384827	0.000163172	1.82187e-05	0.00723031	1	0.140732
rs1475962	16:19503598	C:0.338915	rs2187660	16:19508583	C:0.338859	18096	6712	5	1	0.00723031	0.990316	-0.0172002	1.41715	0.946819	-0.0945223	1.41708	0.991962	0.0142819	1.41765	0.971966	0.0498519	1.41855	0.00725854	-0.103316	0.0384827	0.000163172	1.82187e-05	0.00723031	1	0.140732
rs1967952	16:19503828	T:0.338915	rs2521791	16:19508824	C:0.338859	18096	6712	5	1	0.00723031	0.990316	-0.0172002	1.41715	0.946819	-0.0945223	1.41708	0.991962	0.0142819	1.41765	0.971966	0.0498519	1.41855	0.00725854	-0.103316	0.0384827	0.000163172	1.82187e-05	0.00723031	1	0.140732
rs1967952	16:19503828	T:0.338915	rs2187660	16:19508583	C:0.338859	18096	6712	5	1	0.00723031	0.990316	-0.0172002	1.41715	0.946819	-0.0945223	1.41708	0.991962	0.0142819	1.41765	0.971966	0.0498519	1.41855	0.00725854	-0.103316	0.0384827	0.000163172	1.82187e-05	0.00723031	1	0.140732
rs1475962	16:19503598	C:0.338915	rs2521791	16:19508824	C:0.338859	18096	6712	5	1	0.00723031	0.990316	-0.0172002	1.41715	0.946819	-0.0945223	1.41708	0.991962	0.0142819	1.41765	0.971966	0.0498519	1.41855	0.00725854	-0.103316	0.0384827	0.000163172	1.82187e-05	0.00723031	1	0.140732
rs1967952	16:19503828	T:0.338915	rs2187659	16:19508573	A:0.338859	18096	6712	5	1	0.00723031	0.990316	-0.0172002	1.41715	0.946819	-0.0945223	1.41708	0.991962	0.0142819	1.41765	0.971966	0.0498519	1.41855	0.00725854	-0.103316	0.0384827	0.000163172	1.82187e-05	0.00723031	1	0.140732
rs2245423	16:19505730	T:0.338922	rs2856609	16:19506773	G:0.338922	18103	6714	5	1	0.00725395	2.61033e-05	-0.112699	0.026801	3.29444e-83			0.372282	0.063071	0.0706909	3.29444e-83			0.00727857	-0.103254	0.0384726	2.50628e-05	3.78534e-06	0.00725395	1	0.140732
rs4421962	16:19505852	C:0.338922	rs2856610	16:19507031	T:0.338922	18103	6714	5	1	0.00725395	2.61033e-05	-0.112699	0.026801	3.29444e-83			0.372282	0.063071	0.0706909	3.29444e-83			0.00727857	-0.103254	0.0384726	2.50628e-05	3.78534e-06	0.00725395	1	0.140732
rs4421962	16:19505852	C:0.338922	rs2856609	16:19506773	G:0.338922	18103	6714	5	1	0.00725395	2.61033e-05	-0.112699	0.026801	3.29444e-83			0.372282	0.063071	0.0706909	3.29444e-83			0.00727857	-0.103254	0.0384726	2.50628e-05	3.78534e-06	0.00725395	1	0.140732
rs2245423	16:19505730	T:0.338922	rs2856610	16:19507031	T:0.338922	18103	6714	5	1	0.00725395	2.61033e-05	-0.112699	0.026801	3.29444e-83			0.372282	0.063071	0.0706909	3.29444e-83			0.00727857	-0.103254	0.0384726	2.50628e-05	3.78534e-06	0.00725395	1	0.140732
rs1475963	16:19505282	G:0.338922	rs2856609	16:19506773	G:0.338922	18103	6714	5	1	0.00725395	2.61033e-05	-0.112699	0.026801	3.29444e-83			0.372282	0.063071	0.0706909	3.29444e-83			0.00727857	-0.103254	0.0384726	2.50628e-05	3.78534e-06	0.00725395	1	0.140732
rs1475963	16:19505282	G:0.338922	rs2856610	16:19507031	T:0.338922	18103	6714	5	1	0.00725395	2.61033e-05	-0.112699	0.026801	3.29444e-83			0.372282	0.063071	0.0706909	3.29444e-83			0.00727857	-0.103254	0.0384726	2.50628e-05	3.78534e-06	0.00725395	1	0.140732
rs1475964	16:19505406	T:0.338922	rs2856610	16:19507031	T:0.338922	18103	6714	5	1	0.00725395	2.61033e-05	-0.112699	0.026801	3.29444e-83			0.372282	0.063071	0.0706909	3.29444e-83			0.00727857	-0.103254	0.0384726	2.50628e-05	3.78534e-06	0.00725395	1	0.140732
rs1475964	16:19505406	T:0.338922	rs2856609	16:19506773	G:0.338922	18103	6714	5	1	0.00725395	2.61033e-05	-0.112699	0.026801	3.29444e-83			0.372282	0.063071	0.0706909	3.29444e-83			0.00727857	-0.103254	0.0384726	2.50628e-05	3.78534e-06	0.00725395	1	0.140732
rs2856609	16:19506773	G:0.338922	rs2856610	16:19507031	T:0.338922	18103	6714	5	1	0.00725395	2.61033e-05	-0.112699	0.026801	3.29444e-83			0.372282	0.063071	0.0706909	3.29444e-83			0.00727857	-0.103254	0.0384726	2.50628e-05	3.78534e-06	0.00725395	1	0.140732
rs74987670	10:112820864	G:0.0595991	rs6585199	10:114765171	G:0.457113	17861	6626	5	1	0.00726185	9.66774e-06	-0.238376	0.0538767	2.38676e-08	-0.143994	0.0257991	1.36557e-06	-0.417081	0.0863527	9.6165e-10	-0.164947	0.0269712	0.00722111	0.197673	0.0735808	6.50915e-12	1.10178e-12	0.00726185	1	0.140732
rs2856609	16:19506773	G:0.338859	rs2521791	16:19508824	C:0.338859	18096	6713	5	1	0.00726976	3.14015e-05	-0.111609	0.0268093	3.29444e-83			0.364615	0.0640959	0.0706986	3.29444e-83			0.0073046	-0.103227	0.0384799	3.02142e-05	4.53046e-06	0.00726976	1	0.140732
rs2856610	16:19507031	T:0.338859	rs2521791	16:19508824	C:0.338859	18096	6713	5	1	0.00726976	3.14015e-05	-0.111609	0.0268093	3.29444e-83			0.364615	0.0640959	0.0706986	3.29444e-83			0.0073046	-0.103227	0.0384799	3.02142e-05	4.53046e-06	0.00726976	1	0.140732
rs2856609	16:19506773	G:0.338859	rs2187660	16:19508583	C:0.338859	18096	6713	5	1	0.00726976	3.14015e-05	-0.111609	0.0268093	3.29444e-83			0.364615	0.0640959	0.0706986	3.29444e-83			0.0073046	-0.103227	0.0384799	3.02142e-05	4.53046e-06	0.00726976	1	0.140732
rs2856609	16:19506773	G:0.338859	rs2187659	16:19508573	A:0.338859	18096	6713	5	1	0.00726976	3.14015e-05	-0.111609	0.0268093	3.29444e-83			0.364615	0.0640959	0.0706986	3.29444e-83			0.0073046	-0.103227	0.0384799	3.02142e-05	4.53046e-06	0.00726976	1	0.140732
rs2856610	16:19507031	T:0.338859	rs2187659	16:19508573	A:0.338859	18096	6713	5	1	0.00726976	3.14015e-05	-0.111609	0.0268093	3.29444e-83			0.364615	0.0640959	0.0706986	3.29444e-83			0.0073046	-0.103227	0.0384799	3.02142e-05	4.53046e-06	0.00726976	1	0.140732
rs2856610	16:19507031	T:0.338859	rs2187660	16:19508583	C:0.338859	18096	6713	5	1	0.00726976	3.14015e-05	-0.111609	0.0268093	3.29444e-83			0.364615	0.0640959	0.0706986	3.29444e-83			0.0073046	-0.103227	0.0384799	3.02142e-05	4.53046e-06	0.00726976	1	0.140732
rs2353696	16:19505813	T:0.33896	rs2521791	16:19508824	C:0.33885	18098	6714	5	1	0.00730943	0.490768	-0.805749	1.1693	0.553106	0.693458	1.16918	0.506164	-0.777403	1.16934	0.472591	0.840706	1.17046	0.00734508	-0.103161	0.0384816	0.000120669	1.37538e-05	0.00730943	1	0.140732
rs2353696	16:19505813	T:0.33896	rs2187660	16:19508583	C:0.33885	18098	6714	5	1	0.00730943	0.490768	-0.805749	1.1693	0.553106	0.693458	1.16918	0.506164	-0.777403	1.16934	0.472591	0.840706	1.17046	0.00734508	-0.103161	0.0384816	0.000120669	1.37538e-05	0.00730943	1	0.140732
rs2353696	16:19505813	T:0.33896	rs2187659	16:19508573	A:0.33885	18098	6714	5	1	0.00730943	0.490768	-0.805749	1.1693	0.553106	0.693458	1.16918	0.506164	-0.777403	1.16934	0.472591	0.840706	1.17046	0.00734508	-0.103161	0.0384816	0.000120669	1.37538e-05	0.00730943	1	0.140732
rs1967952	16:19503828	T:0.338932	rs2856610	16:19507031	T:0.338932	18101	6712	5	1	0.00731739	2.714e-05	-0.112464	0.0268013	3.29444e-83			0.371999	0.0631116	0.0706946	3.29444e-83			0.0073469	-0.103139	0.0384746	2.60867e-05	3.96313e-06	0.00731739	1	0.140732
rs1967952	16:19503828	T:0.338932	rs2856609	16:19506773	G:0.338932	18101	6712	5	1	0.00731739	2.714e-05	-0.112464	0.0268013	3.29444e-83			0.371999	0.0631116	0.0706946	3.29444e-83			0.0073469	-0.103139	0.0384746	2.60867e-05	3.96313e-06	0.00731739	1	0.140732
rs1475962	16:19503598	C:0.338932	rs2856609	16:19506773	G:0.338932	18101	6712	5	1	0.00731739	2.714e-05	-0.112464	0.0268013	3.29444e-83			0.371999	0.0631116	0.0706946	3.29444e-83			0.0073469	-0.103139	0.0384746	2.60867e-05	3.96313e-06	0.00731739	1	0.140732
rs1475962	16:19503598	C:0.338932	rs2856610	16:19507031	T:0.338932	18101	6712	5	1	0.00731739	2.714e-05	-0.112464	0.0268013	3.29444e-83			0.371999	0.0631116	0.0706946	3.29444e-83			0.0073469	-0.103139	0.0384746	2.60867e-05	3.96313e-06	0.00731739	1	0.140732
rs2187660	16:19508583	C:0.339016	rs2856614	16:19512116	T:0.338961	18095	6711	5	1	0.00732535	0.30848	-1.4544	1.4281	0.346704	1.34399	1.42826	0.323557	-1.40998	1.4283	0.302014	1.47512	1.42921	0.00736059	-0.103127	0.038479	0.000125231	1.42811e-05	0.00732535	1	0.140732
rs2187659	16:19508573	A:0.339016	rs2856614	16:19512116	T:0.338961	18095	6711	5	1	0.00732535	0.30848	-1.4544	1.4281	0.346704	1.34399	1.42826	0.323557	-1.40998	1.4283	0.302014	1.47512	1.42921	0.00736059	-0.103127	0.038479	0.000125231	1.42811e-05	0.00732535	1	0.140732
rs2187660	16:19508583	C:0.339016	rs1134662	16:19510249	G:0.338961	18095	6711	5	1	0.00732535	0.30848	-1.4544	1.4281	0.346704	1.34399	1.42826	0.323557	-1.40998	1.4283	0.302014	1.47512	1.42921	0.00736059	-0.103127	0.038479	0.000125231	1.42811e-05	0.00732535	1	0.140732
rs2187659	16:19508573	A:0.339016	rs1134662	16:19510249	G:0.338961	18095	6711	5	1	0.00732535	0.30848	-1.4544	1.4281	0.346704	1.34399	1.42826	0.323557	-1.40998	1.4283	0.302014	1.47512	1.42921	0.00736059	-0.103127	0.038479	0.000125231	1.42811e-05	0.00732535	1	0.140732
rs6436602	2:227005350	G:0.36444	rs2353696	16:19505813	T:0.338969	18099	6711	5	1	0.00732535	4.57059e-05	0.107852	0.0264567	2.21681e-05	-0.113805	0.0268291	0.132146	0.0510579	0.03391	8.92948e-07	-0.182411	0.0371216	0.00732854	0.0965306	0.0359983	2.83701e-08	4.11685e-09	0.00732535	1	0.140732
rs4421962	16:19505852	C:0.339237	rs2074172	16:19529042	A:0.340124	18039	6690	5	1	0.00738139	0.666746	0.162199	0.376665	0.464974	-0.27533	0.376812	0.438511	0.294598	0.380269	0.538851	-0.232016	0.377537	0.00741399	-0.103165	0.0385281	0.00011707	1.34721e-05	0.00738139	1	0.140732
rs1475963	16:19505282	G:0.339237	rs2074172	16:19529042	A:0.340124	18039	6690	5	1	0.00738139	0.666746	0.162199	0.376665	0.464974	-0.27533	0.376812	0.438511	0.294598	0.380269	0.538851	-0.232016	0.377537	0.00741399	-0.103165	0.0385281	0.00011707	1.34721e-05	0.00738139	1	0.140732
rs1475964	16:19505406	T:0.339237	rs2074172	16:19529042	A:0.340124	18039	6690	5	1	0.00738139	0.666746	0.162199	0.376665	0.464974	-0.27533	0.376812	0.438511	0.294598	0.380269	0.538851	-0.232016	0.377537	0.00741399	-0.103165	0.0385281	0.00011707	1.34721e-05	0.00738139	1	0.140732
rs2245423	16:19505730	T:0.339237	rs2074172	16:19529042	A:0.340124	18039	6690	5	1	0.00738139	0.666746	0.162199	0.376665	0.464974	-0.27533	0.376812	0.438511	0.294598	0.380269	0.538851	-0.232016	0.377537	0.00741399	-0.103165	0.0385281	0.00011707	1.34721e-05	0.00738139	1	0.140732
rs2856609	16:19506773	G:0.339192	rs2074172	16:19529042	A:0.340134	18037	6689	5	1	0.00739748	0.652906	0.175999	0.391344	0.460741	-0.288793	0.391517	0.423982	0.316104	0.395362	0.518685	-0.253171	0.392286	0.00742773	-0.103178	0.0385418	0.000122929	1.41474e-05	0.00739748	1	0.140732
rs2856610	16:19507031	T:0.339192	rs2074172	16:19529042	A:0.340134	18037	6689	5	1	0.00739748	0.652906	0.175999	0.391344	0.460741	-0.288793	0.391517	0.423982	0.316104	0.395362	0.518685	-0.253171	0.392286	0.00742773	-0.103178	0.0385418	0.000122929	1.41474e-05	0.00739748	1	0.140732
rs2521791	16:19508824	C:0.339025	rs2856614	16:19512116	T:0.33897	18096	6711	5	1	0.00743786	0.308577	-1.45413	1.42812	0.346803	1.34374	1.42828	0.323634	-1.40978	1.42832	0.302188	1.47461	1.42923	0.00746718	-0.10294	0.0384784	0.000125598	1.45113e-05	0.00743786	1	0.140732
rs2521791	16:19508824	C:0.339025	rs1134662	16:19510249	G:0.33897	18096	6711	5	1	0.00743786	0.308577	-1.45413	1.42812	0.346803	1.34374	1.42828	0.323634	-1.40978	1.42832	0.302188	1.47461	1.42923	0.00746718	-0.10294	0.0384784	0.000125598	1.45113e-05	0.00743786	1	0.140732
rs599136	10:112823415	A:0.0600783	rs6585200	10:114768609	A:0.454571	17885	6637	5	1	0.00743786	1.22908e-05	-0.234294	0.0535852	1.55859e-08	-0.146322	0.0258748	1.52754e-06	-0.408343	0.0849369	6.26154e-10	-0.167271	0.0270503	0.00738696	0.194863	0.0727404	5.45988e-12	9.46644e-13	0.00743786	1	0.140732
rs1475962	16:19503598	C:0.339247	rs2074172	16:19529042	A:0.340134	18037	6688	5	1	0.00745407	0.667212	0.161956	0.376662	0.465752	-0.274847	0.376809	0.43909	0.294223	0.380266	0.539587	-0.231593	0.377533	0.00748249	-0.103051	0.0385301	0.000121615	1.40943e-05	0.00745407	1	0.140732
rs1967952	16:19503828	T:0.339247	rs2074172	16:19529042	A:0.340134	18037	6688	5	1	0.00745407	0.667212	0.161956	0.376662	0.465752	-0.274847	0.376809	0.43909	0.294223	0.380266	0.539587	-0.231593	0.377533	0.00748249	-0.103051	0.0385301	0.000121615	1.40943e-05	0.00745407	1	0.140732
rs2187660	16:19508583	C:0.338866	rs2521791	16:19508824	C:0.338866	18103	6717	5	1	0.00747846	3.10246e-05	-0.111647	0.0268009	3.29444e-83			0.369551	0.0634248	0.070683	3.29444e-83			0.00750563	-0.102855	0.0384717	2.9844e-05	4.59282e-06	0.00747846	1	0.140732
rs2187659	16:19508573	A:0.338866	rs2187660	16:19508583	C:0.338866	18103	6717	5	1	0.00747846	3.10246e-05	-0.111647	0.0268009	3.29444e-83			0.369551	0.0634248	0.070683	3.29444e-83			0.00750563	-0.102855	0.0384717	2.9844e-05	4.59282e-06	0.00747846	1	0.140732
rs2187659	16:19508573	A:0.338866	rs2521791	16:19508824	C:0.338866	18103	6717	5	1	0.00747846	3.10246e-05	-0.111647	0.0268009	3.29444e-83			0.369551	0.0634248	0.070683	3.29444e-83			0.00750563	-0.102855	0.0384717	2.9844e-05	4.59282e-06	0.00747846	1	0.140732
rs4132670	10:114767771	A:0.397784	chr10:114772253:i	10:114772253	C:0.44959	17913	6638	5	1	0.00751111	8.3366e-13	0.268158	0.0374757	0.171005	0.0505757	0.036944	5.4602e-08	0.223229	0.0410677	0.743516	0.0129466	0.0395678	0.00749526	0.1096	0.0409871	4.18249e-18	8.84376e-19	0.00751111	1	0.140732
rs599136	10:112823415	A:0.060173	chr10:114772253:i	10:114772253	C:0.449986	17915	6641	5	1	0.00751929	1.68969e-05	-0.230123	0.0534874	2.03386e-07	-0.134211	0.0258286	1.90092e-06	-0.402887	0.0845748	9.21723e-09	-0.155145	0.0270074	0.00747553	0.194732	0.0728002	9.08265e-11	1.51488e-11	0.00751929	1	0.140732
rs2187659	16:19508573	A:0.339199	rs2074172	16:19529042	A:0.340141	18044	6693	5	1	0.00760164	0.652434	0.176254	0.391341	0.460277	-0.289089	0.391513	0.424354	0.315845	0.395355	0.517988	-0.25359	0.39228	0.0076325	-0.102804	0.0385335	0.000121259	1.42946e-05	0.00760164	1	0.141341
rs2187660	16:19508583	C:0.339199	rs2074172	16:19529042	A:0.340141	18044	6693	5	1	0.00760164	0.652434	0.176254	0.391341	0.460277	-0.289089	0.391513	0.424354	0.315845	0.395355	0.517988	-0.25359	0.39228	0.0076325	-0.102804	0.0385335	0.000121259	1.42946e-05	0.00760164	1	0.141341
rs2521791	16:19508824	C:0.339208	rs2074172	16:19529042	A:0.34015	18045	6693	5	1	0.00771008	0.652823	0.176048	0.391353	0.460636	-0.288867	0.391524	0.425061	0.315371	0.395365	0.518278	-0.253421	0.392291	0.00774373	-0.102615	0.0385329	0.000121734	1.4525e-05	0.00771008	1	0.141964
rs74987670	10:112820864	G:0.059488	rs7904519	10:114773927	A:0.45072	17928	6645	5	1	0.0077269	1.50801e-05	-0.23306	0.0538553	1.38856e-07	-0.135872	0.0257981	1.92023e-06	-0.409257	0.0859487	6.30173e-09	-0.156645	0.0269681	0.00766843	0.196141	0.0735622	5.41291e-11	9.33332e-12	0.0077269	1	0.141964
rs1134662	16:19510249	G:0.339179	rs2074172	16:19529042	A:0.340176	18048	6693	5	1	0.00773532	0.483354	0.283269	0.404139	0.327541	-0.395837	0.404296	0.295589	0.426659	0.407919	0.367714	-0.364526	0.404685	0.00777305	-0.10257	0.0385344	0.000106075	1.27567e-05	0.00773532	1	0.141964
rs2856614	16:19512116	T:0.339179	rs2074172	16:19529042	A:0.340176	18048	6693	5	1	0.00773532	0.483354	0.283269	0.404139	0.327541	-0.395837	0.404296	0.295589	0.426659	0.407919	0.367714	-0.364526	0.404685	0.00777305	-0.10257	0.0385344	0.000106075	1.27567e-05	0.00773532	1	0.141964
rs17866193	4:118392862	C:0.442434	rs10787472	10:114781297	A:0.453012	17962	6663	5	1	0.00784571	4.22617e-06	0.117184	0.0254752	3.18054e-07	-0.131314	0.0256854	6.90455e-07	0.200347	0.0403598	0.241502	-0.0475674	0.0406129	0.00787241	-0.0886501	0.0333585	4.66167e-11	8.16823e-12	0.00784571	1	0.143526
rs74987670	10:112820864	G:0.0596903	rs7918599	10:114777396	C:0.450198	17951	6657	5	1	0.00799249	1.72e-05	-0.230511	0.0536266	1.51895e-07	-0.135383	0.0257861	2.12758e-06	-0.403458	0.0851014	7.0822e-09	-0.156025	0.0269521	0.00794154	0.193588	0.072927	6.77607e-11	1.19883e-11	0.00799249	1	0.145741
rs1134662	16:19510249	G:0.338997	rs2856614	16:19512116	T:0.338997	18099	6711	5	1	0.00803619	3.90589e-05	-0.110258	0.0268073	3.29444e-83			0.371149	0.0632208	0.0706912	3.29444e-83			0.00807351	-0.10191	0.0384714	3.765e-05	6.10832e-06	0.00803619	1	0.146068
rs2353696	16:19505813	T:0.339293	rs2074172	16:19529042	A:0.340124	18039	6690	5	1	0.00820451	0.863049	0.0624542	0.362066	0.627418	-0.175788	0.362178	0.609337	0.186477	0.364911	0.727157	-0.126473	0.36248	0.00824028	-0.101759	0.0385151	0.000126707	1.59271e-05	0.00820451	1	0.148339
rs74987670	10:112820864	G:0.0596782	rs12258200	10:114781698	T:0.450175	17963	6666	5	1	0.00821347	1.44105e-05	-0.232591	0.0536232	1.11028e-07	-0.136903	0.0257935	1.97051e-06	-0.405435	0.0852395	5.19197e-09	-0.157447	0.0269559	0.00815212	0.193207	0.0730266	4.09787e-11	7.49256e-12	0.00821347	1	0.148339
rs74987670	10:112820864	G:0.0597272	rs11196191	10:114780633	A:0.45007	17965	6667	5	1	0.00825841	1.31094e-05	-0.233681	0.0536179	1.0834e-07	-0.137014	0.0257926	1.84844e-06	-0.406116	0.0851517	5.07175e-09	-0.157556	0.0269567	0.00819883	0.192955	0.0729846	3.69489e-11	6.80061e-12	0.00825841	1	0.148678
rs1555944	14:68625118	G:0.322175	rs8011527	14:68638685	A:0.320135	17894	6650	5	1	0.00839475	0.999846	-4.56321e-05	0.236559	0.633018	0.11335	0.237391	0.860795	0.0414232	0.236215	0.301804	0.249974	0.242088	0.00837254	-0.105411	0.0399791	0.00107341	0.00012618	0.00839475	1	0.149544
rs2972152	2:227066574	A:0.280122	rs7708975	5:132650567	T:0.0952951	17960	6668	5	1	0.00858949	1.08911e-06	-0.1354	0.0277754	0.000528814	-0.149551	0.0431515	3.76859e-08	-0.165736	0.0301264	1.4584e-05	-0.240476	0.0554748	0.00843016	0.177801	0.0674938	1.25769e-08	2.13666e-09	0.00858949	1	0.149544
rs1522812	2:226997454	A:0.36035	rs7918599	10:114777396	C:0.449662	17909	6620	5	1	0.00872189	4.43737e-05	0.108896	0.0266676	1.04039e-07	-0.137394	0.0258283	4.48361e-06	0.197669	0.0430876	0.0784317	-0.0659923	0.0374986	0.00875597	-0.0902582	0.0344308	1.71519e-10	3.22139e-11	0.00872189	1	0.149544
rs7483053	11:56340724	T:0.16925	rs4646362	17:17468641	C:0.496817	18065	6701	5	1	0.00874098	3.3627e-05	-0.139556	0.033649	1.72126e-06	-0.174521	0.0364827	2.13762e-06	-0.232294	0.0490076	7.85857e-08	-0.207373	0.0386144	0.00874583	0.0931516	0.0355292	1.59118e-09	2.86759e-10	0.00874098	1	0.149544
rs4421962	16:19505852	C:0.339648	rs2521793	16:19511391	C:0.341403	17948	6656	5	1	0.00876968	0.840188	0.0447994	0.222161	0.476667	-0.157963	0.22196	0.473717	0.162141	0.226314	0.643169	-0.103139	0.222632	0.00880752	-0.101128	0.0386069	0.000126583	1.68513e-05	0.00876968	1	0.149544
rs2245423	16:19505730	T:0.339648	rs2521793	16:19511391	C:0.341403	17948	6656	5	1	0.00876968	0.840188	0.0447994	0.222161	0.476667	-0.157963	0.22196	0.473717	0.162141	0.226314	0.643169	-0.103139	0.222632	0.00880752	-0.101128	0.0386069	0.000126583	1.68513e-05	0.00876968	1	0.149544
rs1475964	16:19505406	T:0.339648	rs2521793	16:19511391	C:0.341403	17948	6656	5	1	0.00876968	0.840188	0.0447994	0.222161	0.476667	-0.157963	0.22196	0.473717	0.162141	0.226314	0.643169	-0.103139	0.222632	0.00880752	-0.101128	0.0386069	0.000126583	1.68513e-05	0.00876968	1	0.149544
rs1475963	16:19505282	G:0.339648	rs2521793	16:19511391	C:0.341403	17948	6656	5	1	0.00876968	0.840188	0.0447994	0.222161	0.476667	-0.157963	0.22196	0.473717	0.162141	0.226314	0.643169	-0.103139	0.222632	0.00880752	-0.101128	0.0386069	0.000126583	1.68513e-05	0.00876968	1	0.149544
rs1475962	16:19503598	C:0.339658	rs2521793	16:19511391	C:0.341413	17946	6654	5	1	0.0088467	0.840313	0.0447628	0.222155	0.477427	-0.157688	0.221955	0.474158	0.161977	0.226309	0.643864	-0.102921	0.222628	0.0088847	-0.101018	0.0386088	0.000131497	1.76125e-05	0.0088467	1	0.149544
rs1967952	16:19503828	T:0.339658	rs2521793	16:19511391	C:0.341413	17946	6654	5	1	0.0088467	0.840313	0.0447628	0.222155	0.477427	-0.157688	0.221955	0.474158	0.161977	0.226309	0.643864	-0.102921	0.222628	0.0088847	-0.101018	0.0386088	0.000131497	1.76125e-05	0.0088467	1	0.149544
rs1967951	16:19503773	T:0.338603	rs4421962	16:19505852	C:0.338686	18092	6709	5	1	0.00885638	0.899074	-0.156142	1.2311	0.970567	0.0454322	1.2313	0.99651	-0.00539094	1.23244	0.957169	0.0661301	1.23132	0.00888724	-0.100731	0.0385003	0.000190768	2.52156e-05	0.00885638	1	0.149544
rs1967951	16:19503773	T:0.338603	rs2245423	16:19505730	T:0.338686	18092	6709	5	1	0.00885638	0.899074	-0.156142	1.2311	0.970567	0.0454322	1.2313	0.99651	-0.00539094	1.23244	0.957169	0.0661301	1.23132	0.00888724	-0.100731	0.0385003	0.000190768	2.52156e-05	0.00885638	1	0.149544
rs1967951	16:19503773	T:0.338603	rs1475964	16:19505406	T:0.338686	18092	6709	5	1	0.00885638	0.899074	-0.156142	1.2311	0.970567	0.0454322	1.2313	0.99651	-0.00539094	1.23244	0.957169	0.0661301	1.23132	0.00888724	-0.100731	0.0385003	0.000190768	2.52156e-05	0.00885638	1	0.149544
rs1967951	16:19503773	T:0.338603	rs1475963	16:19505282	G:0.338686	18092	6709	5	1	0.00885638	0.899074	-0.156142	1.2311	0.970567	0.0454322	1.2313	0.99651	-0.00539094	1.23244	0.957169	0.0661301	1.23132	0.00888724	-0.100731	0.0385003	0.000190768	2.52156e-05	0.00885638	1	0.149544
rs2856609	16:19506773	G:0.339602	rs2521793	16:19511391	C:0.341413	17946	6655	5	1	0.00886607	0.835523	0.0466993	0.224923	0.477836	-0.159512	0.224732	0.468857	0.166023	0.229206	0.635358	-0.106857	0.225342	0.00889777	-0.101019	0.0386165	0.000133699	1.79299e-05	0.00886607	1	0.149544
rs2856610	16:19507031	T:0.339602	rs2521793	16:19511391	C:0.341413	17946	6655	5	1	0.00886607	0.835523	0.0466993	0.224923	0.477836	-0.159512	0.224732	0.468857	0.166023	0.229206	0.635358	-0.106857	0.225342	0.00889777	-0.101019	0.0386165	0.000133699	1.79299e-05	0.00886607	1	0.149544
rs17866193	4:118392862	C:0.442271	chr10:114772253:i	10:114772253	C:0.449916	17920	6638	5	1	0.00888547	2.28516e-06	0.120658	0.0255284	2.59996e-07	-0.133075	0.0258381	5.26821e-07	0.202245	0.0403176	0.220066	-0.0501191	0.0408684	0.00891144	-0.0874533	0.0334374	2.02859e-11	4.02337e-12	0.00888547	1	0.149544
rs12288760	11:56333753	C:0.169174	rs4646362	17:17468641	C:0.49682	18079	6707	5	1	0.00889519	3.40577e-05	-0.13941	0.0336375	1.66576e-06	-0.174708	0.0364715	2.20286e-06	-0.231911	0.0489897	7.67713e-08	-0.20746	0.0386004	0.00889539	0.0929233	0.0355205	1.56958e-09	2.87309e-10	0.00889519	1	0.149544
rs1967951	16:19503773	T:0.338612	rs1967952	16:19503828	T:0.338695	18093	6709	5	1	0.00892442	0.899037	-0.1562	1.2311	0.970568	0.0454303	1.2313	0.996368	-0.00561068	1.23244	0.957184	0.0661065	1.23132	0.00895944	-0.100624	0.0385001	0.000189099	2.51683e-05	0.00892442	1	0.149544
rs1475962	16:19503598	C:0.338695	rs1967951	16:19503773	T:0.338612	18093	6709	5	1	0.00892442	0.970568	0.0454303	1.2313	0.899037	-0.1562	1.2311	0.957184	0.0661065	1.23132	0.996368	-0.00561068	1.23244	0.00895944	-0.100624	0.0385001	0.000189099	2.51683e-05	0.00892442	1	0.149544
rs17866193	4:118392862	C:0.442464	rs10787473	10:114781400	C:0.453102	17954	6658	5	1	0.00895374	5.53726e-06	0.115779	0.0254834	2.92959e-07	-0.131737	0.0256902	9.9109e-07	0.197606	0.0403822	0.224293	-0.0493673	0.0406251	0.00897789	-0.0871894	0.0333689	5.5684e-11	1.09233e-11	0.00895374	1	0.149544
rs6436602	2:227005350	G:0.364511	rs62026181	16:19506239	T:0.335987	18090	6709	5	1	0.00896353	4.077e-05	0.10857	0.0264607	4.05729e-05	-0.11009	0.0268239	0.114947	0.0533931	0.0338715	1.87832e-06	-0.177123	0.0371632	0.00896802	0.094291	0.0360816	4.56463e-08	7.81592e-09	0.00896353	1	0.149544
rs1967951	16:19503773	T:0.338603	rs2353696	16:19505813	T:0.338741	18092	6709	5	1	0.00900283	0.622735	0.472404	0.960214	0.543494	-0.58351	0.960451	0.518121	0.621772	0.962131	0.558705	-0.561785	0.960701	0.00903424	-0.10052	0.0385021	0.000158152	2.1354e-05	0.00900283	1	0.149544
rs4132670	10:114767771	A:0.39723	rs11196191	10:114780633	A:0.449785	17943	6658	5	1	0.00900283	1.03114e-12	0.264866	0.0371675	0.229552	0.0439839	0.0366071	7.44443e-08	0.220136	0.0409167	0.86948	0.00646654	0.0393537	0.00899119	0.106534	0.0407802	2.88301e-18	7.18576e-19	0.00900283	1	0.149544
rs4132670	10:114767771	A:0.397079	rs12258200	10:114781698	T:0.449891	17941	6657	5	1	0.0090423	8.38034e-13	0.265926	0.0371676	0.221625	0.0447403	0.0366059	6.44636e-08	0.221208	0.0409194	0.854115	0.00723603	0.0393539	0.00903431	0.106462	0.0407782	2.37382e-18	5.95239e-19	0.0090423	1	0.149544
rs17866193	4:118392862	C:0.442361	rs10885406	10:114777724	A:0.45292	17948	6648	5	1	0.00909189	4.66522e-06	0.116728	0.0254904	3.57309e-07	-0.130819	0.0256991	8.96532e-07	0.198337	0.0403691	0.232048	-0.0485711	0.0406419	0.00911225	-0.0870346	0.0333745	5.67823e-11	1.12854e-11	0.00909189	1	0.149544
rs2187660	16:19508583	C:0.339609	rs2521793	16:19511391	C:0.341419	17953	6659	5	1	0.00910184	0.834682	0.0469401	0.224916	0.477035	-0.159797	0.224725	0.469377	0.165823	0.229198	0.633812	-0.107343	0.225336	0.00914044	-0.100642	0.0386082	0.000132012	1.81162e-05	0.00910184	1	0.149544
rs2187659	16:19508573	A:0.339609	rs2521793	16:19511391	C:0.341419	17953	6659	5	1	0.00910184	0.834682	0.0469401	0.224916	0.477035	-0.159797	0.224725	0.469377	0.165823	0.229198	0.633812	-0.107343	0.225336	0.00914044	-0.100642	0.0386082	0.000132012	1.81162e-05	0.00910184	1	0.149544
rs11228658	11:56335596	T:0.169193	rs4646362	17:17468641	C:0.496847	18077	6706	5	1	0.00913176	3.48668e-05	-0.139231	0.0336381	1.70573e-06	-0.174542	0.0364731	2.31349e-06	-0.231427	0.0489905	7.99307e-08	-0.20719	0.0386024	0.00912554	0.0926131	0.0355205	1.6449e-09	3.07798e-10	0.00913176	1	0.149544
rs1522812	2:226997454	A:0.360113	rs6585200	10:114768609	A:0.453735	17843	6598	5	1	0.00921204	4.2277e-05	0.109471	0.0267349	1.04431e-08	-0.148404	0.0259296	4.8304e-06	0.198695	0.0434589	0.0395088	-0.0774085	0.037598	0.00925235	-0.0899522	0.0345626	1.60632e-11	3.30158e-12	0.00921204	1	0.149544
rs2521791	16:19508824	C:0.339618	rs2521793	16:19511391	C:0.341428	17954	6659	5	1	0.00923222	0.834625	0.0469574	0.224921	0.477038	-0.159799	0.22473	0.469927	0.165622	0.229203	0.633505	-0.107443	0.225341	0.00926841	-0.100457	0.0386076	0.000132399	1.83907e-05	0.00923222	1	0.149544
rs599136	10:112823415	A:0.0598995	rs621010	11:102353911	G:0.133762	17905	6638	5	1	0.00929304	2.4191e-05	-0.225962	0.0535174	0.107261	-0.0601449	0.0373425	0.0119972	-0.151747	0.0604033	0.484281	-0.0275321	0.0393634	0.0104289	-0.294159	0.114849	3.25093e-05	4.77525e-06	0.00929304	1	0.149544
rs7821832	8:25889446	G:0.302637	rs10885406	10:114777724	A:0.452883	17934	6620	5	1	0.0093134	0.000387681	-0.0978481	0.0275758	3.24202e-07	-0.131406	0.0257214	1.82794e-05	-0.180181	0.0420499	2.09307e-08	-0.185194	0.033046	0.0093059	0.0945726	0.0363656	2.50573e-09	4.72921e-10	0.0093134	1	0.149544
rs1967951	16:19503773	T:0.33854	rs2187659	16:19508573	A:0.338568	18085	6708	5	1	0.00933381	0.918256	-0.0949016	0.924692	0.987282	-0.0147418	0.924804	0.996684	0.00386271	0.929473	0.951305	0.0567451	0.929217	0.00936971	-0.100036	0.0385013	0.000227207	3.1203e-05	0.00933381	1	0.149544
rs1967951	16:19503773	T:0.33854	rs2187660	16:19508583	C:0.338568	18085	6708	5	1	0.00933381	0.918256	-0.0949016	0.924692	0.987282	-0.0147418	0.924804	0.996684	0.00386271	0.929473	0.951305	0.0567451	0.929217	0.00936971	-0.100036	0.0385013	0.000227207	3.1203e-05	0.00933381	1	0.149544
rs1967951	16:19503773	T:0.33854	rs2521791	16:19508824	C:0.338568	18085	6708	5	1	0.00933381	0.918256	-0.0949016	0.924692	0.987282	-0.0147418	0.924804	0.996684	0.00386271	0.929473	0.951305	0.0567451	0.929217	0.00936971	-0.100036	0.0385013	0.000227207	3.1203e-05	0.00933381	1	0.149544
rs17866193	4:118392862	C:0.442329	rs7899529	10:114779538	G:0.453311	17938	6646	5	1	0.00934403	4.4482e-06	0.117034	0.0255018	5.84333e-07	-0.128484	0.0257158	9.14617e-07	0.19858	0.0404508	0.253052	-0.0464873	0.0406724	0.00938108	-0.0867835	0.033406	8.75177e-11	1.76777e-11	0.00934403	1	0.149544
rs1967951	16:19503773	T:0.33869	rs1134662	16:19510249	G:0.338662	18077	6702	5	1	0.00941591	0.555308	-0.490653	0.831861	0.645973	0.382198	0.832017	0.625097	-0.409608	0.838261	0.574126	0.471251	0.838547	0.00944482	-0.0999423	0.0385057	0.000234878	3.2457e-05	0.00941591	1	0.149544
rs1967951	16:19503773	T:0.33869	rs2856614	16:19512116	T:0.338662	18077	6702	5	1	0.00941591	0.555308	-0.490653	0.831861	0.645973	0.382198	0.832017	0.625097	-0.409608	0.838261	0.574126	0.471251	0.838547	0.00944482	-0.0999423	0.0385057	0.000234878	3.2457e-05	0.00941591	1	0.149544
rs1522812	2:226997454	A:0.360557	rs4132670	10:114767771	A:0.3974	17846	6590	5	1	0.00942622	5.47413e-05	0.107993	0.026768	4.93767e-19	0.234489	0.0263067	0.250393	0.0423651	0.0368586	5.21809e-06	0.167622	0.0367929	0.00945432	0.0909625	0.0350507	1.14292e-21	3.21575e-22	0.00942622	1	0.149544
rs2521793	16:19511391	C:0.341455	rs2856614	16:19512116	T:0.339589	17957	6659	5	1	0.00943655	0.397948	-0.192023	0.227168	0.726637	0.0794898	0.227372	0.536252	-0.140815	0.227676	0.390679	0.19882	0.231621	0.00947243	-0.100167	0.0386074	0.000128326	1.81844e-05	0.00943655	1	0.149544
rs1134662	16:19510249	G:0.339589	rs2521793	16:19511391	C:0.341455	17957	6659	5	1	0.00943655	0.726637	0.0794898	0.227372	0.397948	-0.192023	0.227168	0.390679	0.19882	0.231621	0.536252	-0.140815	0.227676	0.00947243	-0.100167	0.0386074	0.000128326	1.81844e-05	0.00943655	1	0.149544
rs1967951	16:19503773	T:0.338557	rs2856609	16:19506773	G:0.33864	18090	6708	5	1	0.00947797	0.898817	-0.156541	1.23109	0.97009	0.0461686	1.2313	0.995405	-0.00709709	1.23243	0.956821	0.0666677	1.23131	0.00950889	-0.0998503	0.0385047	0.000201098	2.81164e-05	0.00947797	1	0.149544
rs1967951	16:19503773	T:0.338557	rs2856610	16:19507031	T:0.33864	18090	6708	5	1	0.00947797	0.898817	-0.156541	1.23109	0.97009	0.0461686	1.2313	0.995405	-0.00709709	1.23243	0.956821	0.0666677	1.23131	0.00950889	-0.0998503	0.0385047	0.000201098	2.81164e-05	0.00947797	1	0.149544
rs117537110	6:30649931	G:0.447448	rs11572103	10:96818106	T:0.479454	18106	6712	5	1	0.00949875	7.18982e-07	0.610086	0.123096	5.28294e-06	-0.157074	0.0344972	6.05847e-06	0.565227	0.12493	3.17245e-07	-0.233708	0.0457095	0.00971321	0.0885329	0.0342371	1.12925e-10	2.30326e-11	0.00949875	1	0.149544
rs4132670	10:114767771	A:0.397284	rs7918599	10:114777396	C:0.449939	17928	6647	5	1	0.00951957	7.96631e-13	0.266721	0.0372425	0.194843	0.0475292	0.0366629	5.5391e-08	0.222506	0.0409539	0.789038	0.0105337	0.0393696	0.00950085	0.105871	0.0408218	3.39039e-18	8.86086e-19	0.00951957	1	0.149544
rs4148475	13:95853574	T:0.245816	rs4148427	13:95925674	T:0.251726	18105	6712	5	1	0.00959283	0.002249	-0.120467	0.0394301	0.00833978	-0.103093	0.0390799	0.417132	-0.0404687	0.0498747	0.639371	-0.0232691	0.0496589	0.0095601	-0.0985849	0.0380439	4.13651e-07	7.11358e-08	0.00959283	1	0.149781
rs1967951	16:19503773	T:0.338872	rs2074172	16:19529042	A:0.339842	18026	6684	5	1	0.00959283	0.706777	0.134772	0.358256	0.493244	-0.245601	0.35846	0.464749	0.264767	0.362174	0.567055	-0.205612	0.359214	0.00963384	-0.0998202	0.0385599	0.000174888	2.48396e-05	0.00959283	1	0.149781
rs2353696	16:19505813	T:0.339704	rs2521793	16:19511391	C:0.341403	17948	6656	5	1	0.00961387	0.95978	0.0110479	0.219074	0.569477	-0.124489	0.218855	0.575014	0.125063	0.223054	0.755262	-0.0684281	0.219526	0.00965002	-0.0998926	0.0385965	0.000128954	1.85643e-05	0.00961387	1	0.149781
rs11572103	10:96818106	T:0.479237	rs12288760	11:56333753	C:0.169146	18085	6707	5	1	0.00971977	6.77451e-06	-0.155528	0.0345567	3.77797e-05	-0.138559	0.0336254	3.04733e-07	-0.189633	0.0370341	2.28795e-06	-0.225153	0.0476396	0.00971625	0.0903264	0.0349322	6.49301e-09	1.24668e-09	0.00971977	1	0.151016
rs17866193	4:118392862	C:0.442518	rs6585202	10:114782803	T:0.462478	17936	6657	5	1	0.00982686	4.76836e-06	0.116625	0.0254933	2.86118e-07	-0.130555	0.0254377	1.10273e-06	0.198863	0.0408145	0.217465	-0.0497177	0.0403128	0.00985506	-0.086303	0.0334394	4.74434e-11	1.01262e-11	0.00982686	1	0.151809
rs74987670	10:112820864	G:0.0596836	rs10787473	10:114781400	C:0.452961	17953	6662	5	1	0.00983764	1.45676e-05	-0.232474	0.0536257	2.76335e-07	-0.132027	0.0256917	2.60822e-06	-0.402921	0.0857373	1.48387e-08	-0.152125	0.026861	0.00977706	0.189235	0.0732444	1.02719e-10	2.16412e-11	0.00983764	1	0.151809
rs599136	10:112823415	A:0.0600524	rs10787473	10:114781400	C:0.453178	17951	6662	5	1	0.0098917	1.76943e-05	-0.229363	0.0534376	2.72852e-07	-0.132059	0.0256859	2.91855e-06	-0.397948	0.0850958	1.45292e-08	-0.152277	0.0268707	0.00984117	0.187787	0.0727472	1.2222e-10	2.5791e-11	0.0098917	1	0.151809
rs1522812	2:226997454	A:0.360889	rs7904519	10:114773927	A:0.450266	17885	6608	5	1	0.00990255	3.63134e-05	0.110186	0.0266808	8.64421e-08	-0.138316	0.0258383	4.62152e-06	0.197585	0.0431288	0.0705777	-0.0679149	0.0375597	0.00994478	-0.088899	0.0344871	1.17883e-10	2.49162e-11	0.00990255	1	0.151809
rs74987670	10:112820864	G:0.0597348	rs10885406	10:114777724	A:0.452775	17946	6651	5	1	0.00992428	1.62317e-05	-0.231176	0.0536213	3.21067e-07	-0.131347	0.0257008	2.82943e-06	-0.401265	0.0856887	1.74181e-08	-0.151456	0.0268736	0.00986546	0.188929	0.073214	1.33058e-10	2.81148e-11	0.00992428	1	0.151809
rs74987670	10:112820864	G:0.0597402	rs7899529	10:114779538	G:0.453139	17936	6649	5	1	0.00997883	1.73112e-05	-0.230387	0.0536155	4.84731e-07	-0.12942	0.0257181	2.97772e-06	-0.400399	0.0856953	2.69475e-08	-0.149514	0.0268901	0.00991643	0.18883	0.073226	2.14085e-10	4.50513e-11	0.00997883	1	0.151809
rs74987670	10:112820864	G:0.059657	rs10787472	10:114781297	A:0.45287	17961	6667	5	1	0.0100007	1.45588e-05	-0.232484	0.0536264	3.01358e-07	-0.131581	0.0256865	2.66503e-06	-0.402551	0.0857388	1.64169e-08	-0.151625	0.026855	0.00994567	0.188805	0.073245	1.115e-10	2.37957e-11	0.0100007	1	0.151809
rs599136	10:112823415	A:0.0601037	rs10885406	10:114777724	A:0.452993	17944	6651	5	1	0.0100007	1.97861e-05	-0.228016	0.0534333	3.17247e-07	-0.131376	0.0256949	3.18114e-06	-0.39622	0.0850483	1.70806e-08	-0.1516	0.0268832	0.00994285	0.187452	0.0727177	1.58939e-10	3.36981e-11	0.0100007	1	0.151809
rs11572103	10:96818106	T:0.479235	rs11228658	11:56335596	T:0.169164	18083	6706	5	1	0.0100117	7.10705e-06	-0.15518	0.0345577	3.87611e-05	-0.138362	0.033626	3.266e-07	-0.189159	0.0370362	2.41947e-06	-0.224614	0.0476402	0.0100112	0.0899674	0.0349328	6.97279e-09	1.37167e-09	0.0100117	1	0.151809
rs599136	10:112823415	A:0.0601093	rs7899529	10:114779538	G:0.453357	17934	6649	5	1	0.0100557	2.10333e-05	-0.227261	0.0534275	4.78573e-07	-0.129454	0.0257122	3.34036e-06	-0.395393	0.0850547	2.63937e-08	-0.149665	0.0268997	0.00999181	0.187359	0.0727295	2.54729e-10	5.37882e-11	0.0100557	1	0.151831
rs599136	10:112823415	A:0.0600256	rs10787472	10:114781297	A:0.453088	17959	6667	5	1	0.0100667	1.76799e-05	-0.229375	0.0534383	2.9765e-07	-0.131612	0.0256807	2.98129e-06	-0.397583	0.0850972	1.60804e-08	-0.151775	0.0268646	0.010011	0.187358	0.0727478	1.32669e-10	2.83856e-11	0.0100667	1	0.151831
rs17866193	4:118392862	C:0.441754	rs6585199	10:114765171	G:0.45726	17864	6624	5	1	0.0102113	4.19905e-06	0.117666	0.0255724	2.87799e-08	-0.143135	0.0257962	1.01078e-06	0.198768	0.0406517	0.127355	-0.0620911	0.0407258	0.0102533	-0.0857585	0.0334059	4.29389e-12	9.8751e-13	0.0102113	1	0.153603
rs7821832	8:25889446	G:0.302051	rs6997996	8:25891653	G:0.278068	17992	6638	5	1	0.0102787	0.547253	0.0454581	0.0755266	0.0368021	-0.159348	0.0763177	0.93855	0.00594884	0.0771651	0.00150371	-0.295272	0.0930294	0.0101927	0.111732	0.0434885	0.000124743	1.90414e-05	0.0102787	1	0.15398
rs599136	10:112823415	A:0.0600836	rs7918599	10:114777396	C:0.450446	17950	6658	5	1	0.0103353	2.13844e-05	-0.227053	0.0534253	1.46554e-07	-0.135515	0.0257788	3.30857e-06	-0.392432	0.0843819	7.86623e-09	-0.155557	0.0269535	0.0102606	0.186058	0.0724829	8.18148e-11	1.80718e-11	0.0103353	1	0.15398
rs599136	10:112823415	A:0.0598572	rs7904519	10:114773927	A:0.450993	17926	6646	5	1	0.0103466	1.96109e-05	-0.229073	0.0536561	1.31969e-07	-0.136075	0.0257908	3.22477e-06	-0.396845	0.0852338	7.04099e-09	-0.15615	0.0269692	0.0102699	0.187669	0.0731193	6.71677e-11	1.49039e-11	0.0103466	1	0.15398
rs1562692	3:34534267	G:0.121984	rs6585199	10:114765171	G:0.457132	17904	6648	5	1	0.010358	6.56193e-05	0.219982	0.0551106	6.45612e-09	-0.149589	0.0257712	0.120734	0.108868	0.0701606	2.33516e-10	-0.176263	0.0278127	0.0104201	0.115287	0.0450064	1.76075e-11	4.00411e-12	0.010358	1	0.15398
rs17866193	4:118392862	C:0.442467	rs10885405	10:114777670	C:0.462221	17920	6640	5	1	0.0103808	3.76882e-06	0.117934	0.0255061	3.55523e-07	-0.12963	0.0254609	1.01651e-06	0.199576	0.0408262	0.222572	-0.049242	0.0403716	0.010412	-0.0857389	0.0334678	4.67078e-11	1.04618e-11	0.0103808	1	0.15398
rs11572103	10:96818106	T:0.479221	rs7483053	11:56340724	T:0.169221	18071	6701	5	1	0.010415	9.5992e-06	-0.153023	0.0345736	3.69182e-05	-0.138783	0.0336366	4.59521e-07	-0.186841	0.0370533	2.43903e-06	-0.224606	0.047655	0.0104144	0.0895097	0.0349407	8.91834e-09	1.80607e-09	0.010415	1	0.15398
rs599136	10:112823415	A:0.0599777	rs10885405	10:114777670	C:0.462322	17915	6642	5	1	0.0104264	1.2902e-05	-0.233719	0.0535836	3.06905e-07	-0.130335	0.0254602	3.00333e-06	-0.408577	0.0874787	1.62404e-08	-0.150787	0.0266978	0.0103933	0.188652	0.0736214	9.29804e-11	2.06481e-11	0.0104264	1	0.15398
rs74987670	10:112820864	G:0.0595836	rs10885405	10:114777670	C:0.462073	17916	6641	5	1	0.0104608	1.00735e-05	-0.237502	0.0537871	2.9133e-07	-0.130624	0.0254678	2.64697e-06	-0.414073	0.0881669	1.56076e-08	-0.150908	0.0266869	0.0104323	0.189972	0.074174	6.97071e-11	1.56059e-11	0.0104608	1	0.154087
rs599136	10:112823415	A:0.0600713	rs12258200	10:114781698	T:0.450423	17962	6667	5	1	0.0105879	1.79034e-05	-0.229156	0.0534219	1.07102e-07	-0.137034	0.0257861	3.05863e-06	-0.394422	0.0845158	5.77061e-09	-0.15698	0.0269573	0.01052	0.185677	0.0725797	4.9478e-11	1.12637e-11	0.0105879	1	0.155153
rs2894593	2:227190317	T:0.383331	rs74987670	10:112820864	G:0.0596526	18021	6680	5	1	0.0105879	4.45193e-06	-0.118634	0.0258512	1.35244e-05	-0.233184	0.0535878	2.4912e-07	-0.14068	0.0272723	1.45443e-06	-0.376931	0.0782437	0.0103727	0.193117	0.0753437	1.55584e-09	3.31645e-10	0.0105879	1	0.155153
rs599136	10:112823415	A:0.0601202	rs11196191	10:114780633	A:0.450317	17964	6668	5	1	0.0106462	1.63011e-05	-0.230243	0.0534166	1.04535e-07	-0.137143	0.0257853	2.87027e-06	-0.395127	0.0844307	5.63854e-09	-0.157089	0.0269581	0.0105749	0.185442	0.0725393	4.46125e-11	1.02238e-11	0.0106462	1	0.155605
rs7821832	8:25889446	G:0.302352	rs10787473	10:114781400	C:0.453068	17941	6631	5	1	0.0106931	0.000411724	-0.0973845	0.0275685	2.7618e-07	-0.132136	0.0257123	2.25223e-05	-0.178283	0.0420647	2.17054e-08	-0.18493	0.0330359	0.0106803	0.0928579	0.0363722	2.27038e-09	4.84364e-10	0.0106931	1	0.155888
rs4919764	12:53272051	G:0.428325	rs7972359	12:106264199	G:0.338343	17998	6678	5	1	0.0107638	1.59495e-06	0.12241	0.0255076	2.49159e-05	0.109564	0.0259903	1.89782e-07	0.186214	0.0357479	3.12599e-06	0.188753	0.0404845	0.0107778	-0.0933679	0.0366174	1.8243e-09	3.93207e-10	0.0107638	1	0.156516
rs7708975	5:132650567	T:0.096171	rs849135	7:28196413	A:0.422556	17942	6661	5	1	0.010835	0.000205544	-0.159848	0.0430613	5.01989e-06	-0.116813	0.0255946	1.10007e-05	-0.273756	0.0622666	2.16984e-07	-0.143416	0.0276641	0.0107471	0.152583	0.0598173	2.84533e-08	5.80972e-09	0.010835	1	0.157148
rs7821832	8:25889446	G:0.302329	rs10787472	10:114781297	A:0.452978	17949	6636	5	1	0.0110514	0.000439359	-0.0968918	0.0275634	3.01091e-07	-0.131691	0.0257071	2.46233e-05	-0.177395	0.0420544	2.43327e-08	-0.184218	0.033026	0.011047	0.0924158	0.0363669	2.62085e-09	5.73694e-10	0.0110514	1	0.159879
rs4148749	7:87144413	C:0.489221	rs4646362	17:17468641	C:0.495871	18045	6692	5	1	0.0111859	0.00257122	0.143561	0.0476182	0.0339898	-0.0948643	0.0447432	9.01136e-05	0.259701	0.0663216	0.88755	0.00858971	0.0607454	0.0113598	-0.124828	0.0493112	1.39098e-07	2.81037e-08	0.0111859	1	0.161412
rs1967951	16:19503773	T:0.339281	rs2521793	16:19511391	C:0.341121	17935	6650	5	1	0.0113594	0.855714	0.039704	0.218355	0.49018	-0.15056	0.218196	0.488732	0.154217	0.222752	0.652178	-0.0986753	0.218919	0.0114034	-0.0977558	0.0386373	0.000185441	3.03654e-05	0.0113594	1	0.163087
rs4132670	10:114767771	A:0.396899	rs7904519	10:114773927	A:0.450545	17895	6634	5	1	0.0113594	9.03812e-13	0.267185	0.0373977	0.188508	0.0484359	0.0368333	4.79833e-08	0.224182	0.0410693	0.751696	0.0124992	0.0395037	0.0113427	0.103611	0.0409213	3.72362e-18	1.13566e-18	0.0113594	1	0.163087
rs599136	10:112823415	A:0.0598896	rs6585202	10:114782803	T:0.462583	17933	6661	5	1	0.0114347	1.38724e-05	-0.232805	0.0535692	2.64613e-07	-0.130921	0.025436	3.5516e-06	-0.405532	0.087474	1.4698e-08	-0.151105	0.0266733	0.0113946	0.186218	0.0735933	8.59928e-11	2.07274e-11	0.0114347	1	0.163752
rs4646698	3:125886441	C:0.479057	rs4646362	17:17468641	C:0.496878	18097	6714	5	1	0.0114725	0.00193876	0.207672	0.0670027	0.255746	-0.0599232	0.0527259	7.82025e-05	0.312532	0.0791252	0.551788	0.0392879	0.0660209	0.011657	-0.145995	0.0578803	5.16231e-08	1.09225e-08	0.0114725	1	0.16388
rs74987670	10:112820864	G:0.0594959	rs6585202	10:114782803	T:0.462334	17934	6660	5	1	0.0115104	1.09248e-05	-0.236493	0.0537727	2.51505e-07	-0.131201	0.0254435	3.16299e-06	-0.410835	0.0881632	1.41667e-08	-0.151212	0.0266623	0.0114745	0.187434	0.0741462	6.51648e-11	1.58776e-11	0.0115104	1	0.164009
rs2521793	16:19511391	C:0.341645	rs2074172	16:19529042	A:0.34078	17906	6641	5	1	0.0116634	0.693134	-0.0770034	0.195141	0.846322	-0.0378715	0.195402	0.973399	-0.00655183	0.196481	0.772719	0.0572917	0.198365	0.0117057	-0.0972089	0.0385613	0.000112476	1.92031e-05	0.0116634	1	0.165773
rs7483053	11:56340724	T:0.169005	rs4149477	22:26931305	C:0.482267	17961	6670	5	1	0.0117925	5.43319e-05	-0.136297	0.0337689	4.06842e-08	0.258593	0.047121	0.233358	-0.0553597	0.0464523	4.42112e-09	0.281927	0.0480479	0.011818	-0.0848048	0.0336857	5.1449e-11	1.28577e-11	0.0117925	1	0.167189
rs10746051	12:106256437	C:0.326111	rs7972359	12:106264199	G:0.337987	17977	6666	5	1	0.01191	0.0205229	0.214994	0.092804	0.283204	-0.0982806	0.0915815	0.00148812	0.326551	0.102786	0.621443	-0.0463216	0.0938052	0.0119845	-0.0980935	0.0390406	1.8981e-05	3.514e-06	0.01191	1	0.168199
rs12288760	11:56333753	C:0.168929	rs4149477	22:26931305	C:0.482281	17975	6676	5	1	0.0119231	5.53834e-05	-0.136097	0.0337571	4.07875e-08	0.258571	0.0471208	0.233686	-0.0553042	0.0464383	4.45705e-09	0.281854	0.0480465	0.0119467	-0.0846441	0.0336729	5.2515e-11	1.32456e-11	0.0119231	1	0.168199
rs17866193	4:118392862	C:0.442416	rs12258200	10:114781698	T:0.450348	17965	6663	5	1	0.0120022	6.06719e-06	0.115275	0.0254807	1.26608e-07	-0.136286	0.0257937	1.53589e-06	0.193536	0.0402655	0.16394	-0.0567873	0.0407972	0.0120423	-0.0838057	0.0333767	2.62776e-11	6.74861e-12	0.0120022	1	0.168894
rs17866193	4:118392862	C:0.442339	rs11196191	10:114780633	A:0.450242	17967	6664	5	1	0.0122291	6.08552e-06	0.115255	0.0254797	1.24565e-07	-0.136357	0.0257926	1.57835e-06	0.193297	0.0402615	0.161787	-0.0570753	0.0407946	0.0122712	-0.0835811	0.0333757	2.60476e-11	6.80061e-12	0.0122291	1	0.171662
rs7821832	8:25889446	G:0.302392	rs6585199	10:114765171	G:0.457229	17851	6597	5	1	0.0122967	0.00025799	-0.10105	0.0276531	2.5779e-08	-0.14377	0.0258211	1.89374e-05	-0.181205	0.0423667	3.61164e-09	-0.195756	0.033173	0.0122866	0.0913345	0.0364783	1.40675e-10	3.57954e-11	0.0122967	1	0.172139
rs11228658	11:56335596	T:0.168948	rs4149477	22:26931305	C:0.482279	17973	6675	5	1	0.0123239	5.68025e-05	-0.135899	0.0337577	4.12644e-08	0.258474	0.0471209	0.232192	-0.0554831	0.0464398	4.57201e-09	0.281652	0.0480467	0.0123509	-0.08425	0.0336737	5.45004e-11	1.41382e-11	0.0123239	1	0.172139
rs4132670	10:114767771	A:0.394902	rs10885409	10:114808072	T:0.456583	17850	6621	5	1	0.0124605	7.00253e-12	0.249475	0.0363794	0.448193	0.0270735	0.0356967	9.04114e-07	0.201746	0.0410767	0.728724	-0.0136144	0.0392547	0.0124601	0.0992252	0.0397085	1.39162e-17	4.53376e-18	0.0124605	1	0.17362
rs4132670	10:114767771	A:0.397473	rs12265291	10:114810240	T:0.449571	17966	6658	5	1	0.0127104	7.7308e-12	0.251806	0.0367952	0.491569	0.0249947	0.0363392	3.21647e-07	0.208191	0.0407394	0.761815	-0.0119023	0.0392688	0.0126972	0.10108	0.0405594	3.39371e-18	1.14336e-18	0.0127104	1	0.176668
rs12255372	10:114808902	T:0.286363	rs12718338	10:114813047	C:0.457339	17944	6654	5	1	0.0128089	4.84589e-10	0.210729	0.0338574	0.449255	-0.024358	0.0321915	4.34709e-05	0.160887	0.0393539	0.111596	-0.0548439	0.03447	0.0127905	0.114961	0.0461774	5.20166e-16	1.66115e-16	0.0128089	1	0.177561
rs6436602	2:227005350	G:0.366179	rs11196205	10:114807047	G:0.456423	17968	6666	5	1	0.0128372	5.04302e-05	0.107491	0.0265172	5.39499e-08	-0.139597	0.0256717	8.20644e-06	0.19162	0.0429668	0.0546615	-0.0718523	0.0373927	0.0128771	-0.0852349	0.0342701	9.68733e-11	2.57663e-11	0.0128372	1	0.177561
rs11158715	14:68489386	T:0.306515	rs1555944	14:68625118	G:0.32084	17836	6639	5	1	0.0129797	0.201177	0.0589213	0.0460969	0.14434	0.0708402	0.0485268	0.0114272	0.145877	0.0576736	0.0123413	0.139119	0.0555981	0.0129666	-0.0947899	0.0381496	0.000232595	4.2281e-05	0.0129797	1	0.179095
rs17866193	4:118392862	C:0.441906	rs6585201	10:114768783	G:0.467378	17902	6632	5	1	0.0131819	2.74116e-06	0.119676	0.0255209	3.36179e-08	-0.140889	0.0255166	1.20131e-06	0.199318	0.0410506	0.116112	-0.0633763	0.0403335	0.0132248	-0.0827691	0.0334062	3.3769e-12	9.74319e-13	0.0131819	1	0.181443
rs4132670	10:114767771	A:0.396636	rs6573817	14:68617269	G:0.319309	17898	6638	5	1	0.0132549	3.48403e-19	0.234955	0.0262454	6.08127e-05	0.122966	0.0306676	1.99799e-17	0.288122	0.033921	3.63558e-06	0.192883	0.0416485	0.0132448	-0.0835516	0.0337293	1.82638e-21	6.90437e-22	0.0132549	1	0.182006
rs117537110	6:30649931	G:0.447026	rs2074172	16:19529042	A:0.340079	18037	6686	5	1	0.0132989	9.3597e-07	0.604134	0.123176	2.51406e-05	-0.113327	0.0268961	2.20593e-07	0.643147	0.124134	0.134762	-0.0538435	0.0360016	0.0133316	-0.0663238	0.0267998	6.89726e-10	1.82189e-10	0.0132989	1	0.182169
rs6436602	2:227005350	G:0.364765	rs12265291	10:114810240	T:0.449273	18087	6704	5	1	0.0135062	3.97675e-05	0.108754	0.0264684	8.48852e-09	-0.148405	0.0257716	7.30253e-06	0.191535	0.0427087	0.0308225	-0.0809955	0.0375091	0.0135648	-0.084455	0.0342119	1.26698e-11	3.65166e-12	0.0135062	1	0.18412
rs6997996	8:25891653	G:0.278109	rs10885405	10:114777670	C:0.461935	17930	6626	5	1	0.0135062	5.91532e-05	-0.111948	0.0278744	2.11981e-07	-0.132152	0.0254701	8.62241e-06	-0.19588	0.0440267	2.19252e-08	-0.181893	0.0325036	0.0134937	0.0928508	0.0375843	2.56727e-10	7.0067e-11	0.0135062	1	0.18412
rs7821832	8:25889446	G:0.302555	rs7899529	10:114779538	G:0.453275	17924	6618	5	1	0.0135661	0.00034119	-0.0987766	0.0275771	5.29857e-07	-0.129082	0.0257383	2.58068e-05	-0.177008	0.0420683	5.03129e-08	-0.180097	0.0330441	0.0135534	0.0898173	0.0363797	3.62451e-09	9.41326e-10	0.0135661	1	0.184492
rs17866193	4:118392862	C:0.442774	rs7904519	10:114773927	A:0.450973	17929	6643	5	1	0.0136262	2.37234e-06	0.120418	0.0255188	1.70986e-07	-0.134889	0.0257993	9.94843e-07	0.197581	0.0403832	0.16553	-0.0566482	0.0408508	0.0136536	-0.0825133	0.033457	1.44271e-11	4.18083e-12	0.0136262	1	0.184867
rs4132670	10:114767771	A:0.394895	rs11196205	10:114807047	G:0.456708	17844	6619	5	1	0.0137473	4.69217e-12	0.25179	0.0364143	0.397357	0.0302326	0.0357211	6.31688e-07	0.204748	0.0411036	0.801114	-0.00989427	0.0392777	0.0137419	0.0978346	0.0397066	1.27827e-17	4.54252e-18	0.0137473	1	0.186064
rs12265291	10:114810240	T:0.449257	rs35748167	18:58037433	G:0.168979	18091	6707	5	1	0.0138082	1.25921e-08	-0.146785	0.0257902	5.97953e-09	-0.260618	0.0448003	3.15887e-05	-0.117874	0.0283235	0.00224684	-0.173855	0.056899	0.0139344	-0.0829044	0.0337154	1.84595e-15	6.19198e-16	0.0138082	1	0.186444
rs4132670	10:114767771	A:0.396719	rs8011527	14:68638685	A:0.320528	17922	6638	5	1	0.0138694	5.60476e-19	0.233496	0.0262367	8.07326e-05	0.120909	0.0306703	3.18683e-17	0.286403	0.033936	4.83739e-06	0.190199	0.0416034	0.0138546	-0.0827467	0.0336231	3.85889e-21	1.5068e-21	0.0138694	1	0.186589
rs7483053	11:56340724	T:0.169244	rs4148423	13:95931595	C:0.478741	18039	6685	5	1	0.0138848	5.33532e-05	-0.136029	0.0336669	3.67029e-07	0.234079	0.0460305	0.213257	-0.0575323	0.0462233	4.3914e-08	0.257423	0.0470236	0.0139188	-0.0829937	0.0337462	4.52333e-10	1.25065e-10	0.0138848	1	0.186589
rs17866193	4:118392862	C:0.444164	rs12718338	10:114813047	C:0.458116	17847	6611	5	1	0.0139309	3.46555e-06	0.118709	0.0255778	3.98003e-08	-0.141629	0.0257895	1.41347e-06	0.196903	0.0408249	0.12099	-0.0634359	0.0409097	0.0139625	-0.0826189	0.0336091	5.3282e-12	1.60081e-12	0.0139309	1	0.186767
rs12288760	11:56333753	C:0.169169	rs4148423	13:95931595	C:0.478757	18053	6691	5	1	0.0140392	5.44063e-05	-0.135827	0.0336552	3.67626e-07	0.234063	0.04603	0.213559	-0.0574773	0.0462096	4.42404e-08	0.25735	0.0470215	0.0140733	-0.0828289	0.0337336	4.61255e-10	1.28709e-10	0.0140392	1	0.187307
rs1562692	3:34534267	G:0.121547	rs1824332	4:128668850	C:0.478947	18026	6691	5	1	0.0140703	6.32753e-05	0.219882	0.054967	6.33111e-07	0.224095	0.0449914	0.429773	0.0662008	0.0838431	5.1505e-06	0.207331	0.0454817	0.0142435	0.136142	0.0555443	1.3865e-09	3.79171e-10	0.0140703	1	0.187307
rs6436602	2:227005350	G:0.364518	rs117537110	6:30649931	G:0.447326	18102	6709	5	1	0.0140703	3.61024e-05	0.1093	0.0264577	5.93867e-07	0.614472	0.123062	0.0533651	0.0628337	0.0325234	8.92482e-06	0.556337	0.125253	0.014071	0.0670089	0.0272899	7.08154e-10	1.96311e-10	0.0140703	1	0.187307
rs17866193	4:118392862	C:0.441833	rs6585200	10:114768609	A:0.454523	17888	6633	5	1	0.0141798	3.84508e-06	0.117983	0.0255398	2.18636e-08	-0.144846	0.0258813	1.4701e-06	0.195041	0.0405049	0.100526	-0.0671362	0.0408792	0.014215	-0.081797	0.0333623	2.95114e-12	9.09213e-13	0.0141798	1	0.188322
rs4132670	10:114767771	A:0.394273	rs11196208	10:114811316	T:0.457019	17810	6601	5	1	0.0142901	1.05379e-11	0.247285	0.036371	0.523175	0.0227988	0.035709	1.12089e-06	0.200222	0.0411207	0.660146	-0.0172797	0.0392979	0.0142898	0.0973891	0.0397524	1.24501e-17	4.57773e-18	0.0142901	1	0.188651
rs1562692	3:34534267	G:0.121426	rs4646698	3:125886441	C:0.480192	18048	6697	5	1	0.0143059	5.18779e-05	0.222429	0.0549615	1.32046e-08	0.265505	0.046716	0.380317	0.0725955	0.0827476	1.33416e-07	0.248808	0.0471755	0.014457	0.134084	0.0548245	3.14195e-11	9.3692e-12	0.0143059	1	0.188651
rs12718338	10:114813047	C:0.457397	rs4148475	13:95853574	T:0.247951	17933	6647	5	1	0.0143059	3.86543e-08	-0.141457	0.0257341	3.9778e-06	-0.163869	0.0355269	0.000994849	-0.100767	0.0306099	0.072621	-0.0856766	0.0477253	0.0143645	-0.0770382	0.0314696	2.94826e-12	9.15347e-13	0.0143059	1	0.188651
rs4919764	12:53272051	G:0.427699	rs10861525	12:106260341	C:0.318729	17849	6624	5	1	0.0143376	9.61843e-07	0.125493	0.0256146	4.67526e-06	0.121508	0.0265367	1.57188e-07	0.18448	0.0351797	1.32845e-06	0.197731	0.0408919	0.0143499	-0.091653	0.0374341	2.61791e-10	7.52136e-11	0.0143376	1	0.188651
rs11228658	11:56335596	T:0.169187	rs4148423	13:95931595	C:0.478755	18051	6690	5	1	0.0145133	5.57894e-05	-0.135631	0.0336558	3.7309e-07	0.233934	0.04603	0.212176	-0.0576532	0.0462111	4.55144e-08	0.257115	0.0470217	0.0145369	-0.082437	0.0337343	4.79629e-10	1.3763e-10	0.0145133	1	0.190502
rs7821832	8:25889446	G:0.302418	rs12258200	10:114781698	T:0.450284	17952	6636	5	1	0.0145455	0.000378359	-0.0979627	0.0275584	1.14655e-07	-0.136872	0.0258161	2.96927e-05	-0.174644	0.0418228	1.49597e-08	-0.187174	0.0330577	0.0145409	0.0888605	0.0363644	9.00451e-10	2.55654e-10	0.0145455	1	0.190502
rs4148749	7:87144413	C:0.489476	rs7483053	11:56340724	T:0.16886	18006	6676	5	1	0.0146912	1.38553e-07	0.20507	0.0389337	3.08887e-05	-0.140479	0.0337139	9.55776e-09	0.233372	0.0406686	0.231936	-0.0571641	0.0478205	0.0147134	-0.0851034	0.0348877	1.4303e-10	4.24528e-11	0.0146912	1	0.191968
rs11765009	7:155556014	A:0.237927	rs2272479	7:155559403	G:0.238148	18119	6719	5	1	0.0148549	0.746181	0.266938	0.8247	0.846481	-0.159686	0.82478	0.611029	0.420317	0.82641	0.862876	-0.142336	0.824113	0.0149876	-0.113325	0.0465843	0.000913665	0.000175534	0.0148549	1	0.193645
rs4132670	10:114767771	A:0.398021	rs6585200	10:114768609	A:0.45432	17940	6649	5	1	0.0148879	1.14897e-11	0.256835	0.0378451	0.361346	0.0341031	0.0373608	1.79181e-07	0.216027	0.0413867	0.993994	0.000300235	0.039887	0.0148595	0.0994245	0.0408182	5.84664e-18	2.24744e-18	0.0148879	1	0.193645
rs17866193	4:118392862	C:0.443755	rs11196205	10:114807047	G:0.457208	17877	6627	5	1	0.0150205	3.71489e-06	0.118212	0.0255497	1.04099e-07	-0.13697	0.0257491	1.62677e-06	0.195305	0.0407311	0.142846	-0.0598229	0.0408271	0.0150547	-0.0815566	0.0335477	1.44271e-11	4.54925e-12	0.0150205	1	0.194923
rs6436602	2:227005350	G:0.366203	rs10885409	10:114808072	T:0.456273	17975	6668	5	1	0.0151208	4.92107e-05	0.107634	0.0265152	3.9287e-08	-0.141065	0.025676	9.9981e-06	0.18973	0.0429524	0.0454161	-0.07486	0.0374154	0.0151714	-0.0832098	0.0342672	6.99799e-11	2.1579e-11	0.0151208	1	0.195083
rs11158715	14:68489386	T:0.305872	rs6573817	14:68617269	G:0.317537	17916	6655	5	1	0.0151208	0.209179	0.0586412	0.0466953	0.141051	0.0725729	0.0493059	0.0139049	0.142062	0.0577555	0.0127227	0.141076	0.0566241	0.0150987	-0.0928231	0.0381987	0.000189283	3.94846e-05	0.0151208	1	0.195083
rs7821832	8:25889446	G:0.302495	rs11196191	10:114780633	A:0.450178	17954	6637	5	1	0.0151711	0.000395061	-0.0976524	0.0275592	1.12488e-07	-0.136955	0.0258148	3.21926e-05	-0.173803	0.0418059	1.55514e-08	-0.186941	0.0330556	0.0151631	0.0882924	0.0363574	9.26317e-10	2.7258e-10	0.0151711	1	0.195083
rs4148749	7:87144413	C:0.489401	rs12288760	11:56333753	C:0.168785	18020	6682	5	1	0.0151711	1.56741e-07	0.204089	0.0389152	3.14193e-05	-0.140299	0.033702	1.10723e-08	0.23224	0.0406481	0.229924	-0.057394	0.0478063	0.0151816	-0.0846837	0.0348777	1.64305e-10	5.00109e-11	0.0151711	1	0.195083
rs2943645	2:227099180	C:0.355958	rs599136	10:112823415	A:0.0600477	18019	6680	5	1	0.0152048	1.81649e-08	-0.144597	0.0256896	1.9806e-05	-0.227777	0.0533802	1.01173e-09	-0.166116	0.0271985	3.11838e-06	-0.364469	0.0781641	0.0150148	0.190165	0.0781922	9.2063e-12	2.95652e-12	0.0152048	1	0.195083
rs6997996	8:25891653	G:0.277886	rs6585202	10:114782803	T:0.462196	17948	6645	5	1	0.0153574	6.24832e-05	-0.111516	0.0278564	1.82278e-07	-0.132742	0.0254463	1.05837e-05	-0.19391	0.0440214	2.28222e-08	-0.181545	0.0324819	0.0153365	0.0910353	0.0375507	2.32387e-10	7.10129e-11	0.0153574	1	0.195712
rs11765009	7:155556014	A:0.237914	rs11771062	7:155557706	C:0.237942	18120	6719	5	1	0.0153574	0.584211	0.838097	1.53149	0.633228	-0.730778	1.53143	0.53725	0.927755	1.50371	0.665228	-0.650598	1.50355	0.0154956	-0.112739	0.0465752	0.000821407	0.000163074	0.0153574	1	0.195712
rs4148749	7:87144413	C:0.489399	rs11228658	11:56335596	T:0.168803	18018	6681	5	1	0.0153574	1.41066e-07	0.204886	0.0389232	3.22794e-05	-0.140094	0.0337028	1.00005e-08	0.232984	0.0406553	0.230428	-0.0573332	0.0478073	0.0153595	-0.0845342	0.0348769	1.51957e-10	4.68115e-11	0.0153574	1	0.195712
rs6997996	8:25891653	G:0.27801	rs6585201	10:114768783	G:0.467063	17913	6619	5	1	0.0156151	4.32708e-05	-0.114098	0.0279017	1.7896e-08	-0.14374	0.0255256	8.60015e-06	-0.196913	0.0442533	3.39023e-09	-0.192482	0.0325607	0.0155952	0.0908508	0.0375687	1.67357e-11	5.44343e-12	0.0156151	1	0.198106
rs17866193	4:118392862	C:0.442325	rs7918599	10:114777396	C:0.450401	17954	6655	5	1	0.0156151	4.18762e-06	0.117293	0.0254882	1.98367e-07	-0.134107	0.0257856	1.7187e-06	0.19257	0.0402531	0.158102	-0.0575815	0.0407949	0.0156531	-0.0806408	0.0333653	2.83021e-11	9.1209e-12	0.0156151	1	0.198106
rs6436602	2:227005350	G:0.366628	rs11196208	10:114811316	T:0.456723	17931	6647	5	1	0.0156672	6.19569e-05	0.106316	0.0265442	2.28845e-08	-0.143769	0.0257251	1.22914e-05	0.188155	0.0430329	0.0378204	-0.0778312	0.0374766	0.0157341	-0.0829189	0.0343346	5.11984e-11	1.63724e-11	0.0156672	1	0.198323
rs11771062	7:155557706	C:0.237927	rs2272479	7:155559403	G:0.238148	18119	6719	5	1	0.0158421	0.894897	0.0968177	0.732851	0.988726	0.0103573	0.732958	0.752489	0.231082	0.73276	0.950746	0.0451474	0.730897	0.0159678	-0.11221	0.0465669	0.000954711	0.000193213	0.0158421	1	0.199868
rs7918599	10:114777396	C:0.449532	rs12255372	10:114808902	T:0.284444	18051	6697	5	1	0.0158597	0.303074	-0.0318548	0.0309311	6.4275e-10	0.200334	0.0324187	0.055576	-0.0647439	0.0338204	0.000120713	0.149073	0.0387739	0.0158441	0.106501	0.0441457	2.98751e-15	1.12319e-15	0.0158597	1	0.199868
rs4132670	10:114767771	A:0.394314	rs12718338	10:114813047	C:0.457625	17817	6604	5	1	0.015948	1.29887e-11	0.245957	0.036337	0.549854	0.0213286	0.0356678	1.23196e-06	0.199474	0.041125	0.642076	-0.0182602	0.0392862	0.0159346	0.0956473	0.0396809	1.37139e-17	5.54172e-18	0.015948	1	0.200535
rs7821832	8:25889446	G:0.302508	rs7918599	10:114777396	C:0.450334	17940	6627	5	1	0.0160191	0.000362718	-0.0983163	0.0275718	1.72572e-07	-0.13489	0.0258079	3.20857e-05	-0.173787	0.0417946	2.36864e-08	-0.184397	0.0330303	0.0160067	0.0875183	0.0363333	1.30249e-09	3.98889e-10	0.0160191	1	0.200762
rs4646698	3:125886441	C:0.479343	rs7483053	11:56340724	T:0.16927	18057	6697	5	1	0.0160369	2.23557e-08	0.260777	0.046628	3.84617e-05	-0.138563	0.0336601	2.57476e-09	0.283591	0.0476093	0.179758	-0.0619294	0.0461642	0.0160692	-0.0810322	0.0336605	1.87614e-11	6.23203e-12	0.0160369	1	0.200762
rs17866193	4:118392862	C:0.44403	rs11196208	10:114811316	T:0.457511	17840	6608	5	1	0.0161262	3.43048e-06	0.118792	0.025584	4.43748e-08	-0.141204	0.0258025	1.71654e-06	0.19523	0.0408071	0.113969	-0.0646843	0.0409238	0.016167	-0.0808466	0.0336143	5.90354e-12	2.00989e-12	0.0161262	1	0.201216
rs7821832	8:25889446	G:0.301881	rs7904519	10:114773927	A:0.450854	17916	6615	5	1	0.0161441	0.000389467	-0.0979469	0.0276131	1.51342e-07	-0.13558	0.0258202	3.42859e-05	-0.173536	0.041887	2.15916e-08	-0.185133	0.033067	0.0161309	0.0876061	0.0364124	1.22957e-09	3.79534e-10	0.0161441	1	0.201216
rs4646698	3:125886441	C:0.479359	rs12288760	11:56333753	C:0.169194	18071	6703	5	1	0.016216	2.23628e-08	0.260772	0.0466276	3.92233e-05	-0.138362	0.0336484	2.59056e-09	0.283533	0.0476075	0.180024	-0.0618732	0.0461506	0.0162426	-0.0808698	0.0336478	1.91128e-11	6.40787e-12	0.016216	1	0.201669
rs11196191	10:114780633	A:0.449377	rs12255372	10:114808902	T:0.284473	18065	6707	5	1	0.0165254	0.273803	-0.0338617	0.0309424	6.54513e-10	0.200162	0.032406	0.0491289	-0.0665681	0.0338343	0.000117851	0.149239	0.0387578	0.0165001	0.105826	0.044137	1.99985e-15	7.83332e-16	0.0165254	1	0.205066
rs17866193	4:118392862	C:0.443777	rs10885409	10:114808072	T:0.457057	17884	6629	5	1	0.0165622	3.12356e-06	0.119108	0.0255457	7.63793e-08	-0.138439	0.0257537	1.66872e-06	0.195037	0.0407184	0.126296	-0.0624246	0.0408305	0.0166055	-0.0803403	0.0335404	9.09016e-12	3.14385e-12	0.0165622	1	0.205074
rs4132670	10:114767771	A:0.39707	rs1555944	14:68625118	G:0.322595	17818	6622	5	1	0.0167102	6.16824e-19	0.23353	0.0262719	8.04045e-05	0.12068	0.0306046	5.48387e-17	0.285391	0.0340732	6.05494e-06	0.188173	0.0415902	0.0167082	-0.0806945	0.0337201	4.24231e-21	1.9469e-21	0.0167102	1	0.206456
rs4646698	3:125886441	C:0.479357	rs11228658	11:56335596	T:0.169212	18069	6702	5	1	0.0167474	2.26836e-08	0.260656	0.0466275	4.02413e-05	-0.138166	0.033649	2.66595e-09	0.283311	0.0476076	0.178802	-0.0620492	0.046152	0.0167708	-0.0804771	0.0336486	1.98741e-11	6.84644e-12	0.0167474	1	0.206466
rs3739480	9:19516280	G:0.502785	rs4646362	17:17468641	C:0.494206	17951	6666	5	1	0.0167847	0.0395836	-0.103238	0.0501624	0.0125737	-0.116738	0.046777	0.00165271	-0.234484	0.0745235	0.000676285	-0.266755	0.0784802	0.0169189	0.133144	0.0557444	1.0248e-06	2.78288e-07	0.0167847	1	0.206477
rs7483053	11:56340724	T:0.169121	rs8192880	13:47369376	G:0.472538	18061	6698	5	1	0.0169159	3.39595e-05	-0.139506	0.0336554	2.65942e-07	0.215482	0.0418728	0.177899	-0.0625614	0.0464363	2.88932e-08	0.238502	0.0429887	0.0169577	-0.0825585	0.0345777	2.27448e-10	7.55747e-11	0.0169159	1	0.207641
rs6677242	1:217398785	A:0.2762	rs4919764	12:53272051	G:0.428168	17882	6638	5	1	0.0170292	3.81612e-05	-0.114687	0.0278478	1.86403e-06	0.121907	0.0255696	0.361815	-0.0385389	0.0422616	2.06565e-07	0.172218	0.0331614	0.0170463	-0.092926	0.0389511	2.00164e-09	6.40374e-10	0.0170292	1	0.20858
rs12255372	10:114808902	T:0.286224	rs11196208	10:114811316	T:0.456737	17937	6651	5	1	0.0170672	5.34555e-10	0.210389	0.0338866	0.456911	-0.023974	0.0322256	3.48539e-05	0.162824	0.0393372	0.124143	-0.0530093	0.0344751	0.0170612	0.110383	0.0462746	6.41693e-16	2.62341e-16	0.0170672	1	0.208595
rs12288760	11:56333753	C:0.169046	rs8192880	13:47369376	G:0.472559	18075	6704	5	1	0.0171052	3.46537e-05	-0.139302	0.0336437	2.6687e-07	0.215452	0.0418723	0.178089	-0.0625151	0.0464223	2.91891e-08	0.238414	0.0429866	0.0171564	-0.0823779	0.0345641	2.32387e-10	7.79269e-11	0.0171052	1	0.20861
rs12258200	10:114781698	T:0.449482	rs12255372	10:114808902	T:0.284532	18063	6706	5	1	0.0171624	0.271208	-0.0340497	0.0309463	7.24006e-10	0.199656	0.0324078	0.0491617	-0.0665661	0.0338382	0.000120772	0.149022	0.0387618	0.0171477	0.105192	0.0441329	2.23318e-15	9.02532e-16	0.0171624	1	0.208859
rs1522812	2:226997454	A:0.359881	rs2713538	2:227134516	G:0.452588	17949	6630	5	1	0.0172007	0.00046066	0.0941256	0.0268727	3.35011e-05	0.103874	0.0250403	5.25666e-05	0.175029	0.0432821	4.346e-06	0.165549	0.036035	0.0172447	-0.0821035	0.0344763	4.82121e-08	1.44825e-08	0.0172007	1	0.208876
rs11196208	10:114811316	T:0.456795	rs4148475	13:95853574	T:0.247573	17926	6644	5	1	0.0172775	4.3088e-08	-0.141034	0.0257468	5.03106e-06	-0.162041	0.0355081	0.000911194	-0.101528	0.0306122	0.0714412	-0.0860227	0.0477198	0.0173528	-0.0749253	0.0314925	4.15366e-12	1.50974e-12	0.0172775	1	0.20936
rs35748167	18:58037433	G:0.168416	rs4149477	22:26931305	C:0.481839	18006	6686	5	1	0.0175881	0.0254718	-0.19399	0.0868288	0.356386	0.0843211	0.0914274	0.887892	0.0174259	0.123613	0.0205171	0.291398	0.125778	0.0178012	-0.206335	0.0870714	1.54246e-08	4.85115e-09	0.0175881	1	0.212286
rs11196208	10:114811316	T:0.456705	rs35748167	18:58037433	G:0.170672	17935	6650	5	1	0.0176273	3.31304e-08	-0.14221	0.0257439	5.73119e-09	-0.261414	0.0448825	5.44743e-05	-0.11422	0.0283033	0.00184527	-0.177563	0.0570197	0.0177529	-0.0799654	0.0337302	4.67712e-15	1.91533e-15	0.0176273	1	0.212286
rs11228658	11:56335596	T:0.169064	rs8192880	13:47369376	G:0.472556	18073	6703	5	1	0.0176667	3.55542e-05	-0.139106	0.0336443	2.70593e-07	0.215343	0.0418723	0.176781	-0.062706	0.0464237	3.00637e-08	0.238192	0.0429868	0.0177242	-0.0819647	0.0345649	2.41644e-10	8.32507e-11	0.0176667	1	0.212286
chr10:114772253:i	10:114772253	C:0.449045	rs12255372	10:114808902	T:0.285108	18016	6680	5	1	0.0177061	0.322352	-0.0306945	0.031016	7.18669e-10	0.200076	0.0324698	0.0626702	-0.0631328	0.0339146	0.000115485	0.149663	0.0388178	0.0176733	0.104895	0.0442148	4.32141e-15	1.7784e-15	0.0177061	1	0.212286
rs11158715	14:68489386	T:0.305981	rs8011527	14:68638685	A:0.31883	17939	6656	5	1	0.0177061	0.230838	0.0553617	0.0462039	0.137989	0.0724578	0.0488483	0.0168966	0.137412	0.0575198	0.0135324	0.13837	0.0560329	0.0176885	-0.0904344	0.0381246	0.000301884	7.05645e-05	0.0177061	1	0.212286
rs2943645	2:227099180	C:0.355882	rs74987670	10:112820864	G:0.0596559	18020	6679	5	1	0.0177456	2.15955e-08	-0.143807	0.0256858	1.60927e-05	-0.231101	0.0535803	1.35736e-09	-0.164726	0.0271805	3.28418e-06	-0.365434	0.0785508	0.0175315	0.186468	0.0785007	8.72487e-12	3.20479e-12	0.0177456	1	0.21231
rs7821832	8:25889446	G:0.302441	chr10:114772253:i	10:114772253	C:0.449849	17906	6611	5	1	0.0177852	0.000325609	-0.0992289	0.0276094	2.30621e-07	-0.133765	0.0258593	3.35508e-05	-0.173602	0.0418528	3.46431e-08	-0.18262	0.0331061	0.0177698	0.0863855	0.0364437	1.54675e-09	5.16414e-10	0.0177852	1	0.212336
rs117537110	6:30649931	G:0.447498	rs1729752	13:95732362	G:0.29778	18104	6710	5	1	0.0178447	7.31058e-07	0.608858	0.122929	5.23568e-08	-0.168909	0.0310317	2.94989e-06	0.578612	0.123786	1.46262e-08	-0.23085	0.0407437	0.0178965	0.0735924	0.0310811	1.19704e-12	4.56559e-13	0.0178447	1	0.2126
rs7483053	11:56340724	T:0.169096	rs4646591	15:58303002	G:0.475341	18046	6694	5	1	0.0180448	5.58227e-05	-0.135787	0.0336956	2.04808e-06	0.183896	0.0387262	0.209442	-0.0586613	0.0467383	2.25282e-07	0.206719	0.039929	0.0180678	-0.0831032	0.0351503	1.98801e-09	6.68526e-10	0.0180448	1	0.214532
rs12288760	11:56333753	C:0.16902	rs4646591	15:58303002	G:0.47536	18060	6700	5	1	0.0182471	5.69113e-05	-0.135587	0.0336839	2.04562e-06	0.183904	0.0387259	0.209589	-0.0586244	0.046724	2.26493e-07	0.206669	0.0399271	0.0182812	-0.0829159	0.0351358	2.02326e-09	6.86664e-10	0.0182471	1	0.216484
rs8192880	13:47369376	G:0.472267	rs4646362	17:17468641	C:0.496823	18101	6715	5	1	0.0187843	0.00412963	0.150277	0.0523962	0.035488	-0.0960927	0.0456987	0.000241015	0.231529	0.0630591	0.73577	-0.0190491	0.0564485	0.0190961	-0.111108	0.0474081	1.47925e-07	4.65865e-08	0.0187843	1	0.222392
rs11228658	11:56335596	T:0.169039	rs4646591	15:58303002	G:0.475357	18058	6699	5	1	0.0188684	5.83515e-05	-0.135391	0.0336845	2.06838e-06	0.183818	0.0387259	0.207989	-0.0588327	0.0467255	2.3278e-07	0.206466	0.0399274	0.0189017	-0.0824822	0.0351367	2.09771e-09	7.32085e-10	0.0188684	1	0.222707
rs12255372	10:114808902	T:0.284921	rs10860059	12:97046476	G:0.258779	17998	6667	5	1	0.0188895	1.40541e-15	0.21587	0.0270344	2.68755e-05	-0.121165	0.0288595	1.77891e-06	0.165219	0.0345861	2.61397e-06	-0.179724	0.038247	0.0188394	0.101174	0.0430765	1.67182e-18	8.01423e-19	0.0188895	1	0.222707
rs117537110	6:30649931	G:0.447004	rs2856608	16:19505751	G:0.335233	18077	6699	5	1	0.0189952	6.71594e-07	0.611532	0.12306	2.12691e-05	-0.114063	0.0268312	1.72104e-07	0.648211	0.124008	0.11009	-0.0575252	0.036003	0.019011	-0.0627727	0.0267652	4.16709e-10	1.51167e-10	0.0189952	1	0.22349
rs117537110	6:30649931	G:0.448256	rs2521793	16:19511391	C:0.34134	17944	6652	5	1	0.019059	1.09227e-06	0.600814	0.123263	2.44025e-05	-0.113588	0.026915	2.81585e-07	0.637987	0.124234	0.112577	-0.0571854	0.0360401	0.0190943	-0.0628846	0.0268315	7.87692e-10	2.82944e-10	0.019059	1	0.223776
rs7904519	10:114773927	A:0.450067	rs35748167	18:58037433	G:0.168636	18024	6684	5	1	0.0193595	1.09039e-07	-0.136736	0.025746	7.78131e-09	-0.258329	0.0447468	0.000112606	-0.109247	0.0282899	0.00193124	-0.176132	0.0568056	0.0194932	-0.0785045	0.0336069	2.11878e-14	9.21228e-15	0.0193595	1	0.226531
rs2972143	2:227116365	A:0.342031	rs74987670	10:112820864	G:0.0596458	17956	6640	5	1	0.0194245	1.28608e-09	-0.157683	0.0259812	1.63523e-05	-0.231416	0.0536974	8.38737e-11	-0.178449	0.0274812	3.17934e-06	-0.358481	0.0769457	0.0190726	0.18613	0.0794034	6.02496e-13	2.49914e-13	0.0194245	1	0.226531
rs10885409	10:114808072	T:0.456255	rs35748167	18:58037433	G:0.170477	17979	6671	5	1	0.0194245	5.53385e-08	-0.139607	0.0256949	6.13073e-09	-0.260432	0.0448005	7.26134e-05	-0.112089	0.0282514	0.00173509	-0.178157	0.0568795	0.0195729	-0.0786201	0.0336784	8.54393e-15	3.77333e-15	0.0194245	1	0.226531
rs2972143	2:227116365	A:0.34205	rs599136	10:112823415	A:0.060039	17955	6641	5	1	0.0195115	9.45404e-10	-0.158955	0.02598	1.96543e-05	-0.228373	0.0534984	6.16326e-11	-0.17979	0.0274919	3.59228e-06	-0.354149	0.0764294	0.0191576	0.185266	0.0790905	5.55045e-13	2.31416e-13	0.0195115	1	0.226531
rs12718338	10:114813047	C:0.457307	rs35748167	18:58037433	G:0.170494	17942	6653	5	1	0.0195334	2.97441e-08	-0.142622	0.0257304	5.86466e-09	-0.261155	0.0448676	4.75352e-05	-0.115077	0.0282922	0.00172795	-0.178643	0.0570124	0.019668	-0.0786633	0.0337231	4.27941e-15	1.91717e-15	0.0195334	1	0.226531
rs1824332	4:128668850	C:0.477815	rs4646362	17:17468641	C:0.49657	18075	6708	5	1	0.0195334	0.0179807	0.145125	0.0613372	0.0615967	-0.0934427	0.0499911	0.00122056	0.235701	0.0728814	0.902282	-0.00764908	0.0622998	0.0198282	-0.123973	0.0532168	6.32594e-07	1.98119e-07	0.0195334	1	0.226531
rs11196191	10:114780633	A:0.449344	rs35748167	18:58037433	G:0.169075	18063	6706	5	1	0.0201097	8.57623e-08	-0.137836	0.0257418	4.78706e-09	-0.262692	0.0448709	9.34222e-05	-0.110515	0.0282858	0.00151835	-0.180705	0.0569839	0.0202563	-0.0779891	0.0335933	9.69101e-15	4.40192e-15	0.0201097	1	0.232739
rs10885406	10:114777724	A:0.452092	rs12255372	10:114808902	T:0.284483	18045	6690	5	1	0.0201774	0.399552	-0.0260105	0.0308759	2.8594e-10	0.204789	0.0324742	0.0864246	-0.0579871	0.0338203	6.85222e-05	0.154971	0.0389242	0.02015	0.102455	0.0440941	2.53547e-15	1.17635e-15	0.0201774	1	0.233046
rs12258200	10:114781698	T:0.449449	rs35748167	18:58037433	G:0.169094	18061	6705	5	1	0.0202906	8.66588e-08	-0.137793	0.0257429	5.37707e-09	-0.261779	0.0448632	9.36437e-05	-0.110505	0.0282876	0.00159141	-0.179906	0.0569779	0.0204313	-0.0778786	0.0335925	1.10243e-14	5.03722e-15	0.0202906	1	0.233878
rs4646362	17:17468641	C:0.497101	rs35748167	18:58037433	G:0.169345	18111	6718	5	1	0.0204731	0.237171	-0.0580095	0.0490738	0.000338715	-0.214435	0.0598355	0.0254799	-0.12889	0.0576933	5.09374e-05	-0.381941	0.0942766	0.0206385	0.126224	0.0545353	1.31804e-08	4.7368e-09	0.0204731	1	0.23529
rs1000796	1:217402330	A:0.274615	rs4919764	12:53272051	G:0.428217	17936	6657	5	1	0.0204961	5.26935e-05	-0.112644	0.0278591	2.73954e-06	0.119743	0.0255347	0.358267	-0.0388034	0.0422386	3.54862e-07	0.168322	0.0330581	0.0205243	-0.0902541	0.0389593	3.89994e-09	1.44154e-09	0.0204961	1	0.23529
rs12265291	10:114810240	T:0.449342	rs4148475	13:95853574	T:0.245355	18082	6701	5	1	0.0206574	1.5808e-08	-0.145795	0.0257927	5.07048e-06	-0.161716	0.0354497	0.000455914	-0.107418	0.0306435	0.0635706	-0.0882287	0.047558	0.0207259	-0.0727565	0.0314563	1.57963e-12	6.80251e-13	0.0206574	1	0.235876
rs10195178	2:227199263	T:0.428018	rs57225583	10:114771843	G:0.141473	18060	6697	5	1	0.0206805	9.16232e-07	0.123037	0.0250644	1.40365e-05	-0.153762	0.0354023	0.00135092	0.0914651	0.0285388	7.23963e-06	-0.25781	0.0574633	0.0206605	0.117258	0.0506702	4.96791e-10	1.93143e-10	0.0206805	1	0.235876
rs1532716	1:217402689	A:0.274605	rs4919764	12:53272051	G:0.428177	17933	6657	5	1	0.0207269	5.29565e-05	-0.1126	0.0278562	2.70816e-06	0.119801	0.0255342	0.357045	-0.0389005	0.0422367	3.5663e-07	0.168283	0.0330566	0.0207659	-0.0900816	0.038959	3.87337e-09	1.44568e-09	0.0207269	1	0.235876
rs7821832	8:25889446	G:0.30264	rs6585200	10:114768609	A:0.454436	17876	6607	5	1	0.0207501	0.000275173	-0.100461	0.0276174	1.80956e-08	-0.145831	0.0259058	3.64201e-05	-0.173599	0.042043	5.28402e-09	-0.193526	0.0331496	0.0207371	0.0841731	0.0363954	1.0807e-10	4.33989e-11	0.0207501	1	0.235876
rs1502364	1:217392174	G:0.274544	rs4919764	12:53272051	G:0.428305	17937	6655	5	1	0.0207734	3.21114e-05	-0.115854	0.0278632	2.12148e-06	0.121097	0.0255399	0.318204	-0.0421659	0.0422438	2.9082e-07	0.169528	0.0330508	0.0208026	-0.0900692	0.0389649	1.88773e-09	7.16849e-10	0.0207734	1	0.235876
rs2943645	2:227099180	C:0.355805	rs849135	7:28196413	A:0.422552	17941	6660	5	1	0.0207967	9.2587e-09	-0.14791	0.0257513	4.99159e-06	-0.116912	0.0256096	0.052725	-0.0773079	0.0399077	0.0963042	-0.0593615	0.0356945	0.0209215	-0.0836529	0.0362228	1.8217e-12	7.87204e-13	0.0207967	1	0.235876
rs12255372	10:114808902	T:0.284917	rs12265291	10:114810240	T:0.44929	18093	6708	5	1	0.0208901	4.91794e-09	0.196054	0.033514	0.244687	-0.0373101	0.0320712	9.39182e-05	0.151284	0.0387332	0.0592041	-0.0645106	0.0341928	0.0208609	0.106944	0.0462861	2.15814e-15	1.03387e-15	0.0208901	1	0.236463
rs117537110	6:30649931	G:0.447805	rs1134662	16:19510249	G:0.338881	18086	6704	5	1	0.021031	9.32606e-07	0.604291	0.12319	3.76805e-05	-0.110616	0.0268402	2.47535e-07	0.640513	0.124141	0.126219	-0.0550477	0.0359981	0.0210486	-0.0617059	0.0267459	1.0124e-09	3.93583e-10	0.021031	1	0.237111
rs117537110	6:30649931	G:0.447805	rs2856614	16:19512116	T:0.338881	18086	6704	5	1	0.021031	9.32606e-07	0.604291	0.12319	3.76805e-05	-0.110616	0.0268402	2.47535e-07	0.640513	0.124141	0.126219	-0.0550477	0.0359981	0.0210486	-0.0617059	0.0267459	1.0124e-09	3.93583e-10	0.021031	1	0.237111
rs74987670	10:112820864	G:0.059555	rs6573817	14:68617269	G:0.317906	17933	6650	5	1	0.0211255	1.38405e-05	-0.233837	0.0538004	0.000211188	0.113431	0.0306138	0.092552	-0.121346	0.0721401	3.13966e-05	0.13168	0.0316304	0.021542	-0.169805	0.0738815	7.02167e-08	2.49026e-08	0.0211255	1	0.237704
rs10885405	10:114777670	C:0.461423	rs12255372	10:114808902	T:0.284469	18016	6681	5	1	0.0212205	0.438061	-0.0238281	0.0307273	2.17147e-10	0.207162	0.0326306	0.0962019	-0.0562392	0.0338067	7.08004e-05	0.15644	0.0393701	0.0211973	0.101279	0.0439491	1.81733e-15	8.84453e-16	0.0212205	1	0.2383
rs10787473	10:114781400	C:0.452277	rs12255372	10:114808902	T:0.284539	18052	6701	5	1	0.0215321	0.387965	-0.0266545	0.0308747	2.87766e-10	0.204718	0.032468	0.0848299	-0.0582754	0.0338157	6.47383e-05	0.15545	0.0389127	0.0215003	0.101342	0.0440793	2.18571e-15	1.07449e-15	0.0215321	1	0.240845
rs1522812	2:226997454	A:0.360279	rs12265291	10:114810240	T:0.449499	17950	6630	5	1	0.0215321	4.07907e-05	0.10938	0.0266587	1.28073e-08	-0.147189	0.0258744	1.39258e-05	0.18715	0.0430721	0.0236993	-0.084778	0.0374797	0.02159	-0.0792054	0.0344745	2.01281e-11	8.60251e-12	0.0215321	1	0.240845
rs7904519	10:114773927	A:0.4501	rs12255372	10:114808902	T:0.285282	18026	6685	5	1	0.0215805	0.295456	-0.0324471	0.0310134	8.37591e-10	0.199517	0.0325071	0.0597195	-0.0638396	0.0339057	0.000104834	0.150689	0.0388462	0.0215497	0.101583	0.0442007	3.40186e-15	1.66563e-15	0.0215805	1	0.240911
rs1562692	3:34534267	G:0.121769	rs4149477	22:26931305	C:0.483066	17952	6669	5	1	0.0217506	3.57923e-05	0.227952	0.0551529	2.17221e-08	0.264404	0.0472344	0.318552	0.083861	0.0840763	1.59443e-07	0.249697	0.0476403	0.0219807	0.127626	0.0557148	3.54295e-11	1.51198e-11	0.0217506	1	0.241858
rs1562692	3:34534267	G:0.121743	rs4148749	7:87144413	C:0.490109	17997	6676	5	1	0.0217506	5.45893e-05	0.221787	0.0549649	1.98421e-07	0.202674	0.0389697	0.187787	0.100714	0.076463	1.21351e-05	0.17711	0.0404809	0.0218122	0.107516	0.046876	4.74968e-10	1.92958e-10	0.0217506	1	0.241858
rs6585202	10:114782803	T:0.461683	rs12255372	10:114808902	T:0.284546	18034	6700	5	1	0.0217995	0.418158	-0.0248522	0.0306961	2.42697e-10	0.20648	0.0326112	0.0908411	-0.0571201	0.0337794	7.41259e-05	0.155967	0.0393593	0.0217928	0.100742	0.0439163	1.7443e-15	8.69245e-16	0.0217995	1	0.241927
rs1875574	1:217403246	G:0.274648	rs4919764	12:53272051	G:0.427981	17912	6648	5	1	0.0219468	4.41601e-05	-0.113854	0.0278743	3.75523e-06	0.118117	0.0255416	0.334828	-0.040768	0.0422714	5.02838e-07	0.16617	0.0330671	0.0219725	-0.0893243	0.0389919	4.51518e-09	1.76345e-09	0.0219468	1	0.242612
rs905293	1:217405444	T:0.274633	rs4919764	12:53272051	G:0.427957	17913	6646	5	1	0.0219468	3.81682e-05	-0.11481	0.0278781	3.35118e-06	0.11873	0.0255441	0.323895	-0.0417072	0.0422786	4.56925e-07	0.166777	0.0330673	0.021969	-0.0893403	0.0389978	3.5233e-09	1.38352e-09	0.0219468	1	0.242612
rs1562692	3:34534267	G:0.121903	rs2308953	5:34909062	C:0.0845703	17920	6650	5	1	0.0220455	0.00398908	0.162422	0.0564156	1.33443e-07	0.67912	0.128766	0.0481664	0.118237	0.0598396	0.0019098	0.48526	0.156338	0.0231139	0.216607	0.0953564	2.90059e-10	1.20365e-10	0.0220455	1	0.24323
rs6436602	2:227005350	G:0.364378	rs2713538	2:227134516	G:0.453171	18087	6705	5	1	0.0221945	0.000506584	0.0928533	0.0267031	2.04576e-05	0.106311	0.0249565	7.71443e-05	0.17008	0.0430245	4.29028e-06	0.165864	0.0360824	0.0222206	-0.0782508	0.0342218	2.73099e-08	1.0335e-08	0.0221945	1	0.244399
rs599136	10:112823415	A:0.0599487	rs6573817	14:68617269	G:0.317756	17932	6651	5	1	0.0222445	1.74622e-05	-0.230207	0.0535976	0.000188396	0.114321	0.0306154	0.100032	-0.118503	0.0720516	2.81699e-05	0.132509	0.0316418	0.0226738	-0.166966	0.0732666	7.90239e-08	2.91947e-08	0.0222445	1	0.244473
rs10787472	10:114781297	A:0.452187	rs12255372	10:114808902	T:0.284468	18060	6706	5	1	0.0225717	0.401673	-0.0258815	0.0308614	2.42844e-10	0.205496	0.0324564	0.0903577	-0.0572431	0.0338014	5.66528e-05	0.156625	0.0389002	0.0225446	0.100545	0.044078	2.00964e-15	1.02989e-15	0.0225717	1	0.247468
chr10:114772253:i	10:114772253	C:0.449012	rs35748167	18:58037433	G:0.168563	18014	6679	5	1	0.0226224	1.67724e-07	-0.134908	0.0257854	7.9613e-09	-0.258533	0.044812	0.000134648	-0.108129	0.0283225	0.0017746	-0.17803	0.0569592	0.0227708	-0.0767468	0.0337014	3.20248e-14	1.58237e-14	0.0226224	1	0.247468
rs1522812	2:226997454	A:0.361722	rs11196205	10:114807047	G:0.456646	17830	6591	5	1	0.0226479	5.84573e-05	0.107338	0.0267078	5.57589e-08	-0.140066	0.0257859	1.93725e-05	0.185116	0.0433324	0.0362313	-0.0782974	0.0373855	0.0227284	-0.078698	0.0345474	1.18229e-10	5.10762e-11	0.0226479	1	0.247468
rs2943645	2:227099180	C:0.35599	rs849142	7:28185891	C:0.413185	18096	6709	5	1	0.0227499	2.27617e-08	-0.143218	0.0256224	6.73369e-06	-0.116615	0.0259032	0.0518398	-0.0759448	0.039057	0.0924956	-0.0602322	0.0358018	0.0228523	-0.0814811	0.0358018	5.6996e-12	2.60966e-12	0.0227499	1	0.248105
rs4132670	10:114767771	A:0.396467	rs4919764	12:53272051	G:0.428639	17888	6636	5	1	0.0230071	4.20745e-19	0.234462	0.0262515	1.17935e-05	0.112264	0.0256229	2.91692e-14	0.302265	0.0397615	3.55969e-06	0.175794	0.037923	0.0230416	-0.0776539	0.0341675	1.25997e-22	7.88541e-23	0.0230071	1	0.249949
rs10885409	10:114808072	T:0.456344	rs4148475	13:95853574	T:0.247802	17970	6665	5	1	0.0230071	7.42504e-08	-0.138271	0.0256983	5.31171e-06	-0.161446	0.0354664	0.00100407	-0.10056	0.030571	0.0618936	-0.0889781	0.0476569	0.0231102	-0.0713626	0.031415	7.46278e-12	3.4341e-12	0.0230071	1	0.249949
rs6604661	1:217409199	T:0.274543	rs4919764	12:53272051	G:0.427781	17897	6642	5	1	0.0233722	4.44277e-05	-0.113877	0.0278895	4.4979e-06	0.117201	0.025551	0.325219	-0.0415883	0.0422736	6.32288e-07	0.164755	0.0330762	0.023409	-0.0883701	0.0389863	5.41453e-09	2.22197e-09	0.0233722	1	0.25343
rs7899529	10:114779538	G:0.452481	rs12255372	10:114808902	T:0.284558	18035	6688	5	1	0.0235041	0.457249	-0.0229831	0.0309169	2.44467e-10	0.205731	0.0324987	0.109645	-0.0541664	0.0338584	5.5052e-05	0.157112	0.0389559	0.02349	0.0998819	0.0440907	3.53393e-15	1.86077e-15	0.0235041	1	0.254373
rs6436602	2:227005350	G:0.366652	rs12718338	10:114813047	C:0.457325	17938	6650	5	1	0.0236367	5.83654e-05	0.106668	0.0265388	2.04249e-08	-0.144202	0.0257119	2.04916e-05	0.183384	0.0430533	0.0274077	-0.0825631	0.0374324	0.0237066	-0.0776441	0.0343277	4.31977e-11	1.97194e-11	0.0236367	1	0.255322
rs2713539	2:227137125	T:0.347264	rs17866193	4:118392862	C:0.442335	18018	6675	5	1	0.0237167	3.22884e-08	-0.14255	0.0257844	3.65177e-06	0.117853	0.0254528	0.0859301	-0.0703622	0.0409734	9.05777e-07	0.172651	0.0351554	0.0237823	-0.0804998	0.0356095	4.24386e-12	2.02345e-12	0.0237167	1	0.255698
rs117537110	6:30649931	G:0.447512	rs2187659	16:19508573	A:0.338751	18090	6710	5	1	0.0239582	6.81447e-07	0.611061	0.123035	3.01456e-05	-0.111962	0.0268342	1.84916e-07	0.646442	0.123984	0.109422	-0.0576103	0.0359886	0.0239777	-0.0603613	0.0267383	5.92842e-10	2.60344e-10	0.0239582	1	0.256837
rs117537110	6:30649931	G:0.447512	rs2187660	16:19508583	C:0.338751	18090	6710	5	1	0.0239582	6.81447e-07	0.611061	0.123035	3.01456e-05	-0.111962	0.0268342	1.84916e-07	0.646442	0.123984	0.109422	-0.0576103	0.0359886	0.0239777	-0.0603613	0.0267383	5.92842e-10	2.60344e-10	0.0239582	1	0.256837
rs117537110	6:30649931	G:0.447543	rs2521791	16:19508824	C:0.33876	18091	6710	5	1	0.0239582	6.82362e-07	0.611035	0.123036	3.02285e-05	-0.111947	0.0268347	1.8521e-07	0.646412	0.123986	0.109467	-0.0576033	0.0359887	0.023996	-0.0603548	0.0267389	5.95162e-10	2.61343e-10	0.0239582	1	0.256837
rs6997996	8:25891653	G:0.278301	rs10885406	10:114777724	A:0.452642	17959	6635	5	1	0.0242296	6.02307e-05	-0.111775	0.0278608	2.55617e-07	-0.13249	0.0257085	1.69534e-05	-0.186285	0.0433055	5.11641e-08	-0.177463	0.0325787	0.0242028	0.0843393	0.0374194	3.03682e-10	1.36449e-10	0.0242296	1	0.259256
rs10885409	10:114808072	T:0.456287	rs12255372	10:114808902	T:0.285996	17981	6672	5	1	0.0246704	0.500956	-0.0216465	0.0321648	5.65515e-10	0.20979	0.0338384	0.155774	-0.0488104	0.0343873	2.55019e-05	0.165222	0.0392422	0.0246514	0.103923	0.0462534	1.15404e-15	6.42913e-16	0.0246704	1	0.26308
rs3821757	3:10948564	G:0.484876	rs117537110	6:30649931	G:0.449606	18018	6654	5	1	0.0247261	3.79517e-06	-0.14754	0.0319192	6.44943e-07	0.612102	0.12298	5.62307e-07	-0.203714	0.0407124	4.60369e-06	0.571602	0.124747	0.024942	0.0723079	0.0322472	7.88344e-11	3.69809e-11	0.0247261	1	0.26308
rs1522812	2:226997454	A:0.361748	rs10885409	10:114808072	T:0.456523	17837	6593	5	1	0.0247261	5.71917e-05	0.107465	0.0267054	5.38434e-08	-0.140213	0.0257832	2.14266e-05	0.184077	0.0433176	0.033893	-0.0793189	0.0373909	0.0247724	-0.0775305	0.0345357	1.12375e-10	5.23645e-11	0.0247261	1	0.26308
rs117537110	6:30649931	G:0.446674	rs2856611	16:19507199	G:0.33861	18068	6699	5	1	0.0250347	6.72752e-07	0.611361	0.123033	2.6527e-05	-0.112835	0.0268566	1.84307e-07	0.646533	0.123987	0.101176	-0.058976	0.035979	0.025048	-0.0599621	0.0267609	5.17086e-10	2.36361e-10	0.0250347	1	0.265865
rs7821832	8:25889446	G:0.301433	rs11196205	10:114807047	G:0.457202	17863	6600	5	1	0.0255195	0.000407565	-0.0978597	0.027682	7.26933e-08	-0.138711	0.0257618	6.59393e-05	-0.170059	0.0426161	2.32511e-08	-0.185198	0.0331546	0.0255299	0.0820264	0.036729	6.37892e-10	2.95109e-10	0.0255195	1	0.269804
rs6997996	8:25891653	G:0.27805	rs12258200	10:114781698	T:0.450047	17977	6651	5	1	0.0255195	5.78366e-05	-0.111969	0.0278428	9.54763e-08	-0.13766	0.0258026	1.71155e-05	-0.185148	0.0430622	2.36048e-08	-0.182082	0.0326121	0.025484	0.0834676	0.0373626	1.12156e-10	5.36853e-11	0.0255195	1	0.269804
rs6997996	8:25891653	G:0.278025	rs10787473	10:114781400	C:0.452828	17966	6646	5	1	0.0255484	5.86563e-05	-0.11193	0.0278562	2.18283e-07	-0.133202	0.0256994	1.79064e-05	-0.185857	0.0433282	4.80488e-08	-0.177754	0.0325654	0.0254909	0.0836124	0.0374292	2.52994e-10	1.19333e-10	0.0255484	1	0.269804
rs1562692	3:34534267	G:0.120393	rs4132670	10:114767771	A:0.397006	17933	6651	5	1	0.0258677	7.08296e-05	0.219098	0.05514	1.99876e-19	0.236448	0.0262331	5.08408e-06	0.290042	0.0635877	5.16148e-20	0.26144	0.0285396	0.0258675	-0.0938935	0.0421388	8.24822e-22	5.60812e-22	0.0258677	1	0.272668
rs7918599	10:114777396	C:0.449499	rs35748167	18:58037433	G:0.168403	18049	6696	5	1	0.0261025	1.28696e-07	-0.135894	0.0257342	6.50179e-09	-0.260003	0.0448026	0.000103769	-0.109758	0.0282765	0.00141232	-0.181639	0.0569023	0.0262561	-0.0746053	0.0335697	2.01387e-14	1.13197e-14	0.0261025	1	0.274633
rs12265291	10:114810240	T:0.449306	rs1729752	13:95732362	G:0.297446	18089	6705	5	1	0.0262503	1.11808e-08	-0.14728	0.0257853	6.53832e-08	-0.167832	0.0310603	0.00034684	-0.110004	0.0307484	0.00404954	-0.113543	0.0395033	0.0263765	-0.0665534	0.0299706	2.64977e-14	1.49071e-14	0.0262503	1	0.275677
rs6997996	8:25891653	G:0.278013	rs10787472	10:114781297	A:0.452737	17974	6651	5	1	0.0263395	6.34675e-05	-0.111392	0.0278512	2.3808e-07	-0.132758	0.0256942	1.96997e-05	-0.18489	0.0433174	5.38122e-08	-0.177046	0.0325559	0.0263132	0.0831384	0.0374234	2.96647e-10	1.4314e-10	0.0263395	1	0.275904
rs1562692	3:34534267	G:0.120806	rs6585201	10:114768783	G:0.467256	17942	6656	5	1	0.0263693	6.34209e-05	0.220399	0.0551038	6.1987e-09	-0.148146	0.0254926	0.0766024	0.124182	0.0701294	5.10975e-10	-0.171315	0.0275616	0.0264558	0.0981937	0.0442423	1.69495e-11	8.63558e-12	0.0263693	1	0.275904
rs1824332	4:128668850	C:0.478098	rs7483053	11:56340724	T:0.169005	18035	6691	5	1	0.0264289	7.88155e-07	0.221887	0.044932	2.75186e-05	-0.141312	0.0337013	1.25011e-07	0.242744	0.0459219	0.130181	-0.0701656	0.0463633	0.0264884	-0.0752368	0.0339061	5.0363e-10	2.41158e-10	0.0264289	1	0.276019
rs6997996	8:25891653	G:0.27813	rs11196191	10:114780633	A:0.449942	17979	6652	5	1	0.0266088	6.08072e-05	-0.111642	0.0278433	9.3494e-08	-0.137752	0.0258013	1.86798e-05	-0.184214	0.0430395	2.45709e-08	-0.18184	0.0326096	0.0265914	0.0828271	0.0373522	1.16282e-10	5.76294e-11	0.0266088	1	0.277296
rs1824332	4:128668850	C:0.478115	rs12288760	11:56333753	C:0.168929	18049	6697	5	1	0.0266992	7.88881e-07	0.221878	0.0449319	2.80676e-05	-0.141112	0.0336896	1.25745e-07	0.242687	0.0459205	0.130415	-0.0701019	0.0463493	0.0267394	-0.0750835	0.0338931	5.13062e-10	2.47707e-10	0.0266992	1	0.277296
rs117537110	6:30649931	G:0.447432	rs1475962	16:19503598	C:0.33887	18091	6706	5	1	0.026881	6.47492e-07	0.61234	0.123047	2.47036e-05	-0.113171	0.0268336	1.80749e-07	0.647038	0.123998	0.095966	-0.0599031	0.0359836	0.0268867	-0.0591749	0.0267378	4.65781e-10	2.26615e-10	0.026881	1	0.277296
rs117537110	6:30649931	G:0.447432	rs1967952	16:19503828	T:0.33887	18091	6706	5	1	0.026881	6.47492e-07	0.61234	0.123047	2.47036e-05	-0.113171	0.0268336	1.80749e-07	0.647038	0.123998	0.095966	-0.0599031	0.0359836	0.0268867	-0.0591749	0.0267378	4.65781e-10	2.26615e-10	0.026881	1	0.277296
rs1522812	2:226997454	A:0.362145	rs11196208	10:114811316	T:0.457008	17794	6573	5	1	0.0269114	6.74835e-05	0.106539	0.0267351	3.48503e-08	-0.142442	0.0258274	2.69328e-05	0.182196	0.0434011	0.0278403	-0.0823686	0.0374483	0.0269926	-0.0765193	0.0345987	8.63293e-11	4.34405e-11	0.0269114	1	0.277296
rs74987670	10:112820864	G:0.0595698	rs1555944	14:68625118	G:0.321207	17853	6634	5	1	0.0269724	1.12148e-05	-0.236727	0.0538956	0.000265444	0.111432	0.0305556	0.0774342	-0.127986	0.0724815	4.40123e-05	0.129039	0.0315859	0.0274482	-0.162633	0.0737535	7.10444e-08	3.09698e-08	0.0269724	1	0.277296
rs4132670	10:114767771	A:0.39695	rs10885405	10:114777670	C:0.461545	17904	6639	5	1	0.0270335	3.79663e-13	0.271758	0.0374188	0.133018	0.0546113	0.0363517	3.54103e-08	0.230448	0.0418059	0.629002	0.019196	0.0397323	0.0270173	0.0871967	0.0394329	3.44378e-18	2.228e-18	0.0270335	1	0.277296
rs74987670	10:112820864	G:0.0595477	rs8011527	14:68638685	A:0.319101	17952	6649	5	1	0.0271254	1.08566e-05	-0.236277	0.053707	0.000329981	0.109995	0.0306345	0.0751715	-0.128347	0.0721286	5.6409e-05	0.127452	0.0316467	0.0275896	-0.162098	0.0735781	8.40384e-08	3.66531e-08	0.0271254	1	0.277296
rs117537110	6:30649931	G:0.447463	rs1475964	16:19505406	T:0.338851	18092	6708	5	1	0.0271561	6.51864e-07	0.61218	0.123047	2.39822e-05	-0.113348	0.0268333	1.82582e-07	0.646806	0.123998	0.0944032	-0.0601858	0.0359831	0.0271866	-0.0590579	0.0267372	4.55881e-10	2.23813e-10	0.0271561	1	0.277296
rs117537110	6:30649931	G:0.447463	rs2245423	16:19505730	T:0.338851	18092	6708	5	1	0.0271561	6.51864e-07	0.61218	0.123047	2.39822e-05	-0.113348	0.0268333	1.82582e-07	0.646806	0.123998	0.0944032	-0.0601858	0.0359831	0.0271866	-0.0590579	0.0267372	4.55881e-10	2.23813e-10	0.0271561	1	0.277296
rs117537110	6:30649931	G:0.447463	rs1475963	16:19505282	G:0.338851	18092	6708	5	1	0.0271561	6.51864e-07	0.61218	0.123047	2.39822e-05	-0.113348	0.0268333	1.82582e-07	0.646806	0.123998	0.0944032	-0.0601858	0.0359831	0.0271866	-0.0590579	0.0267372	4.55881e-10	2.23813e-10	0.0271561	1	0.277296
rs117537110	6:30649931	G:0.447463	rs4421962	16:19505852	C:0.338851	18092	6708	5	1	0.0271561	6.51864e-07	0.61218	0.123047	2.39822e-05	-0.113348	0.0268333	1.82582e-07	0.646806	0.123998	0.0944032	-0.0601858	0.0359831	0.0271866	-0.0590579	0.0267372	4.55881e-10	2.23813e-10	0.0271561	1	0.277296
rs6604661	1:217409199	T:0.275321	rs2972152	2:227066574	A:0.280029	17841	6624	5	1	0.0271868	2.38697e-05	-0.117921	0.0279088	8.44575e-07	-0.137367	0.027893	0.0833578	-0.0640826	0.0370093	0.0209579	-0.0846503	0.0366651	0.0274548	-0.0937541	0.0425191	5.89378e-10	2.88134e-10	0.0271868	1	0.277296
rs11228658	11:56335596	T:0.168931	rs10860059	12:97046476	G:0.259032	17963	6654	5	1	0.0273102	2.91193e-05	-0.141353	0.0338145	1.91088e-05	-0.123328	0.0288483	0.0405701	-0.0860805	0.0420336	0.00791085	-0.0876882	0.033017	0.0279343	-0.11923	0.0542397	1.3786e-08	6.31847e-09	0.0273102	1	0.277687
rs7483053	11:56340724	T:0.16896	rs10860059	12:97046476	G:0.259178	17951	6649	5	1	0.0273721	2.67834e-05	-0.142045	0.0338266	1.78098e-05	-0.123799	0.0288528	0.0390755	-0.0867684	0.0420514	0.00758009	-0.0881741	0.0330212	0.0280081	-0.119211	0.0542565	1.19308e-08	5.49699e-09	0.0273721	1	0.277687
rs11196205	10:114807047	G:0.456437	rs12255372	10:114808902	T:0.286024	17974	6670	5	1	0.0273721	0.55369	-0.01905	0.0321661	3.88703e-10	0.211826	0.0338462	0.183522	-0.0457369	0.034389	1.86199e-05	0.168034	0.0392527	0.0273359	0.102051	0.0462463	1.07779e-15	6.56689e-16	0.0273721	1	0.277687
rs1824332	4:128668850	C:0.478113	rs11228658	11:56335596	T:0.168948	18047	6696	5	1	0.0275274	7.96925e-07	0.221789	0.0449319	2.88094e-05	-0.140915	0.0336902	1.28754e-07	0.242489	0.0459207	0.129417	-0.0702867	0.0463508	0.0275688	-0.0746808	0.0338939	5.31939e-10	2.63351e-10	0.0275274	1	0.278765
rs12288760	11:56333753	C:0.168912	rs10860059	12:97046476	G:0.259031	17965	6655	5	1	0.0277465	2.83456e-05	-0.141558	0.033814	1.85143e-05	-0.123529	0.0288477	0.0397163	-0.0864481	0.0420327	0.00769395	-0.0879948	0.033016	0.0283913	-0.118885	0.05424	1.30396e-08	6.06455e-09	0.0277465	1	0.280482
rs117537110	6:30649931	G:0.447402	rs2856609	16:19506773	G:0.338806	18090	6707	5	1	0.0280944	6.5368e-07	0.612111	0.123046	2.53786e-05	-0.113011	0.0268345	1.84739e-07	0.646534	0.123998	0.0944956	-0.0601686	0.0359829	0.0281111	-0.0587116	0.026739	4.82448e-10	2.43477e-10	0.0280944	1	0.282808
rs117537110	6:30649931	G:0.447402	rs2856610	16:19507031	T:0.338806	18090	6707	5	1	0.0280944	6.5368e-07	0.612111	0.123046	2.53786e-05	-0.113011	0.0268345	1.84739e-07	0.646534	0.123998	0.0944956	-0.0601686	0.0359829	0.0281111	-0.0587116	0.026739	4.82448e-10	2.43477e-10	0.0280944	1	0.282808
rs6997996	8:25891653	G:0.278235	rs7918599	10:114777396	C:0.45007	17965	6642	5	1	0.0281262	5.75913e-05	-0.112044	0.0278546	1.40397e-07	-0.135798	0.0257939	1.92642e-05	-0.183891	0.043033	3.68123e-08	-0.179421	0.0325893	0.028058	0.0819968	0.0373311	1.64948e-10	8.51049e-11	0.0281262	1	0.282808
rs117537110	6:30649931	G:0.447463	rs2353696	16:19505813	T:0.338907	18092	6708	5	1	0.0282861	6.52456e-07	0.612161	0.123047	2.22175e-05	-0.113821	0.026836	1.84676e-07	0.646551	0.124	0.0899813	-0.061021	0.0359901	0.0282981	-0.0586436	0.0267397	4.23685e-10	2.15614e-10	0.0282861	1	0.28341
rs599136	10:112823415	A:0.0599653	rs1555944	14:68625118	G:0.321056	17852	6635	5	1	0.0282861	1.41783e-05	-0.23308	0.0536917	0.000237323	0.112315	0.0305572	0.084041	-0.125072	0.0723919	3.95553e-05	0.129867	0.0315973	0.0287409	-0.159973	0.0731466	8.02683e-08	3.63059e-08	0.0282861	1	0.28341
rs599136	10:112823415	A:0.0599409	rs8011527	14:68638685	A:0.318952	17951	6650	5	1	0.0284146	1.3712e-05	-0.232661	0.0535047	0.000295375	0.110882	0.0306362	0.0815752	-0.125466	0.0720398	5.07403e-05	0.128284	0.0316579	0.028899	-0.159433	0.0729718	9.50422e-08	4.29669e-08	0.0284146	1	0.284018
rs11196205	10:114807047	G:0.456404	rs35748167	18:58037433	G:0.170487	17972	6669	5	1	0.0284468	7.46787e-08	-0.138203	0.0256905	6.19673e-09	-0.260414	0.0448112	6.95869e-05	-0.11238	0.0282526	0.00129178	-0.183168	0.0569234	0.0286037	-0.0737163	0.0336772	1.16782e-14	7.11725e-15	0.0284468	1	0.284018
rs7821832	8:25889446	G:0.301492	rs12718338	10:114813047	C:0.458083	17833	6584	5	1	0.0285114	0.000389069	-0.0983294	0.0277188	3.17176e-08	-0.142729	0.0258021	7.35724e-05	-0.169418	0.0427347	1.40038e-08	-0.188404	0.0332087	0.0284912	0.0806583	0.0368226	2.67737e-10	1.38423e-10	0.0285114	1	0.284162
rs6436602	2:227005350	G:0.365839	rs621010	11:102353911	G:0.134078	17997	6673	5	1	0.0287386	2.88116e-05	0.11083	0.0264976	0.116668	-0.0583614	0.0371986	0.00397811	0.0840847	0.0291972	0.00848165	-0.134079	0.0509367	0.0286552	0.112627	0.0514703	4.96677e-05	1.86869e-05	0.0287386	1	0.285747
rs4132670	10:114767771	A:0.396651	rs6585202	10:114782803	T:0.461848	17915	6651	5	1	0.0287712	3.68014e-13	0.271182	0.0373178	0.147343	0.0525021	0.0362338	3.53329e-08	0.230157	0.0417501	0.663249	0.0172705	0.0396629	0.0287348	0.0860924	0.0393636	2.56922e-18	1.75871e-18	0.0287712	1	0.285747
rs10787473	10:114781400	C:0.452244	rs35748167	18:58037433	G:0.169114	18050	6700	5	1	0.0289021	2.11896e-07	-0.133032	0.0256393	4.78352e-09	-0.262713	0.0448735	0.000136624	-0.107457	0.0281728	0.00113462	-0.185561	0.0570112	0.0290587	-0.0732561	0.0335623	2.37988e-14	1.45526e-14	0.0289021	1	0.286545
rs4132670	10:114767771	A:0.3973	rs6585201	10:114768783	G:0.466741	17965	6657	5	1	0.0293316	3.09823e-12	0.264356	0.0379104	0.263419	0.0412883	0.0369191	1.08546e-07	0.224015	0.0421731	0.86212	0.00697256	0.0401469	0.0293177	0.0856217	0.0392906	2.44678e-18	1.70356e-18	0.0293316	1	0.290296
rs7708975	5:132650567	T:0.0961795	rs11158715	14:68489386	T:0.306225	18008	6686	5	1	0.0297677	0.000350519	-0.153498	0.0429391	0.000209448	0.10723	0.0289238	0.324246	-0.0597509	0.0606135	2.14479e-05	0.132231	0.0311186	0.0298087	-0.121579	0.0559597	1.56875e-06	6.82362e-07	0.0297677	1	0.294099
rs117537110	6:30649931	G:0.447262	rs1967951	16:19503773	T:0.338496	18080	6702	5	1	0.0302106	6.58787e-07	0.612121	0.123085	3.54608e-05	-0.111012	0.0268456	1.90153e-07	0.646069	0.124036	0.101947	-0.0588661	0.0359929	0.0302565	-0.0579696	0.0267546	6.60072e-10	3.5191e-10	0.0302106	1	0.297956
rs10195178	2:227199263	T:0.428163	rs6585201	10:114768783	G:0.466526	17999	6674	5	1	0.0303138	1.75577e-06	0.119871	0.0250793	1.57011e-08	-0.143883	0.0254492	3.19313e-06	0.188782	0.0405286	0.0472337	-0.0783733	0.0394987	0.0303691	-0.0738236	0.0340948	1.07827e-12	6.47724e-13	0.0303138	1	0.298454
rs1562692	3:34534267	G:0.121228	rs10787473	10:114781400	C:0.452987	17995	6683	5	1	0.030452	8.06477e-05	0.216663	0.0549563	7.88976e-08	-0.137798	0.0256624	0.0776741	0.123327	0.0698997	7.207e-09	-0.160136	0.0276764	0.0305359	0.0975966	0.0451195	2.41408e-10	1.32206e-10	0.030452	1	0.299295
rs1562692	3:34534267	G:0.121331	rs10885406	10:114777724	A:0.452802	17988	6672	5	1	0.0306604	7.60023e-05	0.217452	0.0549582	9.23123e-08	-0.13712	0.025672	0.0755938	0.124214	0.069907	8.47733e-09	-0.15944	0.0276869	0.0307501	0.0974699	0.0451188	2.67737e-10	1.47169e-10	0.0306604	1	0.300801
rs1562692	3:34534267	G:0.121174	rs10787472	10:114781297	A:0.452897	18003	6688	5	1	0.0307652	8.07187e-05	0.216653	0.0549567	8.60072e-08	-0.13737	0.0256573	0.0772391	0.123509	0.0699003	7.93084e-09	-0.159653	0.0276699	0.0308819	0.0973953	0.0451198	2.63329e-10	1.4521e-10	0.0307652	1	0.300801
rs10195178	2:227199263	T:0.427818	rs7896811	10:114766717	T:0.13942	18100	6708	5	1	0.0308002	1.09617e-06	0.121991	0.0250313	9.42732e-06	-0.157658	0.0355896	0.00110297	0.0928136	0.0284455	9.68766e-06	-0.254921	0.057622	0.0307717	0.10997	0.0509117	3.90698e-10	2.1397e-10	0.0308002	1	0.300801
rs4148475	13:95853574	T:0.246431	rs2856611	16:19507199	G:0.338794	18070	6699	5	1	0.0308704	2.92786e-06	-0.165632	0.0354232	3.34845e-05	-0.111346	0.0268409	2.75406e-07	-0.205846	0.0400514	3.36176e-06	-0.149237	0.032112	0.0308996	0.0694629	0.0321831	2.65693e-09	1.40081e-09	0.0308704	1	0.300801
rs6997996	8:25891653	G:0.277787	rs7904519	10:114773927	A:0.450613	17940	6630	5	1	0.0308704	8.13113e-05	-0.109924	0.027896	1.18921e-07	-0.136644	0.0258055	2.77371e-05	-0.180722	0.0431184	3.68467e-08	-0.179643	0.0326307	0.0308316	0.0807675	0.0374056	1.99354e-10	1.10851e-10	0.0308704	1	0.300801
rs11196191	10:114780633	A:0.449429	rs4148475	13:95853574	T:0.245984	18054	6700	5	1	0.0309407	1.13099e-07	-0.136552	0.0257436	4.69963e-06	-0.16242	0.0354802	0.000978094	-0.100836	0.0305865	0.049215	-0.0937008	0.0476431	0.0310081	-0.0677027	0.0313879	9.64812e-12	5.68363e-12	0.0309407	1	0.300969
rs11196205	10:114807047	G:0.456494	rs4148475	13:95853574	T:0.247759	17963	6663	5	1	0.0311172	9.96434e-08	-0.13688	0.0256937	4.73215e-06	-0.162366	0.0354795	0.000939904	-0.101117	0.0305682	0.049601	-0.0936115	0.0476785	0.0312216	-0.0676636	0.0314096	9.01942e-12	5.34509e-12	0.0311172	1	0.302167
rs12258200	10:114781698	T:0.449535	rs4148475	13:95853574	T:0.245984	18052	6699	5	1	0.0311881	1.14265e-07	-0.13651	0.0257447	4.96959e-06	-0.161987	0.0354763	0.00097825	-0.100843	0.030589	0.0500219	-0.0933685	0.0476424	0.0312718	-0.0675976	0.0313882	1.03106e-11	6.10772e-12	0.0311881	1	0.302338
rs4919764	12:53272051	G:0.427801	rs10746051	12:106256437	C:0.32642	17888	6638	5	1	0.0316171	6.89168e-07	0.127055	0.0255933	3.49383e-06	0.122547	0.0264142	3.9447e-07	0.179625	0.0354178	3.40534e-06	0.189259	0.0407471	0.0316405	-0.0796292	0.0370554	1.42333e-10	8.1281e-11	0.0316171	1	0.305973
rs1875574	1:217403246	G:0.275426	rs2972152	2:227066574	A:0.280102	17856	6630	5	1	0.0319792	2.40373e-05	-0.117811	0.0278932	6.71214e-07	-0.138549	0.0278798	0.0768909	-0.0654778	0.0370137	0.0171804	-0.0873482	0.0366574	0.0322283	-0.0909651	0.042476	4.67604e-10	2.63351e-10	0.0319792	1	0.308253
rs4148475	13:95853574	T:0.246336	rs2856608	16:19505751	G:0.335417	18079	6699	5	1	0.0319792	2.9184e-06	-0.165716	0.0354361	2.64362e-05	-0.112681	0.026815	2.83098e-07	-0.205453	0.0400153	2.80434e-06	-0.150285	0.0320803	0.0319954	0.0691081	0.0322262	2.14117e-09	1.16826e-09	0.0319792	1	0.308253
rs10787472	10:114781297	A:0.452154	rs35748167	18:58037433	G:0.169482	18058	6705	5	1	0.0320157	2.30479e-07	-0.132603	0.0256341	4.79077e-09	-0.262708	0.0448744	0.00013613	-0.107483	0.028173	0.00103007	-0.187067	0.0569946	0.0322056	-0.0718147	0.0335293	2.59345e-14	1.72721e-14	0.0320157	1	0.308253
rs6997996	8:25891653	G:0.278316	rs7899529	10:114779538	G:0.453006	17949	6633	5	1	0.0321619	4.9182e-05	-0.11311	0.0278632	4.0919e-07	-0.130287	0.0257249	2.16556e-05	-0.183994	0.0433223	1.09433e-07	-0.173002	0.0325785	0.0321429	0.0802081	0.0374344	4.01137e-10	2.27702e-10	0.0321619	1	0.308965
rs6677242	1:217398785	A:0.276983	rs2972152	2:227066574	A:0.279984	17826	6620	5	1	0.0321986	2.3474e-05	-0.117852	0.0278675	3.42865e-07	-0.142295	0.0279108	0.0754653	-0.0657049	0.0369621	0.013351	-0.0909356	0.0367525	0.0324869	-0.0908018	0.0424631	2.35356e-10	1.35149e-10	0.0321986	1	0.308965
rs117537110	6:30649931	G:0.447243	rs62026181	16:19506239	T:0.335923	18083	6706	5	1	0.0324565	6.51376e-07	0.612239	0.123055	4.08209e-05	-0.110081	0.0268309	1.91878e-07	0.645704	0.124006	0.105045	-0.0584201	0.0360424	0.0324665	-0.0572183	0.0267548	7.57516e-10	4.27736e-10	0.0324565	1	0.310744
rs6997996	8:25891653	G:0.278233	chr10:114772253:i	10:114772253	C:0.449612	17931	6626	5	1	0.0324936	5.19979e-05	-0.112881	0.0278962	1.9045e-07	-0.134614	0.0258454	2.18345e-05	-0.182923	0.0430889	5.79013e-08	-0.177218	0.0326659	0.0324558	0.0800793	0.0374421	2.01704e-10	1.17069e-10	0.0324936	1	0.310744
rs1502364	1:217392174	G:0.275348	rs2972152	2:227066574	A:0.280186	17881	6637	5	1	0.0326421	1.59545e-05	-0.120312	0.0278817	5.65693e-07	-0.139372	0.02786	0.0653943	-0.0681835	0.0370049	0.015794	-0.0884129	0.0366305	0.0329059	-0.0905206	0.0424336	2.64102e-10	1.5306e-10	0.0326421	1	0.311135
rs1056750	7:73095370	G:0.389937	rs621010	11:102353911	G:0.133486	17867	6611	5	1	0.0327166	0.00302434	-0.0750691	0.0253163	0.144841	-0.0545229	0.0373958	0.117786	-0.0452132	0.0289062	0.547709	0.0333637	0.0554954	0.0328898	-0.113044	0.0529871	0.00414708	0.0014146	0.0327166	1	0.311135
rs10885406	10:114777724	A:0.452059	rs35748167	18:58037433	G:0.168265	18043	6689	5	1	0.032754	2.45334e-07	-0.132375	0.025648	5.75124e-09	-0.261139	0.0448398	0.000136056	-0.107462	0.0281665	0.00112871	-0.185657	0.0570147	0.0329451	-0.071739	0.0336368	3.35289e-14	2.26792e-14	0.032754	1	0.311135
rs905293	1:217405444	T:0.27541	rs2972152	2:227066574	A:0.280058	17857	6628	5	1	0.032754	2.06725e-05	-0.118771	0.0278969	7.47905e-07	-0.137965	0.0278803	0.0714535	-0.0667085	0.0370071	0.0176244	-0.0870027	0.0366572	0.0330297	-0.0905505	0.0424776	4.51451e-10	2.59598e-10	0.032754	1	0.311135
rs4148423	13:95931595	C:0.478325	rs35748167	18:58037433	G:0.16862	18085	6702	5	1	0.0330165	0.697947	0.0324694	0.0836639	0.00377075	-0.234936	0.0811039	0.111569	0.165717	0.104147	0.391357	-0.0903118	0.105362	0.0338146	-0.176598	0.0832119	2.55802e-08	1.35479e-08	0.0330165	1	0.313105
rs10885406	10:114777724	A:0.451957	rs11158715	14:68489386	T:0.306435	17932	6656	5	1	0.0331676	9.96872e-08	-0.137001	0.0257169	0.000134529	0.110627	0.028975	3.44134e-08	-0.179082	0.032458	0.27737	0.0456847	0.0420575	0.0331462	0.0758398	0.0356004	5.91685e-10	3.41954e-10	0.0331676	1	0.314012
rs7904519	10:114773927	A:0.450153	rs4148475	13:95853574	T:0.245795	18015	6678	5	1	0.0339724	1.4131e-07	-0.135518	0.0257465	5.85623e-06	-0.160704	0.0354637	0.00102563	-0.100433	0.0305882	0.0500392	-0.0932818	0.0476018	0.034073	-0.0665765	0.0314158	1.60162e-11	1.01165e-11	0.0339724	1	0.320928
rs6997996	8:25891653	G:0.277883	rs8011527	14:68638685	A:0.31954	17968	6637	5	1	0.0340112	3.54293e-05	-0.115225	0.0278628	0.000397184	0.108482	0.0306277	0.0953534	-0.0622925	0.0373499	3.75608e-05	0.152092	0.0368977	0.0341128	-0.0784188	0.0370121	3.18088e-07	1.61841e-07	0.0340112	1	0.320928
rs10787473	10:114781400	C:0.452143	rs11158715	14:68489386	T:0.306399	17939	6667	5	1	0.0342452	8.40958e-08	-0.137744	0.0257076	0.00014161	0.110246	0.0289713	3.14842e-08	-0.179585	0.0324573	0.278206	0.0456318	0.0420819	0.0342626	0.0753771	0.0356062	5.30383e-10	3.1555e-10	0.0342452	1	0.322432
rs4148475	13:95853574	T:0.246355	rs2074172	16:19529042	A:0.340263	18039	6686	5	1	0.0342843	3.62648e-06	-0.164147	0.0354398	3.17184e-05	-0.111845	0.0268808	3.75761e-07	-0.203707	0.040093	3.56361e-06	-0.149008	0.0321462	0.0342972	0.0682107	0.0322271	3.13369e-09	1.79746e-09	0.0342843	1	0.322432
rs1562692	3:34534267	G:0.121371	rs7899529	10:114779538	G:0.453193	17978	6670	5	1	0.0343628	7.34885e-05	0.217926	0.0549665	1.5416e-07	-0.134801	0.0256885	0.0702898	0.126584	0.0699345	1.5598e-08	-0.156665	0.0277045	0.0344621	0.0954166	0.0451223	4.27425e-10	2.56144e-10	0.0343628	1	0.322635
rs10195178	2:227199263	T:0.428388	rs114863326	10:114783775	C:0.139155	17944	6648	5	1	0.0346388	1.73634e-06	0.120257	0.0251482	6.49128e-06	-0.161497	0.0358109	0.00134126	0.0916197	0.0285686	9.40455e-06	-0.257782	0.0581844	0.0345781	0.108214	0.0512072	4.40132e-10	2.65374e-10	0.0346388	1	0.324524
rs1824332	4:128668850	C:0.477656	rs35748167	18:58037433	G:0.169543	18081	6708	5	1	0.0346785	0.625124	0.0365706	0.0748475	0.0018372	-0.231615	0.0743462	0.101167	0.151877	0.0926516	0.278131	-0.103845	0.0957517	0.0353287	-0.159424	0.0757514	2.67034e-08	1.4719e-08	0.0346785	1	0.324524
rs10787473	10:114781400	C:0.452331	rs4148475	13:95853574	T:0.246078	18041	6694	5	1	0.0348773	2.80404e-07	-0.131696	0.025641	4.47679e-06	-0.162777	0.0354794	0.00145668	-0.0969523	0.0304577	0.045155	-0.095502	0.0476746	0.0349888	-0.066106	0.0313523	2.26306e-11	1.4523e-11	0.0348773	1	0.324777
rs10787472	10:114781297	A:0.452053	rs11158715	14:68489386	T:0.306346	17947	6672	5	1	0.0348773	9.12422e-08	-0.137337	0.0257025	0.00013985	0.110322	0.0289678	3.44382e-08	-0.179015	0.0324466	0.274867	0.0459415	0.0420739	0.0348713	0.0751161	0.0356026	5.70687e-10	3.44252e-10	0.0348773	1	0.324777
rs1604525	1:217377592	T:0.274206	rs4919764	12:53272051	G:0.427855	17950	6667	5	1	0.0348773	3.03624e-05	-0.116165	0.0278525	2.28396e-06	0.120616	0.025519	0.250564	-0.0486493	0.0423413	6.07902e-07	0.164858	0.0330464	0.0348964	-0.0822627	0.0389952	1.99189e-09	1.17049e-09	0.0348773	1	0.324777
rs7821832	8:25889446	G:0.301455	rs10885409	10:114808072	T:0.457051	17870	6602	5	1	0.0350773	0.000375173	-0.0984578	0.0276803	5.34971e-08	-0.140151	0.0257666	9.21657e-05	-0.16654	0.0425898	2.85039e-08	-0.184021	0.0331546	0.0350429	0.0774125	0.0367256	4.35855e-10	2.65628e-10	0.0350773	1	0.325943
rs4132670	10:114767771	A:0.397858	rs11158715	14:68489386	T:0.306427	17877	6635	5	1	0.0351175	4.9168e-19	0.233969	0.026247	9.37253e-05	0.113605	0.0290826	1.83492e-16	0.279164	0.0339103	2.20889e-05	0.176051	0.0414954	0.0351102	-0.0732865	0.034781	3.62156e-21	3.14806e-21	0.0351175	1	0.325943
rs7821832	8:25889446	G:0.302242	rs2856608	16:19505751	G:0.334807	17979	6636	5	1	0.0352786	0.000177909	-0.103284	0.0275536	2.77226e-05	-0.112843	0.0269226	0.194343	-0.0489454	0.037713	0.0742633	-0.0636095	0.0356358	0.0353674	-0.0791369	0.0376103	1.13307e-07	6.1095e-08	0.0352786	1	0.326903
rs2894593	2:227190317	T:0.382843	rs12255372	10:114808902	T:0.284863	18121	6720	5	1	0.0357256	3.95689e-06	-0.119051	0.0258042	2.83727e-16	0.220397	0.0269433	1.2649e-06	-0.166686	0.0344024	6.23538e-05	0.159069	0.0397303	0.0356724	0.0807942	0.0384617	1.00107e-19	8.53247e-20	0.0357256	1	0.330505
rs7899529	10:114779538	G:0.452349	rs11158715	14:68489386	T:0.306216	17922	6654	5	1	0.0358485	1.6497e-07	-0.134713	0.025733	0.000134075	0.110687	0.0289843	5.77486e-08	-0.17616	0.0324681	0.268568	0.0465865	0.0421077	0.0358546	0.0747399	0.0356146	9.67932e-10	5.90953e-10	0.0358485	1	0.331102
rs4646698	3:125886441	C:0.478899	rs35748167	18:58037433	G:0.169198	18103	6714	5	1	0.036303	0.203422	0.111952	0.0880219	0.0437069	-0.169991	0.0842837	0.0199913	0.26543	0.114089	0.93763	-0.00888653	0.113567	0.0368629	-0.177227	0.0849082	1.24546e-08	7.26254e-09	0.036303	1	0.334755
rs10885406	10:114777724	A:0.452146	rs4148475	13:95853574	T:0.245342	18034	6683	5	1	0.0364281	3.24757e-07	-0.131033	0.0256502	4.33512e-06	-0.16302	0.0354804	0.00150428	-0.0966438	0.03045	0.0435939	-0.0962489	0.0476958	0.0365569	-0.0656566	0.0314044	2.56438e-11	1.70288e-11	0.0364281	1	0.335203
chr10:114772253:i	10:114772253	C:0.449097	rs4148475	13:95853574	T:0.245626	18005	6673	5	1	0.0364698	2.12849e-07	-0.133773	0.0257864	6.41633e-06	-0.16017	0.0354971	0.00120331	-0.0991595	0.0306228	0.0497797	-0.0935219	0.0476702	0.0365613	-0.0657908	0.0314694	2.58449e-11	1.71764e-11	0.0364698	1	0.335203
rs6997996	8:25891653	G:0.27811	rs6585199	10:114765171	G:0.456981	17876	6612	5	1	0.0366794	4.28195e-05	-0.114304	0.0279355	1.99115e-08	-0.144853	0.0258077	2.43496e-05	-0.184145	0.0436286	1.13452e-08	-0.186711	0.0327031	0.0366562	0.0784333	0.0375356	1.7556e-11	1.18057e-11	0.0366794	1	0.336584
rs117537110	6:30649931	G:0.446632	rs599136	10:112823415	A:0.0600044	18007	6674	5	1	0.0369326	5.28003e-07	0.615973	0.122805	1.12522e-05	-0.234818	0.0534698	2.77456e-07	0.631995	0.123	0.058763	-0.134916	0.0713854	0.0373454	-0.112863	0.0542096	2.06689e-10	1.33478e-10	0.0369326	1	0.338045
rs17866193	4:118392862	C:0.442206	rs12265291	10:114810240	T:0.450097	17995	6665	5	1	0.036975	4.54805e-06	0.116775	0.0254711	1.65965e-08	-0.145885	0.0258469	6.25959e-06	0.181621	0.0402046	0.0508034	-0.0798036	0.0408592	0.0370608	-0.0695626	0.0333618	2.90539e-12	2.02928e-12	0.036975	1	0.338045
rs1532716	1:217402689	A:0.275382	rs2972152	2:227066574	A:0.280136	17877	6639	5	1	0.0370174	2.89903e-05	-0.116552	0.0278749	5.81387e-07	-0.139218	0.0278587	0.0759896	-0.0656596	0.0370029	0.014621	-0.0894523	0.0366362	0.0372946	-0.0884067	0.0424517	4.80098e-10	3.05451e-10	0.0370174	1	0.338045
rs3761659	5:131657784	G:0.251881	rs12718338	10:114813047	C:0.457332	17941	6652	5	1	0.0374875	7.89096e-07	-0.177012	0.0358466	2.55805e-08	-0.14325	0.0257214	0.013273	-0.11522	0.046528	0.000322791	-0.109401	0.0304205	0.0376149	-0.0643306	0.0309427	6.1799e-13	4.47868e-13	0.0374875	1	0.341787
rs1000796	1:217402330	A:0.275391	rs2972152	2:227066574	A:0.280145	17880	6639	5	1	0.0376168	2.88304e-05	-0.116599	0.0278777	5.75667e-07	-0.139264	0.0278573	0.0750183	-0.0658768	0.0370021	0.0144095	-0.0896487	0.0366378	0.037901	-0.0881295	0.0424531	4.73116e-10	3.05159e-10	0.0376168	1	0.342259
rs1522812	2:226997454	A:0.361386	rs621010	11:102353911	G:0.13405	17859	6598	5	1	0.03766	3.56545e-05	0.110319	0.026686	0.0933554	-0.0627089	0.0373721	0.00396746	0.0847107	0.0294059	0.00837252	-0.134271	0.0509246	0.0375133	0.107887	0.0518653	5.12944e-05	2.40818e-05	0.03766	1	0.342259
rs117537110	6:30649931	G:0.442435	rs3739480	9:19516280	G:0.502898	17945	6660	5	1	0.0379203	1.06192e-06	0.601816	0.123328	5.38537e-06	-0.178698	0.0392812	9.65002e-06	0.556881	0.125852	7.43571e-07	-0.226672	0.0457957	0.0384271	0.0884538	0.0427258	1.55865e-10	1.03466e-10	0.0379203	1	0.344074
rs4132670	10:114767771	A:0.39733	rs10860059	12:97046476	G:0.258675	17868	6616	5	1	0.0380511	1.58621e-18	0.230826	0.0262798	3.89389e-05	-0.119179	0.0289714	1.00135e-08	0.189266	0.0330279	1.2523e-05	-0.1789	0.0409544	0.0380726	0.083285	0.0401553	2.29751e-21	2.14663e-21	0.0380511	1	0.344555
rs1562692	3:34534267	G:0.121739	rs6585202	10:114782803	T:0.462396	17977	6682	5	1	0.0380949	6.19968e-05	0.220136	0.0549642	6.76124e-08	-0.137164	0.025413	0.0588202	0.131579	0.0696359	7.58534e-09	-0.158824	0.0274905	0.0381926	0.0912336	0.0440151	1.67873e-10	1.11704e-10	0.0380949	1	0.344555
rs10787472	10:114781297	A:0.452241	rs4148475	13:95853574	T:0.246413	18049	6699	5	1	0.0381825	3.04681e-07	-0.131269	0.0256359	4.12404e-06	-0.163356	0.0354733	0.00142985	-0.0971154	0.0304575	0.0410745	-0.0973293	0.0476456	0.038284	-0.0649094	0.03133	2.2697e-11	1.5711e-11	0.0381825	1	0.344738
rs4148475	13:95853574	T:0.246281	rs62026181	16:19506239	T:0.336107	18085	6706	5	1	0.0382703	2.94001e-06	-0.165624	0.0354279	5.16323e-05	-0.108549	0.0268146	3.41979e-07	-0.204168	0.0400432	6.27746e-06	-0.144802	0.0320584	0.0383109	0.0668651	0.0322784	4.00805e-09	2.50606e-09	0.0382703	1	0.344738
rs4148475	13:95853574	T:0.246173	rs1475962	16:19503598	C:0.339054	18093	6706	5	1	0.0383583	2.82978e-06	-0.165908	0.0354291	3.1077e-05	-0.111708	0.0268179	3.3012e-07	-0.204443	0.0400446	3.94359e-06	-0.147987	0.0320711	0.0383736	0.0666166	0.0321688	2.40034e-09	1.52076e-09	0.0383583	1	0.344738
rs4148475	13:95853574	T:0.246173	rs1967952	16:19503828	T:0.339054	18093	6706	5	1	0.0383583	2.82978e-06	-0.165908	0.0354291	3.1077e-05	-0.111708	0.0268179	3.3012e-07	-0.204443	0.0400446	3.94359e-06	-0.147987	0.0320711	0.0383736	0.0666166	0.0321688	2.40034e-09	1.52076e-09	0.0383583	1	0.344738
rs7918599	10:114777396	C:0.449584	rs4148475	13:95853574	T:0.245455	18040	6690	5	1	0.0384907	1.72049e-07	-0.134531	0.0257365	4.08847e-06	-0.16348	0.0354864	0.00104213	-0.100277	0.0305825	0.0403733	-0.0976379	0.0476304	0.0385915	-0.0648751	0.0313631	1.28192e-11	9.02517e-12	0.0384907	1	0.345381
rs114863326	10:114783775	C:0.139171	rs35748167	18:58037433	G:0.168989	17942	6647	5	1	0.0389357	7.05354e-06	-0.161015	0.0358444	1.23055e-08	-0.256402	0.0450187	8.22785e-07	-0.194313	0.0394153	1.4833e-09	-0.285353	0.0471957	0.0386964	0.104671	0.0506292	2.6818e-12	1.95846e-12	0.0389357	1	0.34703
rs4148475	13:95853574	T:0.246187	rs1475964	16:19505406	T:0.339035	18094	6708	5	1	0.0389805	3.0103e-06	-0.165434	0.035424	3.01324e-05	-0.111895	0.0268174	3.55755e-07	-0.203845	0.0400385	3.89817e-06	-0.148064	0.032071	0.0389723	0.0664112	0.0321685	2.47895e-09	1.5906e-09	0.0389805	1	0.34703
rs4148475	13:95853574	T:0.246187	rs4421962	16:19505852	C:0.339035	18094	6708	5	1	0.0389805	3.0103e-06	-0.165434	0.035424	3.01324e-05	-0.111895	0.0268174	3.55755e-07	-0.203845	0.0400385	3.89817e-06	-0.148064	0.032071	0.0389723	0.0664112	0.0321685	2.47895e-09	1.5906e-09	0.0389805	1	0.34703
rs4148475	13:95853574	T:0.246187	rs2245423	16:19505730	T:0.339035	18094	6708	5	1	0.0389805	3.0103e-06	-0.165434	0.035424	3.01324e-05	-0.111895	0.0268174	3.55755e-07	-0.203845	0.0400385	3.89817e-06	-0.148064	0.032071	0.0389723	0.0664112	0.0321685	2.47895e-09	1.5906e-09	0.0389805	1	0.34703
rs4148475	13:95853574	T:0.246187	rs1475963	16:19505282	G:0.339035	18094	6708	5	1	0.0389805	3.0103e-06	-0.165434	0.035424	3.01324e-05	-0.111895	0.0268174	3.55755e-07	-0.203845	0.0400385	3.89817e-06	-0.148064	0.032071	0.0389723	0.0664112	0.0321685	2.47895e-09	1.5906e-09	0.0389805	1	0.34703
rs1562692	3:34534267	G:0.121786	rs6585200	10:114768609	A:0.454348	17929	6658	5	1	0.0391602	5.69822e-05	0.221664	0.0550721	4.18665e-09	-0.151926	0.0258525	0.0606676	0.131797	0.0702575	5.00436e-10	-0.173242	0.027857	0.0392542	0.0936854	0.045445	1.00227e-11	7.18976e-12	0.0391602	1	0.348083
rs10787472	10:114781297	A:0.454388	rs10885409	10:114808072	T:0.456759	17923	6658	5	1	0.0392503	0.903089	0.00892008	0.0732594	0.0393984	-0.150988	0.0732953	0.315608	0.0813301	0.0810445	0.300174	-0.0830516	0.0801609	0.0393015	-0.072432	0.0351438	1.9293e-07	1.12053e-07	0.0392503	1	0.348339
rs4148475	13:95853574	T:0.246212	rs1967951	16:19503773	T:0.338679	18082	6702	5	1	0.039386	2.7427e-06	-0.16618	0.0354388	4.38004e-05	-0.109638	0.0268296	3.2887e-07	-0.204503	0.0400506	5.56633e-06	-0.145771	0.0320924	0.0393981	0.0662953	0.0321821	3.23632e-09	2.08227e-09	0.039386	1	0.348997
rs11158715	14:68489386	T:0.305891	rs2856608	16:19505751	G:0.335568	17977	6672	5	1	0.0394767	0.000185653	0.108282	0.0289697	1.33777e-05	-0.11718	0.0269143	2.98466e-05	0.159954	0.0383157	0.0526136	-0.0690233	0.0356143	0.0395743	-0.0735468	0.0357342	7.19521e-08	4.30898e-08	0.0394767	1	0.349255
rs4148475	13:95853574	T:0.246214	rs2856609	16:19506773	G:0.33899	18092	6707	5	1	0.0396132	2.99984e-06	-0.165459	0.035424	3.18753e-05	-0.111556	0.0268187	3.61043e-07	-0.203734	0.0400387	4.18514e-06	-0.147602	0.0320736	0.0396779	0.0661748	0.0321692	2.60809e-09	1.6941e-09	0.0396132	1	0.349372
rs4148475	13:95853574	T:0.246214	rs2856610	16:19507031	T:0.33899	18092	6707	5	1	0.0396132	2.99984e-06	-0.165459	0.035424	3.18753e-05	-0.111556	0.0268187	3.61043e-07	-0.203734	0.0400387	4.18514e-06	-0.147602	0.0320736	0.0396779	0.0661748	0.0321692	2.60809e-09	1.6941e-09	0.0396132	1	0.349372
rs10787473	10:114781400	C:0.454479	rs10885409	10:114808072	T:0.456852	17915	6653	5	1	0.0399336	0.945215	0.00503982	0.0733412	0.044718	-0.147289	0.0733768	0.341046	0.0772406	0.0811265	0.321105	-0.079605	0.0802317	0.039994	-0.0721916	0.0351501	1.97892e-07	1.16504e-07	0.0399336	1	0.350553
rs4148475	13:95853574	T:0.246185	rs2856614	16:19512116	T:0.339065	18088	6704	5	1	0.0400257	3.4317e-06	-0.16454	0.0354373	4.75451e-05	-0.109107	0.0268249	4.14853e-07	-0.202793	0.0400617	6.10441e-06	-0.145107	0.0320839	0.0400454	0.0660758	0.0321806	4.3592e-09	2.82372e-09	0.0400257	1	0.350553
rs6585199	10:114765171	G:0.458682	rs10885409	10:114808072	T:0.45655	17825	6619	5	1	0.0400257	0.226668	-0.0808034	0.0668356	0.307386	-0.068209	0.0668242	0.857106	-0.0133752	0.0742822	0.950464	0.00468976	0.0754906	0.0400746	-0.0722991	0.0352167	1.00974e-07	6.06319e-08	0.0400257	1	0.350553
rs4148475	13:95853574	T:0.246185	rs1134662	16:19510249	G:0.339065	18088	6704	5	1	0.0400257	3.4317e-06	-0.16454	0.0354373	4.75451e-05	-0.109107	0.0268249	4.14853e-07	-0.202793	0.0400617	6.10441e-06	-0.145107	0.0320839	0.0400454	0.0660758	0.0321806	4.3592e-09	2.82372e-09	0.0400257	1	0.350553
rs6997996	8:25891653	G:0.277713	rs6573817	14:68617269	G:0.318258	17943	6634	5	1	0.0400718	5.53785e-05	-0.112381	0.0278745	0.000253661	0.112008	0.0306155	0.101707	-0.0611375	0.0373557	2.90485e-05	0.154375	0.0369248	0.0401868	-0.0761497	0.0371132	3.22467e-07	1.8786e-07	0.0400718	1	0.350553
rs599136	10:112823415	A:0.0600928	rs4132670	10:114767771	A:0.396557	17889	6630	5	1	0.0401179	1.50088e-05	-0.232233	0.0536513	9.4456e-19	0.232217	0.0262645	0.181231	-0.107564	0.080453	1.41397e-19	0.248776	0.0274854	0.0403158	-0.150759	0.073523	5.65233e-22	5.59728e-22	0.0401179	1	0.350553
rs10885406	10:114777724	A:0.454342	rs10885409	10:114808072	T:0.456856	17905	6642	5	1	0.0403031	0.951064	0.00449002	0.0731628	0.0459384	-0.146128	0.073212	0.343391	0.0767403	0.0809935	0.325752	-0.0786692	0.0800537	0.0403177	-0.072093	0.0351591	2.31811e-07	1.36926e-07	0.0403031	1	0.351629
rs1522812	2:226997454	A:0.362163	rs12718338	10:114813047	C:0.457584	17800	6575	5	1	0.0403961	6.60764e-05	0.106656	0.0267309	2.95524e-08	-0.143122	0.0258153	4.66507e-05	0.176818	0.0434249	0.0192421	-0.0875637	0.0374075	0.0404607	-0.0708853	0.0345948	7.19901e-11	5.11252e-11	0.0403961	1	0.351899
rs7821832	8:25889446	G:0.301498	rs11196208	10:114811316	T:0.457506	17826	6581	5	1	0.0406294	0.000344134	-0.0992396	0.0277237	3.15355e-08	-0.142832	0.0258161	0.000105355	-0.165633	0.0427118	2.3354e-08	-0.185538	0.0332201	0.0405955	0.0754073	0.0368265	2.35356e-10	1.64139e-10	0.0406294	1	0.352847
rs6436602	2:227005350	G:0.364487	rs11158715	14:68489386	T:0.306244	18002	6682	5	1	0.0406294	3.94537e-05	0.10899	0.0265139	0.000139003	0.110286	0.0289471	0.031306	0.070199	0.0326027	0.141504	0.0571621	0.0388801	0.0406055	0.0772452	0.0377259	1.7878e-07	1.07056e-07	0.0406294	1	0.352847
rs6585200	10:114768609	A:0.45357	rs35748167	18:58037433	G:0.169095	17984	6675	5	1	0.0410057	1.32236e-08	-0.146809	0.0258322	5.92626e-09	-0.261887	0.0450068	1.52301e-05	-0.122746	0.0283784	0.000975615	-0.189049	0.0573315	0.0412291	-0.0687048	0.0336587	1.90641e-15	1.62131e-15	0.0410057	1	0.355322
rs7708975	5:132650567	T:0.0960625	rs117537110	6:30649931	G:0.447399	18108	6713	5	1	0.0410529	0.000239118	-0.157537	0.042883	6.32906e-07	0.612532	0.122976	0.301837	-0.0644127	0.062385	3.85788e-07	0.624848	0.123102	0.0410882	-0.0876153	0.0428932	4.0911e-09	2.71015e-09	0.0410529	1	0.355322
rs3761659	5:131657784	G:0.251589	rs11196208	10:114811316	T:0.45673	17934	6649	5	1	0.0412427	6.58576e-07	-0.178318	0.0358559	2.84906e-08	-0.142842	0.0257351	0.0114588	-0.117672	0.0465402	0.000311062	-0.109684	0.0304179	0.0413541	-0.0632101	0.0309859	5.78849e-13	4.54807e-13	0.0412427	1	0.355322
rs6573817	14:68617269	G:0.318758	rs2856608	16:19505751	G:0.334787	17998	6675	5	1	0.0412427	0.000128099	0.116918	0.0305262	1.11463e-05	-0.118184	0.0268988	1.89835e-05	0.165567	0.0387153	0.0507445	-0.0698919	0.0357753	0.0412777	-0.0695115	0.0340621	4.46761e-08	2.8077e-08	0.0412427	1	0.355322
rs1604525	1:217377592	T:0.273637	rs2521793	16:19511391	C:0.340942	17896	6644	5	1	0.0412903	1.22122e-05	-0.122118	0.0279207	1.65681e-05	-0.116046	0.0269453	4.08211e-06	-0.173463	0.0376508	3.50069e-06	-0.159612	0.0344064	0.041164	0.0824059	0.040358	6.51843e-09	4.29339e-09	0.0412903	1	0.355322
rs57225583	10:114771843	G:0.140356	rs114863326	10:114783775	C:0.13896	17908	6636	5	1	0.0412903	0.559804	0.194327	0.333247	0.291053	-0.35328	0.334604	0.593365	0.178113	0.333566	0.127725	-0.525989	0.345333	0.0400561	0.145253	0.0707457	3.92137e-05	2.00513e-05	0.0412903	1	0.355322
rs74987670	10:112820864	G:0.0596982	rs4132670	10:114767771	A:0.39673	17890	6629	5	1	0.0414811	1.21919e-05	-0.23554	0.0538485	1.17953e-18	0.231567	0.0262648	0.167334	-0.111416	0.080688	1.79882e-19	0.247868	0.027465	0.041696	-0.15081	0.074052	5.61382e-22	5.71766e-22	0.0414811	1	0.356424
rs1532716	1:217402689	A:0.274403	rs4646591	15:58303002	G:0.473182	18010	6683	5	1	0.041673	3.83009e-05	-0.114468	0.0278003	7.81008e-07	0.191624	0.0387899	0.200431	-0.0526126	0.0410931	9.3633e-08	0.227858	0.0426808	0.0416662	-0.0596829	0.0293017	9.91854e-10	6.86008e-10	0.041673	1	0.35753
rs4148475	13:95853574	T:0.246187	rs2353696	16:19505813	T:0.33909	18094	6708	5	1	0.0418657	3.01626e-06	-0.16542	0.0354241	2.79617e-05	-0.112362	0.0268201	3.83569e-07	-0.20329	0.0400418	3.93578e-06	-0.148	0.0320711	0.0418968	0.0654628	0.0321757	2.30838e-09	1.57397e-09	0.0418657	1	0.358426
rs10195178	2:227199263	T:0.428206	rs6585199	10:114765171	G:0.456406	17961	6666	5	1	0.0419624	1.94476e-06	0.119538	0.0251179	1.46169e-08	-0.145774	0.0257278	4.92287e-06	0.182923	0.0400441	0.034772	-0.0839827	0.0397833	0.0420454	-0.0692417	0.0340577	1.12232e-12	8.85084e-13	0.0419624	1	0.358426
rs4148475	13:95853574	T:0.246214	rs2187659	16:19508573	A:0.338934	18092	6710	5	1	0.042108	2.82508e-06	-0.165894	0.0354237	3.79046e-05	-0.11049	0.0268187	3.62174e-07	-0.203708	0.0400383	5.23089e-06	-0.146103	0.032073	0.0421235	0.0653784	0.0321697	2.89819e-09	1.97571e-09	0.042108	1	0.358426
rs4148475	13:95853574	T:0.246214	rs2187660	16:19508583	C:0.338934	18092	6710	5	1	0.042108	2.82508e-06	-0.165894	0.0354237	3.79046e-05	-0.11049	0.0268187	3.62174e-07	-0.203708	0.0400383	5.23089e-06	-0.146103	0.032073	0.0421235	0.0653784	0.0321697	2.89819e-09	1.97571e-09	0.042108	1	0.358426
rs4148475	13:95853574	T:0.2462	rs2521791	16:19508824	C:0.338943	18093	6710	5	1	0.042108	2.83048e-06	-0.165881	0.0354239	3.8007e-05	-0.110476	0.0268192	3.62736e-07	-0.203698	0.0400385	5.24245e-06	-0.146091	0.0320738	0.042112	0.0653827	0.03217	2.90953e-09	1.98328e-09	0.042108	1	0.358426
rs1000796	1:217402330	A:0.274413	rs4646591	15:58303002	G:0.473158	18013	6683	5	1	0.0421566	3.82771e-05	-0.114484	0.0278033	7.83607e-07	0.191604	0.0387909	0.199124	-0.0527664	0.0410937	9.48879e-08	0.227759	0.0426815	0.042108	-0.0595521	0.0293006	9.89919e-10	6.91275e-10	0.0421566	1	0.358426
rs6585202	10:114782803	T:0.461652	rs35748167	18:58037433	G:0.169476	18032	6699	5	1	0.0423028	2.03623e-07	-0.131915	0.0253879	5.42695e-09	-0.261681	0.0448582	0.000102953	-0.108359	0.0279023	0.000884489	-0.189757	0.0570715	0.042497	-0.0679324	0.033487	2.55324e-14	2.14893e-14	0.0423028	1	0.359008
rs11196208	10:114811316	T:0.456756	rs1729752	13:95732362	G:0.297134	17933	6648	5	1	0.0423517	3.2036e-08	-0.142339	0.0257398	3.30291e-08	-0.172814	0.031281	0.000466082	-0.107871	0.0308244	0.00243533	-0.121689	0.0401448	0.042485	-0.061065	0.0301	3.56914e-14	2.99215e-14	0.0423517	1	0.359008
rs6585199	10:114765171	G:0.459231	rs11196208	10:114811316	T:0.456981	17783	6599	5	1	0.0424496	0.235859	-0.079249	0.0668542	0.281079	-0.0720553	0.066848	0.867001	-0.0124493	0.0743385	0.999493	4.79918e-05	0.0755287	0.0424632	-0.0715612	0.03527	6.46867e-08	4.12442e-08	0.0424496	1	0.35918
rs1562692	3:34534267	G:0.121485	rs4148423	13:95931595	C:0.479563	18031	6685	5	1	0.0424986	5.50233e-05	0.221707	0.0549704	2.51589e-07	0.237631	0.0460836	0.217932	0.10052	0.0815879	2.00399e-06	0.221941	0.0466948	0.0427966	0.108683	0.0536523	6.03944e-10	4.28965e-10	0.0424986	1	0.35918
rs1555944	14:68625118	G:0.321995	rs2856608	16:19505751	G:0.335138	17918	6659	5	1	0.0427447	0.000175399	0.114319	0.0304684	5.83166e-06	-0.122098	0.026939	2.61266e-05	0.162636	0.0386782	0.0406149	-0.0736509	0.0359722	0.042791	-0.0690704	0.0340963	3.2463e-08	2.11802e-08	0.0427447	1	0.360722
rs3821757	3:10948564	G:0.4846	rs4148475	13:95853574	T:0.24273	18020	6654	5	1	0.0428436	0.00146397	-0.108505	0.0341026	0.00100676	-0.124513	0.0378618	0.126985	-0.062546	0.0409842	0.37261	-0.0476925	0.0534912	0.0428401	-0.0712027	0.0351572	8.95458e-08	5.7051e-08	0.0428436	1	0.361019
rs10885406	10:114777724	A:0.452626	rs6573817	14:68617269	G:0.319445	17953	6659	5	1	0.043042	2.38417e-07	-0.13272	0.0256882	0.000145553	0.11597	0.0305301	9.49304e-08	-0.172072	0.0322464	0.203573	0.0546726	0.0430006	0.0430292	0.0705491	0.0348662	1.40421e-09	9.90236e-10	0.043042	1	0.362153
rs6573817	14:68617269	G:0.318448	rs2074172	16:19529042	A:0.339607	17959	6663	5	1	0.0432415	0.000129848	0.116933	0.0305566	1.42273e-05	-0.117038	0.0269652	2.06486e-05	0.165686	0.038914	0.0519111	-0.0694759	0.035741	0.0432767	-0.0686633	0.0339744	5.51137e-08	3.58254e-08	0.0432415	1	0.362755
rs1562692	3:34534267	G:0.121443	rs10885405	10:114777670	C:0.462136	17959	6663	5	1	0.0432415	5.68986e-05	0.221317	0.0549812	7.88218e-08	-0.136593	0.0254372	0.0534434	0.134689	0.0697392	9.90737e-09	-0.157681	0.0275074	0.0433116	0.0892302	0.0441582	1.8063e-10	1.3335e-10	0.0432415	1	0.362755
rs117537110	6:30649931	G:0.448963	rs4132670	10:114767771	A:0.397619	17977	6662	5	1	0.0433415	6.11954e-07	0.616098	0.123531	6.3029e-19	0.232715	0.0261873	1.60826e-07	0.653624	0.124744	6.43376e-16	0.277597	0.0343527	0.0433614	-0.0526502	0.0260617	2.12214e-23	2.3119e-23	0.0433415	1	0.363057
rs6585200	10:114768609	A:0.453658	rs4148475	13:95853574	T:0.24612	17975	6669	5	1	0.0435928	1.64592e-08	-0.145835	0.0258315	5.54372e-06	-0.161669	0.0355858	0.000249313	-0.112375	0.0306788	0.0433314	-0.0968274	0.0479225	0.0437147	-0.0634215	0.0314464	1.804e-12	1.45704e-12	0.0435928	1	0.363857
rs17866193	4:118392862	C:0.442496	rs10860059	12:97046476	G:0.259258	17903	6626	5	1	0.0436432	3.27614e-06	0.118793	0.0255321	1.94623e-05	-0.12352	0.0289207	1.03676e-06	0.160472	0.0328531	0.301329	-0.0485695	0.0469912	0.0437224	-0.0784605	0.0389046	1.78378e-09	1.26589e-09	0.0436432	1	0.363857
rs12718338	10:114813047	C:0.457358	rs1729752	13:95732362	G:0.297408	17940	6651	5	1	0.0436937	2.95065e-08	-0.14264	0.0257271	3.37925e-08	-0.172672	0.031278	0.000439943	-0.10835	0.0308259	0.002442	-0.121759	0.0401787	0.0438346	-0.0606372	0.0300829	3.26246e-14	2.81074e-14	0.0436937	1	0.363857
rs10787473	10:114781400	C:0.452812	rs6573817	14:68617269	G:0.319349	17960	6670	5	1	0.0436937	2.02586e-07	-0.133453	0.0256792	0.000124357	0.117106	0.0305172	8.50848e-08	-0.172721	0.0322482	0.193082	0.0559641	0.0429991	0.043638	0.0703347	0.0348614	1.03945e-09	7.46931e-10	0.0436937	1	0.363857
rs6585199	10:114765171	G:0.456462	rs4148475	13:95853574	T:0.246212	17950	6659	5	1	0.0438963	2.34366e-08	-0.143777	0.0257458	6.83434e-06	-0.160285	0.0356285	0.000301561	-0.11049	0.030573	0.0465014	-0.0954935	0.047967	0.0440052	-0.0633013	0.03143	3.18783e-12	2.56495e-12	0.0438963	1	0.364474
rs6997996	8:25891653	G:0.278308	rs6585200	10:114768609	A:0.454192	17901	6622	5	1	0.0438963	4.01657e-05	-0.114596	0.0279059	1.48294e-08	-0.14664	0.025892	2.8611e-05	-0.181118	0.0432857	1.1177e-08	-0.1868	0.0327041	0.0438449	0.0753741	0.0373959	1.26204e-11	9.91472e-12	0.0438963	1	0.364474
rs6997996	8:25891653	G:0.277983	rs4132670	10:114767771	A:0.396922	17904	6614	5	1	0.0441509	6.25805e-05	-0.11188	0.0279499	4.19315e-19	0.234671	0.0262738	0.240184	-0.0491036	0.0418072	1.40295e-16	0.276153	0.0334144	0.0441645	-0.0756407	0.037585	8.24017e-22	8.80982e-22	0.0441509	1	0.366052
rs3761659	5:131657784	G:0.251836	rs10885409	10:114808072	T:0.45628	17978	6670	5	1	0.0443044	5.55347e-07	-0.179204	0.035797	4.86408e-08	-0.140151	0.0256865	0.00999204	-0.11963	0.0464384	0.000402789	-0.107482	0.0303772	0.0444373	-0.0621349	0.0309138	8.34851e-13	6.92117e-13	0.0443044	1	0.366789
rs1604525	1:217377592	T:0.274408	rs74987670	10:112820864	G:0.0596491	17955	6661	5	1	0.0444071	2.32437e-05	-0.117897	0.0278637	1.26176e-05	-0.234259	0.0536475	3.37466e-06	-0.136595	0.0293967	4.40406e-06	-0.327597	0.0713511	0.04357	0.168275	0.0833784	6.09367e-09	4.26888e-09	0.0444071	1	0.366993
rs10787472	10:114781297	A:0.452722	rs6573817	14:68617269	G:0.319318	17968	6675	5	1	0.0444585	2.18936e-07	-0.133056	0.0256741	0.000122794	0.117184	0.0305128	9.29657e-08	-0.17215	0.032238	0.190342	0.0562984	0.04299	0.0444688	0.0700533	0.0348585	1.11517e-09	8.11706e-10	0.0444585	1	0.366993
rs10885405	10:114777670	C:0.461391	rs35748167	18:58037433	G:0.168758	18014	6680	5	1	0.0445616	2.33892e-07	-0.131382	0.0254115	5.18603e-09	-0.261961	0.0448479	0.000107609	-0.108114	0.0279166	0.000835035	-0.190729	0.0570889	0.0447667	-0.0673444	0.0335574	2.84001e-14	2.4922e-14	0.0445616	1	0.367201
rs6677242	1:217398785	A:0.276045	rs4646591	15:58303002	G:0.473968	17959	6664	5	1	0.0446132	3.02866e-05	-0.11592	0.02779	9.41322e-07	0.190315	0.038812	0.181226	-0.0549296	0.0410846	1.19969e-07	0.226139	0.0427198	0.0445794	-0.0588317	0.0292899	9.50138e-10	6.95916e-10	0.0446132	1	0.367201
rs10787472	10:114781297	A:0.454401	rs11196205	10:114807047	G:0.456885	17917	6656	5	1	0.0451851	0.946516	-0.00492204	0.0733727	0.0628219	-0.136514	0.0733768	0.416855	0.0659813	0.0812688	0.37591	-0.0709672	0.0801475	0.045183	-0.0704179	0.0351572	2.66813e-07	1.72473e-07	0.0451851	1	0.370831
rs10787472	10:114781297	A:0.454917	rs11196208	10:114811316	T:0.45721	17878	6637	5	1	0.0451851	0.810449	0.0175223	0.0730561	0.0269413	-0.161789	0.0731294	0.276529	0.0880304	0.0808991	0.231891	-0.095681	0.0800342	0.0451756	-0.0705056	0.0351997	1.09821e-07	7.27087e-08	0.0451851	1	0.370831
rs905293	1:217405444	T:0.27443	rs4646591	15:58303002	G:0.474013	17990	6672	5	1	0.0452899	2.80649e-05	-0.116537	0.0278222	8.08458e-07	0.191375	0.0387923	0.176813	-0.0555929	0.0411606	1.04836e-07	0.226989	0.0426821	0.0452656	-0.0587231	0.0293296	7.59738e-10	5.66065e-10	0.0452899	1	0.371154
rs1555944	14:68625118	G:0.321746	rs2074172	16:19529042	A:0.33998	17879	6647	5	1	0.0454476	0.000162834	0.115001	0.030499	7.41097e-06	-0.121027	0.0270057	2.6714e-05	0.163271	0.0388758	0.0409711	-0.0734508	0.035938	0.0454817	-0.068022	0.0340081	3.67137e-08	2.5117e-08	0.0454476	1	0.371804
rs6604661	1:217409199	T:0.274341	rs4646591	15:58303002	G:0.473768	17974	6668	5	1	0.0455003	3.29371e-05	-0.115571	0.0278341	6.79052e-07	0.192747	0.0388035	0.184398	-0.0546589	0.0411794	8.88744e-08	0.228346	0.0426965	0.0454829	-0.0587046	0.0293499	7.39968e-10	5.53752e-10	0.0455003	1	0.371804
rs7899529	10:114779538	G:0.452448	rs35748167	18:58037433	G:0.168386	18033	6687	5	1	0.0456058	4.13164e-07	-0.129935	0.0256646	5.54982e-09	-0.261399	0.0448386	0.000156884	-0.106563	0.0281918	0.00083504	-0.19061	0.0570533	0.0458213	-0.067096	0.0335978	5.26455e-14	4.66687e-14	0.0456058	1	0.372131
rs7899529	10:114779538	G:0.454769	rs10885409	10:114808072	T:0.456864	17897	6640	5	1	0.0457117	0.71803	0.0263349	0.072931	0.0224799	-0.166507	0.0729605	0.23354	0.0960964	0.0806659	0.210763	-0.100092	0.0799791	0.0457333	-0.0702579	0.0351668	2.21196e-07	1.45095e-07	0.0457117	1	0.372458
rs10787473	10:114781400	C:0.454492	rs11196205	10:114807047	G:0.456977	17909	6651	5	1	0.0459241	0.904007	-0.00885883	0.0734557	0.0707255	-0.132759	0.0734594	0.44726	0.061827	0.0813523	0.40031	-0.0674698	0.0802193	0.0459822	-0.0701706	0.0351634	2.71014e-07	1.77457e-07	0.0459241	1	0.373117
rs10787473	10:114781400	C:0.455008	rs11196208	10:114811316	T:0.457275	17870	6632	5	1	0.0459241	0.835089	0.0152178	0.0730998	0.0289881	-0.15977	0.0731667	0.290966	0.0854705	0.0809376	0.241125	-0.0938632	0.0800757	0.0459446	-0.0702673	0.0352058	1.07697e-07	7.2295e-08	0.0459241	1	0.373117
rs10885406	10:114777724	A:0.454355	rs11196205	10:114807047	G:0.456953	17899	6640	5	1	0.0461376	0.940478	-0.00547385	0.0733083	0.0640603	-0.13579	0.0733303	0.421712	0.0652713	0.0812382	0.377862	-0.0706206	0.0800831	0.0461591	-0.070132	0.0351727	2.86248e-07	1.8786e-07	0.0461376	1	0.374315
rs2713539	2:227137125	T:0.346905	rs599136	10:112823415	A:0.0600611	18015	6679	5	1	0.0463522	7.99825e-09	-0.148834	0.0258012	2.11921e-05	-0.227048	0.0533985	1.06768e-09	-0.166486	0.0272974	1.28922e-05	-0.337195	0.0773042	0.0458055	0.155931	0.0780756	3.948e-12	3.3111e-12	0.0463522	1	0.375319
rs2713538	2:227134516	G:0.453311	rs10860059	12:97046476	G:0.258765	17970	6656	5	1	0.046406	4.6463e-06	0.113724	0.0248297	3.09715e-05	-0.120196	0.0288503	1.50834e-06	0.153828	0.0319801	0.313984	-0.0469622	0.0466405	0.0464435	-0.077225	0.0387804	3.62805e-09	2.66651e-09	0.046406	1	0.375319
rs1875574	1:217403246	G:0.274446	rs4646591	15:58303002	G:0.473956	17989	6674	5	1	0.0464598	3.24736e-05	-0.115597	0.0278187	8.32764e-07	0.191139	0.0387901	0.181406	-0.0550007	0.0411547	1.10692e-07	0.22657	0.0426827	0.0464665	-0.0583895	0.0293248	8.98694e-10	6.81432e-10	0.0464598	1	0.375319
rs7899529	10:114779538	G:0.453018	rs6573817	14:68617269	G:0.319177	17943	6657	5	1	0.0465678	3.90168e-07	-0.130415	0.0257042	0.000129389	0.116876	0.0305348	1.58194e-07	-0.169146	0.0322628	0.189218	0.0564942	0.0430302	0.0465079	0.069425	0.0348737	2.03118e-09	1.51641e-09	0.0465678	1	0.375655
rs6585199	10:114765171	G:0.459162	rs12718338	10:114813047	C:0.457589	17790	6602	5	1	0.0468387	0.263513	-0.0747815	0.0668811	0.251683	-0.0766323	0.0668535	0.906986	-0.00870548	0.0745072	0.929397	-0.0066787	0.0753772	0.0468882	-0.0700683	0.0352579	6.23911e-08	4.31718e-08	0.0468387	1	0.377207
rs3761659	5:131657784	G:0.249668	rs12265291	10:114810240	T:0.449281	18090	6706	5	1	0.0468931	4.04143e-07	-0.181172	0.0357552	1.08919e-08	-0.14738	0.0257827	0.00790846	-0.122823	0.0462443	0.000154181	-0.115181	0.030437	0.0470644	-0.0613628	0.030902	1.35357e-13	1.21051e-13	0.0468931	1	0.377207
rs10885409	10:114808072	T:0.456305	rs1729752	13:95732362	G:0.297519	17977	6669	5	1	0.0471661	5.31575e-08	-0.139775	0.0256919	1.98468e-08	-0.175325	0.0312337	0.000565279	-0.106108	0.0307761	0.00172161	-0.12553	0.0400481	0.0473153	-0.0595811	0.0300389	3.67884e-14	3.37132e-14	0.0471661	1	0.378299
rs10885406	10:114777724	A:0.454848	rs11196208	10:114811316	T:0.457256	17862	6621	5	1	0.0472758	0.842577	0.0144695	0.0728582	0.0299504	-0.158343	0.0729439	0.295727	0.0844295	0.0807443	0.244442	-0.09294	0.0798484	0.0473083	-0.0698466	0.0352133	1.29022e-07	8.82709e-08	0.0472758	1	0.378299
rs117537110	6:30649931	G:0.446152	rs7483053	11:56340724	T:0.169269	18060	6695	5	1	0.0472758	7.6126e-07	0.60837	0.123026	3.39877e-05	-0.139523	0.0336608	1.59762e-06	0.591669	0.1233	1.36825e-05	-0.203954	0.046898	0.0472449	0.0664259	0.0334791	6.47938e-10	5.0181e-10	0.0472758	1	0.378299
rs3761659	5:131657784	G:0.250124	rs4148427	13:95925674	T:0.252057	18113	6717	5	1	0.0473307	0.000689022	-0.13671	0.0402809	0.0178117	-0.0938063	0.0395889	0.15455	-0.0730632	0.0513214	0.610301	-0.0265142	0.052025	0.0471942	-0.0796129	0.0401163	1.30671e-07	8.94535e-08	0.0473307	1	0.378299
rs6585202	10:114782803	T:0.461743	rs4148475	13:95853574	T:0.246491	18023	6693	5	1	0.0473857	2.60297e-07	-0.130759	0.0253895	4.31646e-06	-0.163044	0.0354788	0.00107992	-0.0985146	0.0301376	0.0371042	-0.0995659	0.0477622	0.0475368	-0.0619388	0.0312588	2.0686e-11	1.71599e-11	0.0473857	1	0.378299
rs2713539	2:227137125	T:0.346821	rs7708975	5:132650567	T:0.0961305	18116	6718	5	1	0.0474408	1.41954e-08	-0.145759	0.0257024	0.000276218	-0.155902	0.0428698	2.22508e-09	-0.168576	0.0281877	7.16304e-05	-0.239629	0.0603476	0.0471921	0.121671	0.0613084	1.0192e-10	8.21419e-11	0.0474408	1	0.378299
rs1604525	1:217377592	T:0.274024	rs2856608	16:19505751	G:0.334915	18024	6687	5	1	0.0474959	2.82515e-05	-0.116423	0.0278049	1.48652e-05	-0.116316	0.0268586	9.11981e-06	-0.165556	0.0373122	3.82752e-06	-0.158562	0.0343168	0.0473508	0.0798944	0.0402867	1.27999e-08	9.31488e-09	0.0474959	1	0.378299
rs1502364	1:217392174	G:0.274342	rs4646591	15:58303002	G:0.473354	18014	6681	5	1	0.0476064	2.28827e-05	-0.117756	0.0278071	8.12634e-07	0.191347	0.0387946	0.162153	-0.0574993	0.0411336	1.10559e-07	0.226582	0.0426832	0.0475777	-0.0580645	0.0293089	6.32928e-10	4.93246e-10	0.0476064	1	0.378467
rs7899529	10:114779538	G:0.452536	rs4148475	13:95853574	T:0.245534	18024	6681	5	1	0.0476617	5.36221e-07	-0.128665	0.025667	4.07723e-06	-0.163509	0.0354884	0.00162162	-0.096063	0.0304769	0.0357434	-0.100219	0.0477272	0.0477615	-0.0621587	0.0314015	3.92935e-11	3.23686e-11	0.0476617	1	0.378467
rs117537110	6:30649931	G:0.446663	rs74987670	10:112820864	G:0.0596124	18008	6673	5	1	0.0477171	5.16517e-07	0.616432	0.122793	8.89603e-06	-0.238433	0.053672	2.80977e-07	0.631663	0.122993	0.045238	-0.143399	0.0716125	0.0481076	-0.107531	0.0544072	1.61442e-10	1.29574e-10	0.0477171	1	0.378467
rs7821832	8:25889446	G:0.302335	rs62026181	16:19506239	T:0.335474	17985	6643	5	1	0.0478281	0.000210279	-0.102038	0.0275308	5.18475e-05	-0.108963	0.0269234	0.179719	-0.0506958	0.037787	0.0776377	-0.0628088	0.0355946	0.0478977	-0.0743665	0.0375916	2.43887e-07	1.65572e-07	0.0478281	1	0.378729
rs117537110	6:30649931	G:0.446409	rs11228658	11:56335596	T:0.169212	18072	6700	5	1	0.0478837	7.56389e-07	0.608511	0.123024	3.55299e-05	-0.139135	0.0336498	1.58427e-06	0.591864	0.123297	1.44316e-05	-0.203382	0.0468925	0.0479111	0.0662066	0.0334688	6.72434e-10	5.25883e-10	0.0478837	1	0.378729
rs6585199	10:114765171	G:0.458693	rs11196205	10:114807047	G:0.456701	17818	6617	5	1	0.0481628	0.171815	-0.0915588	0.0670076	0.395893	-0.0568563	0.0669701	0.724663	-0.0262549	0.0745383	0.864201	0.0129196	0.0755409	0.0481994	-0.0695905	0.0352249	1.11442e-07	7.77127e-08	0.0481628	1	0.380253
rs57225583	10:114771843	G:0.141489	rs35748167	18:58037433	G:0.169205	18058	6696	5	1	0.0482188	1.49037e-05	-0.153456	0.0354393	4.19982e-09	-0.263299	0.0448082	2.06486e-06	-0.185112	0.0389959	5.93214e-10	-0.290826	0.0469663	0.0480244	0.0984971	0.0498177	1.90726e-12	1.67311e-12	0.0482188	1	0.380253
rs7821832	8:25889446	G:0.302536	rs12265291	10:114810240	T:0.450064	17983	6638	5	1	0.0484436	0.00037626	-0.0979902	0.0275548	1.27391e-08	-0.147128	0.0258594	0.000131387	-0.16006	0.0418584	1.38258e-08	-0.187735	0.033078	0.0484144	0.0719784	0.0364686	1.06291e-10	8.70837e-11	0.0484436	1	0.380253
rs2713539	2:227137125	T:0.346942	rs74987670	10:112820864	G:0.0596692	18016	6678	5	1	0.0484436	9.51252e-09	-0.14805	0.0257964	1.76297e-05	-0.230098	0.0535987	1.31713e-09	-0.165485	0.0272839	1.2234e-05	-0.340078	0.077761	0.047871	0.15491	0.0782963	3.74886e-12	3.26377e-12	0.0484436	1	0.380253
rs10885406	10:114777724	A:0.452743	rs8011527	14:68638685	A:0.320705	17976	6659	5	1	0.0484999	1.83074e-07	-0.133946	0.0256811	0.000203559	0.113452	0.0305424	9.09187e-08	-0.172368	0.0322545	0.210159	0.0538284	0.0429553	0.0484696	0.0685933	0.034762	1.50063e-09	1.16603e-09	0.0484999	1	0.380253
rs1522812	2:226997454	A:0.359973	rs11158715	14:68489386	T:0.306134	17868	6610	5	1	0.0485564	4.45353e-05	0.109036	0.0267075	0.000115014	0.112093	0.029066	0.0299305	0.0713349	0.032858	0.115146	0.0612257	0.0388616	0.04852	0.0751068	0.0380714	1.66154e-07	1.15402e-07	0.0485564	1	0.380253
rs10787472	10:114781297	A:0.45485	rs12718338	10:114813047	C:0.457814	17885	6640	5	1	0.0485564	0.752276	0.0230734	0.0731004	0.0220899	-0.167428	0.0731506	0.250167	0.0932737	0.0811115	0.196776	-0.103124	0.0798922	0.0486064	-0.0694035	0.035194	9.59748e-08	6.76394e-08	0.0485564	1	0.380253
rs117537110	6:30649931	G:0.44647	rs12288760	11:56333753	C:0.169193	18074	6701	5	1	0.0486129	7.58535e-07	0.608445	0.123024	3.46184e-05	-0.139333	0.0336492	1.58531e-06	0.591849	0.123297	1.44238e-05	-0.203387	0.0468924	0.0485922	0.0660042	0.0334681	6.57499e-10	5.20878e-10	0.0486129	1	0.380253
rs7899529	10:114779538	G:0.455279	rs11196208	10:114811316	T:0.457379	17855	6620	5	1	0.0487828	0.698725	0.0282668	0.0730327	0.0193107	-0.170969	0.0730799	0.228349	0.09737	0.0808303	0.18723	-0.105594	0.0800673	0.0488452	-0.0693844	0.0352216	1.29654e-07	9.09973e-08	0.0487828	1	0.381057
rs10885406	10:114777724	A:0.452302	rs1555944	14:68625118	G:0.322749	17873	6643	5	1	0.0488964	3.98955e-07	-0.130425	0.0257277	0.000186361	0.113857	0.0304689	1.80161e-07	-0.169203	0.0324222	0.207238	0.0541811	0.0429601	0.0488781	0.0686568	0.0348573	2.88407e-09	2.2241e-09	0.0488964	1	0.381419
rs10787473	10:114781400	C:0.452928	rs8011527	14:68638685	A:0.320608	17983	6670	5	1	0.0490674	1.5533e-07	-0.134679	0.0256721	0.000174788	0.114575	0.0305295	8.13309e-08	-0.173028	0.0322563	0.199663	0.0550885	0.0429536	0.0490721	0.0684009	0.0347572	1.11626e-09	8.81249e-10	0.0490674	1	0.382227
rs1875574	1:217403246	G:0.274041	rs2521793	16:19511391	C:0.340857	17855	6621	5	1	0.049239	1.54643e-05	-0.12082	0.0279548	1.28414e-05	-0.117781	0.0269966	6.08957e-06	-0.170105	0.0376067	3.54445e-06	-0.159895	0.0344866	0.0490845	0.0794267	0.040362	6.38611e-09	4.86506e-09	0.049239	1	0.383037
rs10787473	10:114781400	C:0.454942	rs12718338	10:114813047	C:0.457879	17877	6635	5	1	0.0494112	0.776507	0.0207636	0.0731437	0.0238227	-0.165402	0.0731876	0.263685	0.0907032	0.08115	0.205032	-0.101303	0.079933	0.0494388	-0.0691606	0.0352	9.43025e-08	6.74467e-08	0.0494112	1	0.383694
rs11158715	14:68489386	T:0.305597	rs2074172	16:19529042	A:0.340442	17937	6659	5	1	0.0494688	0.000170682	0.108986	0.0289945	1.6353e-05	-0.116275	0.0269804	3.73176e-05	0.158879	0.0385303	0.0470984	-0.0706191	0.0355689	0.0495325	-0.0698696	0.0355756	7.87158e-08	5.66185e-08	0.0494688	1	0.383694
rs10787473	10:114781400	C:0.452489	rs1555944	14:68625118	G:0.322651	17880	6654	5	1	0.0495264	3.39398e-07	-0.131168	0.0257186	0.000159846	0.114979	0.0304561	1.61513e-07	-0.169867	0.0324241	0.196808	0.0554469	0.0429588	0.0495091	0.0684573	0.0348528	2.14535e-09	1.68281e-09	0.0495264	1	0.383694
rs10787472	10:114781297	A:0.452838	rs8011527	14:68638685	A:0.320577	17991	6675	5	1	0.0499899	1.68065e-07	-0.134279	0.025667	0.000172688	0.11465	0.030525	8.88662e-08	-0.172456	0.0322461	0.196907	0.0554162	0.0429445	0.0499741	0.0681248	0.0347543	1.19757e-09	9.58576e-10	0.0499899	1	0.386757
rs10885405	10:114777670	C:0.461483	rs4148475	13:95853574	T:0.245959	18005	6674	5	1	0.0502234	3.00844e-07	-0.13019	0.0254132	4.03429e-06	-0.163563	0.0354831	0.00110836	-0.0983508	0.0301554	0.0348454	-0.100824	0.0477804	0.0503387	-0.0612667	0.0313052	2.24984e-11	1.955e-11	0.0502234	1	0.387958
rs7972359	12:106264199	G:0.338291	rs200349	14:99378300	T:0.29162	18020	6677	5	1	0.050282	4.13204e-05	0.106416	0.0259552	5.92622e-06	-0.12439	0.0274653	0.0800124	0.0609771	0.0348318	4.96844e-06	-0.178868	0.0391729	0.0503115	0.078051	0.0398768	7.45155e-09	5.75456e-09	0.050282	1	0.387958
rs10787472	10:114781297	A:0.452398	rs1555944	14:68625118	G:0.322619	17888	6659	5	1	0.0504581	3.66365e-07	-0.13077	0.0257135	0.000157854	0.115058	0.0304517	1.76243e-07	-0.16929	0.0324138	0.193988	0.055786	0.0429496	0.0504489	0.0681712	0.0348499	2.29714e-09	1.82689e-09	0.0504581	1	0.388713
rs1502364	1:217392174	G:0.273937	rs2521793	16:19511391	C:0.341219	17880	6628	5	1	0.0505169	1.08092e-05	-0.122957	0.0279427	1.47801e-05	-0.116897	0.0269848	4.79574e-06	-0.17199	0.0376055	4.09577e-06	-0.158692	0.0344498	0.0503601	0.078964	0.0403517	5.19694e-09	4.06221e-09	0.0505169	1	0.388713
rs1532716	1:217402689	A:0.273999	rs2521793	16:19511391	C:0.34124	17876	6630	5	1	0.050753	1.84185e-05	-0.119655	0.0279355	1.57557e-05	-0.116479	0.0269763	7.30013e-06	-0.16865	0.0376052	4.36494e-06	-0.158277	0.034459	0.0506217	0.0788453	0.0403368	9.19245e-09	7.11853e-09	0.050753	1	0.389854
rs2713539	2:227137125	T:0.346866	rs849142	7:28185891	C:0.413221	18092	6708	5	1	0.0508715	2.14749e-08	-0.144068	0.0257279	8.57219e-06	-0.115305	0.0259091	0.0278545	-0.0862226	0.0392041	0.0597009	-0.0672495	0.0357141	0.0510814	-0.0701374	0.0359532	5.45988e-12	4.91697e-12	0.0508715	1	0.389854
rs10885406	10:114777724	A:0.454782	rs12718338	10:114813047	C:0.45786	17869	6624	5	1	0.0508715	0.78454	0.019932	0.0729021	0.0246948	-0.163889	0.0729647	0.26861	0.0895597	0.0809564	0.208304	-0.10029	0.0797064	0.050914	-0.0687324	0.0352076	1.13418e-07	8.26667e-08	0.0508715	1	0.389854
rs11196191	10:114780633	A:0.449394	rs1729752	13:95732362	G:0.298129	18061	6704	5	1	0.0510497	7.84218e-08	-0.138213	0.0257345	6.17294e-08	-0.168239	0.0310764	0.000589022	-0.105511	0.0307019	0.00232541	-0.120457	0.0395566	0.051228	-0.0583065	0.0299074	1.63591e-13	1.56482e-13	0.0510497	1	0.390166
rs2308953	5:34909062	C:0.0843675	rs4646362	17:17468641	C:0.497635	17969	6667	5	1	0.0510497	2.46925e-09	0.746457	0.125171	1.28735e-06	-0.176906	0.0365381	5.16154e-10	0.804699	0.129495	7.63107e-05	-0.152561	0.0385675	0.0515533	-0.106818	0.0548672	1.71777e-13	1.64188e-13	0.0510497	1	0.390166
rs11158715	14:68489386	T:0.306192	rs2521793	16:19511391	C:0.341664	17845	6626	5	1	0.0512287	0.000183438	0.108812	0.0290879	1.50839e-05	-0.11683	0.0269974	4.16819e-05	0.158673	0.03872	0.0454675	-0.0713168	0.035653	0.0513177	-0.06964	0.0357346	7.84855e-08	5.80915e-08	0.0512287	1	0.390344
rs6585199	10:114765171	G:0.456216	rs11158715	14:68489386	T:0.306516	17849	6632	5	1	0.0512885	7.81164e-09	-0.14903	0.0258173	8.52953e-05	0.114195	0.0290646	8.3625e-09	-0.187664	0.032575	0.200977	0.0541505	0.0423457	0.051234	0.069572	0.0356868	3.31532e-11	2.91019e-11	0.0512885	1	0.390344
rs2894593	2:227190317	T:0.382774	rs114863326	10:114783775	C:0.139155	17944	6648	5	1	0.0513483	4.63722e-06	-0.118623	0.025897	5.86953e-06	-0.162303	0.0358204	0.00170295	-0.0919014	0.0292897	0.0938266	-0.0876622	0.0523185	0.0518278	-0.100014	0.0514326	1.10649e-09	9.06884e-10	0.0513483	1	0.390344
rs7899529	10:114779538	G:0.454779	rs11196205	10:114807047	G:0.456987	17890	6638	5	1	0.0513483	0.809893	0.0175855	0.073101	0.0313258	-0.157394	0.0731074	0.287426	0.086097	0.0809345	0.244823	-0.0930739	0.0800281	0.0514146	-0.0685304	0.0351798	2.78799e-07	1.99819e-07	0.0513483	1	0.390344
rs7821832	8:25889446	G:0.302563	rs2856614	16:19512116	T:0.33842	17988	6641	5	1	0.0517695	0.000268811	-0.100296	0.0275262	5.18412e-05	-0.108996	0.0269315	0.189558	-0.0496546	0.0378497	0.0730482	-0.0637505	0.0355645	0.0518823	-0.0727273	0.037409	3.08603e-07	2.22024e-07	0.0517695	1	0.392493
rs7821832	8:25889446	G:0.302563	rs1134662	16:19510249	G:0.33842	17988	6641	5	1	0.0517695	0.000268811	-0.100296	0.0275262	5.18412e-05	-0.108996	0.0269315	0.189558	-0.0496546	0.0378497	0.0730482	-0.0637505	0.0355645	0.0518823	-0.0727273	0.037409	3.08603e-07	2.22024e-07	0.0517695	1	0.392493
rs1604525	1:217377592	T:0.274408	rs599136	10:112823415	A:0.0600111	17955	6662	5	1	0.0520118	2.15512e-05	-0.118418	0.0278749	1.68897e-05	-0.229987	0.0534546	3.4464e-06	-0.136583	0.0294218	6.76331e-06	-0.319842	0.0710601	0.0511156	0.162189	0.0831524	7.45883e-09	5.92163e-09	0.0520118	1	0.393803
rs7899529	10:114779538	G:0.453134	rs8011527	14:68638685	A:0.320439	17966	6657	5	1	0.0523163	3.0148e-07	-0.131634	0.0256972	0.000181617	0.114347	0.0305471	1.51788e-07	-0.169435	0.032271	0.19554	0.0556378	0.0429847	0.0523052	0.0674738	0.0347693	2.19409e-09	1.79918e-09	0.0523163	1	0.394529
rs7899529	10:114779538	G:0.455215	rs12718338	10:114813047	C:0.457986	17863	6624	5	1	0.0523163	0.64419	0.0337505	0.0730769	0.015717	-0.17657	0.0731011	0.205551	0.102591	0.081042	0.157624	-0.112942	0.0799243	0.0523225	-0.0683349	0.0352156	1.11442e-07	8.31395e-08	0.0523163	1	0.394529
rs905293	1:217405444	T:0.274026	rs2521793	16:19511391	C:0.34081	17856	6619	5	1	0.0523163	1.33018e-05	-0.121763	0.0279589	1.24358e-05	-0.117981	0.0269992	5.88323e-06	-0.17039	0.0376092	3.73232e-06	-0.159531	0.0344875	0.0521921	0.0783811	0.0403704	5.35668e-09	4.3057e-09	0.0523163	1	0.394529
rs1000796	1:217402330	A:0.274009	rs2521793	16:19511391	C:0.341294	17879	6630	5	1	0.0524387	1.83739e-05	-0.119682	0.0279384	1.54941e-05	-0.11658	0.0269765	7.62081e-06	-0.168346	0.0376143	4.49019e-06	-0.158082	0.0344608	0.0523116	0.0782844	0.0403411	8.99707e-09	7.15939e-09	0.0524387	1	0.394926
rs6585199	10:114765171	G:0.456596	rs12265291	10:114810240	T:0.449515	17936	6655	5	1	0.0526843	0.427984	-0.0563384	0.0710764	0.171963	-0.0975387	0.0714086	0.99937	6.05168e-05	0.0766177	0.79489	-0.0211525	0.0813664	0.0527477	-0.0684957	0.0353621	3.23365e-08	2.50453e-08	0.0526843	1	0.395701
rs10195178	2:227199263	T:0.428139	rs6585200	10:114768609	A:0.453603	17986	6676	5	1	0.0527458	1.76509e-06	0.119935	0.0250983	9.50042e-09	-0.148149	0.0258125	6.38501e-06	0.179897	0.03986	0.0255021	-0.0891239	0.0398995	0.0527458	-0.0658879	0.0340155	7.08529e-13	6.80251e-13	0.0527458	1	0.395701
rs7899529	10:114779538	G:0.452696	rs1555944	14:68625118	G:0.322482	17863	6641	5	1	0.0528693	6.4813e-07	-0.128109	0.0257438	0.000166144	0.114751	0.0304735	2.9771e-07	-0.166246	0.0324389	0.192612	0.056011	0.0429898	0.0528183	0.0675126	0.034865	4.14741e-09	3.38204e-09	0.0528693	1	0.395701
rs6585202	10:114782803	T:0.463767	rs10885409	10:114808072	T:0.457314	17898	6652	5	1	0.0532413	0.914684	-0.00693194	0.0647041	0.0377425	-0.135806	0.0653656	0.482046	0.0498633	0.0709278	0.414686	-0.0616916	0.0756325	0.0532597	-0.0675011	0.0349238	2.11892e-07	1.57594e-07	0.0532413	1	0.395701
rs6585199	10:114765171	G:0.456373	rs35748167	18:58037433	G:0.169191	17959	6665	5	1	0.0534284	1.89939e-08	-0.144726	0.0257477	4.40932e-09	-0.264747	0.0451166	1.60145e-05	-0.122045	0.0282888	0.00064322	-0.195931	0.0574122	0.0536848	-0.064922	0.0336493	2.03731e-15	2.15625e-15	0.0534284	1	0.395701
rs12258200	10:114781698	T:0.449499	rs1729752	13:95732362	G:0.298162	18059	6703	5	1	0.0534909	7.89092e-08	-0.138191	0.0257358	6.10613e-08	-0.168252	0.0310676	0.000568748	-0.105814	0.0307056	0.00221871	-0.120976	0.039544	0.05365	-0.0577057	0.0299047	1.63751e-13	1.62774e-13	0.0534909	1	0.395701
rs6677242	1:217398785	A:0.275637	rs2521793	16:19511391	C:0.340991	17826	6611	5	1	0.0534909	1.42125e-05	-0.121212	0.0279256	1.13123e-05	-0.118637	0.0270217	6.42046e-06	-0.169641	0.0375974	3.60039e-06	-0.160213	0.0345792	0.0533589	0.0779954	0.0403702	5.28394e-09	4.3263e-09	0.0534909	1	0.395701
rs7821832	8:25889446	G:0.302302	rs1967951	16:19503773	T:0.338032	17982	6639	5	1	0.0536162	0.000184108	-0.103021	0.0275467	4.78312e-05	-0.109524	0.0269367	0.163472	-0.0527646	0.0378651	0.0692607	-0.0646198	0.0355696	0.0536939	-0.0722428	0.0374451	1.9886e-07	1.49005e-07	0.0536162	1	0.395701
rs1604525	1:217377592	T:0.27498	rs2972152	2:227066574	A:0.280429	17894	6649	5	1	0.0536162	1.56645e-05	-0.120378	0.0278709	1.52114e-06	-0.133659	0.0277967	0.0477315	-0.0732647	0.037007	0.0160688	-0.0878726	0.0365018	0.0539077	-0.0816654	0.0423669	7.01272e-10	6.01212e-10	0.0536162	1	0.395701
rs7972359	12:106264199	G:0.338379	rs200352	14:99377084	G:0.292304	18101	6710	5	1	0.0538046	4.33353e-05	0.105932	0.0259069	7.80665e-06	-0.122289	0.0273552	0.0787783	0.06116	0.0347931	6.65019e-06	-0.175794	0.0390255	0.0537439	0.0767004	0.0397639	1.01355e-08	8.21326e-09	0.0538046	1	0.395701
rs2308953	5:34909062	C:0.0848634	rs4149477	22:26931305	C:0.481247	17864	6635	5	1	0.0539307	2.22126e-09	0.749133	0.125258	2.97093e-08	0.262513	0.0473582	0.119929	0.368848	0.23719	5.61502e-08	0.25748	0.0474125	0.0562277	0.26434	0.138451	3.52359e-15	3.72997e-15	0.0539307	1	0.395701
rs6585201	10:114768783	G:0.466589	rs4148475	13:95853574	T:0.246498	17988	6667	5	1	0.0539307	2.50695e-08	-0.141922	0.0254669	8.06618e-06	-0.158759	0.0355689	0.000258632	-0.11046	0.0302335	0.0447764	-0.0964218	0.0480487	0.0540262	-0.0602865	0.0312912	3.97896e-12	3.78004e-12	0.0539307	1	0.395701
rs7708975	5:132650567	T:0.096172	rs6585201	10:114768783	G:0.466526	17999	6674	5	1	0.0541203	0.000254926	-0.15712	0.0429611	1.62608e-08	-0.14368	0.0254405	0.000107742	-0.248668	0.0642145	2.54985e-09	-0.16281	0.0273252	0.0538825	0.111913	0.0580528	1.16737e-10	1.04562e-10	0.0541203	1	0.395701
rs1562692	3:34534267	G:0.120783	rs4919764	12:53272051	G:0.428043	17962	6668	5	1	0.0541837	0.000143352	0.209265	0.0550363	3.20125e-06	0.118947	0.025539	0.0334521	0.14003	0.0658462	0.000394584	0.0982206	0.0277171	0.0543871	0.082043	0.0426477	1.20361e-08	9.76968e-09	0.0541837	1	0.395701
rs4148475	13:95853574	T:0.245877	rs2521793	16:19511391	C:0.341525	17946	6652	5	1	0.0542471	3.82382e-06	-0.16444	0.0355874	3.15703e-05	-0.111954	0.0269002	6.32826e-07	-0.200811	0.0403161	5.84961e-06	-0.14582	0.0321774	0.0542215	0.0621565	0.032288	3.23948e-09	2.71274e-09	0.0542471	1	0.395701
rs6585199	10:114765171	G:0.456993	rs6573817	14:68617269	G:0.31924	17869	6635	5	1	0.0543107	1.70176e-08	-0.145419	0.0257841	7.78453e-05	0.121047	0.0306376	1.57029e-08	-0.182996	0.0323675	0.150465	0.0622146	0.043268	0.0542552	0.0671833	0.0349042	6.23023e-11	5.66442e-11	0.0543107	1	0.395701
rs6604661	1:217409199	T:0.273907	rs2521793	16:19511391	C:0.340891	17840	6615	5	1	0.0545656	1.46742e-05	-0.121233	0.0279756	1.00697e-05	-0.119302	0.0270179	6.71322e-06	-0.169427	0.0376287	3.31165e-06	-0.160485	0.0345094	0.0544345	0.0776744	0.0403847	4.76898e-09	3.97781e-09	0.0545656	1	0.395701
rs10885405	10:114777670	C:0.463559	rs10885409	10:114808072	T:0.457434	17878	6633	5	1	0.0549503	0.888345	-0.00911195	0.0649007	0.0428387	-0.13276	0.0655513	0.50233	0.0477593	0.0711945	0.431689	-0.0595168	0.0756918	0.0549638	-0.067075	0.0349501	2.68381e-07	2.03456e-07	0.0549503	1	0.395701
rs1502364	1:217392174	G:0.274787	rs74987670	10:112820864	G:0.0594661	17943	6649	5	1	0.0550792	2.23723e-05	-0.118168	0.0278711	2.81525e-05	-0.225209	0.053776	3.74195e-06	-0.135958	0.0293948	1.0906e-05	-0.314475	0.0714978	0.054168	0.160808	0.0835154	1.29129e-08	1.06044e-08	0.0550792	1	0.395701
rs4148427	13:95925674	T:0.252098	rs200352	14:99377084	G:0.292426	18114	6717	5	1	0.0552731	8.93238e-06	-0.155692	0.0350536	8.205e-06	-0.121934	0.027341	0.00248153	-0.120019	0.0396682	0.00553808	-0.0892584	0.0321774	0.0554988	-0.0637311	0.0332808	2.01341e-09	1.73008e-09	0.0552731	1	0.395701
rs7821832	8:25889446	G:0.302507	rs2521791	16:19508824	C:0.338298	17993	6647	5	1	0.0553379	0.000226712	-0.101485	0.0275234	4.14568e-05	-0.110374	0.0269257	0.172414	-0.051626	0.0378355	0.0641787	-0.0658104	0.0355552	0.0554331	-0.0716412	0.0374014	2.11479e-07	1.62302e-07	0.0553379	1	0.395701
rs7821832	8:25889446	G:0.302496	rs2187659	16:19508573	A:0.338289	17992	6647	5	1	0.0553379	0.000227051	-0.101472	0.0275228	4.13435e-05	-0.110389	0.0269253	0.1725	-0.0516148	0.0378348	0.0641098	-0.0658265	0.0355547	0.0554366	-0.0716382	0.0374005	2.11272e-07	1.62148e-07	0.0553379	1	0.395701
rs7821832	8:25889446	G:0.302496	rs2187660	16:19508583	C:0.338289	17992	6647	5	1	0.0553379	0.000227051	-0.101472	0.0275228	4.13435e-05	-0.110389	0.0269253	0.1725	-0.0516148	0.0378348	0.0641098	-0.0658265	0.0355547	0.0554366	-0.0716382	0.0374005	2.11272e-07	1.62148e-07	0.0553379	1	0.395701
rs6997996	8:25891653	G:0.277725	rs1555944	14:68625118	G:0.321559	17863	6618	5	1	0.0554028	6.8882e-05	-0.111075	0.0279074	0.000322867	0.109881	0.0305545	0.0944569	-0.0627913	0.037547	5.06476e-05	0.149311	0.0368432	0.0555245	-0.0710552	0.0371094	4.92664e-07	3.69553e-07	0.0554028	1	0.395701
rs905293	1:217405444	T:0.274861	rs74987670	10:112820864	G:0.0594587	17920	6640	5	1	0.0555328	2.84213e-05	-0.116714	0.0278836	2.83602e-05	-0.225094	0.0537698	4.80764e-06	-0.134499	0.0294114	1.11115e-05	-0.314242	0.0715107	0.0546266	0.160487	0.0835072	1.63873e-08	1.34706e-08	0.0555328	1	0.395701
rs1604525	1:217377592	T:0.273811	rs1967952	16:19503828	T:0.33848	18038	6694	5	1	0.0555979	2.27327e-05	-0.117778	0.0278026	1.79145e-05	-0.115233	0.0268646	9.58872e-06	-0.165405	0.0373691	5.41826e-06	-0.155937	0.0342876	0.0554528	0.0768613	0.0401299	1.24668e-08	1.03251e-08	0.0555979	1	0.395701
rs1604525	1:217377592	T:0.273811	rs1475962	16:19503598	C:0.33848	18038	6694	5	1	0.0555979	2.27327e-05	-0.117778	0.0278026	1.79145e-05	-0.115233	0.0268646	9.58872e-06	-0.165405	0.0373691	5.41826e-06	-0.155937	0.0342876	0.0554528	0.0768613	0.0401299	1.24668e-08	1.03251e-08	0.0555979	1	0.395701
rs7708975	5:132650567	T:0.0961806	rs6585199	10:114765171	G:0.456406	17961	6666	5	1	0.0559248	0.000183327	-0.160971	0.0430294	1.51799e-08	-0.145567	0.0257207	7.85811e-05	-0.2483	0.0628817	2.41694e-09	-0.164107	0.0275026	0.0555489	0.11147	0.0582223	8.04678e-11	7.4568e-11	0.0559248	1	0.395701
rs3761659	5:131657784	G:0.251795	rs11196205	10:114807047	G:0.45643	17971	6668	5	1	0.0559904	6.13752e-07	-0.178525	0.0357993	6.64795e-08	-0.138693	0.0256819	0.00873928	-0.121835	0.046465	0.000394433	-0.107642	0.0303749	0.0560939	-0.0590558	0.0309143	1.24594e-12	1.24471e-12	0.0559904	1	0.395701
rs7821832	8:25889446	G:0.302007	rs2074172	16:19529042	A:0.339604	17940	6624	5	1	0.0563197	0.000324025	-0.0991288	0.0275718	3.37905e-05	-0.111893	0.0269863	0.195497	-0.0491626	0.0379784	0.057305	-0.0676077	0.0355647	0.0563769	-0.0714321	0.037436	2.42699e-07	1.88217e-07	0.0563197	1	0.395701
rs4148427	13:95925674	T:0.252398	rs200349	14:99378300	T:0.291743	18033	6684	5	1	0.056452	1.20712e-05	-0.153717	0.0351249	6.25161e-06	-0.12401	0.0274498	0.00294476	-0.118171	0.0397421	0.00463193	-0.0914238	0.0322873	0.0566686	-0.0636728	0.033409	2.06922e-09	1.80779e-09	0.056452	1	0.395701
rs11196205	10:114807047	G:0.456455	rs1729752	13:95732362	G:0.297524	17970	6667	5	1	0.0565846	7.16882e-08	-0.138375	0.0256875	2.01001e-08	-0.17527	0.0312361	0.00056988	-0.106033	0.0307738	0.00147625	-0.127387	0.0400674	0.0567379	-0.0572485	0.0300466	5.02838e-14	5.32942e-14	0.0565846	1	0.395701
rs1604525	1:217377592	T:0.273854	rs2856610	16:19507031	T:0.338415	18037	6695	5	1	0.056651	2.56773e-05	-0.116996	0.0277981	1.8359e-05	-0.11509	0.0268653	1.07878e-05	-0.164387	0.0373543	5.66287e-06	-0.155616	0.0342873	0.0565096	0.0765219	0.0401251	1.43913e-08	1.20607e-08	0.056651	1	0.395701
rs74987670	10:112820864	G:0.0598023	rs11158715	14:68489386	T:0.305238	17909	6646	5	1	0.056651	1.00045e-05	-0.23711	0.0536802	0.00021614	0.107434	0.0290413	0.0471888	-0.143539	0.0723263	4.41047e-05	0.123583	0.0302539	0.0572311	-0.146762	0.0771803	5.3106e-08	4.30898e-08	0.056651	1	0.395701
rs1604525	1:217377592	T:0.273854	rs2856609	16:19506773	G:0.338415	18037	6695	5	1	0.056651	2.56773e-05	-0.116996	0.0277981	1.8359e-05	-0.11509	0.0268653	1.07878e-05	-0.164387	0.0373543	5.66287e-06	-0.155616	0.0342873	0.0565096	0.0765219	0.0401251	1.43913e-08	1.20607e-08	0.056651	1	0.395701
rs1604525	1:217377592	T:0.273851	rs2353696	16:19505813	T:0.338517	18039	6696	5	1	0.0567175	2.4125e-05	-0.117384	0.0277974	1.60042e-05	-0.115915	0.026867	1.03002e-05	-0.164773	0.0373568	5.06604e-06	-0.156442	0.0342922	0.0565686	0.0765021	0.0401243	1.19075e-08	1.0034e-08	0.0567175	1	0.395701
rs7821832	8:25889446	G:0.302423	rs1967952	16:19503828	T:0.338409	17993	6643	5	1	0.0568508	0.000215704	-0.101852	0.0275284	3.39785e-05	-0.111603	0.0269247	0.16736	-0.0522631	0.0378517	0.0582398	-0.0673267	0.0355494	0.0569435	-0.0712157	0.0374082	1.66316e-07	1.31321e-07	0.0568508	1	0.395701
rs7821832	8:25889446	G:0.302423	rs1475962	16:19503598	C:0.338409	17993	6643	5	1	0.0568508	0.000215704	-0.101852	0.0275284	3.39785e-05	-0.111603	0.0269247	0.16736	-0.0522631	0.0378517	0.0582398	-0.0673267	0.0355494	0.0569435	-0.0712157	0.0374082	1.66316e-07	1.31321e-07	0.0568508	1	0.395701
rs2972143	2:227116365	A:0.342133	rs621010	11:102353911	G:0.134004	17936	6636	5	1	0.0568508	1.04243e-09	-0.158509	0.0259732	0.132522	-0.0561019	0.0372961	9.84042e-06	-0.131119	0.0296605	0.821245	0.011629	0.0514687	0.0573207	-0.103436	0.0544153	2.19195e-09	1.92358e-09	0.0568508	1	0.395701
rs6585202	10:114782803	T:0.461703	rs1729752	13:95732362	G:0.298059	18030	6697	5	1	0.0569844	1.93378e-07	-0.132125	0.0253813	4.5879e-08	-0.170069	0.0311106	0.00110085	-0.0997123	0.0305547	0.00260456	-0.121299	0.0402864	0.0571072	-0.056995	0.0299581	2.83766e-13	2.9456e-13	0.0569844	1	0.395701
rs6585199	10:114765171	G:0.456817	rs10787472	10:114781297	A:0.452518	17912	6654	5	1	0.0570514	0.00179084	-0.471613	0.151018	0.0295289	0.328106	0.150759	0.0053261	-0.425595	0.152728	0.00851012	0.413167	0.15703	0.0570447	-0.0674658	0.0354529	5.71888e-09	4.92578e-09	0.0570514	1	0.395701
rs1604525	1:217377592	T:0.273812	rs1967951	16:19503773	T:0.338104	18027	6690	5	1	0.0571184	2.33894e-05	-0.11767	0.0278191	2.54304e-05	-0.113175	0.0268763	1.01325e-05	-0.165009	0.0373804	7.48975e-06	-0.153657	0.0343039	0.0569321	0.0765005	0.0401824	1.79804e-08	1.50882e-08	0.0571184	1	0.395701
rs2894593	2:227190317	T:0.383167	rs57225583	10:114771843	G:0.141473	18060	6697	5	1	0.0576575	3.01408e-06	-0.120526	0.0258093	1.28759e-05	-0.154464	0.0354097	0.00124893	-0.094373	0.0292406	0.11035	-0.0825845	0.0517245	0.0580913	-0.0964758	0.0509105	1.52575e-09	1.36514e-09	0.0576575	1	0.395701
rs11572103	10:96818106	T:0.479244	rs12265291	10:114810240	T:0.449312	18091	6707	5	1	0.0577931	4.18322e-06	-0.158997	0.0345491	1.11867e-08	-0.147232	0.0257773	0.00218902	-0.121785	0.0397558	0.00267026	-0.103656	0.0345136	0.057851	-0.0484007	0.0255167	1.59047e-12	1.62404e-12	0.0577931	1	0.395701
rs6585199	10:114765171	G:0.456312	chr10:114772253:i	10:114772253	C:0.44897	17911	6646	5	1	0.0579972	0.0773867	-0.25132	0.142306	0.445959	0.108786	0.142732	0.122166	-0.221298	0.143166	0.167802	0.210192	0.15239	0.0580078	-0.0676401	0.0356819	1.00091e-07	8.14187e-08	0.0579972	1	0.395701
rs8011527	14:68638685	A:0.319744	rs2074172	16:19529042	A:0.339544	17980	6662	5	1	0.0580654	0.000185051	0.1143	0.030573	1.39995e-05	-0.117077	0.0269523	3.92006e-05	0.159838	0.0388699	0.0430893	-0.0723654	0.0357741	0.0580837	-0.0642434	0.0339003	7.68173e-08	6.2983e-08	0.0580654	1	0.395701
chr10:114772253:i	10:114772253	C:0.449062	rs1729752	13:95732362	G:0.29733	18012	6677	5	1	0.0581337	1.5432e-07	-0.135266	0.0257781	8.11663e-08	-0.166863	0.0311049	0.000750167	-0.103556	0.0307237	0.00235788	-0.120406	0.0395941	0.0582769	-0.0567747	0.0299823	4.21432e-13	4.41883e-13	0.0581337	1	0.395701
rs6573817	14:68617269	G:0.318982	rs1967951	16:19503773	T:0.338065	18001	6678	5	1	0.0581337	0.000144901	0.11594	0.0305133	1.94854e-05	-0.114938	0.0269131	3.1889e-05	0.161376	0.0387966	0.0493109	-0.0702596	0.0357393	0.0581953	-0.0642442	0.0339158	8.29782e-08	6.79618e-08	0.0581337	1	0.395701
rs7821832	8:25889446	G:0.302003	rs2856611	16:19507199	G:0.338147	17970	6636	5	1	0.0582021	0.000191699	-0.102766	0.0275534	3.66441e-05	-0.111235	0.0269485	0.158846	-0.0533909	0.0378938	0.0587667	-0.0672158	0.0355651	0.0583572	-0.0709505	0.0374803	1.59166e-07	1.28238e-07	0.0582021	1	0.395701
rs6573817	14:68617269	G:0.319292	rs2856614	16:19512116	T:0.338452	18007	6680	5	1	0.0582705	0.000135849	0.116394	0.0305047	2.12643e-05	-0.114393	0.0269085	3.03111e-05	0.161837	0.0387995	0.0511122	-0.069718	0.035743	0.0583231	-0.0642012	0.0339104	8.47803e-08	6.95307e-08	0.0582705	1	0.395701
rs6573817	14:68617269	G:0.319292	rs1134662	16:19510249	G:0.338452	18007	6680	5	1	0.0582705	0.000135849	0.116394	0.0305047	2.12643e-05	-0.114393	0.0269085	3.03111e-05	0.161837	0.0387995	0.0511122	-0.069718	0.035743	0.0583231	-0.0642012	0.0339104	8.47803e-08	6.95307e-08	0.0582705	1	0.395701
rs7821832	8:25889446	G:0.302434	rs1475963	16:19505282	G:0.338391	17994	6645	5	1	0.0584764	0.000221088	-0.101666	0.0275248	3.29926e-05	-0.111783	0.0269243	0.166162	-0.0524068	0.0378486	0.0564716	-0.067803	0.0355477	0.0585988	-0.070741	0.0374055	1.65668e-07	1.3384e-07	0.0584764	1	0.395701
rs7821832	8:25889446	G:0.302434	rs1475964	16:19505406	T:0.338391	17994	6645	5	1	0.0584764	0.000221088	-0.101666	0.0275248	3.29926e-05	-0.111783	0.0269243	0.166162	-0.0524068	0.0378486	0.0564716	-0.067803	0.0355477	0.0585988	-0.070741	0.0374055	1.65668e-07	1.3384e-07	0.0584764	1	0.395701
rs7821832	8:25889446	G:0.302434	rs2245423	16:19505730	T:0.338391	17994	6645	5	1	0.0584764	0.000221088	-0.101666	0.0275248	3.29926e-05	-0.111783	0.0269243	0.166162	-0.0524068	0.0378486	0.0564716	-0.067803	0.0355477	0.0585988	-0.070741	0.0374055	1.65668e-07	1.3384e-07	0.0584764	1	0.395701
rs7821832	8:25889446	G:0.302434	rs4421962	16:19505852	C:0.338391	17994	6645	5	1	0.0584764	0.000221088	-0.101666	0.0275248	3.29926e-05	-0.111783	0.0269243	0.166162	-0.0524068	0.0378486	0.0564716	-0.067803	0.0355477	0.0585988	-0.070741	0.0374055	1.65668e-07	1.3384e-07	0.0584764	1	0.395701
rs7821832	8:25889446	G:0.302384	rs2856609	16:19506773	G:0.338345	17992	6644	5	1	0.0585452	0.00020909	-0.10207	0.0275285	3.49126e-05	-0.11144	0.0269256	0.162879	-0.0528197	0.0378513	0.0576862	-0.0674718	0.0355475	0.058648	-0.0707303	0.0374072	1.6583e-07	1.34094e-07	0.0585452	1	0.395701
rs7821832	8:25889446	G:0.302384	rs2856610	16:19507031	T:0.338345	17992	6644	5	1	0.0585452	0.00020909	-0.10207	0.0275285	3.49126e-05	-0.11144	0.0269256	0.162879	-0.0528197	0.0378513	0.0576862	-0.0674718	0.0355475	0.058648	-0.0707303	0.0374072	1.6583e-07	1.34094e-07	0.0585452	1	0.395701
rs1604525	1:217377592	T:0.273851	rs1475964	16:19505406	T:0.338461	18039	6696	5	1	0.0586141	2.42113e-05	-0.117361	0.0277972	1.73667e-05	-0.115417	0.0268642	1.07964e-05	-0.164377	0.0373535	5.65611e-06	-0.155624	0.0342872	0.0584974	0.0759099	0.0401226	1.28877e-08	1.11327e-08	0.0586141	1	0.395701
rs1604525	1:217377592	T:0.273851	rs2245423	16:19505730	T:0.338461	18039	6696	5	1	0.0586141	2.42113e-05	-0.117361	0.0277972	1.73667e-05	-0.115417	0.0268642	1.07964e-05	-0.164377	0.0373535	5.65611e-06	-0.155624	0.0342872	0.0584974	0.0759099	0.0401226	1.28877e-08	1.11327e-08	0.0586141	1	0.395701
rs1604525	1:217377592	T:0.273851	rs4421962	16:19505852	C:0.338461	18039	6696	5	1	0.0586141	2.42113e-05	-0.117361	0.0277972	1.73667e-05	-0.115417	0.0268642	1.07964e-05	-0.164377	0.0373535	5.65611e-06	-0.155624	0.0342872	0.0584974	0.0759099	0.0401226	1.28877e-08	1.11327e-08	0.0586141	1	0.395701
rs1604525	1:217377592	T:0.273851	rs1475963	16:19505282	G:0.338461	18039	6696	5	1	0.0586141	2.42113e-05	-0.117361	0.0277972	1.73667e-05	-0.115417	0.0268642	1.07964e-05	-0.164377	0.0373535	5.65611e-06	-0.155624	0.0342872	0.0584974	0.0759099	0.0401226	1.28877e-08	1.11327e-08	0.0586141	1	0.395701
rs1875574	1:217403246	G:0.274876	rs74987670	10:112820864	G:0.0594341	17919	6642	5	1	0.0587521	3.29735e-05	-0.115755	0.0278799	2.90744e-05	-0.224801	0.0537725	5.81196e-06	-0.133302	0.0294063	1.21985e-05	-0.31284	0.0715226	0.05784	0.158415	0.0835124	1.93279e-08	1.6565e-08	0.0587521	1	0.395701
rs7821832	8:25889446	G:0.302434	rs2353696	16:19505813	T:0.338446	17994	6645	5	1	0.0588212	0.00022117	-0.101664	0.0275249	3.0572e-05	-0.112263	0.0269271	0.165754	-0.0524599	0.0378505	0.054584	-0.0683346	0.0355507	0.0589092	-0.0706583	0.0374077	1.53968e-07	1.25228e-07	0.0588212	1	0.395701
rs6585199	10:114765171	G:0.457048	rs8011527	14:68638685	A:0.320506	17892	6635	5	1	0.0590292	1.37816e-08	-0.146331	0.0257803	0.000110952	0.118471	0.0306498	1.51781e-08	-0.183225	0.0323745	0.158871	0.0608983	0.0432247	0.0590079	0.0657366	0.0348156	7.14299e-11	6.93326e-11	0.0590292	1	0.395701
rs6585201	10:114768783	G:0.466494	rs35748167	18:58037433	G:0.169473	17997	6673	5	1	0.0590987	2.00137e-08	-0.14292	0.0254674	9.36536e-09	-0.258275	0.0449813	1.58706e-05	-0.120884	0.0280068	0.000860615	-0.191007	0.057316	0.059369	-0.0630759	0.033454	4.61812e-15	5.25016e-15	0.0590987	1	0.395701
rs4148475	13:95853574	T:0.245996	rs200352	14:99377084	G:0.292357	18108	6711	5	1	0.0591682	2.63877e-06	-0.166434	0.0354334	7.12717e-06	-0.122867	0.0273654	0.00216301	-0.126509	0.0412499	0.00666952	-0.0888129	0.0327371	0.0593481	-0.064811	0.0343715	5.27799e-10	4.93246e-10	0.0591682	1	0.395701
rs4148423	13:95931595	C:0.478483	rs4646362	17:17468641	C:0.496515	18079	6702	5	1	0.0593775	0.0176577	0.154464	0.0650998	0.0813472	-0.0902924	0.0518052	0.00270978	0.229637	0.0765743	0.771233	-0.0187317	0.0644227	0.0598195	-0.107265	0.0569916	3.97028e-07	3.16915e-07	0.0593775	1	0.395701
rs6585199	10:114765171	G:0.456856	rs10787473	10:114781400	C:0.452583	17905	6650	5	1	0.0593775	0.00283732	-0.452814	0.151705	0.0411613	0.309214	0.151435	0.00791014	-0.407387	0.15339	0.0125524	0.393657	0.157701	0.0594275	-0.0668415	0.0354594	8.18393e-09	7.2211e-09	0.0593775	1	0.395701
rs6585202	10:114782803	T:0.464296	rs11196208	10:114811316	T:0.457687	17855	6631	5	1	0.0594474	0.970567	-0.00238031	0.0645113	0.0286608	-0.142688	0.0652103	0.453334	0.0530686	0.0707707	0.351688	-0.0703384	0.0755254	0.0594983	-0.0659076	0.0349737	1.2591e-07	1.0385e-07	0.0594474	1	0.395701
rs6585199	10:114765171	G:0.456776	rs7899529	10:114779538	G:0.452557	17895	6639	5	1	0.0595174	0.000639535	-0.545525	0.159778	0.0114151	0.403605	0.159545	0.00191628	-0.500408	0.16127	0.0031646	0.488362	0.165475	0.0595646	-0.0668473	0.0354815	3.0611e-09	2.76767e-09	0.0595174	1	0.395701
rs10885405	10:114777670	C:0.461442	rs1729752	13:95732362	G:0.297718	18012	6678	5	1	0.0595875	2.22763e-07	-0.131577	0.0254046	5.76576e-08	-0.168924	0.0311328	0.00112694	-0.0995369	0.0305632	0.00274471	-0.120683	0.0402952	0.0597193	-0.0564452	0.0299784	4.12878e-13	4.41883e-13	0.0595875	1	0.395701
rs8011527	14:68638685	A:0.320033	rs2856608	16:19505751	G:0.334739	18020	6675	5	1	0.0595875	0.000187292	0.11409	0.0305414	1.0723e-05	-0.118358	0.026887	4.01223e-05	0.158823	0.0386735	0.0396381	-0.0736768	0.0358089	0.0596281	-0.0640258	0.0339924	6.22693e-08	5.24198e-08	0.0595875	1	0.395701
rs6585199	10:114765171	G:0.456602	rs1555944	14:68625118	G:0.322559	17789	6619	5	1	0.0596577	3.33205e-08	-0.142606	0.0258202	0.000101069	0.118878	0.0305754	3.25712e-08	-0.179812	0.0325333	0.156148	0.0612967	0.0432232	0.0595752	0.0657349	0.0348925	1.51513e-10	1.46186e-10	0.0596577	1	0.395701
rs1562692	3:34534267	G:0.121372	rs8192880	13:47369376	G:0.47341	18052	6698	5	1	0.059728	8.42604e-05	0.216148	0.0549723	2.12044e-07	0.217621	0.0419433	0.200707	0.104107	0.0813632	2.20095e-06	0.202188	0.0427094	0.0600015	0.10046	0.0534139	6.28003e-10	5.89261e-10	0.059728	1	0.395701
rs6585202	10:114782803	T:0.462072	rs6573817	14:68617269	G:0.318972	17942	6669	5	1	0.059728	1.78524e-07	-0.132746	0.0254282	9.36927e-05	0.119253	0.0305278	1.36488e-07	-0.170122	0.0322817	0.156341	0.0613906	0.0433095	0.0597166	0.0649922	0.0345174	7.00588e-10	6.55865e-10	0.059728	1	0.395701
rs6585202	10:114782803	T:0.461581	rs11158715	14:68489386	T:0.306177	17921	6666	5	1	0.0602224	9.13858e-08	-0.136004	0.0254544	0.000100875	0.112696	0.028982	8.74476e-08	-0.173882	0.0324949	0.203557	0.0541227	0.0425666	0.0602734	0.0666011	0.035449	3.96851e-10	3.78447e-10	0.0602224	1	0.395701
rs1532716	1:217402689	A:0.274848	rs74987670	10:112820864	G:0.0594515	17939	6651	5	1	0.0603644	3.73625e-05	-0.114891	0.0278644	2.42508e-05	-0.227001	0.0537705	6.72723e-06	-0.132311	0.0293884	1.09536e-05	-0.314444	0.0715061	0.0594475	0.15742	0.0835177	1.83529e-08	1.60982e-08	0.0603644	1	0.395701
rs7896811	10:114766717	T:0.13822	rs114863326	10:114783775	C:0.138833	17928	6638	5	1	0.0606496	0.958809	0.0268437	0.51974	0.715925	-0.188791	0.518786	0.827398	-0.114544	0.525336	0.669626	-0.221541	0.519244	0.0591844	0.134112	0.0710785	3.27963e-05	2.30204e-05	0.0606496	1	0.395701
rs117537110	6:30649931	G:0.449294	rs6585201	10:114768783	G:0.466474	17986	6667	5	1	0.0607211	5.04001e-07	0.619843	0.123357	1.21488e-08	-0.145058	0.0254593	6.3491e-06	0.569312	0.12611	1.80492e-08	-0.182818	0.0324737	0.0607028	0.0483289	0.0257664	2.83766e-13	3.10251e-13	0.0607211	1	0.395701
rs6604661	1:217409199	T:0.274771	rs74987670	10:112820864	G:0.0594839	17904	6636	5	1	0.0609362	3.29438e-05	-0.115827	0.027896	2.33024e-05	-0.227615	0.0538016	5.95213e-06	-0.1332	0.0294165	1.07189e-05	-0.314894	0.0715321	0.0599425	0.157333	0.0836338	1.56675e-08	1.3901e-08	0.0609362	1	0.395701
rs1555944	14:68625118	G:0.322248	rs1967951	16:19503773	T:0.33843	17921	6662	5	1	0.0610801	0.00017914	0.114109	0.0304555	1.02944e-05	-0.118888	0.0269533	4.07012e-05	0.159046	0.0387589	0.0388169	-0.0742491	0.0359365	0.0611339	-0.0635723	0.03395	5.53835e-08	4.77079e-08	0.0610801	1	0.395701
rs1555944	14:68625118	G:0.322586	rs1134662	16:19510249	G:0.338819	17927	6664	5	1	0.0610801	0.000170091	0.114473	0.0304472	1.12621e-05	-0.118342	0.0269487	3.90135e-05	0.159438	0.038762	0.0403393	-0.0736864	0.03594	0.0611454	-0.0635595	0.0339447	5.73652e-08	4.93703e-08	0.0610801	1	0.395701
rs1555944	14:68625118	G:0.322586	rs2856614	16:19512116	T:0.338819	17927	6664	5	1	0.0610801	0.000170091	0.114473	0.0304472	1.12621e-05	-0.118342	0.0269487	3.90135e-05	0.159438	0.038762	0.0403393	-0.0736864	0.03594	0.0611454	-0.0635595	0.0339447	5.73652e-08	4.93703e-08	0.0610801	1	0.395701
rs6585202	10:114782803	T:0.463783	rs11196205	10:114807047	G:0.457439	17892	6650	5	1	0.0611521	0.785941	-0.0176092	0.0648385	0.0574702	-0.12438	0.065473	0.595753	0.0377334	0.0711255	0.484562	-0.0528792	0.0756514	0.0611405	-0.0654064	0.0349304	2.82637e-07	2.33257e-07	0.0611521	1	0.395701
rs7904519	10:114773927	A:0.450117	rs1729752	13:95732362	G:0.296943	18022	6682	5	1	0.0612965	1.03594e-07	-0.136948	0.0257407	3.92489e-08	-0.17096	0.0311165	0.000575333	-0.105654	0.0306868	0.00160735	-0.125009	0.0396278	0.0614879	-0.055991	0.0299422	1.402e-13	1.56181e-13	0.0612965	1	0.395701
rs10885405	10:114777670	C:0.464087	rs11196208	10:114811316	T:0.457808	17835	6612	5	1	0.0612965	0.944411	-0.00451172	0.0647061	0.032672	-0.139689	0.0653945	0.472676	0.0510128	0.0710354	0.367058	-0.068177	0.0755844	0.0612892	-0.0654992	0.035	1.60571e-07	1.34861e-07	0.0612965	1	0.395701
rs1875574	1:217403246	G:0.274463	rs2856608	16:19505751	G:0.334788	17986	6668	5	1	0.0613688	3.78093e-05	-0.114663	0.0278275	1.13722e-05	-0.1181	0.0269064	1.57772e-05	-0.160832	0.0372507	4.28435e-06	-0.158084	0.0343878	0.0612043	0.0754041	0.0402796	1.31291e-08	1.17655e-08	0.0613688	1	0.395701
rs599136	10:112823415	A:0.0600445	rs62026181	16:19506239	T:0.335121	17995	6674	5	1	0.0615864	1.14668e-05	-0.234417	0.0534285	2.69099e-05	-0.113053	0.0269293	1.05471e-05	-0.333315	0.0756564	4.89265e-06	-0.129541	0.0283501	0.0613192	0.140948	0.0753252	7.19413e-09	6.55794e-09	0.0615864	1	0.395701
rs1502364	1:217392174	G:0.27436	rs2856608	16:19505751	G:0.335129	18011	6675	5	1	0.0618047	2.68928e-05	-0.116778	0.0278155	1.23712e-05	-0.117565	0.026897	1.2252e-05	-0.162896	0.03725	4.60984e-06	-0.157414	0.0343563	0.0616167	0.075269	0.0402714	1.0285e-08	9.32377e-09	0.0618047	1	0.395701
rs10787472	10:114781297	A:0.452282	rs12265291	10:114810240	T:0.449731	18033	6694	5	1	0.0619508	0.446201	0.0600481	0.0788277	0.00899725	-0.207109	0.0792867	0.16372	0.11758	0.0844279	0.116005	-0.137389	0.0874106	0.0620131	-0.0657566	0.0352355	3.19285e-08	2.8211e-08	0.0619508	1	0.395701
rs1000796	1:217402330	A:0.274858	rs74987670	10:112820864	G:0.0594973	17942	6651	5	1	0.0619508	3.73931e-05	-0.114898	0.0278675	2.29058e-05	-0.227664	0.0537639	6.84625e-06	-0.132221	0.0293927	1.08558e-05	-0.314607	0.0715117	0.0610283	0.156466	0.0835246	1.72747e-08	1.54962e-08	0.0619508	1	0.395701
rs1532716	1:217402689	A:0.274421	rs2856608	16:19505751	G:0.335147	18007	6677	5	1	0.0619508	4.47603e-05	-0.113499	0.0278087	1.32975e-05	-0.117103	0.0268884	1.83137e-05	-0.159597	0.0372498	4.93346e-06	-0.156969	0.0343659	0.0618215	0.0751832	0.0402571	1.79103e-08	1.60523e-08	0.0619508	1	0.395701
rs10787473	10:114781400	C:0.452374	rs12265291	10:114810240	T:0.449795	18026	6690	5	1	0.0620971	0.46604	0.0575014	0.0788838	0.00981805	-0.20486	0.0793364	0.173426	0.114995	0.0844754	0.122419	-0.13511	0.0874667	0.0620881	-0.0657489	0.0352415	3.15566e-08	2.79436e-08	0.0620971	1	0.395701
rs4148475	13:95853574	T:0.24638	rs200349	14:99378300	T:0.291674	18027	6678	5	1	0.0624648	3.34573e-06	-0.164911	0.0354771	5.43233e-06	-0.124936	0.0274745	0.00241446	-0.125364	0.0413217	0.0055179	-0.0911967	0.0328621	0.062631	-0.0643089	0.0345412	5.09566e-10	4.97985e-10	0.0624648	1	0.395701
rs6573817	14:68617269	G:0.319065	rs2521791	16:19508824	C:0.33833	18012	6686	5	1	0.0625385	0.000147518	0.115762	0.0305021	1.67842e-05	-0.115784	0.0269023	3.53405e-05	0.160423	0.0387871	0.0442717	-0.0718713	0.03573	0.0625997	-0.0631289	0.0339034	7.31566e-08	6.37665e-08	0.0625385	1	0.395701
rs12258200	10:114781698	T:0.449331	rs11158715	14:68489386	T:0.306574	17950	6672	5	1	0.0626124	3.39806e-08	-0.14247	0.0258117	0.000144307	0.110066	0.0289596	3.47026e-08	-0.179024	0.032456	0.200398	0.0536592	0.0419075	0.0625938	0.0663615	0.0356387	2.2045e-10	2.1957e-10	0.0626124	1	0.395701
rs1502364	1:217392174	G:0.27483	rs599136	10:112823415	A:0.0598595	17942	6650	5	1	0.0626124	2.0131e-05	-0.118858	0.0278785	3.55209e-05	-0.22153	0.0535764	3.64738e-06	-0.13621	0.0294157	1.53713e-05	-0.307789	0.0711931	0.0616661	0.155623	0.0832792	1.45042e-08	1.31786e-08	0.0626124	1	0.395701
rs6573817	14:68617269	G:0.319027	rs2187659	16:19508573	A:0.338321	18011	6686	5	1	0.0626124	0.000145346	0.115874	0.030502	1.67329e-05	-0.1158	0.0269019	3.49505e-05	0.160521	0.0387866	0.0441839	-0.0719006	0.0357298	0.0626805	-0.0631076	0.0339024	7.19521e-08	6.28035e-08	0.0626124	1	0.395701
rs6573817	14:68617269	G:0.319027	rs2187660	16:19508583	C:0.338321	18011	6686	5	1	0.0626124	0.000145346	0.115874	0.030502	1.67329e-05	-0.1158	0.0269019	3.49505e-05	0.160521	0.0387866	0.0441839	-0.0719006	0.0357298	0.0626805	-0.0631076	0.0339024	7.19521e-08	6.28035e-08	0.0626124	1	0.395701
rs7918599	10:114777396	C:0.449548	rs1729752	13:95732362	G:0.297806	18047	6694	5	1	0.0627605	1.19085e-07	-0.136226	0.0257278	6.37498e-08	-0.167995	0.0310645	0.000622074	-0.10504	0.0306972	0.00194363	-0.122487	0.0395283	0.0629922	-0.0555135	0.0298581	2.56863e-13	2.88951e-13	0.0627605	1	0.395701
rs3761659	5:131657784	G:0.249736	chr10:114772253:i	10:114772253	C:0.449037	18013	6678	5	1	0.0629089	4.21895e-07	-0.181168	0.0358125	1.5276e-07	-0.135312	0.0257777	0.0064279	-0.126339	0.0463611	0.000536601	-0.105266	0.0304081	0.0630508	-0.057553	0.0309619	1.83241e-12	2.00027e-12	0.0629089	1	0.395701
rs6585199	10:114765171	G:0.45688	rs12258200	10:114781698	T:0.449791	17915	6655	5	1	0.0629833	0.0646018	-0.232296	0.125701	0.490405	0.0869185	0.12603	0.12626	-0.194505	0.127209	0.188386	0.177566	0.134993	0.0629942	-0.0661054	0.0355552	5.6531e-08	4.98896e-08	0.0629833	1	0.395701
rs905293	1:217405444	T:0.274904	rs599136	10:112823415	A:0.0598527	17919	6641	5	1	0.0631323	2.56038e-05	-0.117405	0.027891	3.58103e-05	-0.221402	0.0535697	4.68836e-06	-0.134749	0.0294324	1.56744e-05	-0.307535	0.0712053	0.0622004	0.155288	0.0832706	1.84428e-08	1.67714e-08	0.0631323	1	0.395701
rs6585199	10:114765171	G:0.456745	rs11196191	10:114780633	A:0.449685	17917	6656	5	1	0.0632069	0.0819072	-0.219455	0.126143	0.556917	0.0742884	0.126464	0.154114	-0.181884	0.127625	0.222973	0.165043	0.13543	0.0632597	-0.0660472	0.0355597	6.80564e-08	5.99438e-08	0.0632069	1	0.395701
rs74987670	10:112820864	G:0.0596521	rs62026181	16:19506239	T:0.33513	17996	6673	5	1	0.0632817	9.06352e-06	-0.238032	0.0536304	2.71917e-05	-0.112955	0.026921	9.18986e-06	-0.33638	0.0758397	5.06103e-06	-0.1292	0.0283195	0.0630444	0.140807	0.0757486	5.79195e-09	5.42406e-09	0.0632817	1	0.395701
rs10885405	10:114777670	C:0.463574	rs11196205	10:114807047	G:0.457531	17872	6631	5	1	0.0634314	0.795619	-0.0168514	0.0650583	0.0579147	-0.124563	0.0656862	0.590462	0.0384294	0.0714081	0.475861	-0.0540041	0.0757447	0.0634895	-0.0648732	0.034958	3.24045e-07	2.74355e-07	0.0634314	1	0.395701
rs6585201	10:114768783	G:0.468699	rs10885409	10:114808072	T:0.456549	17859	6626	5	1	0.0634314	0.210748	-0.074429	0.0594712	0.213295	-0.0746609	0.05999	0.734524	-0.0222645	0.065655	0.995545	-0.000401883	0.0719773	0.0634642	-0.0650232	0.0350355	9.70114e-08	8.48967e-08	0.0634314	1	0.395701
rs1604525	1:217377592	T:0.273937	rs2187660	16:19508583	C:0.33836	18037	6698	5	1	0.0635064	2.4901e-05	-0.117158	0.0277909	2.18774e-05	-0.114038	0.0268653	1.22712e-05	-0.163268	0.0373379	7.57257e-06	-0.153479	0.0342822	0.0633751	0.0744806	0.0401177	1.65481e-08	1.51603e-08	0.0635064	1	0.395701
rs1604525	1:217377592	T:0.273937	rs2187659	16:19508573	A:0.33836	18037	6698	5	1	0.0635064	2.4901e-05	-0.117158	0.0277909	2.18774e-05	-0.114038	0.0268653	1.22712e-05	-0.163268	0.0373379	7.57257e-06	-0.153479	0.0342822	0.0633751	0.0744806	0.0401177	1.65481e-08	1.51603e-08	0.0635064	1	0.395701
rs11158715	14:68489386	T:0.306322	rs1134662	16:19510249	G:0.339236	17986	6677	5	1	0.0636568	0.000192868	0.107918	0.0289466	2.48407e-05	-0.113517	0.0269237	5.59232e-05	0.154821	0.038423	0.0480549	-0.0703074	0.0355648	0.0636993	-0.0658781	0.0355276	1.31439e-07	1.1442e-07	0.0636568	1	0.395701
rs11158715	14:68489386	T:0.306322	rs2856614	16:19512116	T:0.339236	17986	6677	5	1	0.0636568	0.000192868	0.107918	0.0289466	2.48407e-05	-0.113517	0.0269237	5.59232e-05	0.154821	0.038423	0.0480549	-0.0703074	0.0355648	0.0636993	-0.0658781	0.0355276	1.31439e-07	1.1442e-07	0.0636568	1	0.395701
rs6573817	14:68617269	G:0.318992	rs2353696	16:19505813	T:0.338478	18013	6684	5	1	0.0636568	0.000139082	0.116205	0.0305017	1.2124e-05	-0.117713	0.0269038	3.44285e-05	0.16072	0.0388025	0.0382304	-0.0740236	0.0357192	0.0637435	-0.0628502	0.0339004	5.10217e-08	4.55347e-08	0.0636568	1	0.395701
rs6677242	1:217398785	A:0.276498	rs74987670	10:112820864	G:0.0595651	17888	6632	5	1	0.0637321	2.90808e-05	-0.116446	0.0278543	3.29861e-05	-0.223356	0.0537973	5.38589e-06	-0.133672	0.0293838	1.50569e-05	-0.309902	0.0716064	0.062852	0.155282	0.0834742	1.97283e-08	1.8048e-08	0.0637321	1	0.395701
rs1604525	1:217377592	T:0.273949	rs2521791	16:19508824	C:0.338369	18038	6698	5	1	0.0638829	2.44195e-05	-0.117279	0.0277906	2.19325e-05	-0.114025	0.0268658	1.21839e-05	-0.163328	0.0373383	7.64374e-06	-0.153412	0.0342825	0.0637374	0.0743801	0.0401184	1.62916e-08	1.50022e-08	0.0638829	1	0.395701
rs1000796	1:217402330	A:0.274431	rs2856608	16:19505751	G:0.335203	18010	6677	5	1	0.0639585	4.46857e-05	-0.113522	0.0278116	1.30609e-05	-0.11721	0.0268887	1.90817e-05	-0.159295	0.0372587	5.06851e-06	-0.156783	0.0343676	0.0637995	0.0746275	0.0402613	1.75296e-08	1.61289e-08	0.0639585	1	0.395701
rs6997996	8:25891653	G:0.277393	rs11196205	10:114807047	G:0.456982	17888	6615	5	1	0.0641859	8.20993e-05	-0.110074	0.0279504	7.66581e-08	-0.138374	0.0257448	8.32508e-05	-0.172353	0.0438018	7.81223e-08	-0.175548	0.0326819	0.0641951	0.0698588	0.0377448	1.3241e-10	1.35928e-10	0.0641859	1	0.395701
rs1604525	1:217377592	T:0.274077	rs2856611	16:19507199	G:0.338218	18015	6687	5	1	0.0641859	3.16292e-05	-0.115683	0.0277991	1.93931e-05	-0.114855	0.0268871	1.49903e-05	-0.161714	0.0373574	6.98614e-06	-0.154296	0.0343329	0.0640482	0.0743294	0.040138	1.8335e-08	1.68998e-08	0.0641859	1	0.395701
rs6585199	10:114765171	G:0.456785	rs10885406	10:114777724	A:0.4524	17899	6641	5	1	0.0642618	0.00275433	-0.472338	0.157767	0.0365974	0.32919	0.15749	0.0070722	-0.428849	0.159221	0.0115412	0.413292	0.163623	0.0642376	-0.0656665	0.0354853	8.32093e-09	7.82338e-09	0.0642618	1	0.395701
rs6573817	14:68617269	G:0.319154	rs2521793	16:19511391	C:0.340899	17866	6628	5	1	0.0643379	0.000174716	0.115057	0.0306572	1.38876e-05	-0.117256	0.0269826	4.28158e-05	0.159995	0.039102	0.0399934	-0.0735633	0.0358179	0.0643866	-0.0630268	0.0340778	7.25872e-08	6.47442e-08	0.0643379	1	0.395701
rs6585202	10:114782803	T:0.46226	rs8011527	14:68638685	A:0.320234	17965	6669	5	1	0.0643379	1.40973e-07	-0.133825	0.0254227	0.000131675	0.116764	0.0305402	1.27335e-07	-0.170583	0.0322912	0.165397	0.0600318	0.0432772	0.0643624	0.0636614	0.0344178	7.78515e-10	7.72344e-10	0.0643379	1	0.395701
rs10885406	10:114777724	A:0.452189	rs12265291	10:114810240	T:0.449775	18019	6679	5	1	0.0644141	0.466057	0.0572587	0.078554	0.00983658	-0.204005	0.0790251	0.174118	0.114441	0.0842041	0.121129	-0.135071	0.0871398	0.0645108	-0.0651574	0.0352463	3.70016e-08	3.36119e-08	0.0644141	1	0.395701
rs1604525	1:217377592	T:0.273914	rs1134662	16:19510249	G:0.338491	18033	6692	5	1	0.0644903	2.50967e-05	-0.117134	0.0277969	2.76638e-05	-0.112643	0.0268717	1.26313e-05	-0.163107	0.0373552	9.3788e-06	-0.151957	0.0342939	0.0643706	0.074222	0.0401286	2.08576e-08	1.92375e-08	0.0644903	1	0.395701
rs1604525	1:217377592	T:0.273914	rs2856614	16:19512116	T:0.338491	18033	6692	5	1	0.0644903	2.50967e-05	-0.117134	0.0277969	2.76638e-05	-0.112643	0.0268717	1.26313e-05	-0.163107	0.0373552	9.3788e-06	-0.151957	0.0342939	0.0643706	0.074222	0.0401286	2.08576e-08	1.92375e-08	0.0644903	1	0.395701
rs2894593	2:227190317	T:0.38279	rs7896811	10:114766717	T:0.13942	18100	6708	5	1	0.0646431	3.33193e-06	-0.119897	0.0257887	8.35717e-06	-0.158619	0.0355981	0.00118956	-0.0945975	0.0291844	0.0904064	-0.0881448	0.0520564	0.0651189	-0.0941286	0.0510337	1.11191e-09	1.09895e-09	0.0646431	1	0.395701
rs6585202	10:114782803	T:0.464198	rs12718338	10:114813047	C:0.458291	17862	6634	5	1	0.0649499	0.980365	0.00158761	0.0645078	0.0243133	-0.146809	0.0651862	0.426057	0.0564248	0.0708892	0.309686	-0.0765419	0.0753454	0.0649571	-0.0645091	0.0349538	1.12535e-07	9.99758e-08	0.0649499	1	0.395701
rs4646698	3:125886441	C:0.478846	rs7708975	5:132650567	T:0.0961337	18105	6715	5	1	0.0649499	1.68038e-08	0.263193	0.0466485	0.000193848	-0.159833	0.0428862	7.33417e-08	0.252888	0.0469808	6.58399e-05	-0.230903	0.0578584	0.0649191	0.0800241	0.0433543	8.82903e-11	9.22342e-11	0.0649499	1	0.395701
rs905293	1:217405444	T:0.274448	rs2856608	16:19505751	G:0.334742	17987	6666	5	1	0.0651039	3.27519e-05	-0.115596	0.0278315	1.09797e-05	-0.118317	0.0269091	1.52677e-05	-0.161112	0.0372531	4.50236e-06	-0.157732	0.0343888	0.0649671	0.0743507	0.0402879	1.10558e-08	1.0434e-08	0.0651039	1	0.395701
rs6573817	14:68617269	G:0.318818	rs62026181	16:19506239	T:0.335592	18004	6682	5	1	0.0654905	0.000134736	0.116466	0.0305074	2.41566e-05	-0.11359	0.0269009	3.42036e-05	0.160378	0.0387058	0.0504022	-0.0700113	0.0357833	0.0655618	-0.0625782	0.0339839	9.62564e-08	8.6444e-08	0.0654905	1	0.395701
rs10885405	10:114777670	C:0.461811	rs6573817	14:68617269	G:0.318902	17924	6650	5	1	0.0656458	2.11767e-07	-0.132061	0.0254516	0.000107888	0.118293	0.0305498	1.77717e-07	-0.168562	0.0322837	0.154505	0.0616957	0.0433318	0.0655909	0.0636507	0.0345701	9.26317e-10	9.30591e-10	0.0656458	1	0.395701
rs1562692	3:34534267	G:0.121598	rs12258200	10:114781698	T:0.450211	18006	6688	5	1	0.0656458	7.98183e-05	0.21681	0.054959	2.9945e-08	-0.14277	0.0257625	0.0497636	0.137247	0.069953	5.66482e-09	-0.161717	0.0277561	0.065764	0.0836467	0.0454595	9.16283e-11	9.64804e-11	0.0656458	1	0.395701
rs7708975	5:132650567	T:0.0961303	rs6585200	10:114768609	A:0.453603	17986	6676	5	1	0.0657236	0.000209195	-0.159374	0.0429851	1.0327e-08	-0.147736	0.0258043	0.000103469	-0.24242	0.0624423	1.91481e-09	-0.165339	0.0275341	0.0653277	0.10737	0.0582582	6.32834e-11	6.71753e-11	0.0657236	1	0.395701
rs1555944	14:68625118	G:0.322329	rs2521791	16:19508824	C:0.338696	17932	6670	5	1	0.0657236	0.000182587	0.113921	0.0304443	8.82845e-06	-0.119734	0.0269425	4.51665e-05	0.158071	0.0387493	0.0346811	-0.0758802	0.035927	0.0657924	-0.0624393	0.0339375	4.86377e-08	4.45914e-08	0.0657236	1	0.395701
rs6677242	1:217398785	A:0.276395	rs2972143	2:227116365	A:0.341992	17920	6631	5	1	0.0658015	3.73245e-05	-0.114717	0.0278207	5.12665e-10	-0.161644	0.026008	0.0959646	-0.0646887	0.0388581	0.000379516	-0.121067	0.0340657	0.0661031	-0.0743681	0.0404675	6.12582e-13	7.06223e-13	0.0658015	1	0.395701
rs6573817	14:68617269	G:0.31901	rs1475962	16:19503598	C:0.338441	18012	6682	5	1	0.0658015	0.000135201	0.116419	0.030502	1.36104e-05	-0.117022	0.0269013	3.4905e-05	0.160561	0.0387937	0.0391736	-0.0736668	0.0357197	0.0658348	-0.0623563	0.0338977	5.52215e-08	5.05105e-08	0.0658015	1	0.395701
rs6573817	14:68617269	G:0.31901	rs1967952	16:19503828	T:0.338441	18012	6682	5	1	0.0658015	0.000135201	0.116419	0.030502	1.36104e-05	-0.117022	0.0269013	3.4905e-05	0.160561	0.0387937	0.0391736	-0.0736668	0.0357197	0.0658348	-0.0623563	0.0338977	5.52215e-08	5.05105e-08	0.0658015	1	0.395701
rs1555944	14:68625118	G:0.322291	rs2187659	16:19508573	A:0.338687	17931	6670	5	1	0.0658795	0.000179936	0.114033	0.0304442	8.80066e-06	-0.11975	0.026942	4.46773e-05	0.158167	0.0387488	0.0346092	-0.0759098	0.0359268	0.0658784	-0.0624177	0.0339365	4.78369e-08	4.39595e-08	0.0658795	1	0.395701
rs1555944	14:68625118	G:0.322291	rs2187660	16:19508583	C:0.338687	17931	6670	5	1	0.0658795	0.000179936	0.114033	0.0304442	8.80066e-06	-0.11975	0.026942	4.46773e-05	0.158167	0.0387488	0.0346092	-0.0759098	0.0359268	0.0658784	-0.0624177	0.0339365	4.78369e-08	4.39595e-08	0.0658795	1	0.395701
rs1555944	14:68625118	G:0.322475	rs2521793	16:19511391	C:0.34125	17789	6613	5	1	0.0660359	0.000235381	0.112523	0.0305963	7.89564e-06	-0.120745	0.0270244	5.71534e-05	0.157196	0.039062	0.0328923	-0.0768491	0.036022	0.0661006	-0.0626955	0.0341155	5.62556e-08	5.15788e-08	0.0660359	1	0.395701
rs11158715	14:68489386	T:0.306034	rs1967951	16:19503773	T:0.338849	17980	6675	5	1	0.0661142	0.000193504	0.107923	0.0289545	2.28517e-05	-0.114042	0.0269282	5.87496e-05	0.15436	0.0384192	0.0450533	-0.0712645	0.0355583	0.0662178	-0.0652855	0.0355402	1.21561e-07	1.09318e-07	0.0661142	1	0.395701
rs6585202	10:114782803	T:0.46179	rs1555944	14:68625118	G:0.322276	17862	6653	5	1	0.0661926	2.93497e-07	-0.13058	0.0254663	0.000120899	0.117123	0.0304666	2.468e-07	-0.167492	0.0324591	0.161231	0.0606298	0.0432778	0.0661559	0.0634248	0.0345194	1.42772e-09	1.43056e-09	0.0661926	1	0.395701
rs7821832	8:25889446	G:0.302062	rs8011527	14:68638685	A:0.319365	17945	6623	5	1	0.0662711	0.000224943	-0.101771	0.0275862	0.000244181	0.112437	0.0306512	0.126281	-0.0564947	0.0369504	5.07455e-05	0.152706	0.037685	0.0664303	-0.0655211	0.0356964	1.15446e-06	9.75137e-07	0.0662711	1	0.395701
rs74987670	10:112820864	G:0.0596144	rs1134662	16:19510249	G:0.338074	17999	6671	5	1	0.0663497	1.08417e-05	-0.236011	0.053643	2.57755e-05	-0.113315	0.026929	1.13426e-05	-0.333652	0.0760053	4.9487e-06	-0.129338	0.0283204	0.0661142	0.138672	0.0754615	6.5824e-09	6.38511e-09	0.0663497	1	0.395701
rs74987670	10:112820864	G:0.0596144	rs2856614	16:19512116	T:0.338074	17999	6671	5	1	0.0663497	1.08417e-05	-0.236011	0.053643	2.57755e-05	-0.113315	0.026929	1.13426e-05	-0.333652	0.0760053	4.9487e-06	-0.129338	0.0283204	0.0661142	0.138672	0.0754615	6.5824e-09	6.38511e-09	0.0663497	1	0.395701
rs6573817	14:68617269	G:0.318992	rs4421962	16:19505852	C:0.338422	18013	6684	5	1	0.0664284	0.000139848	0.116162	0.0305013	1.3201e-05	-0.1172	0.0269009	3.63879e-05	0.160185	0.0387924	0.0383813	-0.0739634	0.035718	0.0665508	-0.0621887	0.0338959	5.53835e-08	5.10419e-08	0.0664284	1	0.395701
rs6573817	14:68617269	G:0.318992	rs2245423	16:19505730	T:0.338422	18013	6684	5	1	0.0664284	0.000139848	0.116162	0.0305013	1.3201e-05	-0.1172	0.0269009	3.63879e-05	0.160185	0.0387924	0.0383813	-0.0739634	0.035718	0.0665508	-0.0621887	0.0338959	5.53835e-08	5.10419e-08	0.0664284	1	0.395701
rs6573817	14:68617269	G:0.318992	rs1475963	16:19505282	G:0.338422	18013	6684	5	1	0.0664284	0.000139848	0.116162	0.0305013	1.3201e-05	-0.1172	0.0269009	3.63879e-05	0.160185	0.0387924	0.0383813	-0.0739634	0.035718	0.0665508	-0.0621887	0.0338959	5.53835e-08	5.10419e-08	0.0664284	1	0.395701
rs6573817	14:68617269	G:0.318992	rs1475964	16:19505406	T:0.338422	18013	6684	5	1	0.0664284	0.000139848	0.116162	0.0305013	1.3201e-05	-0.1172	0.0269009	3.63879e-05	0.160185	0.0387924	0.0383813	-0.0739634	0.035718	0.0665508	-0.0621887	0.0338959	5.53835e-08	5.10419e-08	0.0664284	1	0.395701
rs3761659	5:131657784	G:0.250249	rs11196191	10:114780633	A:0.449369	18062	6705	5	1	0.0666651	4.15974e-07	-0.181188	0.0357973	7.42915e-08	-0.138458	0.0257334	0.00596679	-0.127288	0.0462933	0.000342798	-0.108788	0.0303826	0.0668184	-0.0565569	0.0308566	9.15115e-13	1.05924e-12	0.0666651	1	0.395701
rs6573817	14:68617269	G:0.318399	rs2856611	16:19507199	G:0.338216	17990	6675	5	1	0.0667442	0.000149921	0.115696	0.0305169	1.42158e-05	-0.116865	0.0269243	3.88641e-05	0.159773	0.0388352	0.0391544	-0.0736887	0.0357268	0.0667755	-0.0622042	0.0339324	6.3933e-08	5.89262e-08	0.0667442	1	0.395701
rs6677242	1:217398785	A:0.276064	rs2856608	16:19505751	G:0.334874	17956	6658	5	1	0.0667442	3.50446e-05	-0.115029	0.0277987	1.03959e-05	-0.118735	0.0269316	1.6724e-05	-0.160311	0.0372413	4.51772e-06	-0.158142	0.0344835	0.0665863	0.0739085	0.040289	1.1329e-08	1.09017e-08	0.0667442	1	0.395701
rs1875574	1:217403246	G:0.274919	rs599136	10:112823415	A:0.0598281	17918	6643	5	1	0.0667442	2.97246e-05	-0.116445	0.0278873	3.66595e-05	-0.221125	0.0535726	5.66893e-06	-0.133552	0.0294273	1.71693e-05	-0.306151	0.0712172	0.0657803	0.153221	0.0832759	2.17309e-08	2.05836e-08	0.0667442	1	0.395701
rs6585201	10:114768783	G:0.466836	rs10787472	10:114781297	A:0.452411	17956	6667	5	1	0.0668234	0.022084	-0.218736	0.0955631	0.421777	0.0773685	0.0963083	0.0529757	-0.187692	0.0969924	0.113602	0.173303	0.109532	0.0668314	-0.0651581	0.035551	6.64798e-08	6.12695e-08	0.0668234	1	0.395701
rs10885405	10:114777670	C:0.463989	rs12718338	10:114813047	C:0.458413	17842	6615	5	1	0.0669027	0.992813	-0.000582828	0.0647035	0.027865	-0.143763	0.0653713	0.445224	0.0543209	0.0711563	0.324292	-0.0743255	0.0754055	0.0668799	-0.0641012	0.0349806	1.44357e-07	1.3045e-07	0.0669027	1	0.395701
rs1555944	14:68625118	G:0.322255	rs2353696	16:19505813	T:0.338845	17933	6668	5	1	0.0669821	0.000171922	0.11438	0.030444	6.3139e-06	-0.121668	0.0269441	4.39907e-05	0.158371	0.0387645	0.0297703	-0.0780504	0.0359161	0.0670485	-0.0621456	0.0339343	3.35262e-08	3.15051e-08	0.0669821	1	0.395701
rs6585201	10:114768783	G:0.466737	rs10787473	10:114781400	C:0.452502	17948	6662	5	1	0.0670616	0.0291162	-0.21051	0.0964797	0.477479	0.0690608	0.0972191	0.0667015	-0.179496	0.0978885	0.134955	0.164926	0.11033	0.067068	-0.0651104	0.0355558	7.78748e-08	7.1679e-08	0.0670616	1	0.395701
rs117537110	6:30649931	G:0.449245	rs6585199	10:114765171	G:0.456349	17949	6660	5	1	0.0671413	5.34359e-07	0.618979	0.123461	1.15295e-08	-0.146875	0.0257381	6.48707e-06	0.56934	0.126243	1.78562e-08	-0.183307	0.0325497	0.0671362	0.0477586	0.0260867	2.81009e-13	3.33441e-13	0.0671413	1	0.395701
rs599136	10:112823415	A:0.0600067	rs2856614	16:19512116	T:0.338065	17998	6672	5	1	0.0671413	1.37447e-05	-0.232357	0.0534411	2.5806e-05	-0.113341	0.026937	1.3806e-05	-0.329665	0.0758386	4.9732e-06	-0.129436	0.0283482	0.0669217	0.137523	0.0750591	8.25617e-09	8.04275e-09	0.0671413	1	0.395701
rs599136	10:112823415	A:0.0600067	rs1134662	16:19510249	G:0.338065	17998	6672	5	1	0.0671413	1.37447e-05	-0.232357	0.0534411	2.5806e-05	-0.113341	0.026937	1.3806e-05	-0.329665	0.0758386	4.9732e-06	-0.129436	0.0283482	0.0669217	0.137523	0.0750591	8.25617e-09	8.04275e-09	0.0671413	1	0.395701
rs3761659	5:131657784	G:0.250277	rs12258200	10:114781698	T:0.449474	18060	6704	5	1	0.0673008	4.56321e-07	-0.180527	0.0357917	7.50225e-08	-0.138418	0.0257345	0.00618285	-0.126738	0.04629	0.000342483	-0.108805	0.0303853	0.067395	-0.0564379	0.0308567	1.01393e-12	1.18067e-12	0.0673008	1	0.395701
rs7896811	10:114766717	T:0.139243	rs57225583	10:114771843	G:0.1411	18044	6687	5	1	0.0673008	0.2843	-0.312602	0.291958	0.596068	0.153946	0.29043	0.124669	-0.46663	0.303901	0.631469	0.139397	0.290616	0.0658131	0.129498	0.0703911	3.77483e-05	2.86223e-05	0.0673008	1	0.395701
rs11196208	10:114811316	T:0.456494	rs11158715	14:68489386	T:0.303619	17825	6617	5	1	0.0673807	8.88622e-09	-0.148452	0.0258145	0.000155527	0.110192	0.0291353	1.4308e-08	-0.184732	0.0325826	0.212239	0.0532124	0.0426575	0.06742	0.0657287	0.0359396	6.69712e-11	7.24558e-11	0.0673807	1	0.395701
rs6585201	10:114768783	G:0.469274	rs11196208	10:114811316	T:0.456984	17819	6606	5	1	0.0673807	0.228897	-0.0713573	0.059306	0.180653	-0.0801418	0.0598632	0.762159	-0.0198347	0.0655374	0.923098	-0.0069393	0.0718859	0.0674682	-0.0641514	0.0350834	6.08863e-08	5.66185e-08	0.0673807	1	0.395701
rs10885409	10:114808072	T:0.456041	rs11158715	14:68489386	T:0.304074	17869	6638	5	1	0.0673807	1.51672e-08	-0.145829	0.0257663	0.000117074	0.112066	0.0290918	2.18634e-08	-0.182088	0.0325356	0.193989	0.0552693	0.0425519	0.0673868	0.0655924	0.0358607	8.83766e-11	9.51044e-11	0.0673807	1	0.395701
rs10787473	10:114781400	C:0.452294	rs1729752	13:95732362	G:0.298149	18048	6698	5	1	0.067621	1.953e-07	-0.133379	0.0256313	5.47998e-08	-0.168954	0.0310863	0.000813853	-0.102628	0.0306532	0.00185413	-0.123689	0.0397374	0.067831	-0.0546099	0.0299048	3.56619e-13	4.23996e-13	0.067621	1	0.395701
rs1875574	1:217403246	G:0.27425	rs1967952	16:19503828	T:0.338417	18000	6675	5	1	0.067621	3.02187e-05	-0.116082	0.0278254	1.25153e-05	-0.117564	0.0269122	1.52684e-05	-0.161349	0.037308	5.22759e-06	-0.156545	0.0343645	0.0674431	0.073379	0.0401261	1.17344e-08	1.14012e-08	0.067621	1	0.395701
rs1875574	1:217403246	G:0.27425	rs1475962	16:19503598	C:0.338417	18000	6675	5	1	0.067621	3.02187e-05	-0.116082	0.0278254	1.25153e-05	-0.117564	0.0269122	1.52684e-05	-0.161349	0.037308	5.22759e-06	-0.156545	0.0343645	0.0674431	0.073379	0.0401261	1.17344e-08	1.14012e-08	0.067621	1	0.395701
rs1824332	4:128668850	C:0.477615	rs117537110	6:30649931	G:0.446237	18070	6702	5	1	0.0677013	9.12703e-07	0.220707	0.0449544	8.67868e-07	0.605661	0.123116	1.26037e-05	0.201229	0.0460809	0.0139071	0.402932	0.163816	0.0660703	0.140375	0.0763758	1.82554e-11	2.03143e-11	0.0677013	1	0.395701
rs4132670	10:114767771	A:0.397554	rs4148427	13:95925674	T:0.252989	17985	6668	5	1	0.0677013	5.24728e-19	0.233248	0.0261873	8.16301e-06	-0.157303	0.035263	3.85026e-11	0.203622	0.0308064	3.35532e-06	-0.20634	0.0443955	0.0679391	0.0561448	0.0307574	2.42392e-22	3.73228e-22	0.0677013	1	0.395701
rs6585199	10:114765171	G:0.456693	rs7918599	10:114777396	C:0.449768	17907	6647	5	1	0.0677818	0.0506624	-0.246096	0.125924	0.418702	0.102028	0.126167	0.103267	-0.207793	0.127542	0.159263	0.189883	0.134902	0.0677567	-0.0649343	0.0355488	6.53215e-08	6.09209e-08	0.0677818	1	0.395701
rs7899529	10:114779538	G:0.452618	rs12265291	10:114810240	T:0.449897	18013	6679	5	1	0.0678623	0.353162	0.0731469	0.0787819	0.00573961	-0.218807	0.079212	0.12561	0.129181	0.0843412	0.0858124	-0.15021	0.0874377	0.067863	-0.0643848	0.0352617	3.33304e-08	3.16554e-08	0.0678623	1	0.395701
rs11196191	10:114780633	A:0.449226	rs11158715	14:68489386	T:0.306568	17952	6673	5	1	0.0681045	3.35055e-08	-0.142528	0.0258106	0.00013721	0.110438	0.0289625	3.89734e-08	-0.178337	0.0324517	0.188119	0.0551624	0.0419115	0.068069	0.0650324	0.035643	2.07701e-10	2.21682e-10	0.0681045	1	0.395701
rs6604661	1:217409199	T:0.274686	rs2972143	2:227116365	A:0.342069	17935	6635	5	1	0.0681045	4.01347e-05	-0.114427	0.0278635	1.765e-09	-0.156361	0.0259819	0.0959801	-0.0647688	0.0389081	0.000624984	-0.116276	0.0339935	0.0684216	-0.0737926	0.040496	2.22112e-12	2.57729e-12	0.0681045	1	0.395701
rs2972152	2:227066574	A:0.280441	rs10860059	12:97046476	G:0.259754	17838	6615	5	1	0.0681854	7.5544e-07	-0.137873	0.0278726	1.06464e-05	-0.1274	0.0289308	7.4455e-07	-0.180816	0.0365331	6.33083e-06	-0.173126	0.0383444	0.0679049	0.0777909	0.0426103	2.81684e-10	2.99089e-10	0.0681854	1	0.395701
rs3821757	3:10948564	G:0.484669	rs12265291	10:114810240	T:0.449758	18003	6649	5	1	0.0682664	5.05096e-06	-0.145682	0.0319292	8.56452e-09	-0.148747	0.0258378	0.00782489	-0.104248	0.0391978	0.00366654	-0.103763	0.0357126	0.0683105	-0.049602	0.0272097	1.51467e-12	1.77234e-12	0.0682664	1	0.395701
rs6997996	8:25891653	G:0.277523	rs12718338	10:114813047	C:0.457918	17858	6599	5	1	0.0683476	9.31198e-05	-0.109344	0.0279805	3.1147e-08	-0.142711	0.0257841	9.94608e-05	-0.170905	0.043913	4.24207e-08	-0.179378	0.0327304	0.0683081	0.0689991	0.0378498	6.18778e-11	6.78218e-11	0.0683476	1	0.395701
rs1532716	1:217402689	A:0.274891	rs599136	10:112823415	A:0.059845	17938	6652	5	1	0.0685102	3.37082e-05	-0.11558	0.0278718	3.06363e-05	-0.223318	0.0535704	6.56433e-06	-0.132558	0.0294093	1.54431e-05	-0.307748	0.0712005	0.0675782	0.152222	0.0832812	2.06751e-08	2.00228e-08	0.0685102	1	0.395701
rs74987670	10:112820864	G:0.0596621	rs1967951	16:19503773	T:0.337687	17993	6669	5	1	0.0685102	1.045e-05	-0.23644	0.0536432	2.33569e-05	-0.113933	0.0269338	1.14767e-05	-0.333167	0.075939	4.57366e-06	-0.129805	0.0283205	0.0682436	0.137682	0.0755084	5.84879e-09	5.8375e-09	0.0685102	1	0.395701
rs3821757	3:10948564	G:0.485455	rs6585202	10:114782803	T:0.46216	17944	6641	5	1	0.0685916	3.34206e-06	-0.148659	0.0319794	1.56525e-07	-0.133435	0.0254419	0.00792054	-0.105613	0.0397725	0.0130007	-0.0882471	0.0355298	0.0686483	-0.0494824	0.0271772	1.94517e-11	2.18497e-11	0.0685916	1	0.395701
rs3761659	5:131657784	G:0.250431	rs6585200	10:114768609	A:0.453595	17983	6674	5	1	0.0685916	5.28277e-07	-0.180091	0.0359052	1.14461e-08	-0.147392	0.0258229	0.00683128	-0.125992	0.0465783	0.000108713	-0.117906	0.0304646	0.0687227	-0.0562995	0.0309297	1.83751e-13	2.2333e-13	0.0685916	1	0.395701
rs1562692	3:34534267	G:0.121529	rs11196191	10:114780633	A:0.450106	18008	6689	5	1	0.0686732	7.94388e-05	0.216882	0.0549612	2.95204e-08	-0.142828	0.0257614	0.0482305	0.138193	0.0699593	5.84539e-09	-0.161558	0.0277538	0.0688374	0.0827295	0.0454687	9.01197e-11	9.84403e-11	0.0686732	1	0.395701
rs1555944	14:68625118	G:0.322082	rs62026181	16:19506239	T:0.335946	17924	6666	5	1	0.0686732	0.000166614	0.114639	0.0304494	1.28964e-05	-0.117513	0.0269411	4.36138e-05	0.158056	0.0386686	0.0397594	-0.0739866	0.0359815	0.0688012	-0.0619037	0.0340182	6.50668e-08	6.13278e-08	0.0686732	1	0.395701
rs1875574	1:217403246	G:0.274293	rs2856610	16:19507031	T:0.338352	17999	6676	5	1	0.0688366	3.40796e-05	-0.115299	0.0278209	1.28316e-05	-0.11742	0.0269129	1.71325e-05	-0.160336	0.0372933	5.46186e-06	-0.156227	0.0343642	0.068665	0.0730456	0.0401213	1.35326e-08	1.32921e-08	0.0688366	1	0.395701
rs1875574	1:217403246	G:0.274293	rs2856609	16:19506773	G:0.338352	17999	6676	5	1	0.0688366	3.40796e-05	-0.115299	0.0278209	1.28316e-05	-0.11742	0.0269129	1.71325e-05	-0.160336	0.0372933	5.46186e-06	-0.156227	0.0343642	0.068665	0.0730456	0.0401213	1.35326e-08	1.32921e-08	0.0688366	1	0.395701
rs1875574	1:217403246	G:0.27429	rs2353696	16:19505813	T:0.338453	18001	6677	5	1	0.0689184	3.20359e-05	-0.11569	0.0278202	1.11545e-05	-0.118249	0.0269146	1.63657e-05	-0.160725	0.0372959	4.88328e-06	-0.157058	0.0343691	0.0687266	0.073028	0.0401206	1.11643e-08	1.10271e-08	0.0689184	1	0.395701
rs10885405	10:114777670	C:0.461319	rs11158715	14:68489386	T:0.306038	17903	6647	5	1	0.0690004	1.09138e-07	-0.135308	0.0254779	9.66627e-05	0.11306	0.0289985	1.22051e-07	-0.171945	0.0325014	0.185677	0.056352	0.0425787	0.0689257	0.0645725	0.0355007	4.43585e-10	4.71115e-10	0.0690004	1	0.395701
rs1555944	14:68625118	G:0.322273	rs1967952	16:19503828	T:0.338808	17932	6666	5	1	0.0690825	0.000167109	0.114597	0.0304443	7.11031e-06	-0.120977	0.0269415	4.45485e-05	0.158222	0.0387559	0.0305343	-0.0776908	0.0359166	0.0691876	-0.0616605	0.0339317	3.63924e-08	3.49829e-08	0.0690825	1	0.395701
rs1555944	14:68625118	G:0.322273	rs1475962	16:19503598	C:0.338808	17932	6666	5	1	0.0690825	0.000167109	0.114597	0.0304443	7.11031e-06	-0.120977	0.0269415	4.45485e-05	0.158222	0.0387559	0.0305343	-0.0776908	0.0359166	0.0691876	-0.0616605	0.0339317	3.63924e-08	3.49829e-08	0.0690825	1	0.395701
rs7708975	5:132650567	T:0.0960687	rs10787472	10:114781297	A:0.452187	18060	6706	5	1	0.0690825	0.000259792	-0.156754	0.0429179	1.89472e-07	-0.133401	0.0256079	0.000130607	-0.239026	0.0624854	3.53356e-08	-0.151078	0.0274055	0.0687152	0.105599	0.0580123	1.30122e-09	1.35216e-09	0.0690825	1	0.395701
rs2308953	5:34909062	C:0.084387	rs849142	7:28185891	C:0.41241	17953	6658	5	1	0.0691647	2.15789e-09	0.749415	0.125206	5.20254e-06	-0.118513	0.02601	4.67044e-10	0.83993	0.134825	9.16207e-05	-0.105494	0.0269683	0.0690247	-0.0938074	0.0515919	6.95503e-13	8.33109e-13	0.0691647	1	0.395701
rs6604661	1:217409199	T:0.274814	rs599136	10:112823415	A:0.0598782	17903	6637	5	1	0.0691647	2.97299e-05	-0.116511	0.0279034	2.94093e-05	-0.223945	0.053601	5.81359e-06	-0.133442	0.0294375	1.5109e-05	-0.308205	0.0712269	0.0681549	0.152113	0.0833961	1.76498e-08	1.72906e-08	0.0691647	1	0.395701
rs3761659	5:131657784	G:0.249792	rs7904519	10:114773927	A:0.450092	18023	6683	5	1	0.0692469	3.83692e-07	-0.181715	0.0357927	9.90497e-08	-0.137146	0.0257384	0.00564963	-0.128206	0.0463265	0.000388397	-0.10778	0.0303789	0.0693709	-0.0561314	0.0309094	1.13002e-12	1.34411e-12	0.0692469	1	0.395701
rs1502364	1:217392174	G:0.274715	rs2972143	2:227116365	A:0.342337	17975	6648	5	1	0.0693293	2.97353e-05	-0.116231	0.0278364	7.03341e-10	-0.160074	0.0259636	0.0857814	-0.0668081	0.0388853	0.00040169	-0.120207	0.0339666	0.0696804	-0.0733526	0.0404374	6.66902e-13	8.00934e-13	0.0693293	1	0.395701
rs3761659	5:131657784	G:0.250445	rs6585199	10:114765171	G:0.456398	17958	6664	5	1	0.0693293	4.09867e-07	-0.182268	0.0359907	1.66811e-08	-0.145249	0.0257383	0.00605282	-0.128168	0.0466932	0.000134886	-0.115926	0.0303681	0.0694476	-0.0561703	0.0309394	2.06799e-13	2.53057e-13	0.0693293	1	0.395701
rs1502364	1:217392174	G:0.274147	rs1967952	16:19503828	T:0.338779	18025	6682	5	1	0.0693293	2.14131e-05	-0.118196	0.0278133	1.43679e-05	-0.116699	0.0269006	1.2164e-05	-0.163203	0.0373068	6.01804e-06	-0.155361	0.0343282	0.0691608	0.0729046	0.0401155	9.66187e-09	9.62179e-09	0.0693293	1	0.395701
rs1502364	1:217392174	G:0.274147	rs1475962	16:19503598	C:0.338779	18025	6682	5	1	0.0693293	2.14131e-05	-0.118196	0.0278133	1.43679e-05	-0.116699	0.0269006	1.2164e-05	-0.163203	0.0373068	6.01804e-06	-0.155361	0.0343282	0.0691608	0.0729046	0.0401155	9.66187e-09	9.62179e-09	0.0693293	1	0.395701
rs599136	10:112823415	A:0.0600545	rs1967951	16:19503773	T:0.337678	17992	6670	5	1	0.0693293	1.32521e-05	-0.232786	0.0534415	2.33978e-05	-0.113956	0.0269417	1.39716e-05	-0.329181	0.0757731	4.59984e-06	-0.129899	0.0283483	0.0690759	0.136535	0.075105	7.35037e-09	7.36719e-09	0.0693293	1	0.395701
rs1875574	1:217403246	G:0.274251	rs1967951	16:19503773	T:0.33804	17989	6671	5	1	0.0693293	3.1129e-05	-0.115963	0.0278419	1.78508e-05	-0.11551	0.026924	1.6128e-05	-0.160946	0.0373192	7.21965e-06	-0.154271	0.0343809	0.0691627	0.0730189	0.0401787	1.70235e-08	1.67236e-08	0.0693293	1	0.395701
rs599136	10:112823415	A:0.0601966	rs11158715	14:68489386	T:0.305031	17908	6647	5	1	0.0694118	1.27995e-05	-0.233347	0.053477	0.000203808	0.107852	0.0290373	0.0459801	-0.144139	0.0722294	4.61686e-05	0.123261	0.0302538	0.0700573	-0.138944	0.0766997	6.31265e-08	6.00579e-08	0.0694118	1	0.395701
rs6573817	14:68617269	G:0.318916	rs2856610	16:19507031	T:0.338377	18011	6683	5	1	0.0695771	0.000139895	0.116167	0.0305032	1.40125e-05	-0.116854	0.0269021	3.84414e-05	0.159703	0.0387945	0.0380353	-0.0740978	0.0357188	0.0696219	-0.0615146	0.0339043	5.85538e-08	5.59227e-08	0.0695771	1	0.395701
rs1532716	1:217402689	A:0.274208	rs1967952	16:19503828	T:0.338799	18021	6684	5	1	0.0695771	3.58001e-05	-0.114925	0.0278065	1.53323e-05	-0.116278	0.0268921	1.81806e-05	-0.159902	0.0373067	6.4081e-06	-0.154945	0.0343372	0.06945	0.0728028	0.0401011	1.67759e-08	1.65335e-08	0.0695771	1	0.395701
rs1532716	1:217402689	A:0.274208	rs1475962	16:19503598	C:0.338799	18021	6684	5	1	0.0695771	3.58001e-05	-0.114925	0.0278065	1.53323e-05	-0.116278	0.0268921	1.81806e-05	-0.159902	0.0373067	6.4081e-06	-0.154945	0.0343372	0.06945	0.0728028	0.0401011	1.67759e-08	1.65335e-08	0.0695771	1	0.395701
rs7821832	8:25889446	G:0.302757	rs2521793	16:19511391	C:0.340861	17846	6589	5	1	0.0695771	0.00025578	-0.101063	0.02764	3.56162e-05	-0.111645	0.0270051	0.161938	-0.0533173	0.0381224	0.0517406	-0.0693507	0.0356506	0.0696895	-0.0681542	0.0375728	2.06984e-07	1.91098e-07	0.0695771	1	0.395701
rs6573817	14:68617269	G:0.318916	rs2856609	16:19506773	G:0.338377	18011	6683	5	1	0.0695771	0.000139895	0.116167	0.0305032	1.40125e-05	-0.116854	0.0269021	3.84414e-05	0.159703	0.0387945	0.0380353	-0.0740978	0.0357188	0.0696219	-0.0615146	0.0339043	5.85538e-08	5.59227e-08	0.0695771	1	0.395701
rs7821832	8:25889446	G:0.301959	rs6573817	14:68617269	G:0.31806	17918	6619	5	1	0.0696599	0.000404436	-0.0976062	0.0275944	0.00015399	0.11595	0.0306378	0.15194	-0.0529226	0.0369388	3.58644e-05	0.155865	0.0377156	0.069746	-0.0649077	0.0357903	1.3069e-06	1.14429e-06	0.0696599	1	0.395701
rs1555944	14:68625118	G:0.322255	rs2245423	16:19505730	T:0.338789	17933	6668	5	1	0.069909	0.00017289	0.114336	0.0304436	6.89148e-06	-0.121154	0.0269411	4.64484e-05	0.15784	0.0387546	0.0298934	-0.0779891	0.0359149	0.0699422	-0.0614907	0.03393	3.64635e-08	3.53848e-08	0.069909	1	0.395701
rs1555944	14:68625118	G:0.322255	rs4421962	16:19505852	C:0.338789	17933	6668	5	1	0.069909	0.00017289	0.114336	0.0304436	6.89148e-06	-0.121154	0.0269411	4.64484e-05	0.15784	0.0387546	0.0298934	-0.0779891	0.0359149	0.0699422	-0.0614907	0.03393	3.64635e-08	3.53848e-08	0.069909	1	0.395701
rs1555944	14:68625118	G:0.322255	rs1475963	16:19505282	G:0.338789	17933	6668	5	1	0.069909	0.00017289	0.114336	0.0304436	6.89148e-06	-0.121154	0.0269411	4.64484e-05	0.15784	0.0387546	0.0298934	-0.0779891	0.0359149	0.0699422	-0.0614907	0.03393	3.64635e-08	3.53848e-08	0.069909	1	0.395701
rs1555944	14:68625118	G:0.322255	rs1475964	16:19505406	T:0.338789	17933	6668	5	1	0.069909	0.00017289	0.114336	0.0304436	6.89148e-06	-0.121154	0.0269411	4.64484e-05	0.15784	0.0387546	0.0298934	-0.0779891	0.0359149	0.0699422	-0.0614907	0.03393	3.64635e-08	3.53848e-08	0.069909	1	0.395701
rs1555944	14:68625118	G:0.321664	rs2856611	16:19507199	G:0.338582	17910	6659	5	1	0.0700755	0.000185202	0.113868	0.030459	7.42813e-06	-0.120829	0.0269646	4.9549e-05	0.157429	0.0387971	0.0305036	-0.0777208	0.0359238	0.0701537	-0.0615096	0.033966	4.21335e-08	4.08147e-08	0.0700755	1	0.395701
rs1000796	1:217402330	A:0.274901	rs599136	10:112823415	A:0.0598908	17941	6652	5	1	0.0703262	3.37335e-05	-0.115588	0.0278749	2.89678e-05	-0.223974	0.0535639	6.6808e-06	-0.132468	0.0294136	1.53118e-05	-0.307906	0.071206	0.069334	0.151271	0.0832881	1.94794e-08	1.92926e-08	0.0703262	1	0.395701
rs1502364	1:217392174	G:0.27419	rs2856609	16:19506773	G:0.338715	18024	6683	5	1	0.0705778	2.41966e-05	-0.117413	0.0278088	1.47262e-05	-0.116556	0.0269013	1.36671e-05	-0.162189	0.0372921	6.28675e-06	-0.155042	0.0343279	0.0704215	0.0725679	0.0401107	1.11534e-08	1.12286e-08	0.0705778	1	0.395701
rs1502364	1:217392174	G:0.27419	rs2856610	16:19507031	T:0.338715	18024	6683	5	1	0.0705778	2.41966e-05	-0.117413	0.0278088	1.47262e-05	-0.116556	0.0269013	1.36671e-05	-0.162189	0.0372921	6.28675e-06	-0.155042	0.0343279	0.0704215	0.0725679	0.0401107	1.11534e-08	1.12286e-08	0.0705778	1	0.395701
rs1502364	1:217392174	G:0.274187	rs2353696	16:19505813	T:0.338816	18026	6684	5	1	0.0706619	2.27255e-05	-0.117803	0.0278081	1.28126e-05	-0.117385	0.026903	1.30504e-05	-0.162577	0.0372947	5.62364e-06	-0.155873	0.0343328	0.0704803	0.0725513	0.04011	9.21043e-09	9.32377e-09	0.0706619	1	0.395701
rs1875574	1:217403246	G:0.274791	rs2972143	2:227116365	A:0.342173	17950	6641	5	1	0.0706619	3.96856e-05	-0.11444	0.0278491	9.31074e-10	-0.158961	0.0259707	0.093441	-0.0652441	0.0388932	0.000447605	-0.119265	0.0339756	0.0709531	-0.0731096	0.0404865	1.17503e-12	1.41974e-12	0.0706619	1	0.395701
rs10885405	10:114777670	C:0.461999	rs8011527	14:68638685	A:0.320165	17947	6650	5	1	0.0707461	1.6752e-07	-0.133138	0.025446	0.000150324	0.115847	0.0305621	1.66215e-07	-0.169011	0.0322932	0.163087	0.0603929	0.0432997	0.0706917	0.0623029	0.03447	1.02334e-09	1.08954e-09	0.0707461	1	0.395701
rs74987670	10:112820864	G:0.0596501	rs2353696	16:19505813	T:0.338101	18005	6675	5	1	0.0707461	9.28239e-06	-0.237723	0.0536228	1.47344e-05	-0.116653	0.0269244	1.10425e-05	-0.333684	0.0759117	2.91414e-06	-0.13242	0.0283144	0.070394	0.136493	0.0754368	3.32279e-09	3.44722e-09	0.0707461	1	0.395701
rs1532716	1:217402689	A:0.274251	rs2856609	16:19506773	G:0.338735	18020	6685	5	1	0.0708304	4.03272e-05	-0.114144	0.027802	1.57168e-05	-0.116134	0.0268928	2.03814e-05	-0.158889	0.037292	6.69397e-06	-0.154626	0.034337	0.0707096	0.0724677	0.0400963	1.9309e-08	1.92375e-08	0.0708304	1	0.395701
rs1532716	1:217402689	A:0.274251	rs2856610	16:19507031	T:0.338735	18020	6685	5	1	0.0708304	4.03272e-05	-0.114144	0.027802	1.57168e-05	-0.116134	0.0268928	2.03814e-05	-0.158889	0.037292	6.69397e-06	-0.154626	0.034337	0.0707096	0.0724677	0.0400963	1.9309e-08	1.92375e-08	0.0708304	1	0.395701
rs1532716	1:217402689	A:0.274248	rs2353696	16:19505813	T:0.338836	18022	6686	5	1	0.0709148	3.79299e-05	-0.114534	0.0278013	1.3682e-05	-0.116962	0.0268945	1.94776e-05	-0.159278	0.0372946	5.99123e-06	-0.155455	0.0343419	0.0707731	0.0724499	0.0400956	1.59609e-08	1.59912e-08	0.0709148	1	0.395701
rs1502364	1:217392174	G:0.274148	rs1967951	16:19503773	T:0.338403	18014	6678	5	1	0.0710839	2.20718e-05	-0.118077	0.0278298	2.04554e-05	-0.114643	0.0269124	1.2855e-05	-0.162802	0.037318	8.29832e-06	-0.153086	0.0343446	0.0709106	0.0725454	0.040168	1.39895e-08	1.40877e-08	0.0710839	1	0.395701
rs1875574	1:217403246	G:0.27429	rs4421962	16:19505852	C:0.338398	18001	6677	5	1	0.0711686	3.21545e-05	-0.115666	0.02782	1.21255e-05	-0.117748	0.0269118	1.71422e-05	-0.160328	0.0372926	5.4562e-06	-0.156234	0.0343641	0.0710067	0.0724319	0.0401188	1.20951e-08	1.22344e-08	0.0711686	1	0.395701
rs1875574	1:217403246	G:0.27429	rs2245423	16:19505730	T:0.338398	18001	6677	5	1	0.0711686	3.21545e-05	-0.115666	0.02782	1.21255e-05	-0.117748	0.0269118	1.71422e-05	-0.160328	0.0372926	5.4562e-06	-0.156234	0.0343641	0.0710067	0.0724319	0.0401188	1.20951e-08	1.22344e-08	0.0711686	1	0.395701
rs1875574	1:217403246	G:0.27429	rs1475964	16:19505406	T:0.338398	18001	6677	5	1	0.0711686	3.21545e-05	-0.115666	0.02782	1.21255e-05	-0.117748	0.0269118	1.71422e-05	-0.160328	0.0372926	5.4562e-06	-0.156234	0.0343641	0.0710067	0.0724319	0.0401188	1.20951e-08	1.22344e-08	0.0711686	1	0.395701
rs1875574	1:217403246	G:0.27429	rs1475963	16:19505282	G:0.338398	18001	6677	5	1	0.0711686	3.21545e-05	-0.115666	0.02782	1.21255e-05	-0.117748	0.0269118	1.71422e-05	-0.160328	0.0372926	5.4562e-06	-0.156234	0.0343641	0.0710067	0.0724319	0.0401188	1.20951e-08	1.22344e-08	0.0711686	1	0.395701
rs1532716	1:217402689	A:0.274209	rs1967951	16:19503773	T:0.338423	18010	6680	5	1	0.0713384	3.68688e-05	-0.114805	0.027823	2.18005e-05	-0.114223	0.0269039	1.92001e-05	-0.159496	0.0373178	8.82846e-06	-0.152669	0.0343537	0.0712223	0.0724393	0.0401535	2.42426e-08	2.41552e-08	0.0713384	1	0.395701
rs10787472	10:114781297	A:0.452204	rs1729752	13:95732362	G:0.29835	18056	6703	5	1	0.0714235	2.11339e-07	-0.132976	0.0256262	4.86749e-08	-0.169562	0.0310776	0.000814598	-0.10262	0.0306531	0.00165855	-0.124932	0.0397188	0.0715558	-0.0538553	0.0298875	3.44299e-13	4.2809e-13	0.0714235	1	0.395701
rs2972143	2:227116365	A:0.342327	rs17866193	4:118392862	C:0.442811	17958	6636	5	1	0.0714235	3.69197e-09	-0.153146	0.0259683	5.13751e-06	0.11623	0.0254942	0.0222124	-0.094776	0.0414464	5.15002e-06	0.159303	0.0349457	0.0714524	-0.0646832	0.0358835	7.52018e-13	9.23295e-13	0.0714235	1	0.395701
rs599136	10:112823415	A:0.0600422	rs2353696	16:19505813	T:0.338092	18004	6676	5	1	0.0714235	1.17848e-05	-0.234066	0.0534211	1.47469e-05	-0.116683	0.0269324	1.34134e-05	-0.329743	0.0757463	2.92599e-06	-0.132527	0.0283422	0.0711111	0.135419	0.0750343	4.17586e-09	4.34284e-09	0.0714235	1	0.395701
rs1604525	1:217377592	T:0.273794	rs62026181	16:19506239	T:0.33558	18030	6694	5	1	0.0714235	2.4794e-05	-0.117234	0.0278025	2.74849e-05	-0.112639	0.0268613	1.42348e-05	-0.161944	0.0373124	1.06482e-05	-0.150977	0.034285	0.0712749	0.0726571	0.0402817	2.05744e-08	2.06032e-08	0.0714235	1	0.395701
rs74987670	10:112820864	G:0.0596501	rs2245423	16:19505730	T:0.338045	18005	6675	5	1	0.0715939	9.29321e-06	-0.237709	0.0536226	1.5974e-05	-0.116162	0.0269216	1.12608e-05	-0.333353	0.07591	3.19281e-06	-0.131874	0.0283112	0.0713242	0.136041	0.0754358	3.59279e-09	3.75643e-09	0.0715939	1	0.395701
rs74987670	10:112820864	G:0.0596501	rs1475964	16:19505406	T:0.338045	18005	6675	5	1	0.0715939	9.29321e-06	-0.237709	0.0536226	1.5974e-05	-0.116162	0.0269216	1.12608e-05	-0.333353	0.07591	3.19281e-06	-0.131874	0.0283112	0.0713242	0.136041	0.0754358	3.59279e-09	3.75643e-09	0.0715939	1	0.395701
rs74987670	10:112820864	G:0.0596501	rs1475963	16:19505282	G:0.338045	18005	6675	5	1	0.0715939	9.29321e-06	-0.237709	0.0536226	1.5974e-05	-0.116162	0.0269216	1.12608e-05	-0.333353	0.07591	3.19281e-06	-0.131874	0.0283112	0.0713242	0.136041	0.0754358	3.59279e-09	3.75643e-09	0.0715939	1	0.395701
rs74987670	10:112820864	G:0.0596501	rs4421962	16:19505852	C:0.338045	18005	6675	5	1	0.0715939	9.29321e-06	-0.237709	0.0536226	1.5974e-05	-0.116162	0.0269216	1.12608e-05	-0.333353	0.07591	3.19281e-06	-0.131874	0.0283112	0.0713242	0.136041	0.0754358	3.59279e-09	3.75643e-09	0.0715939	1	0.395701
rs905293	1:217405444	T:0.274235	rs1475962	16:19503598	C:0.33837	18001	6673	5	1	0.0716793	2.61341e-05	-0.117016	0.0278294	1.21052e-05	-0.117771	0.0269148	1.47724e-05	-0.161631	0.0373104	5.4954e-06	-0.156188	0.0343654	0.0714924	0.0723356	0.0401343	9.891e-09	1.01108e-08	0.0716793	1	0.395701
rs905293	1:217405444	T:0.274235	rs1967952	16:19503828	T:0.33837	18001	6673	5	1	0.0716793	2.61341e-05	-0.117016	0.0278294	1.21052e-05	-0.117771	0.0269148	1.47724e-05	-0.161631	0.0373104	5.4954e-06	-0.156188	0.0343654	0.0714924	0.0723356	0.0401343	9.891e-09	1.01108e-08	0.0716793	1	0.395701
rs1000796	1:217402330	A:0.274218	rs1967952	16:19503828	T:0.338854	18024	6684	5	1	0.0717648	3.57291e-05	-0.11495	0.0278094	1.50782e-05	-0.116378	0.0268924	1.89477e-05	-0.159597	0.0373157	6.58903e-06	-0.15475	0.034339	0.0716427	0.0722449	0.0401052	1.64354e-08	1.66124e-08	0.0717648	1	0.395701
rs1000796	1:217402330	A:0.274218	rs1475962	16:19503598	C:0.338854	18024	6684	5	1	0.0717648	3.57291e-05	-0.11495	0.0278094	1.50782e-05	-0.116378	0.0268924	1.89477e-05	-0.159597	0.0373157	6.58903e-06	-0.15475	0.034339	0.0716427	0.0722449	0.0401052	1.64354e-08	1.66124e-08	0.0717648	1	0.395701
rs74987670	10:112820864	G:0.0596534	rs1475962	16:19503598	C:0.338064	18004	6673	5	1	0.0717648	9.58637e-06	-0.237346	0.0536218	1.64458e-05	-0.11599	0.026922	1.15397e-05	-0.332944	0.0759087	3.29314e-06	-0.131695	0.0283116	0.0714595	0.135975	0.075435	3.8096e-09	3.98541e-09	0.0717648	1	0.395701
rs74987670	10:112820864	G:0.0596534	rs1967952	16:19503828	T:0.338064	18004	6673	5	1	0.0717648	9.58637e-06	-0.237346	0.0536218	1.64458e-05	-0.11599	0.026922	1.15397e-05	-0.332944	0.0759087	3.29314e-06	-0.131695	0.0283116	0.0714595	0.135975	0.075435	3.8096e-09	3.98541e-09	0.0717648	1	0.395701
rs11158715	14:68489386	T:0.306153	rs2521791	16:19508824	C:0.339114	17991	6683	5	1	0.0718504	0.000200892	0.107607	0.028943	1.96898e-05	-0.114894	0.0269175	6.72563e-05	0.153092	0.0384094	0.0400681	-0.0729891	0.0355516	0.0719487	-0.0639092	0.0355161	1.09286e-07	1.05341e-07	0.0718504	1	0.395701
rs6604661	1:217409199	T:0.274359	rs2856608	16:19505751	G:0.334789	17971	6662	5	1	0.0720219	3.83069e-05	-0.114642	0.027843	9.63907e-06	-0.119159	0.0269278	1.96718e-05	-0.159047	0.0372599	4.63076e-06	-0.157642	0.0344133	0.0717896	0.0725548	0.0402982	1.12518e-08	1.15104e-08	0.0720219	1	0.395701
rs11158715	14:68489386	T:0.306114	rs2187660	16:19508583	C:0.339105	17990	6683	5	1	0.0721078	0.00019688	0.107756	0.0289435	1.96301e-05	-0.11491	0.026917	6.64256e-05	0.153204	0.0384091	0.0399363	-0.0730372	0.0355515	0.072169	-0.063858	0.0355151	1.06859e-07	1.03357e-07	0.0721078	1	0.395701
rs11158715	14:68489386	T:0.306114	rs2187659	16:19508573	A:0.339105	17990	6683	5	1	0.0721078	0.00019688	0.107756	0.0289435	1.96301e-05	-0.11491	0.026917	6.64256e-05	0.153204	0.0384091	0.0399363	-0.0730372	0.0355515	0.072169	-0.063858	0.0355151	1.06859e-07	1.03357e-07	0.0721078	1	0.395701
rs74987670	10:112820864	G:0.0596567	rs2856609	16:19506773	G:0.337999	18003	6674	5	1	0.0723663	9.2985e-06	-0.237704	0.053623	1.69391e-05	-0.115818	0.0269229	1.14227e-05	-0.333118	0.07591	3.41161e-06	-0.131494	0.0283128	0.0720162	0.135711	0.0754364	3.79845e-09	4.00066e-09	0.0723663	1	0.395701
rs599136	10:112823415	A:0.0600422	rs4421962	16:19505852	C:0.338036	18004	6676	5	1	0.0723663	1.17984e-05	-0.234052	0.0534209	1.59908e-05	-0.11619	0.0269296	1.36789e-05	-0.32941	0.0757446	3.20664e-06	-0.131978	0.0283389	0.0720569	0.134967	0.0750333	4.51518e-09	4.7368e-09	0.0723663	1	0.395701
rs599136	10:112823415	A:0.0600422	rs1475963	16:19505282	G:0.338036	18004	6676	5	1	0.0723663	1.17984e-05	-0.234052	0.0534209	1.59908e-05	-0.11619	0.0269296	1.36789e-05	-0.32941	0.0757446	3.20664e-06	-0.131978	0.0283389	0.0720569	0.134967	0.0750333	4.51518e-09	4.7368e-09	0.0723663	1	0.395701
rs599136	10:112823415	A:0.0600422	rs1475964	16:19505406	T:0.338036	18004	6676	5	1	0.0723663	1.17984e-05	-0.234052	0.0534209	1.59908e-05	-0.11619	0.0269296	1.36789e-05	-0.32941	0.0757446	3.20664e-06	-0.131978	0.0283389	0.0720569	0.134967	0.0750333	4.51518e-09	4.7368e-09	0.0723663	1	0.395701
rs599136	10:112823415	A:0.0600422	rs2245423	16:19505730	T:0.338036	18004	6676	5	1	0.0723663	1.17984e-05	-0.234052	0.0534209	1.59908e-05	-0.11619	0.0269296	1.36789e-05	-0.32941	0.0757446	3.20664e-06	-0.131978	0.0283389	0.0720569	0.134967	0.0750333	4.51518e-09	4.7368e-09	0.0723663	1	0.395701
rs6677242	1:217398785	A:0.276542	rs599136	10:112823415	A:0.0599597	17887	6633	5	1	0.0723663	2.61795e-05	-0.117141	0.0278615	4.15293e-05	-0.219685	0.0535973	5.25162e-06	-0.133923	0.0294046	2.11233e-05	-0.303218	0.0713004	0.071348	0.1501	0.0832385	2.20947e-08	2.23193e-08	0.0723663	1	0.395701
rs1562692	3:34534267	G:0.121679	rs7918599	10:114777396	C:0.450261	17994	6679	5	1	0.0723663	7.95338e-05	0.216875	0.0549634	4.56936e-08	-0.140808	0.0257545	0.0466381	0.139205	0.0699674	9.41433e-09	-0.15927	0.0277428	0.0725805	0.0816265	0.0454627	1.38765e-10	1.56768e-10	0.0723663	1	0.395701
rs74987670	10:112820864	G:0.0596567	rs2856610	16:19507031	T:0.337999	18003	6674	5	1	0.0723663	9.2985e-06	-0.237704	0.053623	1.69391e-05	-0.115818	0.0269229	1.14227e-05	-0.333118	0.07591	3.41161e-06	-0.131494	0.0283128	0.0720162	0.135711	0.0754364	3.79845e-09	4.00066e-09	0.0723663	1	0.395701
rs599136	10:112823415	A:0.0600455	rs1475962	16:19503598	C:0.338055	18003	6674	5	1	0.0724526	1.21677e-05	-0.23369	0.0534201	1.64639e-05	-0.116018	0.0269299	1.4016e-05	-0.328999	0.0757433	3.30765e-06	-0.131799	0.0283394	0.0721966	0.134899	0.0750325	4.79233e-09	5.02547e-09	0.0724526	1	0.395701
rs599136	10:112823415	A:0.0600455	rs1967952	16:19503828	T:0.338055	18003	6674	5	1	0.0724526	1.21677e-05	-0.23369	0.0534201	1.64639e-05	-0.116018	0.0269299	1.4016e-05	-0.328999	0.0757433	3.30765e-06	-0.131799	0.0283394	0.0721966	0.134899	0.0750325	4.79233e-09	5.02547e-09	0.0724526	1	0.395701
rs10885405	10:114777670	C:0.461528	rs1555944	14:68625118	G:0.322209	17844	6634	5	1	0.0726257	3.47795e-07	-0.129883	0.0254897	0.000138572	0.116183	0.0304885	3.20786e-07	-0.165903	0.0324612	0.159106	0.0609702	0.0433001	0.0726186	0.0620635	0.0345715	1.88037e-09	2.01767e-09	0.0726257	1	0.395701
rs6585201	10:114768783	G:0.466486	rs7899529	10:114779538	G:0.452741	17933	6649	5	1	0.0727992	0.0123966	-0.249126	0.0996247	0.272582	0.11018	0.100425	0.029685	-0.219407	0.100911	0.0707248	0.204831	0.113339	0.0728312	-0.0638122	0.035572	6.80564e-08	6.71268e-08	0.0727992	1	0.395701
rs1502364	1:217392174	G:0.274187	rs4421962	16:19505852	C:0.338761	18026	6684	5	1	0.0729732	2.28106e-05	-0.117778	0.0278078	1.39218e-05	-0.116883	0.0269001	1.36755e-05	-0.16218	0.0372914	6.27943e-06	-0.15505	0.0343278	0.0728055	0.0719561	0.0401082	9.97832e-09	1.03448e-08	0.0729732	1	0.395701
rs905293	1:217405444	T:0.274278	rs2856609	16:19506773	G:0.338306	18000	6674	5	1	0.0729732	2.95014e-05	-0.116232	0.0278248	1.24112e-05	-0.117627	0.0269155	1.65796e-05	-0.160617	0.0372957	5.74107e-06	-0.15587	0.0343651	0.0727752	0.072002	0.0401296	1.14067e-08	1.1788e-08	0.0729732	1	0.395701
rs905293	1:217405444	T:0.274278	rs2856610	16:19507031	T:0.338306	18000	6674	5	1	0.0729732	2.95014e-05	-0.116232	0.0278248	1.24112e-05	-0.117627	0.0269155	1.65796e-05	-0.160617	0.0372957	5.74107e-06	-0.15587	0.0343651	0.0727752	0.072002	0.0401296	1.14067e-08	1.1788e-08	0.0729732	1	0.395701
rs1502364	1:217392174	G:0.274187	rs1475964	16:19505406	T:0.338761	18026	6684	5	1	0.0729732	2.28106e-05	-0.117778	0.0278078	1.39218e-05	-0.116883	0.0269001	1.36755e-05	-0.16218	0.0372914	6.27943e-06	-0.15505	0.0343278	0.0728055	0.0719561	0.0401082	9.97832e-09	1.03448e-08	0.0729732	1	0.395701
rs1604525	1:217377592	T:0.274213	rs2074172	16:19529042	A:0.339681	17986	6674	5	1	0.0729732	2.792e-05	-0.116537	0.0278144	2.00655e-05	-0.114808	0.0269239	1.63334e-05	-0.161246	0.037413	8.47488e-06	-0.153027	0.0343662	0.072861	0.0719777	0.0401281	1.6924e-08	1.73236e-08	0.0729732	1	0.395701
rs1502364	1:217392174	G:0.274187	rs2245423	16:19505730	T:0.338761	18026	6684	5	1	0.0729732	2.28106e-05	-0.117778	0.0278078	1.39218e-05	-0.116883	0.0269001	1.36755e-05	-0.16218	0.0372914	6.27943e-06	-0.15505	0.0343278	0.0728055	0.0719561	0.0401082	9.97832e-09	1.03448e-08	0.0729732	1	0.395701
rs1502364	1:217392174	G:0.274187	rs1475963	16:19505282	G:0.338761	18026	6684	5	1	0.0729732	2.28106e-05	-0.117778	0.0278078	1.39218e-05	-0.116883	0.0269001	1.36755e-05	-0.16218	0.0372914	6.27943e-06	-0.15505	0.0343278	0.0728055	0.0719561	0.0401082	9.97832e-09	1.03448e-08	0.0729732	1	0.395701
rs905293	1:217405444	T:0.274776	rs2972143	2:227116365	A:0.342126	17951	6639	5	1	0.0729732	3.42006e-05	-0.115408	0.0278525	1.08809e-09	-0.158316	0.0259708	0.0865464	-0.0666451	0.038885	0.000463283	-0.11895	0.0339747	0.0733087	-0.0725031	0.0404841	1.19237e-12	1.47818e-12	0.0729732	1	0.395701
rs7708975	5:132650567	T:0.0960835	rs10787473	10:114781400	C:0.452277	18052	6701	5	1	0.0729732	0.000293171	-0.155421	0.042919	1.7416e-07	-0.133827	0.0256129	0.000153219	-0.236587	0.0624934	3.41896e-08	-0.15126	0.0274097	0.0726073	0.104158	0.0580171	1.34253e-09	1.45677e-09	0.0729732	1	0.395701
rs599136	10:112823415	A:0.0600489	rs2856609	16:19506773	G:0.33799	18002	6675	5	1	0.0730603	1.18047e-05	-0.234048	0.0534213	1.69565e-05	-0.115846	0.0269309	1.38764e-05	-0.329172	0.0757447	3.4266e-06	-0.131598	0.0283406	0.0727643	0.134634	0.075034	4.77831e-09	5.04469e-09	0.0730603	1	0.395701
rs74987670	10:112820864	G:0.0596675	rs2856611	16:19507199	G:0.337847	17983	6666	5	1	0.0730603	1.16742e-05	-0.235095	0.0536309	1.74642e-05	-0.115729	0.0269446	1.35421e-05	-0.330224	0.0758935	3.54207e-06	-0.131385	0.0283365	0.0727199	0.135367	0.0754306	4.88685e-09	5.15661e-09	0.0730603	1	0.395701
rs1555944	14:68625118	G:0.322179	rs2856610	16:19507031	T:0.338743	17931	6667	5	1	0.0730603	0.000172956	0.11434	0.0304454	7.3278e-06	-0.120808	0.0269423	4.90303e-05	0.15736	0.0387566	0.0296102	-0.0781262	0.0359157	0.0731259	-0.0608188	0.0339382	3.86262e-08	3.87702e-08	0.0730603	1	0.395701
rs1555944	14:68625118	G:0.322179	rs2856609	16:19506773	G:0.338743	17931	6667	5	1	0.0730603	0.000172956	0.11434	0.0304454	7.3278e-06	-0.120808	0.0269423	4.90303e-05	0.15736	0.0387566	0.0296102	-0.0781262	0.0359157	0.0731259	-0.0608188	0.0339382	3.86262e-08	3.87702e-08	0.0730603	1	0.395701
rs905293	1:217405444	T:0.274275	rs2353696	16:19505813	T:0.338407	18002	6675	5	1	0.0730603	2.77195e-05	-0.116623	0.0278241	1.07874e-05	-0.118456	0.0269172	1.58372e-05	-0.161006	0.0372983	5.13463e-06	-0.1567	0.0343701	0.0728418	0.0719839	0.0401288	9.41045e-09	9.779e-09	0.0730603	1	0.395701
rs599136	10:112823415	A:0.0600489	rs2856610	16:19507031	T:0.33799	18002	6675	5	1	0.0730603	1.18047e-05	-0.234048	0.0534213	1.69565e-05	-0.115846	0.0269309	1.38764e-05	-0.329172	0.0757447	3.4266e-06	-0.131598	0.0283406	0.0727643	0.134634	0.075034	4.77831e-09	5.04469e-09	0.0730603	1	0.395701
rs1000796	1:217402330	A:0.274261	rs2856609	16:19506773	G:0.338789	18023	6685	5	1	0.0731476	4.02457e-05	-0.114169	0.0278049	1.54557e-05	-0.116234	0.0268931	2.12365e-05	-0.158584	0.037301	6.88264e-06	-0.154431	0.0343387	0.0729376	0.071909	0.0401005	1.8917e-08	1.93478e-08	0.0731476	1	0.395701
rs1000796	1:217402330	A:0.274261	rs2856610	16:19507031	T:0.338789	18023	6685	5	1	0.0731476	4.02457e-05	-0.114169	0.0278049	1.54557e-05	-0.116234	0.0268931	2.12365e-05	-0.158584	0.037301	6.88264e-06	-0.154431	0.0343387	0.0729376	0.071909	0.0401005	1.8917e-08	1.93478e-08	0.0731476	1	0.395701
rs1532716	1:217402689	A:0.274248	rs4421962	16:19505852	C:0.33878	18022	6686	5	1	0.0732349	3.80674e-05	-0.11451	0.027801	1.48593e-05	-0.116461	0.0268916	2.03923e-05	-0.158881	0.0372912	6.68631e-06	-0.154634	0.0343368	0.0731034	0.0718555	0.0400938	1.72916e-08	1.77412e-08	0.0732349	1	0.395701
rs1532716	1:217402689	A:0.274248	rs2245423	16:19505730	T:0.33878	18022	6686	5	1	0.0732349	3.80674e-05	-0.11451	0.027801	1.48593e-05	-0.116461	0.0268916	2.03923e-05	-0.158881	0.0372912	6.68631e-06	-0.154634	0.0343368	0.0731034	0.0718555	0.0400938	1.72916e-08	1.77412e-08	0.0732349	1	0.395701
rs1532716	1:217402689	A:0.274248	rs1475964	16:19505406	T:0.33878	18022	6686	5	1	0.0732349	3.80674e-05	-0.11451	0.027801	1.48593e-05	-0.116461	0.0268916	2.03923e-05	-0.158881	0.0372912	6.68631e-06	-0.154634	0.0343368	0.0731034	0.0718555	0.0400938	1.72916e-08	1.77412e-08	0.0732349	1	0.395701
rs1000796	1:217402330	A:0.274258	rs2353696	16:19505813	T:0.33889	18025	6686	5	1	0.0732349	3.78547e-05	-0.114559	0.0278042	1.34539e-05	-0.117062	0.0268948	2.0297e-05	-0.158973	0.0373036	6.16104e-06	-0.15526	0.0343437	0.0730011	0.0718917	0.0400997	1.56369e-08	1.60829e-08	0.0732349	1	0.395701
rs1532716	1:217402689	A:0.274248	rs1475963	16:19505282	G:0.33878	18022	6686	5	1	0.0732349	3.80674e-05	-0.11451	0.027801	1.48593e-05	-0.116461	0.0268916	2.03923e-05	-0.158881	0.0372912	6.68631e-06	-0.154634	0.0343368	0.0731034	0.0718555	0.0400938	1.72916e-08	1.77412e-08	0.0732349	1	0.395701
rs905293	1:217405444	T:0.274236	rs1967951	16:19503773	T:0.337993	17990	6669	5	1	0.0734977	2.69252e-05	-0.116898	0.0278459	1.72719e-05	-0.115718	0.0269266	1.56046e-05	-0.161228	0.0373216	7.58371e-06	-0.153914	0.0343819	0.0732995	0.0719732	0.0401869	1.43492e-08	1.48316e-08	0.0734977	1	0.395701
rs6585200	10:114768609	A:0.45362	rs1729752	13:95732362	G:0.29827	17982	6673	5	1	0.0734977	1.21275e-08	-0.147144	0.0258242	8.1083e-08	-0.16707	0.0311424	0.000142042	-0.11712	0.0307839	0.00198537	-0.122872	0.0397335	0.0736512	-0.0535895	0.0299588	3.41569e-14	4.50367e-14	0.0734977	1	0.395701
rs6677242	1:217398785	A:0.275849	rs1967952	16:19503828	T:0.338509	17970	6665	5	1	0.0734977	2.78729e-05	-0.116473	0.0277966	1.11538e-05	-0.11835	0.0269374	1.6176e-05	-0.160834	0.0372989	5.40181e-06	-0.15673	0.0344571	0.0733617	0.0718641	0.0401347	9.85244e-09	1.0276e-08	0.0734977	1	0.395701
rs6677242	1:217398785	A:0.275849	rs1475962	16:19503598	C:0.338509	17970	6665	5	1	0.0734977	2.78729e-05	-0.116473	0.0277966	1.11538e-05	-0.11835	0.0269374	1.6176e-05	-0.160834	0.0372989	5.40181e-06	-0.15673	0.0344571	0.0733617	0.0718641	0.0401347	9.85244e-09	1.0276e-08	0.0734977	1	0.395701
rs10885405	10:114777670	C:0.461596	rs6585202	10:114782803	T:0.461707	18006	6679	5	1	0.0735855	0.51169	0.827067	1.26037	0.446149	-0.959951	1.26003	0.463488	0.925118	1.2619	0.457743	-0.935959	1.26044	0.0735835	-0.0627936	0.035096	7.81912e-07	7.26385e-07	0.0735855	1	0.395701
rs1000796	1:217402330	A:0.274219	rs1967951	16:19503773	T:0.338478	18013	6680	5	1	0.0735855	3.67982e-05	-0.11483	0.0278259	2.1446e-05	-0.114323	0.0269042	2.0009e-05	-0.159191	0.0373269	9.07453e-06	-0.152474	0.0343555	0.0734611	0.0718804	0.0401577	2.37505e-08	2.42705e-08	0.0735855	1	0.395701
rs599136	10:112823415	A:0.0600601	rs2856611	16:19507199	G:0.337838	17982	6667	5	1	0.0737615	1.4794e-05	-0.231441	0.0534291	1.74695e-05	-0.115761	0.0269526	1.64484e-05	-0.326263	0.0757282	3.55691e-06	-0.131489	0.0283643	0.0735289	0.134266	0.0750287	6.12948e-09	6.48331e-09	0.0737615	1	0.395701
rs1522812	2:226997454	A:0.360139	rs35748167	18:58037433	G:0.165007	17975	6640	5	1	0.0744699	4.07547e-05	0.109362	0.0266531	5.68451e-09	-0.260803	0.0447671	7.69427e-06	0.131413	0.0293757	9.88585e-05	-0.208256	0.0534897	0.0744646	-0.0610345	0.034217	6.03764e-12	7.3997e-12	0.0744699	1	0.395701
rs6585201	10:114768783	G:0.469174	rs12718338	10:114813047	C:0.45759	17826	6609	5	1	0.0746482	0.250869	-0.068089	0.0592985	0.162514	-0.0835721	0.0598369	0.790524	-0.0174348	0.0656358	0.859361	-0.0127066	0.0717127	0.0746708	-0.0624934	0.0350598	5.80414e-08	5.86466e-08	0.0746482	1	0.395701
rs6677242	1:217398785	A:0.275892	rs2856609	16:19506773	G:0.338444	17969	6666	5	1	0.0748269	3.14374e-05	-0.115693	0.0277921	1.14358e-05	-0.118206	0.0269381	1.81416e-05	-0.159824	0.0372843	5.64401e-06	-0.15641	0.0344568	0.0746794	0.0715287	0.0401299	1.13512e-08	1.19691e-08	0.0748269	1	0.395701
rs10885405	10:114777670	C:0.461045	rs7899529	10:114779538	G:0.453154	17995	6670	5	1	0.0748269	0.412234	-0.114065	0.139109	0.898943	-0.0178367	0.14045	0.500173	-0.0940616	0.139512	0.57504	0.0851147	0.151816	0.0748769	-0.06316	0.0354589	1.48091e-06	1.36706e-06	0.0748269	1	0.395701
rs6585201	10:114768783	G:0.466641	rs10885406	10:114777724	A:0.452316	17941	6651	5	1	0.0748269	0.0290641	-0.214058	0.098074	0.457239	0.0734719	0.0988322	0.0628131	-0.184858	0.0993584	0.134067	0.167861	0.112037	0.0748238	-0.0634135	0.0355947	9.06899e-08	9.07381e-08	0.0748269	1	0.395701
rs6677242	1:217398785	A:0.275889	rs2353696	16:19505813	T:0.338545	17971	6667	5	1	0.0748269	2.95418e-05	-0.116084	0.0277914	9.93185e-06	-0.119038	0.0269398	1.73241e-05	-0.160217	0.037287	5.04514e-06	-0.157246	0.0344618	0.0747217	0.071517	0.0401292	9.36461e-09	9.91985e-09	0.0748269	1	0.395701
rs6677242	1:217398785	A:0.275892	rs2856610	16:19507031	T:0.338444	17969	6666	5	1	0.0748269	3.14374e-05	-0.115693	0.0277921	1.14358e-05	-0.118206	0.0269381	1.81416e-05	-0.159824	0.0372843	5.64401e-06	-0.15641	0.0344568	0.0746794	0.0715287	0.0401299	1.13512e-08	1.19691e-08	0.0748269	1	0.395701
rs12258200	10:114781698	T:0.450086	rs6573817	14:68617269	G:0.319543	17971	6675	5	1	0.0750958	7.80805e-08	-0.138481	0.0257806	0.000115386	0.117635	0.0305092	8.25542e-08	-0.172883	0.0322455	0.136396	0.0639075	0.0429097	0.0750937	0.0622787	0.0349902	3.86524e-10	4.40608e-10	0.0750958	1	0.395701
rs1562692	3:34534267	G:0.121415	chr10:114772253:i	10:114772253	C:0.449774	17959	6662	5	1	0.0751857	6.79953e-05	0.21942	0.0550866	5.95985e-08	-0.13987	0.0258063	0.0420643	0.142446	0.0700711	1.26493e-08	-0.158217	0.0278025	0.075302	0.0809667	0.0455222	1.56322e-10	1.81667e-10	0.0751857	1	0.395701
rs849142	7:28185891	C:0.413598	rs11228658	11:56335596	T:0.169149	18061	6697	5	1	0.0752756	6.6566e-06	-0.116762	0.0259219	3.54994e-05	-0.139183	0.0336599	0.00219567	-0.0909404	0.0296958	0.118114	-0.0762217	0.0487744	0.075631	-0.0820376	0.0461763	6.87811e-09	7.37421e-09	0.0752756	1	0.395701
rs1875574	1:217403246	G:0.274312	rs2943645	2:227099180	C:0.355961	18016	6681	5	1	0.0752756	3.7312e-05	-0.114674	0.0278098	1.11061e-08	-0.146727	0.0256835	0.0970419	-0.0651962	0.0392898	0.00141703	-0.107703	0.0337504	0.0755651	-0.07157	0.0402753	1.27194e-11	1.55164e-11	0.0752756	1	0.395701
rs6997996	8:25891653	G:0.277424	rs10885409	10:114808072	T:0.456859	17895	6617	5	1	0.0752756	7.48481e-05	-0.110686	0.0279486	6.05789e-08	-0.139484	0.025749	9.84798e-05	-0.17052	0.0437869	8.27963e-08	-0.175213	0.0326833	0.0752471	0.0671444	0.0377437	9.60256e-11	1.12778e-10	0.0752756	1	0.395701
rs905293	1:217405444	T:0.274275	rs2245423	16:19505730	T:0.338351	18002	6675	5	1	0.0753657	2.78228e-05	-0.116599	0.0278239	1.17274e-05	-0.117955	0.0269144	1.6589e-05	-0.160609	0.0372949	5.73524e-06	-0.155877	0.034365	0.075231	0.0713882	0.0401271	1.0205e-08	1.08498e-08	0.0753657	1	0.395701
rs905293	1:217405444	T:0.274275	rs1475963	16:19505282	G:0.338351	18002	6675	5	1	0.0753657	2.78228e-05	-0.116599	0.0278239	1.17274e-05	-0.117955	0.0269144	1.6589e-05	-0.160609	0.0372949	5.73524e-06	-0.155877	0.034365	0.075231	0.0713882	0.0401271	1.0205e-08	1.08498e-08	0.0753657	1	0.395701
rs905293	1:217405444	T:0.274275	rs1475964	16:19505406	T:0.338351	18002	6675	5	1	0.0753657	2.78228e-05	-0.116599	0.0278239	1.17274e-05	-0.117955	0.0269144	1.6589e-05	-0.160609	0.0372949	5.73524e-06	-0.155877	0.034365	0.075231	0.0713882	0.0401271	1.0205e-08	1.08498e-08	0.0753657	1	0.395701
rs905293	1:217405444	T:0.274275	rs4421962	16:19505852	C:0.338351	18002	6675	5	1	0.0753657	2.78228e-05	-0.116599	0.0278239	1.17274e-05	-0.117955	0.0269144	1.6589e-05	-0.160609	0.0372949	5.73524e-06	-0.155877	0.034365	0.075231	0.0713882	0.0401271	1.0205e-08	1.08498e-08	0.0753657	1	0.395701
rs6677242	1:217398785	A:0.275851	rs1967951	16:19503773	T:0.338131	17959	6661	5	1	0.075456	2.87147e-05	-0.116354	0.0278131	1.59538e-05	-0.116289	0.0269493	1.71079e-05	-0.16042	0.0373101	7.47036e-06	-0.154437	0.0344738	0.0752843	0.0714821	0.0401872	1.43212e-08	1.5117e-08	0.075456	1	0.395701
rs74987670	10:112820864	G:0.0596812	rs2521791	16:19508824	C:0.337953	18004	6677	5	1	0.075456	1.37032e-05	-0.232975	0.0535752	2.02276e-05	-0.114754	0.0269227	1.586e-05	-0.327217	0.075808	4.20412e-06	-0.130277	0.0283148	0.0751158	0.134146	0.0753731	6.62108e-09	7.11853e-09	0.075456	1	0.395701
rs1000796	1:217402330	A:0.274258	rs1475964	16:19505406	T:0.338835	18025	6686	5	1	0.0755463	3.79917e-05	-0.114535	0.027804	1.46124e-05	-0.116562	0.0268919	2.12483e-05	-0.158577	0.0373002	6.87481e-06	-0.154439	0.0343386	0.075391	0.0712973	0.040098	1.69406e-08	1.78259e-08	0.0755463	1	0.395701
rs1000796	1:217402330	A:0.274258	rs2245423	16:19505730	T:0.338835	18025	6686	5	1	0.0755463	3.79917e-05	-0.114535	0.027804	1.46124e-05	-0.116562	0.0268919	2.12483e-05	-0.158577	0.0373002	6.87481e-06	-0.154439	0.0343386	0.075391	0.0712973	0.040098	1.69406e-08	1.78259e-08	0.0755463	1	0.395701
rs1000796	1:217402330	A:0.274258	rs4421962	16:19505852	C:0.338835	18025	6686	5	1	0.0755463	3.79917e-05	-0.114535	0.027804	1.46124e-05	-0.116562	0.0268919	2.12483e-05	-0.158577	0.0373002	6.87481e-06	-0.154439	0.0343386	0.075391	0.0712973	0.040098	1.69406e-08	1.78259e-08	0.0755463	1	0.395701
rs1000796	1:217402330	A:0.274258	rs1475963	16:19505282	G:0.338835	18025	6686	5	1	0.0755463	3.79917e-05	-0.114535	0.027804	1.46124e-05	-0.116562	0.0268919	2.12483e-05	-0.158577	0.0373002	6.87481e-06	-0.154439	0.0343386	0.075391	0.0712973	0.040098	1.69406e-08	1.78259e-08	0.0755463	1	0.395701
rs74987670	10:112820864	G:0.0596845	rs2187660	16:19508583	C:0.337944	18003	6677	5	1	0.0755463	1.35927e-05	-0.233069	0.0535748	2.01706e-05	-0.114769	0.0269222	1.58106e-05	-0.327266	0.0758072	4.19721e-06	-0.130284	0.0283143	0.0752519	0.134081	0.0753719	6.55033e-09	7.05096e-09	0.0755463	1	0.395701
rs74987670	10:112820864	G:0.0596845	rs2187659	16:19508573	A:0.337944	18003	6677	5	1	0.0755463	1.35927e-05	-0.233069	0.0535748	2.01706e-05	-0.114769	0.0269222	1.58106e-05	-0.327266	0.0758072	4.19721e-06	-0.130284	0.0283143	0.0752519	0.134081	0.0753719	6.55033e-09	7.05096e-09	0.0755463	1	0.395701
rs117537110	6:30649931	G:0.448306	rs10787473	10:114781400	C:0.452242	18039	6694	5	1	0.0756367	5.38419e-07	0.61777	0.123256	1.38936e-07	-0.134993	0.0256317	6.13802e-06	0.569861	0.126031	1.5112e-07	-0.170204	0.0324124	0.0755717	0.0461967	0.0259974	3.22226e-12	4.04272e-12	0.0756367	1	0.395701
rs7918599	10:114777396	C:0.449381	rs11158715	14:68489386	T:0.306444	17938	6663	5	1	0.0757273	5.28913e-08	-0.140404	0.0258034	0.000135172	0.110555	0.0289651	6.57615e-08	-0.17524	0.0324375	0.174936	0.0568171	0.0418847	0.0757222	0.0632615	0.0356189	3.13016e-10	3.60772e-10	0.0757273	1	0.395701
rs6585201	10:114768783	G:0.468689	rs11196205	10:114807047	G:0.456674	17853	6624	5	1	0.0757273	0.16484	-0.0828301	0.0596339	0.276127	-0.065486	0.0601306	0.619777	-0.0326795	0.0658639	0.940773	0.00535195	0.0720331	0.0757411	-0.0622278	0.0350391	1.11224e-07	1.11734e-07	0.0757273	1	0.395701
rs849142	7:28185891	C:0.413553	rs12288760	11:56333753	C:0.16913	18063	6698	5	1	0.0759997	6.52581e-06	-0.116871	0.0259219	3.46329e-05	-0.139371	0.0336593	0.00215226	-0.0911148	0.0296948	0.116442	-0.0765658	0.0487717	0.0763297	-0.0818418	0.0461759	6.5824e-09	7.11853e-09	0.0759997	1	0.395701
rs11158715	14:68489386	T:0.305599	rs2856611	16:19507199	G:0.338964	17968	6672	5	1	0.0760907	0.000210982	0.107301	0.0289574	1.71303e-05	-0.115822	0.0269395	7.54157e-05	0.1522	0.0384488	0.0359362	-0.0745748	0.0355516	0.0761897	-0.063039	0.0355503	1.00385e-07	1.01508e-07	0.0760907	1	0.395701
rs599136	10:112823415	A:0.0600733	rs2521791	16:19508824	C:0.337944	18003	6678	5	1	0.0762732	1.73075e-05	-0.229353	0.0533744	2.02477e-05	-0.114782	0.0269307	1.92168e-05	-0.323286	0.0756435	4.22524e-06	-0.130375	0.0283426	0.0759578	0.133047	0.0749716	8.27231e-09	8.92368e-09	0.0762732	1	0.395701
rs10787473	10:114781400	C:0.452984	rs6585202	10:114782803	T:0.461504	18015	6690	5	1	0.0762732	0.646685	-0.0623778	0.136086	0.58968	-0.0726974	0.1348	0.783564	0.04064	0.147955	0.693066	-0.0533758	0.135232	0.0763225	-0.0628617	0.0354663	8.72286e-07	8.30947e-07	0.0762732	1	0.395701
rs599136	10:112823415	A:0.0600767	rs2187660	16:19508583	C:0.337935	18002	6678	5	1	0.0763645	1.71673e-05	-0.229448	0.053374	2.01903e-05	-0.114797	0.0269302	1.91564e-05	-0.323335	0.0756428	4.21828e-06	-0.130383	0.028342	0.0760959	0.132983	0.0749705	8.18393e-09	8.83899e-09	0.0763645	1	0.395701
rs599136	10:112823415	A:0.0600767	rs2187659	16:19508573	A:0.337935	18002	6678	5	1	0.0763645	1.71673e-05	-0.229448	0.053374	2.01903e-05	-0.114797	0.0269302	1.91564e-05	-0.323335	0.0756428	4.21828e-06	-0.130383	0.028342	0.0760959	0.132983	0.0749705	8.18393e-09	8.83899e-09	0.0763645	1	0.395701
rs2308953	5:34909062	C:0.0832399	rs4132670	10:114767771	A:0.398241	17846	6617	5	1	0.0763645	1.82664e-09	0.755219	0.125608	1.75825e-19	0.237195	0.0262751	3.60229e-10	0.807435	0.12877	6.63694e-20	0.252228	0.0276159	0.0763967	-0.0798894	0.0450846	3.47343e-26	6.37632e-26	0.0763645	1	0.395701
rs117537110	6:30649931	G:0.447866	rs6585202	10:114782803	T:0.461656	18021	6693	5	1	0.0766394	5.4778e-07	0.61722	0.123228	1.29647e-07	-0.133997	0.0253813	6.09452e-06	0.569788	0.125973	1.64897e-07	-0.169614	0.0323994	0.0765877	0.0454998	0.025694	3.11095e-12	3.94688e-12	0.0766394	1	0.395701
rs11196205	10:114807047	G:0.456192	rs11158715	14:68489386	T:0.304109	17862	6636	5	1	0.0767313	2.09718e-08	-0.144363	0.0257617	0.00012843	0.111413	0.0290936	3.46683e-08	-0.179464	0.0325348	0.185091	0.0564122	0.0425675	0.0767103	0.0634843	0.0358648	1.31251e-10	1.55572e-10	0.0767313	1	0.395701
rs10885405	10:114777670	C:0.461327	rs10787473	10:114781400	C:0.452964	17997	6673	5	1	0.0768232	0.611801	-0.0691578	0.13627	0.638072	-0.0646955	0.137534	0.716949	-0.049556	0.136691	0.799652	0.0378694	0.149211	0.0768771	-0.0627674	0.0354798	1.15109e-06	1.09347e-06	0.0768232	1	0.395701
rs3821757	3:10948564	G:0.48505	rs10885405	10:114777670	C:0.461899	17926	6622	5	1	0.0769153	2.31913e-06	-0.151152	0.0320006	1.79989e-07	-0.132904	0.0254659	0.00598128	-0.109358	0.0397837	0.0122135	-0.0890459	0.0355343	0.0769799	-0.0480881	0.0271917	1.58605e-11	1.96063e-11	0.0769153	1	0.395701
rs12258200	10:114781698	T:0.451637	rs10885409	10:114808072	T:0.456713	17927	6658	5	1	0.0769153	0.70495	-0.029154	0.0769952	0.13446	-0.114813	0.0767083	0.659787	0.037672	0.0855779	0.460576	-0.0607904	0.0823832	0.0769534	-0.0623515	0.0352538	1.99638e-07	1.99819e-07	0.0769153	1	0.395701
rs1875574	1:217403246	G:0.274389	rs2187660	16:19508583	C:0.338306	18000	6679	5	1	0.0770999	3.28637e-05	-0.115502	0.027814	1.52177e-05	-0.116413	0.0269131	1.94001e-05	-0.159238	0.0372775	7.28482e-06	-0.154109	0.0343595	0.0768984	0.0709619	0.0401148	1.53945e-08	1.6502e-08	0.0770999	1	0.395701
rs1875574	1:217403246	G:0.274389	rs2187659	16:19508573	A:0.338306	18000	6679	5	1	0.0770999	3.28637e-05	-0.115502	0.027814	1.52177e-05	-0.116413	0.0269131	1.94001e-05	-0.159238	0.0372775	7.28482e-06	-0.154109	0.0343595	0.0768984	0.0709619	0.0401148	1.53945e-08	1.6502e-08	0.0770999	1	0.395701
rs10885405	10:114777670	C:0.461263	rs10885406	10:114777724	A:0.452821	18006	6675	5	1	0.0770999	0.614877	-0.0684163	0.135983	0.631247	-0.0658771	0.137252	0.71919	-0.0490436	0.136406	0.804971	0.0367926	0.149007	0.0771645	-0.0627113	0.0354826	1.04603e-06	9.99435e-07	0.0770999	1	0.395701
rs6677242	1:217398785	A:0.275889	rs4421962	16:19505852	C:0.33849	17971	6667	5	1	0.0773776	2.96541e-05	-0.116059	0.0277912	1.08026e-05	-0.118535	0.0269369	1.81503e-05	-0.159816	0.0372836	5.63821e-06	-0.156417	0.0344567	0.0771777	0.0709173	0.0401275	1.01454e-08	1.10166e-08	0.0773776	1	0.395701
rs6677242	1:217398785	A:0.275889	rs1475964	16:19505406	T:0.33849	17971	6667	5	1	0.0773776	2.96541e-05	-0.116059	0.0277912	1.08026e-05	-0.118535	0.0269369	1.81503e-05	-0.159816	0.0372836	5.63821e-06	-0.156417	0.0344567	0.0771777	0.0709173	0.0401275	1.01454e-08	1.10166e-08	0.0773776	1	0.395701
rs6677242	1:217398785	A:0.275889	rs2245423	16:19505730	T:0.33849	17971	6667	5	1	0.0773776	2.96541e-05	-0.116059	0.0277912	1.08026e-05	-0.118535	0.0269369	1.81503e-05	-0.159816	0.0372836	5.63821e-06	-0.156417	0.0344567	0.0771777	0.0709173	0.0401275	1.01454e-08	1.10166e-08	0.0773776	1	0.395701
rs6677242	1:217398785	A:0.275889	rs1475963	16:19505282	G:0.33849	17971	6667	5	1	0.0773776	2.96541e-05	-0.116059	0.0277912	1.08026e-05	-0.118535	0.0269369	1.81503e-05	-0.159816	0.0372836	5.63821e-06	-0.156417	0.0344567	0.0771777	0.0709173	0.0401275	1.01454e-08	1.10166e-08	0.0773776	1	0.395701
rs1502364	1:217392174	G:0.274209	rs2943645	2:227099180	C:0.356244	18041	6688	5	1	0.0773776	2.68239e-05	-0.11672	0.027798	1.24912e-08	-0.146104	0.0256642	0.0853204	-0.0675912	0.0392831	0.00145447	-0.107378	0.0337284	0.0776654	-0.0709526	0.0402135	1.02804e-11	1.287e-11	0.0773776	1	0.395701
rs6585201	10:114768783	G:0.466657	rs10885405	10:114777670	C:0.461468	17920	6646	5	1	0.0773776	0.00831433	-0.389258	0.1475	0.0912447	0.248728	0.147275	0.0191186	-0.349045	0.14896	0.0321829	0.329823	0.15397	0.0774169	-0.062277	0.035267	2.62637e-08	2.78639e-08	0.0773776	1	0.395701
rs6585201	10:114768783	G:0.466927	rs6585202	10:114782803	T:0.46174	17930	6657	5	1	0.0774704	0.00956097	-0.361823	0.139629	0.115001	0.219698	0.139393	0.0235203	-0.320217	0.141384	0.0407598	0.299254	0.146265	0.0774365	-0.0622128	0.0352329	2.22028e-08	2.36769e-08	0.0774704	1	0.395701
rs74987670	10:112820864	G:0.0596936	rs2074172	16:19529042	A:0.339276	17950	6653	5	1	0.0774704	1.25888e-05	-0.234353	0.0536628	1.69269e-05	-0.116091	0.0269855	1.57262e-05	-0.328345	0.0760363	3.57252e-06	-0.131531	0.0283789	0.0771816	0.133054	0.0752875	5.09145e-09	5.62431e-09	0.0774704	1	0.395701
rs1875574	1:217403246	G:0.274401	rs2521791	16:19508824	C:0.338315	18001	6679	5	1	0.0774704	3.22431e-05	-0.115622	0.0278137	1.52562e-05	-0.1164	0.0269136	1.92663e-05	-0.159297	0.037278	7.35299e-06	-0.154042	0.0343598	0.0773214	0.0708617	0.0401155	1.51706e-08	1.63299e-08	0.0774704	1	0.395701
rs10787472	10:114781297	A:0.452916	rs6585202	10:114782803	T:0.461628	18021	6694	5	1	0.0775633	0.686162	-0.0541564	0.134028	0.542435	-0.0808584	0.132743	0.740637	0.0483444	0.146051	0.643996	-0.0615481	0.133187	0.0776044	-0.0625894	0.0354663	8.63809e-07	8.34101e-07	0.0775633	1	0.395701
rs11158715	14:68489386	T:0.305956	rs62026181	16:19506239	T:0.33629	17983	6679	5	1	0.0776564	0.000204407	0.107502	0.028949	2.7418e-05	-0.112864	0.0269113	7.40933e-05	0.151819	0.0383115	0.0440384	-0.0716676	0.0355896	0.0777114	-0.0627951	0.0355957	1.51433e-07	1.53896e-07	0.0776564	1	0.395701
rs11158715	14:68489386	T:0.306053	rs2353696	16:19505813	T:0.339262	17992	6681	5	1	0.0776564	0.000185789	0.108179	0.0289434	1.43391e-05	-0.11679	0.0269188	6.9813e-05	0.152786	0.0384182	0.0330694	-0.0757464	0.035541	0.0777532	-0.0626517	0.0355194	7.48914e-08	7.75651e-08	0.0776564	1	0.395701
rs11196191	10:114780633	A:0.451581	rs10885409	10:114808072	T:0.456769	17927	6659	5	1	0.0777495	0.703122	-0.0293271	0.0769519	0.134398	-0.114776	0.0766714	0.66184	0.037425	0.0855675	0.458692	-0.0610054	0.0823282	0.0778017	-0.0621815	0.0352585	1.94443e-07	1.96433e-07	0.0777495	1	0.395701
rs905293	1:217405444	T:0.274296	rs2943645	2:227099180	C:0.355914	18017	6679	5	1	0.0778428	3.21485e-05	-0.115639	0.0278132	1.29233e-08	-0.146065	0.0256836	0.0899278	-0.066613	0.0392817	0.00146425	-0.10738	0.0337494	0.0781134	-0.0709501	0.0402728	1.28317e-11	1.60768e-11	0.0778428	1	0.395701
rs10787472	10:114781297	A:0.452277	rs10787473	10:114781400	C:0.452277	18052	6701	5	1	0.0778428	1.50896e-07	-0.134458	0.0256039	3.29444e-83			0.849796	-0.0138333	0.0730456	3.29444e-83			0.0778755	-0.0621887	0.0352714	1.46818e-07	2.11272e-07	0.0778428	1	0.395701
rs6585201	10:114768783	G:0.466137	chr10:114772253:i	10:114772253	C:0.44954	17925	6644	5	1	0.0778428	0.133424	-0.142773	0.0951353	0.9929	0.000857102	0.0963209	0.218298	-0.118321	0.0961128	0.371523	0.0994909	0.111334	0.0778831	-0.0631337	0.0358083	1.75665e-07	1.78132e-07	0.0778428	1	0.395701
rs849142	7:28185891	C:0.413818	rs7483053	11:56340724	T:0.169206	18049	6692	5	1	0.0779362	6.40218e-06	-0.116995	0.025926	3.39206e-05	-0.13958	0.033671	0.00209229	-0.0913906	0.029703	0.11397	-0.0771351	0.0488012	0.0782729	-0.0813264	0.0461873	6.3488e-09	7.01073e-09	0.0779362	1	0.395701
rs117537110	6:30649931	G:0.448108	rs10787472	10:114781297	A:0.452153	18047	6699	5	1	0.0780298	5.39854e-07	0.617715	0.123258	1.5122e-07	-0.134567	0.0256265	6.0627e-06	0.570201	0.126034	1.69209e-07	-0.169472	0.0324017	0.0779865	0.0458159	0.025995	3.50799e-12	4.5058e-12	0.0780298	1	0.395701
rs11158715	14:68489386	T:0.30607	rs1967952	16:19503828	T:0.339225	17991	6679	5	1	0.0780298	0.000181611	0.108345	0.0289436	1.60312e-05	-0.116118	0.0269164	6.89382e-05	0.152904	0.0384189	0.0345658	-0.0751138	0.0355415	0.0780848	-0.0625826	0.0355198	8.13733e-08	8.44138e-08	0.0780298	1	0.395701
rs11158715	14:68489386	T:0.30607	rs1475962	16:19503598	C:0.339225	17991	6679	5	1	0.0780298	0.000181611	0.108345	0.0289436	1.60312e-05	-0.116118	0.0269164	6.89382e-05	0.152904	0.0384189	0.0345658	-0.0751138	0.0355415	0.0780848	-0.0625826	0.0355198	8.13733e-08	8.44138e-08	0.0780298	1	0.395701
rs599136	10:112823415	A:0.0600869	rs2074172	16:19529042	A:0.339239	17949	6654	5	1	0.0780298	1.59015e-05	-0.230728	0.053461	1.64572e-05	-0.116286	0.0269917	1.89403e-05	-0.324497	0.0758696	3.47759e-06	-0.131809	0.0284048	0.0777501	0.132096	0.0748891	6.18359e-09	6.83902e-09	0.0780298	1	0.395701
rs10885405	10:114777670	C:0.461451	rs10787472	10:114781297	A:0.452897	18003	6677	5	1	0.0781234	0.563808	-0.0774323	0.134153	0.677262	-0.0563602	0.135415	0.667316	-0.05785	0.134587	0.756344	0.0456897	0.14725	0.0781809	-0.0624919	0.0354798	1.14213e-06	1.0997e-06	0.0781234	1	0.395701
rs1875574	1:217403246	G:0.274367	rs1134662	16:19510249	G:0.338436	17996	6673	5	1	0.0782172	3.31476e-05	-0.115473	0.0278201	1.93218e-05	-0.115016	0.0269195	1.99748e-05	-0.159068	0.0372947	9.02803e-06	-0.152582	0.0343712	0.0780791	0.0706989	0.0401255	1.95175e-08	2.10395e-08	0.0782172	1	0.395701
rs1875574	1:217403246	G:0.274367	rs2856614	16:19512116	T:0.338436	17996	6673	5	1	0.0782172	3.31476e-05	-0.115473	0.0278201	1.93218e-05	-0.115016	0.0269195	1.99748e-05	-0.159068	0.0372947	9.02803e-06	-0.152582	0.0343712	0.0780791	0.0706989	0.0401255	1.95175e-08	2.10395e-08	0.0782172	1	0.395701
rs10885406	10:114777724	A:0.452158	rs7899529	10:114779538	G:0.452518	18028	6684	5	1	0.0784992	0.089658	-0.864735	0.509506	0.150654	0.732577	0.509716	0.12578	-0.782453	0.511087	0.13043	0.770778	0.509636	0.0785235	-0.0621122	0.0353047	4.44217e-07	4.4167e-07	0.0784992	1	0.395701
rs2943645	2:227099180	C:0.355891	rs2308953	5:34909062	C:0.0843347	17976	6667	5	1	0.0784992	2.18153e-08	-0.14382	0.0256962	2.16954e-09	0.749955	0.125315	4.56327e-09	-0.158125	0.0269729	1.46393e-07	0.686151	0.13052	0.0787346	0.0809178	0.0460264	3.27154e-15	4.70434e-15	0.0784992	1	0.395701
rs10195178	2:227199263	T:0.427886	rs6585202	10:114782803	T:0.461683	18034	6700	5	1	0.0784992	1.45001e-06	0.120773	0.025067	1.64247e-07	-0.132836	0.0253706	1.23391e-05	0.176353	0.0403414	0.0431294	-0.0797151	0.039415	0.0786004	-0.0600168	0.0341224	8.53108e-12	1.08398e-11	0.0784992	1	0.395701
chr10:114772253:i	10:114772253	C:0.451281	rs10885409	10:114808072	T:0.456539	17878	6632	5	1	0.0785935	0.762923	-0.0231447	0.0767281	0.123559	-0.117701	0.0764289	0.610678	0.0434579	0.0853611	0.436329	-0.0639275	0.082126	0.0785644	-0.0621058	0.0353059	3.84813e-07	3.8457e-07	0.0785935	1	0.395701
rs1532716	1:217402689	A:0.274748	rs2972143	2:227116365	A:0.342301	17971	6650	5	1	0.0785935	4.7758e-05	-0.113171	0.0278312	7.17418e-10	-0.159978	0.0259612	0.0931839	-0.0652868	0.0388881	0.000353063	-0.121359	0.0339666	0.0788984	-0.0710747	0.0404497	1.06779e-12	1.40752e-12	0.0785935	1	0.395701
rs849135	7:28196413	A:0.422987	rs11228658	11:56335596	T:0.169189	17906	6648	5	1	0.0786879	4.91709e-06	-0.117072	0.025627	5.53671e-05	-0.136227	0.0337887	0.00214634	-0.0909081	0.0296195	0.153481	-0.0713145	0.0499631	0.0789711	-0.0816904	0.0465025	8.08069e-09	8.94071e-09	0.0786879	1	0.395701
rs10885406	10:114777724	A:0.452891	rs6585202	10:114782803	T:0.461502	18001	6678	5	1	0.0786879	0.634406	-0.0644005	0.135428	0.600299	-0.0702837	0.134137	0.797434	0.0378226	0.147359	0.704225	-0.0510874	0.134574	0.0787173	-0.0623871	0.035484	9.63649e-07	9.38012e-07	0.0786879	1	0.395701
rs11196191	10:114780633	A:0.449981	rs6573817	14:68617269	G:0.319591	17973	6676	5	1	0.0787824	7.7249e-08	-0.138524	0.0257794	0.000116514	0.117568	0.0305107	8.79287e-08	-0.1725	0.0322428	0.132808	0.0644994	0.0429104	0.0787296	0.0615218	0.0349933	3.85017e-10	4.56043e-10	0.0787824	1	0.395701
rs3761659	5:131657784	G:0.249584	rs7918599	10:114777396	C:0.449523	18048	6695	5	1	0.0787824	4.28666e-07	-0.180877	0.0357763	1.12082e-07	-0.136503	0.0257263	0.00518602	-0.129283	0.0462511	0.000375289	-0.108055	0.0303792	0.0789046	-0.0541577	0.0308226	1.43407e-12	1.88467e-12	0.0787824	1	0.395701
rs6604661	1:217409199	T:0.274145	rs1475962	16:19503598	C:0.338421	17985	6669	5	1	0.0789717	3.06276e-05	-0.116062	0.0278409	1.05079e-05	-0.118684	0.0269343	1.90011e-05	-0.15958	0.0373171	5.58296e-06	-0.156188	0.0343905	0.078736	0.0705767	0.0401445	9.96858e-09	1.10061e-08	0.0789717	1	0.395701
rs1502364	1:217392174	G:0.274286	rs2187660	16:19508583	C:0.338669	18025	6686	5	1	0.0789717	2.33241e-05	-0.117614	0.0278019	1.7438e-05	-0.115552	0.0269014	1.54976e-05	-0.161089	0.0372763	8.36613e-06	-0.15293	0.0343232	0.0788173	0.0704866	0.0401041	1.26631e-08	1.3901e-08	0.0789717	1	0.395701
rs1502364	1:217392174	G:0.274286	rs2187659	16:19508573	A:0.338669	18025	6686	5	1	0.0789717	2.33241e-05	-0.117614	0.0278019	1.7438e-05	-0.115552	0.0269014	1.54976e-05	-0.161089	0.0372763	8.36613e-06	-0.15293	0.0343232	0.0788173	0.0704866	0.0401041	1.26631e-08	1.3901e-08	0.0789717	1	0.395701
rs6604661	1:217409199	T:0.274145	rs1967952	16:19503828	T:0.338421	17985	6669	5	1	0.0789717	3.06276e-05	-0.116062	0.0278409	1.05079e-05	-0.118684	0.0269343	1.90011e-05	-0.15958	0.0373171	5.58296e-06	-0.156188	0.0343905	0.078736	0.0705767	0.0401445	9.96858e-09	1.10061e-08	0.0789717	1	0.395701
rs7708975	5:132650567	T:0.0961485	rs10885406	10:114777724	A:0.452092	18045	6690	5	1	0.0790666	0.000247762	-0.157413	0.0429556	2.03259e-07	-0.133143	0.0256225	0.000150265	-0.236841	0.0624806	4.28104e-08	-0.150236	0.027421	0.0786126	0.102057	0.0580266	1.33469e-09	1.54418e-09	0.0790666	1	0.395701
rs11158715	14:68489386	T:0.306053	rs1475963	16:19505282	G:0.339206	17992	6681	5	1	0.0790666	0.000186214	0.108162	0.0289433	1.55548e-05	-0.116295	0.026916	7.15857e-05	0.152553	0.0384173	0.0337651	-0.0754462	0.0355398	0.0791853	-0.0623494	0.035518	8.09769e-08	8.48967e-08	0.0790666	1	0.395701
rs11158715	14:68489386	T:0.306053	rs1475964	16:19505406	T:0.339206	17992	6681	5	1	0.0790666	0.000186214	0.108162	0.0289433	1.55548e-05	-0.116295	0.026916	7.15857e-05	0.152553	0.0384173	0.0337651	-0.0754462	0.0355398	0.0791853	-0.0623494	0.035518	8.09769e-08	8.48967e-08	0.0790666	1	0.395701
rs11158715	14:68489386	T:0.306053	rs4421962	16:19505852	C:0.339206	17992	6681	5	1	0.0790666	0.000186214	0.108162	0.0289433	1.55548e-05	-0.116295	0.026916	7.15857e-05	0.152553	0.0384173	0.0337651	-0.0754462	0.0355398	0.0791853	-0.0623494	0.035518	8.09769e-08	8.48967e-08	0.0790666	1	0.395701
rs1522812	2:226997454	A:0.359874	rs2308953	5:34909062	C:0.0849781	17834	6589	5	1	0.0790666	9.48946e-05	0.104459	0.0267617	3.4732e-09	0.740056	0.125274	0.00070414	0.0932376	0.0275203	1.73761e-06	0.648959	0.135715	0.0801166	0.10526	0.0601485	1.52232e-11	1.92524e-11	0.0790666	1	0.395701
rs11158715	14:68489386	T:0.306053	rs2245423	16:19505730	T:0.339206	17992	6681	5	1	0.0790666	0.000186214	0.108162	0.0289433	1.55548e-05	-0.116295	0.026916	7.15857e-05	0.152553	0.0384173	0.0337651	-0.0754462	0.0355398	0.0791853	-0.0623494	0.035518	8.09769e-08	8.48967e-08	0.0790666	1	0.395701
rs11158715	14:68489386	T:0.306003	rs2856610	16:19507031	T:0.339161	17990	6680	5	1	0.0791616	0.000196538	0.107775	0.0289451	1.64664e-05	-0.115962	0.0269172	7.48498e-05	0.152152	0.0384191	0.0345148	-0.0751306	0.0355395	0.0792938	-0.0623267	0.0355179	9.0072e-08	9.42545e-08	0.0791616	1	0.395701
rs11158715	14:68489386	T:0.306003	rs2856609	16:19506773	G:0.339161	17990	6680	5	1	0.0791616	0.000196538	0.107775	0.0289451	1.64664e-05	-0.115962	0.0269172	7.48498e-05	0.152152	0.0384191	0.0345148	-0.0751306	0.0355395	0.0792938	-0.0623267	0.0355179	9.0072e-08	9.42545e-08	0.0791616	1	0.395701
rs1532716	1:217402689	A:0.274347	rs2187660	16:19508583	C:0.338688	18021	6688	5	1	0.0792567	3.88971e-05	-0.114347	0.0277951	1.86063e-05	-0.115128	0.0268929	2.3056e-05	-0.157791	0.0372762	8.90386e-06	-0.152511	0.0343322	0.079136	0.0703864	0.0400897	2.19227e-08	2.38126e-08	0.0792567	1	0.395701
rs1532716	1:217402689	A:0.274347	rs2187659	16:19508573	A:0.338688	18021	6688	5	1	0.0792567	3.88971e-05	-0.114347	0.0277951	1.86063e-05	-0.115128	0.0268929	2.3056e-05	-0.157791	0.0372762	8.90386e-06	-0.152511	0.0343322	0.079136	0.0703864	0.0400897	2.19227e-08	2.38126e-08	0.0792567	1	0.395701
rs849135	7:28196413	A:0.422939	rs12288760	11:56333753	C:0.16917	17908	6649	5	1	0.0792567	4.80132e-06	-0.117199	0.0256268	5.40563e-05	-0.136415	0.0337881	0.00210025	-0.091096	0.0296182	0.151543	-0.0716484	0.0499605	0.0796223	-0.0815135	0.0465026	7.71064e-09	8.58973e-09	0.0792567	1	0.395701
rs117537110	6:30649931	G:0.448982	rs6585200	10:114768609	A:0.453544	17974	6670	5	1	0.079352	4.86696e-07	0.620696	0.123362	7.89696e-09	-0.149017	0.0258234	5.58465e-06	0.57299	0.126167	1.62587e-08	-0.183643	0.0325164	0.0793387	0.0459805	0.0262066	1.76884e-13	2.41878e-13	0.079352	1	0.395701
rs2972152	2:227066574	A:0.280484	rs1562692	3:34534267	G:0.121823	17903	6650	5	1	0.079352	9.31887e-07	-0.136465	0.0278187	7.37304e-05	0.218483	0.055118	1.97746e-07	-0.155856	0.0299639	0.0102778	0.163104	0.063555	0.0795036	0.090243	0.0514623	2.67516e-09	3.05657e-09	0.079352	1	0.395701
rs74987670	10:112820864	G:0.0597491	rs2521793	16:19511391	C:0.34052	17858	6620	5	1	0.079352	1.52921e-05	-0.23252	0.0537687	1.83684e-05	-0.115676	0.0270028	1.90859e-05	-0.326674	0.0764092	3.94575e-06	-0.131023	0.0283955	0.0790278	0.133256	0.075871	6.76487e-09	7.56656e-09	0.079352	1	0.395701
rs1502364	1:217392174	G:0.274298	rs2521791	16:19508824	C:0.338677	18026	6686	5	1	0.079352	2.28788e-05	-0.117733	0.0278016	1.7482e-05	-0.115539	0.0269019	1.53905e-05	-0.161148	0.0372767	8.44366e-06	-0.152864	0.0343235	0.0792465	0.070387	0.0401048	1.2479e-08	1.37561e-08	0.079352	1	0.395701
rs10195178	2:227199263	T:0.427902	rs10885406	10:114777724	A:0.452092	18045	6690	5	1	0.0794473	1.39051e-06	0.12096	0.0250624	1.96092e-07	-0.133353	0.02563	1.08051e-05	0.175182	0.0398105	0.0434014	-0.0801563	0.0396848	0.0795309	-0.0596163	0.0340001	1.01111e-11	1.29319e-11	0.0794473	1	0.395701
rs10195178	2:227199263	T:0.428036	rs10885405	10:114777670	C:0.461423	18016	6681	5	1	0.0794473	1.22169e-06	0.121691	0.0250802	1.91241e-07	-0.132247	0.0253946	1.13808e-05	0.177106	0.0403511	0.044917	-0.0791737	0.0394797	0.079509	-0.0598648	0.0341393	8.40703e-12	1.07879e-11	0.0794473	1	0.395701
rs1000796	1:217402330	A:0.274758	rs2972143	2:227116365	A:0.3423	17974	6650	5	1	0.0794473	4.7447e-05	-0.113224	0.0278339	7.24271e-10	-0.159931	0.0259599	0.0921371	-0.0654959	0.0388878	0.000350614	-0.121426	0.0339682	0.0798384	-0.0708538	0.0404503	1.07407e-12	1.42795e-12	0.0794473	1	0.395701
rs10885406	10:114777724	A:0.452257	rs10787472	10:114781297	A:0.452285	18034	6688	5	1	0.0794473	0.244768	-1.59117	1.36798	0.286727	1.45758	1.3682	0.271318	-1.503	1.36633	0.275453	1.48948	1.36575	0.0794978	-0.061889	0.0352924	6.37555e-07	6.33156e-07	0.0794473	1	0.395701
rs12258200	10:114781698	T:0.45015	rs8011527	14:68638685	A:0.320801	17994	6675	5	1	0.0794473	5.737e-08	-0.139861	0.0257722	0.000163184	0.115069	0.0305215	7.07709e-08	-0.173797	0.0322491	0.146758	0.0622191	0.0428778	0.0793955	0.0612223	0.0349003	3.98793e-10	4.75188e-10	0.0794473	1	0.395701
rs10885406	10:114777724	A:0.452257	rs10787473	10:114781400	C:0.452285	18034	6688	5	1	0.0794473	0.244768	-1.59117	1.36798	0.286727	1.45758	1.3682	0.271318	-1.503	1.36633	0.275453	1.48948	1.36575	0.0794978	-0.061889	0.0352924	6.37555e-07	6.33156e-07	0.0794473	1	0.395701
rs3821757	3:10948564	G:0.485478	rs12258200	10:114781698	T:0.450008	17973	6647	5	1	0.0795428	4.00627e-06	-0.147396	0.0319657	6.45705e-08	-0.139429	0.0257931	0.00622436	-0.107424	0.0392672	0.00683604	-0.0963313	0.0356159	0.0795465	-0.0476553	0.02718	9.27851e-12	1.18966e-11	0.0795428	1	0.395701
rs6997996	8:25891653	G:0.278182	rs12265291	10:114810240	T:0.449828	18008	6653	5	1	0.0796384	6.27224e-05	-0.111404	0.0278349	1.26956e-08	-0.147056	0.0258441	8.74782e-05	-0.168858	0.0430439	2.48079e-08	-0.18191	0.0326318	0.0794893	0.0656686	0.0374466	1.71996e-11	2.18287e-11	0.0796384	1	0.395701
rs1532716	1:217402689	A:0.274359	rs2521791	16:19508824	C:0.338697	18022	6688	5	1	0.0797341	3.81705e-05	-0.114467	0.0277948	1.86533e-05	-0.115115	0.0268934	2.2899e-05	-0.157851	0.0372766	8.98648e-06	-0.152444	0.0343326	0.0795679	0.0702865	0.0400904	2.16039e-08	2.35869e-08	0.0797341	1	0.395701
rs3821757	3:10948564	G:0.485508	rs11196191	10:114780633	A:0.449903	17975	6648	5	1	0.0797341	3.619e-06	-0.14807	0.0319657	6.37301e-08	-0.139484	0.0257921	0.00588669	-0.108135	0.0392645	0.00677085	-0.0964296	0.0356104	0.0797642	-0.0476178	0.0271782	8.30908e-12	1.06952e-11	0.0797341	1	0.395701
rs117537110	6:30649931	G:0.448092	rs10885405	10:114777670	C:0.461395	18003	6674	5	1	0.07983	5.4201e-07	0.61746	0.123225	1.51541e-07	-0.133394	0.0254052	5.93615e-06	0.570501	0.125976	1.97286e-07	-0.168633	0.0324177	0.0797702	0.0450579	0.0257177	3.58068e-12	4.68212e-12	0.07983	1	0.395701
rs849135	7:28196413	A:0.423159	rs7483053	11:56340724	T:0.169247	17894	6643	5	1	0.0800221	4.95204e-06	-0.117066	0.0256342	5.30357e-05	-0.136613	0.0337999	0.00212944	-0.0910098	0.0296298	0.149999	-0.0719599	0.0499883	0.0803662	-0.0813331	0.0465142	7.80154e-09	8.75511e-09	0.0800221	1	0.395701
rs10195178	2:227199263	T:0.42791	rs7904519	10:114773927	A:0.4501	18026	6685	5	1	0.0802147	1.56229e-06	0.120522	0.0250926	8.54504e-08	-0.137775	0.0257272	1.15516e-05	0.174504	0.0397876	0.0343385	-0.0844012	0.0398858	0.0803329	-0.0595515	0.0340536	5.2919e-12	6.89919e-12	0.0802147	1	0.395701
rs1502364	1:217392174	G:0.274263	rs1134662	16:19510249	G:0.338799	18021	6680	5	1	0.0802147	2.35308e-05	-0.117585	0.027808	2.21046e-05	-0.114156	0.0269078	1.59615e-05	-0.160921	0.0372935	1.03531e-05	-0.151405	0.0343349	0.0800132	0.0702255	0.0401149	1.60077e-08	1.76905e-08	0.0802147	1	0.395701
rs6604661	1:217409199	T:0.274188	rs2856609	16:19506773	G:0.338356	17984	6670	5	1	0.0802147	3.45475e-05	-0.115276	0.0278364	1.07778e-05	-0.118539	0.026935	2.12925e-05	-0.158568	0.0373024	5.8314e-06	-0.155871	0.0343903	0.0801032	0.0702481	0.0401397	1.15074e-08	1.28193e-08	0.0802147	1	0.395701
rs6604661	1:217409199	T:0.274188	rs2856610	16:19507031	T:0.338356	17984	6670	5	1	0.0802147	3.45475e-05	-0.115276	0.0278364	1.07778e-05	-0.118539	0.026935	2.12925e-05	-0.158568	0.0373024	5.8314e-06	-0.155871	0.0343903	0.0801032	0.0702481	0.0401397	1.15074e-08	1.28193e-08	0.0802147	1	0.395701
rs1502364	1:217392174	G:0.274263	rs2856614	16:19512116	T:0.338799	18021	6680	5	1	0.0802147	2.35308e-05	-0.117585	0.027808	2.21046e-05	-0.114156	0.0269078	1.59615e-05	-0.160921	0.0372935	1.03531e-05	-0.151405	0.0343349	0.0800132	0.0702255	0.0401149	1.60077e-08	1.76905e-08	0.0802147	1	0.395701
rs6604661	1:217409199	T:0.274185	rs2353696	16:19505813	T:0.338458	17986	6671	5	1	0.0804078	3.24711e-05	-0.115668	0.0278356	9.35632e-06	-0.119371	0.0269367	2.03498e-05	-0.158957	0.037305	5.21525e-06	-0.156703	0.0343953	0.0801824	0.0702284	0.040139	9.475e-09	1.06247e-08	0.0804078	1	0.395701
rs1532716	1:217402689	A:0.274324	rs1134662	16:19510249	G:0.338819	18017	6682	5	1	0.0805045	3.92418e-05	-0.114316	0.0278012	2.35655e-05	-0.113734	0.0268994	2.37401e-05	-0.157619	0.0372934	1.10122e-05	-0.150986	0.0343439	0.0803482	0.0701225	0.0401005	2.77129e-08	3.02991e-08	0.0805045	1	0.395701
rs2972143	2:227116365	A:0.342307	rs1562692	3:34534267	G:0.121631	17997	6661	5	1	0.0805045	1.36232e-09	-0.157205	0.0259419	8.22532e-05	0.216845	0.0550685	3.94964e-10	-0.176369	0.028192	0.0106764	0.161921	0.0634211	0.080508	0.0774987	0.0443421	5.31261e-12	6.94568e-12	0.0805045	1	0.395701
rs1532716	1:217402689	A:0.274324	rs2856614	16:19512116	T:0.338819	18017	6682	5	1	0.0805045	3.92418e-05	-0.114316	0.0278012	2.35655e-05	-0.113734	0.0268994	2.37401e-05	-0.157619	0.0372934	1.10122e-05	-0.150986	0.0343439	0.0803482	0.0701225	0.0401005	2.77129e-08	3.02991e-08	0.0805045	1	0.395701
rs7918599	10:114777396	C:0.451739	rs10885409	10:114808072	T:0.456735	17913	6649	5	1	0.0806013	0.783521	-0.0209171	0.0761361	0.108753	-0.121757	0.0759168	0.597727	0.0447029	0.0847172	0.405555	-0.0679889	0.0817428	0.0806204	-0.0615929	0.0352544	2.49427e-07	2.57455e-07	0.0806013	1	0.395701
rs3821757	3:10948564	G:0.484864	rs1967951	16:19503773	T:0.337749	18003	6650	5	1	0.0808927	2.78527e-06	-0.149708	0.0319476	2.41465e-05	-0.113661	0.026917	1.13241e-06	-0.186657	0.0383508	3.23516e-05	-0.163725	0.0393925	0.0808786	0.0511102	0.0292793	2.02524e-09	2.36426e-09	0.0808927	1	0.395701
rs6604661	1:217409199	T:0.274146	rs1967951	16:19503773	T:0.338044	17974	6665	5	1	0.0808927	3.15525e-05	-0.115941	0.0278574	1.50255e-05	-0.116631	0.026946	2.00714e-05	-0.159171	0.0373283	7.70617e-06	-0.153909	0.034407	0.0807214	0.0702049	0.0401971	1.45184e-08	1.61905e-08	0.0808927	1	0.395701
rs10885406	10:114777724	A:0.452109	rs1729752	13:95732362	G:0.297711	18041	6687	5	1	0.0810875	2.29593e-07	-0.132653	0.0256401	6.26945e-08	-0.168226	0.03109	0.000747204	-0.103336	0.0306485	0.0016607	-0.125	0.0397452	0.0812674	-0.0521634	0.0299209	4.75219e-13	6.50843e-13	0.0810875	1	0.395701
rs6604661	1:217409199	T:0.274207	rs2943645	2:227099180	C:0.355814	18001	6675	5	1	0.0811851	3.7594e-05	-0.114685	0.0278242	2.10598e-08	-0.143964	0.0256938	0.0922559	-0.0661745	0.039305	0.00174044	-0.10571	0.0337593	0.0815231	-0.070165	0.0402803	2.39494e-11	3.06771e-11	0.0811851	1	0.395701
rs8011527	14:68638685	A:0.320257	rs1967951	16:19503773	T:0.337957	18023	6678	5	1	0.0811851	0.000211524	0.113103	0.0305284	1.94021e-05	-0.114911	0.0269007	6.51051e-05	0.15476	0.0387529	0.0393857	-0.0736931	0.035771	0.0812774	-0.0590091	0.0338486	1.19559e-07	1.26664e-07	0.0811851	1	0.395701
chr10:114772253:i	10:114772253	C:0.449161	rs7972359	12:106264199	G:0.338538	17998	6672	5	1	0.0811851	9.02761e-08	-0.137782	0.0257764	3.72812e-05	0.10713	0.025979	4.17441e-07	-0.18087	0.0357391	0.22091	0.0507725	0.041477	0.0812081	0.0620283	0.0355724	1.36347e-10	1.68921e-10	0.0811851	1	0.395701
rs6585201	10:114768783	G:0.466691	rs11196191	10:114780633	A:0.449758	17953	6663	5	1	0.0811851	0.141133	-0.131667	0.0894727	0.881802	-0.0134621	0.0905413	0.252688	-0.10389	0.0908256	0.446676	0.0800103	0.105143	0.081247	-0.0622025	0.0356769	9.89248e-08	1.05341e-07	0.0811851	1	0.395701
rs8011527	14:68638685	A:0.320567	rs1134662	16:19510249	G:0.338344	18029	6680	5	1	0.0813807	0.00019871	0.113553	0.0305198	2.12053e-05	-0.114357	0.0268961	6.20596e-05	0.155211	0.0387558	0.0408842	-0.0731487	0.0357747	0.0814782	-0.0589605	0.0338431	1.22634e-07	1.30079e-07	0.0813807	1	0.395701
rs8011527	14:68638685	A:0.320567	rs2856614	16:19512116	T:0.338344	18029	6680	5	1	0.0813807	0.00019871	0.113553	0.0305198	2.12053e-05	-0.114357	0.0268961	6.20596e-05	0.155211	0.0387558	0.0408842	-0.0731487	0.0357747	0.0814782	-0.0589605	0.0338431	1.22634e-07	1.30079e-07	0.0813807	1	0.395701
rs6585201	10:114768783	G:0.46694	rs6573817	14:68617269	G:0.319596	17907	6643	5	1	0.0813807	1.81736e-08	-0.143553	0.0255044	9.23767e-05	0.119609	0.0305921	3.65525e-08	-0.17821	0.0323621	0.131582	0.0656318	0.0435255	0.0813623	0.0602125	0.0345486	7.24132e-11	9.10058e-11	0.0813807	1	0.395701
rs6585201	10:114768783	G:0.466826	rs12258200	10:114781698	T:0.449864	17951	6662	5	1	0.0814787	0.120686	-0.138763	0.0894146	0.942494	-0.00652744	0.0904888	0.221503	-0.110972	0.0907717	0.408665	0.0868257	0.105085	0.0814911	-0.0621493	0.0356749	8.8589e-08	9.48837e-08	0.0814787	1	0.395701
rs905293	1:217405444	T:0.274374	rs2187659	16:19508573	A:0.338259	18001	6677	5	1	0.0815768	2.84475e-05	-0.116434	0.027818	1.4722e-05	-0.116621	0.0269157	1.87807e-05	-0.159518	0.0372799	7.65224e-06	-0.153752	0.0343604	0.0814064	0.0699177	0.040123	1.29888e-08	1.46211e-08	0.0815768	1	0.395701
rs905293	1:217405444	T:0.274374	rs2187660	16:19508583	C:0.338259	18001	6677	5	1	0.0815768	2.84475e-05	-0.116434	0.027818	1.4722e-05	-0.116621	0.0269157	1.87807e-05	-0.159518	0.0372799	7.65224e-06	-0.153752	0.0343604	0.0814064	0.0699177	0.040123	1.29888e-08	1.46211e-08	0.0815768	1	0.395701
rs10195178	2:227199263	T:0.427903	rs10787473	10:114781400	C:0.452277	18052	6701	5	1	0.0816751	1.78694e-06	0.119655	0.0250527	1.68734e-07	-0.134016	0.0256204	1.31235e-05	0.173508	0.0398135	0.0406042	-0.081224	0.0396689	0.0817149	-0.0591888	0.0340005	1.10293e-11	1.43982e-11	0.0816751	1	0.395701
rs1000796	1:217402330	A:0.274356	rs2187660	16:19508583	C:0.338743	18024	6688	5	1	0.0817734	3.88181e-05	-0.114372	0.027798	1.82998e-05	-0.115229	0.0268932	2.40175e-05	-0.157487	0.0372852	9.1515e-06	-0.152316	0.034334	0.0815761	0.069828	0.0400939	2.14777e-08	2.39263e-08	0.0817734	1	0.395701
rs1000796	1:217402330	A:0.274356	rs2187659	16:19508573	A:0.338743	18024	6688	5	1	0.0817734	3.88181e-05	-0.114372	0.027798	1.82998e-05	-0.115229	0.0268932	2.40175e-05	-0.157487	0.0372852	9.1515e-06	-0.152316	0.034334	0.0815761	0.069828	0.0400939	2.14777e-08	2.39263e-08	0.0817734	1	0.395701
rs3821757	3:10948564	G:0.486822	rs6585201	10:114768783	G:0.467028	17909	6615	5	1	0.0817734	3.62125e-06	-0.148396	0.0320369	1.5169e-08	-0.144443	0.0255215	0.00740793	-0.106926	0.0399288	0.00457647	-0.101086	0.0356512	0.0817823	-0.047401	0.0272351	2.19739e-12	2.95369e-12	0.0817734	1	0.395701
rs1562692	3:34534267	G:0.121814	rs7904519	10:114773927	A:0.450835	17970	6668	5	1	0.0819706	6.16142e-05	0.220384	0.0550062	4.41587e-08	-0.141014	0.0257638	0.0378643	0.145264	0.0699624	1.03151e-08	-0.158922	0.027757	0.0820908	0.079045	0.0454626	1.0495e-10	1.31701e-10	0.0819706	1	0.395701
rs905293	1:217405444	T:0.274386	rs2521791	16:19508824	C:0.338268	18002	6677	5	1	0.0820693	2.79065e-05	-0.116553	0.0278176	1.47592e-05	-0.116608	0.0269162	1.86509e-05	-0.159577	0.0372803	7.72364e-06	-0.153686	0.0343608	0.0818494	0.0698175	0.0401237	1.27749e-08	1.44549e-08	0.0820693	1	0.395701
rs7899529	10:114779538	G:0.453214	rs6585202	10:114782803	T:0.461271	17997	6677	5	1	0.0821682	0.901749	-0.0171401	0.13884	0.400909	-0.115479	0.137475	0.57807	0.0836682	0.150427	0.484959	-0.096297	0.137892	0.0821484	-0.0616376	0.0354575	1.25806e-06	1.25667e-06	0.0821682	1	0.395701
rs1000796	1:217402330	A:0.274369	rs2521791	16:19508824	C:0.338752	18025	6688	5	1	0.0821682	3.80936e-05	-0.114492	0.0277977	1.83462e-05	-0.115216	0.0268937	2.38542e-05	-0.157546	0.0372856	9.23617e-06	-0.15225	0.0343343	0.0820176	0.0697284	0.0400946	2.11654e-08	2.36769e-08	0.0821682	1	0.395701
rs117537110	6:30649931	G:0.446331	rs621010	11:102353911	G:0.134186	17990	6670	5	1	0.0822672	7.17585e-07	0.609949	0.123059	0.132586	-0.0559224	0.037183	4.19492e-07	0.623912	0.123305	0.867772	0.00874063	0.0524995	0.0823142	-0.0646114	0.0371883	1.23856e-06	1.23896e-06	0.0822672	1	0.395701
rs12265291	10:114810240	T:0.449027	rs11158715	14:68489386	T:0.306201	17980	6674	5	1	0.0823664	3.16504e-09	-0.153174	0.0258617	0.000136877	0.110419	0.0289529	8.05707e-09	-0.187165	0.032453	0.16698	0.057863	0.0418699	0.0822801	0.0619564	0.0356562	2.18701e-11	2.83856e-11	0.0823664	1	0.395701
rs6997996	8:25891653	G:0.277855	rs2856608	16:19505751	G:0.334953	18004	6651	5	1	0.0824657	2.25379e-05	-0.117992	0.0278406	1.95723e-05	-0.114858	0.0269006	0.0629724	-0.0716397	0.0385287	0.0278348	-0.0765122	0.0347845	0.0826348	-0.0684085	0.0394149	1.1609e-08	1.32163e-08	0.0824657	1	0.395701
rs117537110	6:30649931	G:0.448813	rs10885406	10:114777724	A:0.452057	18032	6683	5	1	0.0825651	5.23535e-07	0.618432	0.123256	1.63149e-07	-0.134284	0.025641	5.74412e-06	0.571635	0.126033	1.97089e-07	-0.168728	0.0324348	0.0825483	0.0451355	0.0259984	3.66201e-12	4.91697e-12	0.0825651	1	0.395701
rs2713539	2:227137125	T:0.346853	rs849135	7:28196413	A:0.42259	17937	6659	5	1	0.0827643	1.48598e-08	-0.146381	0.0258479	6.11839e-06	-0.115831	0.0256135	0.0199272	-0.0932324	0.0400532	0.0410539	-0.072804	0.0356361	0.0830081	-0.0631769	0.0364448	2.90256e-12	3.92045e-12	0.0827643	1	0.395701
rs905293	1:217405444	T:0.274351	rs1134662	16:19510249	G:0.33839	17997	6671	5	1	0.0827643	2.86896e-05	-0.116405	0.027824	1.86993e-05	-0.115224	0.0269221	1.93357e-05	-0.159349	0.0372971	9.47909e-06	-0.152225	0.0343721	0.082642	0.0696545	0.0401338	1.64515e-08	1.86244e-08	0.0827643	1	0.395701
rs905293	1:217405444	T:0.274351	rs2856614	16:19512116	T:0.33839	17997	6671	5	1	0.0827643	2.86896e-05	-0.116405	0.027824	1.86993e-05	-0.115224	0.0269221	1.93357e-05	-0.159349	0.0372971	9.47909e-06	-0.152225	0.0343721	0.082642	0.0696545	0.0401338	1.64515e-08	1.86244e-08	0.0827643	1	0.395701
rs599136	10:112823415	A:0.0600923	rs2856608	16:19505751	G:0.334454	17989	6667	5	1	0.082864	1.40988e-05	-0.232021	0.0534325	1.34137e-05	-0.117213	0.0269254	1.84386e-05	-0.323626	0.0755605	2.94013e-06	-0.132538	0.0283507	0.0825567	0.130723	0.0752997	4.41059e-09	5.15661e-09	0.082864	1	0.395701
chr10:114772253:i	10:114772253	C:0.451786	rs11196208	10:114811316	T:0.457056	17837	6612	5	1	0.082864	0.74029	-0.0254379	0.0767429	0.123706	-0.117705	0.0764617	0.635291	0.040532	0.0854577	0.430102	-0.0648069	0.0821363	0.0828745	-0.0613255	0.0353615	2.5286e-07	2.66655e-07	0.082864	1	0.395701
rs6604661	1:217409199	T:0.274185	rs4421962	16:19505852	C:0.338402	17986	6671	5	1	0.082964	3.25913e-05	-0.115644	0.0278354	1.01778e-05	-0.118869	0.0269338	2.13051e-05	-0.15856	0.0373016	5.82542e-06	-0.155878	0.0343901	0.0827683	0.0696319	0.0401372	1.0275e-08	1.1788e-08	0.082964	1	0.395701
rs6604661	1:217409199	T:0.274185	rs2245423	16:19505730	T:0.338402	17986	6671	5	1	0.082964	3.25913e-05	-0.115644	0.0278354	1.01778e-05	-0.118869	0.0269338	2.13051e-05	-0.15856	0.0373016	5.82542e-06	-0.155878	0.0343901	0.0827683	0.0696319	0.0401372	1.0275e-08	1.1788e-08	0.082964	1	0.395701
rs1000796	1:217402330	A:0.274334	rs1134662	16:19510249	G:0.338873	18020	6682	5	1	0.082964	3.91614e-05	-0.114341	0.0278041	2.31816e-05	-0.113834	0.0268996	2.47284e-05	-0.157314	0.0373024	1.13154e-05	-0.150791	0.0343457	0.0828177	0.0695642	0.0401046	2.71769e-08	3.04436e-08	0.082964	1	0.395701
rs1000796	1:217402330	A:0.274334	rs2856614	16:19512116	T:0.338873	18020	6682	5	1	0.082964	3.91614e-05	-0.114341	0.0278041	2.31816e-05	-0.113834	0.0268996	2.47284e-05	-0.157314	0.0373024	1.13154e-05	-0.150791	0.0343457	0.0828177	0.0695642	0.0401046	2.71769e-08	3.04436e-08	0.082964	1	0.395701
rs6604661	1:217409199	T:0.274185	rs1475963	16:19505282	G:0.338402	17986	6671	5	1	0.082964	3.25913e-05	-0.115644	0.0278354	1.01778e-05	-0.118869	0.0269338	2.13051e-05	-0.15856	0.0373016	5.82542e-06	-0.155878	0.0343901	0.0827683	0.0696319	0.0401372	1.0275e-08	1.1788e-08	0.082964	1	0.395701
rs6604661	1:217409199	T:0.274185	rs1475964	16:19505406	T:0.338402	17986	6671	5	1	0.082964	3.25913e-05	-0.115644	0.0278354	1.01778e-05	-0.118869	0.0269338	2.13051e-05	-0.15856	0.0373016	5.82542e-06	-0.155878	0.0343901	0.0827683	0.0696319	0.0401372	1.0275e-08	1.1788e-08	0.082964	1	0.395701
rs11196191	10:114780633	A:0.450044	rs8011527	14:68638685	A:0.320849	17996	6676	5	1	0.0832645	5.67599e-08	-0.139904	0.025771	0.000164732	0.115003	0.030523	7.53663e-08	-0.173417	0.0322463	0.142999	0.0628046	0.0428785	0.0831667	0.0604737	0.0349034	3.97238e-10	4.91362e-10	0.0832645	1	0.396535
rs7708975	5:132650567	T:0.0960909	rs7899529	10:114779538	G:0.452481	18035	6688	5	1	0.083365	0.000245656	-0.15755	0.0429673	3.35205e-07	-0.130821	0.0256387	0.000160929	-0.235919	0.0625189	7.35049e-08	-0.147665	0.0274349	0.0829886	0.100617	0.0580393	2.15375e-09	2.5715e-09	0.083365	1	0.396535
rs7896811	10:114766717	T:0.139591	rs10861525	12:106260341	C:0.318666	17931	6646	5	1	0.083365	9.50387e-06	-0.158385	0.0357677	7.68727e-06	0.118448	0.0264764	0.0490027	-0.0980383	0.0498019	2.00971e-06	0.143835	0.0302654	0.0836512	-0.0931939	0.053873	2.35851e-09	2.81027e-09	0.083365	1	0.396535
rs599136	10:112823415	A:0.0601165	rs2521793	16:19511391	C:0.340511	17857	6621	5	1	0.0835662	2.11154e-05	-0.227831	0.0535726	1.84268e-05	-0.115691	0.0270107	2.61335e-05	-0.320654	0.0762594	4.09401e-06	-0.130931	0.0284227	0.083369	0.130683	0.0754754	9.21943e-09	1.06653e-08	0.0835662	1	0.396535
rs12258200	10:114781698	T:0.449751	rs1555944	14:68625118	G:0.322844	17891	6659	5	1	0.083768	1.33615e-07	-0.136173	0.0258205	0.0001483	0.115517	0.0304481	1.57197e-07	-0.170014	0.0324212	0.13976	0.0633047	0.0428694	0.0837278	0.060495	0.0349793	8.1508e-10	9.97836e-10	0.083768	1	0.396535
rs6585202	10:114782803	T:0.461755	rs10860059	12:97046476	G:0.258556	17911	6647	5	1	0.083768	2.72166e-07	-0.130965	0.0254707	3.14981e-05	-0.120164	0.0288693	0.00355826	-0.0953923	0.032726	0.269285	-0.0532518	0.0482043	0.0839017	-0.0666901	0.038583	1.90225e-10	2.40007e-10	0.083768	1	0.396535
rs6585201	10:114768783	G:0.467124	rs8011527	14:68638685	A:0.320841	17931	6643	5	1	0.083768	1.31328e-08	-0.144931	0.0254966	0.000117015	0.117865	0.0305961	3.00318e-08	-0.179342	0.0323649	0.138639	0.0644038	0.0434902	0.0837724	0.0595914	0.0344617	6.6515e-11	8.56773e-11	0.083768	1	0.396535
rs6677242	1:217398785	A:0.275988	rs2187659	16:19508573	A:0.338397	17970	6669	5	1	0.083768	3.03023e-05	-0.115897	0.0277853	1.35718e-05	-0.1172	0.0269382	2.05477e-05	-0.158721	0.0372686	7.52936e-06	-0.154282	0.0344521	0.0835283	0.0694363	0.0401233	1.29129e-08	1.48458e-08	0.083768	1	0.396535
rs6677242	1:217398785	A:0.275988	rs2187660	16:19508583	C:0.338397	17970	6669	5	1	0.083768	3.03023e-05	-0.115897	0.0277853	1.35718e-05	-0.1172	0.0269382	2.05477e-05	-0.158721	0.0372686	7.52936e-06	-0.154282	0.0344521	0.0835283	0.0694363	0.0401233	1.29129e-08	1.48458e-08	0.083768	1	0.396535
rs6677242	1:217398785	A:0.276	rs2521791	16:19508824	C:0.338406	17971	6669	5	1	0.0840717	2.97361e-05	-0.116015	0.0277849	1.36062e-05	-0.117187	0.0269387	2.04092e-05	-0.15878	0.037269	7.59916e-06	-0.154215	0.0344525	0.0839752	0.0693372	0.040124	1.27251e-08	1.4677e-08	0.0840717	1	0.39764
rs7896811	10:114766717	T:0.139344	rs4919764	12:53272051	G:0.428397	17995	6674	5	1	0.0843766	9.72189e-06	-0.158075	0.0357371	2.3545e-06	0.120368	0.0254999	3.51722e-05	-0.232333	0.0561585	0.000778426	0.0970018	0.0288665	0.0844913	0.0870076	0.0504333	7.06082e-10	8.72032e-10	0.0843766	1	0.398567
rs6585201	10:114768783	G:0.466546	rs1729752	13:95732362	G:0.298611	17995	6671	5	1	0.0844785	1.89621e-08	-0.143115	0.0254598	6.41217e-08	-0.168464	0.0311572	0.000207159	-0.113676	0.0306394	0.00217555	-0.123948	0.0404377	0.0845971	-0.051708	0.0299824	4.15648e-14	6.10944e-14	0.0844785	1	0.398567
rs1875574	1:217403246	G:0.274261	rs62026181	16:19506239	T:0.335455	17992	6675	5	1	0.0844785	3.37607e-05	-0.115374	0.0278245	2.09646e-05	-0.114483	0.0269095	2.22973e-05	-0.157967	0.0372515	1.07112e-05	-0.151301	0.0343687	0.0843178	0.069525	0.0402772	2.15407e-08	2.46197e-08	0.0844785	1	0.398567
rs3821757	3:10948564	G:0.484129	chr10:114772253:i	10:114772253	C:0.44957	17926	6621	5	1	0.0845805	4.87532e-06	-0.146241	0.0319997	1.25308e-07	-0.13656	0.0258363	0.00651691	-0.106913	0.0392979	0.00815714	-0.0942338	0.0356205	0.0845853	-0.0469448	0.0272194	2.17636e-11	2.88519e-11	0.0845805	1	0.398686
rs11572103	10:96818106	T:0.479153	rs4148475	13:95853574	T:0.245941	18108	6712	5	1	0.0846827	0.00544616	-0.106565	0.0383412	0.0022777	-0.119666	0.0392165	0.118327	-0.0689934	0.0441746	0.422256	-0.0463141	0.0577113	0.0845783	-0.0643249	0.0372959	2.74745e-07	2.94031e-07	0.0846827	1	0.398686
rs10195178	2:227199263	T:0.427879	rs10787472	10:114781297	A:0.452187	18060	6706	5	1	0.084785	1.88759e-06	0.119358	0.0250485	1.84647e-07	-0.133561	0.0256151	1.44155e-05	0.172649	0.0398045	0.0403967	-0.0813042	0.039667	0.0848721	-0.0585775	0.0339956	1.26451e-11	1.69636e-11	0.084785	1	0.398686
rs1532716	1:217402689	A:0.27427	rs2943645	2:227099180	C:0.356129	18037	6690	5	1	0.084785	4.45888e-05	-0.113453	0.0277914	1.34271e-08	-0.145781	0.0256632	0.0954283	-0.0655029	0.0392837	0.00136637	-0.107989	0.0337291	0.0851165	-0.0692612	0.0402275	1.80075e-11	2.40019e-11	0.084785	1	0.398686
rs6677242	1:217398785	A:0.275966	rs2856614	16:19512116	T:0.338528	17966	6663	5	1	0.08499	3.06111e-05	-0.115858	0.0277913	1.72561e-05	-0.115801	0.0269447	2.11937e-05	-0.158536	0.0372857	9.3328e-06	-0.152747	0.034464	0.0848297	0.0691643	0.0401342	1.64033e-08	1.89646e-08	0.08499	1	0.398989
rs6677242	1:217398785	A:0.275966	rs1134662	16:19510249	G:0.338528	17966	6663	5	1	0.08499	3.06111e-05	-0.115858	0.0277913	1.72561e-05	-0.115801	0.0269447	2.11937e-05	-0.158536	0.0372857	9.3328e-06	-0.152747	0.034464	0.0848297	0.0691643	0.0401342	1.64033e-08	1.89646e-08	0.08499	1	0.398989
rs17866193	4:118392862	C:0.44238	rs10746051	12:106256437	C:0.326552	17893	6628	5	1	0.0854016	3.001e-06	0.119252	0.0255316	1.36442e-05	0.114888	0.0264141	5.01999e-06	0.161217	0.035324	5.11846e-05	0.172199	0.0425166	0.0855354	-0.0624903	0.0363436	1.41938e-09	1.74335e-09	0.0854016	1	0.400081
rs6997996	8:25891653	G:0.278098	rs12255372	10:114808902	T:0.28453	18035	6665	5	1	0.0854016	4.41947e-05	-0.113735	0.0278464	2.99078e-16	0.220798	0.0270133	0.0555021	-0.0712188	0.0371914	2.13077e-13	0.260299	0.0354615	0.0855763	-0.0729208	0.0424153	5.47018e-19	9.38032e-19	0.0854016	1	0.400081
rs7899529	10:114779538	G:0.452602	rs10787473	10:114781400	C:0.452269	18028	6686	5	1	0.0855048	0.279814	0.566925	0.524573	0.182357	-0.699273	0.524377	0.248438	0.605327	0.524477	0.238389	-0.61995	0.525816	0.0855547	-0.0606878	0.0352974	7.21035e-07	7.55864e-07	0.0855048	1	0.400081
rs7899529	10:114779538	G:0.452602	rs10787472	10:114781297	A:0.452269	18028	6686	5	1	0.0855048	0.279814	0.566925	0.524573	0.182357	-0.699273	0.524377	0.248438	0.605327	0.524477	0.238389	-0.61995	0.525816	0.0855547	-0.0606878	0.0352974	7.21035e-07	7.55864e-07	0.0855048	1	0.400081
rs1000796	1:217402330	A:0.274279	rs2943645	2:227099180	C:0.356125	18040	6690	5	1	0.0858153	4.42917e-05	-0.113507	0.027794	1.36186e-08	-0.14571	0.0256618	0.0943978	-0.065707	0.0392833	0.00136184	-0.108026	0.0337306	0.0860585	-0.069054	0.040228	1.81842e-11	2.44665e-11	0.0858153	1	0.401202
rs1875574	1:217403246	G:0.27449	rs2856611	16:19507199	G:0.338154	17977	6668	5	1	0.086023	3.7792e-05	-0.11465	0.0278237	1.35267e-05	-0.117205	0.026935	2.50972e-05	-0.157159	0.0372952	7.70972e-06	-0.153898	0.0344053	0.0857792	0.0689616	0.0401384	1.55911e-08	1.82208e-08	0.086023	1	0.401287
rs117537110	6:30649931	G:0.448702	rs7899529	10:114779538	G:0.452447	18022	6681	5	1	0.0863355	3.25314e-07	0.630873	0.123503	2.70135e-07	-0.131965	0.0256583	3.68638e-06	0.584515	0.126291	3.10851e-07	-0.165976	0.0324378	0.0862159	0.0446416	0.0260194	3.67276e-12	5.10938e-12	0.0863355	1	0.401287
rs2308953	5:34909062	C:0.0841864	rs74987670	10:112820864	G:0.0597975	17877	6628	5	1	0.0863355	1.95992e-09	0.750556	0.12507	8.9834e-06	-0.238688	0.0537549	7.08646e-10	0.775627	0.125829	0.000225248	-0.208141	0.056424	0.0875114	-0.158011	0.0924757	9.44164e-13	1.34411e-12	0.0863355	1	0.401287
rs3821757	3:10948564	G:0.485135	rs7918599	10:114777396	C:0.450061	17962	6639	5	1	0.0863355	3.35247e-06	-0.148542	0.0319585	1.00351e-07	-0.137332	0.0257849	0.00529214	-0.109463	0.0392526	0.00751029	-0.095184	0.0356051	0.0862975	-0.0465967	0.027166	1.18211e-11	1.61076e-11	0.0863355	1	0.401287
rs3739480	9:19516280	G:0.500365	rs1555944	14:68625118	G:0.318859	17790	6621	5	1	0.0863355	1.17842e-05	-0.172797	0.0394374	0.000234921	0.112564	0.0306033	2.89967e-06	-0.206657	0.0441783	0.139437	0.062549	0.0423231	0.0863564	0.0502016	0.0292731	6.10053e-08	6.90694e-08	0.0863355	1	0.401287
rs12258200	10:114781698	T:0.452159	rs11196208	10:114811316	T:0.457136	17882	6637	5	1	0.08644	0.816022	-0.0178478	0.0767104	0.0931424	-0.128375	0.076457	0.582114	0.0469623	0.0853394	0.356088	-0.0758503	0.0821918	0.0864254	-0.0605385	0.0353084	1.15994e-07	1.29217e-07	0.08644	1	0.401287
rs74987670	10:112820864	G:0.0596998	rs2856608	16:19505751	G:0.334436	17990	6666	5	1	0.08644	1.11332e-05	-0.235663	0.0536341	1.41414e-05	-0.116871	0.0269186	1.64014e-05	-0.326241	0.075712	3.20402e-06	-0.131921	0.0283258	0.0861263	0.129847	0.0756598	3.696e-09	4.48605e-09	0.08644	1	0.401287
rs1502364	1:217392174	G:0.274158	rs62026181	16:19506239	T:0.335822	18017	6682	5	1	0.08644	2.39646e-05	-0.117489	0.0278123	2.38399e-05	-0.113657	0.0268979	1.78214e-05	-0.159826	0.0372504	1.22103e-05	-0.150162	0.0343323	0.0863548	0.0690546	0.0402663	1.75982e-08	2.05836e-08	0.08644	1	0.401287
rs1532716	1:217402689	A:0.274219	rs62026181	16:19506239	T:0.335841	18013	6684	5	1	0.0867542	3.99654e-05	-0.114216	0.0278055	2.55002e-05	-0.113213	0.0268893	2.64328e-05	-0.156533	0.0372502	1.30008e-05	-0.149732	0.0343414	0.0866128	0.0689729	0.0402517	3.0526e-08	3.53175e-08	0.0867542	1	0.401287
rs7708975	5:132650567	T:0.0961805	rs11196191	10:114780633	A:0.449377	18065	6707	5	1	0.0868592	0.000265556	-0.156459	0.0429034	6.74306e-08	-0.138804	0.0257144	0.00017404	-0.233001	0.0620675	1.57654e-08	-0.155252	0.0274635	0.0864579	0.0996461	0.0581235	4.98249e-10	6.3428e-10	0.0868592	1	0.401287
rs8011527	14:68638685	A:0.320339	rs2521791	16:19508824	C:0.338222	18034	6686	5	1	0.0869643	0.000215463	0.112919	0.0305172	1.67408e-05	-0.115746	0.0268899	7.1939e-05	0.153803	0.0387435	0.0352476	-0.0752965	0.0357618	0.0870671	-0.0578963	0.0338362	1.05717e-07	1.18627e-07	0.0869643	1	0.401287
rs8011527	14:68638685	A:0.320093	rs62026181	16:19506239	T:0.33546	18026	6682	5	1	0.0870696	0.00019821	0.113585	0.030523	1.98385e-05	-0.114716	0.0268863	6.62628e-05	0.154228	0.0386602	0.0384653	-0.0741251	0.0358116	0.0870435	-0.0580374	0.0339161	1.15655e-07	1.29586e-07	0.0870696	1	0.401287
rs6677242	1:217398785	A:0.275909	rs2943645	2:227099180	C:0.355971	17986	6671	5	1	0.0870696	3.578e-05	-0.114821	0.0277805	1.08684e-08	-0.146898	0.0256967	0.0867646	-0.0672458	0.0392626	0.00124694	-0.109188	0.033826	0.0873576	-0.068768	0.0402269	1.1672e-11	1.60152e-11	0.0870696	1	0.401287
rs3821757	3:10948564	G:0.483163	rs7904519	10:114773927	A:0.450633	17937	6627	5	1	0.0870696	5.46679e-06	-0.145423	0.0319891	8.69035e-08	-0.138071	0.0257972	0.00682703	-0.106345	0.0393118	0.006877	-0.0961385	0.0355707	0.0871153	-0.0465171	0.02719	1.65893e-11	2.26169e-11	0.0870696	1	0.401287
rs8011527	14:68638685	A:0.320302	rs2187659	16:19508573	A:0.338213	18033	6686	5	1	0.0870696	0.000212392	0.113029	0.0305172	1.66907e-05	-0.115762	0.0268894	7.11774e-05	0.1539	0.038743	0.0351771	-0.0753251	0.0357616	0.0871696	-0.0578758	0.0338352	1.03976e-07	1.16837e-07	0.0870696	1	0.401287
rs8011527	14:68638685	A:0.320302	rs2187660	16:19508583	C:0.338213	18033	6686	5	1	0.0870696	0.000212392	0.113029	0.0305172	1.66907e-05	-0.115762	0.0268894	7.11774e-05	0.1539	0.038743	0.0351771	-0.0753251	0.0357616	0.0871696	-0.0578758	0.0338352	1.03976e-07	1.16837e-07	0.0870696	1	0.401287
rs11196191	10:114780633	A:0.452103	rs11196208	10:114811316	T:0.457192	17882	6638	5	1	0.0872806	0.813931	-0.0180442	0.076667	0.0931335	-0.128316	0.07642	0.584273	0.046688	0.0853288	0.354569	-0.0760394	0.0821369	0.0873527	-0.0603688	0.0353131	1.12976e-07	1.26905e-07	0.0872806	1	0.401287
rs1875574	1:217403246	G:0.274627	rs2074172	16:19529042	A:0.33962	17948	6656	5	1	0.0873863	3.91391e-05	-0.11449	0.0278395	1.2037e-05	-0.11806	0.0269732	2.65756e-05	-0.156913	0.0373514	7.17061e-06	-0.154603	0.0344438	0.0872739	0.0686137	0.040126	1.44335e-08	1.71104e-08	0.0873863	1	0.401287
rs3761659	5:131657784	G:0.250346	rs10787473	10:114781400	C:0.452269	18049	6699	5	1	0.0873863	4.30659e-07	-0.180949	0.0357968	1.85811e-07	-0.133614	0.0256308	0.0048651	-0.13054	0.0463593	0.000457112	-0.106068	0.0302644	0.0875896	-0.052669	0.0308321	2.32999e-12	3.29841e-12	0.0873863	1	0.401287
rs2894593	2:227190317	T:0.382843	rs7708975	5:132650567	T:0.0961592	18121	6720	5	1	0.0873863	6.26171e-06	-0.116381	0.025763	0.000231688	-0.157744	0.0428454	1.39864e-06	-0.134474	0.0278692	0.000128395	-0.228258	0.0596049	0.086938	0.103245	0.0603144	3.53072e-08	4.09314e-08	0.0873863	1	0.401287
rs3821757	3:10948564	G:0.486095	rs6585199	10:114765171	G:0.456941	17871	6607	5	1	0.0874921	3.23029e-06	-0.149399	0.0320901	1.50133e-08	-0.146047	0.0257969	0.00551987	-0.109831	0.0395783	0.00365384	-0.103811	0.0357155	0.0875394	-0.0465692	0.027257	1.80224e-12	2.56495e-12	0.0874921	1	0.401287
rs7899529	10:114779538	G:0.452498	rs1729752	13:95732362	G:0.297876	18031	6685	5	1	0.0875981	3.82085e-07	-0.130277	0.0256568	5.11912e-08	-0.169357	0.0310911	0.000924646	-0.101568	0.0306619	0.00141519	-0.126943	0.0397749	0.0877358	-0.0511064	0.0299312	6.32645e-13	9.17107e-13	0.0875981	1	0.401287
rs6585201	10:114768783	G:0.466596	rs1555944	14:68625118	G:0.322909	17827	6627	5	1	0.0877042	3.45487e-08	-0.140891	0.0255392	0.000119	0.117486	0.0305304	7.15675e-08	-0.175239	0.0325288	0.137607	0.0645732	0.0434906	0.0876661	0.0590011	0.0345472	1.70517e-10	2.23599e-10	0.0877042	1	0.401287
rs11196191	10:114780633	A:0.449645	rs1555944	14:68625118	G:0.322892	17893	6660	5	1	0.0877042	1.32211e-07	-0.136216	0.0258193	0.000149786	0.115448	0.0304497	1.67276e-07	-0.169628	0.0324184	0.136122	0.0638932	0.0428701	0.0876919	0.0597393	0.0349823	8.1349e-10	1.03276e-09	0.0877042	1	0.401287
rs1502364	1:217392174	G:0.274386	rs2856611	16:19507199	G:0.338518	18002	6675	5	1	0.0880233	2.6859e-05	-0.116769	0.0278116	1.55402e-05	-0.116333	0.0269233	2.00974e-05	-0.159014	0.037294	8.86491e-06	-0.152707	0.034369	0.0878979	0.0684817	0.0401277	1.28877e-08	1.54079e-08	0.0880233	1	0.401287
rs117537110	6:30649931	G:0.446011	rs7904519	10:114773927	A:0.450064	18013	6678	5	1	0.0882368	6.15467e-07	0.614672	0.123272	7.52446e-08	-0.13844	0.0257412	6.43693e-06	0.568641	0.126043	1.10007e-07	-0.171883	0.0323735	0.0881101	0.0446269	0.0261672	2.03424e-12	2.90867e-12	0.0882368	1	0.401287
rs1532716	1:217402689	A:0.274447	rs2856611	16:19507199	G:0.338538	17998	6677	5	1	0.0884509	4.46688e-05	-0.113496	0.0278048	1.65776e-05	-0.115911	0.0269148	2.97775e-05	-0.155708	0.0372939	9.43253e-06	-0.152287	0.034378	0.0882594	0.0683793	0.0401133	2.22245e-08	2.63167e-08	0.0884509	1	0.401287
rs599136	10:112823415	A:0.0600333	rs4148427	13:95925674	T:0.250735	18015	6680	5	1	0.0884509	1.79136e-05	-0.228928	0.0533703	9.81763e-06	-0.155641	0.0352037	7.36371e-06	-0.290114	0.0647157	2.80398e-06	-0.168975	0.0360698	0.0882741	0.111136	0.065199	4.17994e-09	5.1517e-09	0.0884509	1	0.401287
rs7896811	10:114766717	T:0.139435	rs35748167	18:58037433	G:0.168361	18098	6707	5	1	0.0885581	9.87028e-06	-0.157468	0.0356263	3.76368e-09	-0.264099	0.0448061	2.36652e-06	-0.184639	0.0391242	8.83003e-10	-0.288006	0.0469888	0.0882976	0.0860139	0.0504644	1.13002e-12	1.63656e-12	0.0885581	1	0.401287
rs8011527	14:68638685	A:0.320266	rs2353696	16:19505813	T:0.33837	18035	6684	5	1	0.0885581	0.000203437	0.113361	0.0305168	1.20935e-05	-0.117674	0.0268914	7.0203e-05	0.154089	0.0387586	0.0302785	-0.0774518	0.0357509	0.0886147	-0.0576093	0.0338331	7.37303e-08	8.47354e-08	0.0885581	1	0.401287
chr10:114772253:i	10:114772253	C:0.45172	rs12718338	10:114813047	C:0.457661	17844	6615	5	1	0.0885581	0.800934	-0.0193685	0.0768171	0.105513	-0.123848	0.0765111	0.589983	0.0461962	0.0857294	0.375644	-0.0726644	0.0820186	0.0885934	-0.0602187	0.0353632	2.31585e-07	2.57944e-07	0.0885581	1	0.401287
rs7708975	5:132650567	T:0.0961358	rs12258200	10:114781698	T:0.449482	18063	6706	5	1	0.0886655	0.000280995	-0.155835	0.0429035	6.83125e-08	-0.138749	0.0257155	0.000186232	-0.231976	0.0620756	1.62739e-08	-0.155105	0.0274641	0.0882086	0.0991017	0.0581268	5.31939e-10	6.87321e-10	0.0886655	1	0.401287
rs12258200	10:114781698	T:0.451649	rs11196205	10:114807047	G:0.456838	17921	6656	5	1	0.0886655	0.562962	-0.0446159	0.0771304	0.198353	-0.0987976	0.0768102	0.813807	0.0202178	0.0858442	0.566172	-0.0472668	0.0823897	0.0887443	-0.060034	0.0352714	2.4967e-07	2.7776e-07	0.0886655	1	0.401287
chr10:114772253:i	10:114772253	C:0.45129	rs11196205	10:114807047	G:0.456662	17871	6630	5	1	0.088773	0.6674	-0.0330595	0.0769329	0.160632	-0.107478	0.0766088	0.709702	0.0318974	0.0856866	0.496579	-0.0558908	0.0822066	0.0887244	-0.0601268	0.0353237	4.44651e-07	4.86972e-07	0.088773	1	0.401287
rs1502364	1:217392174	G:0.274161	rs1000796	1:217402330	A:0.2743	18035	6686	5	1	0.088773	0.276889	-1.22121	1.12312	0.324837	1.10577	1.12311	0.240817	-1.32005	1.12541	0.332659	1.08884	1.12394	0.0884386	0.0733341	0.0430442	8.7939e-05	7.99858e-05	0.088773	1	0.401287
rs7904519	10:114773927	A:0.449927	rs11158715	14:68489386	T:0.305543	17914	6651	5	1	0.0888806	4.71817e-08	-0.140994	0.0258154	0.00011621	0.11178	0.0290038	7.69675e-08	-0.17438	0.0324483	0.15291	0.0600501	0.0420128	0.0887822	0.0607532	0.0356982	2.41644e-10	3.17974e-10	0.0888806	1	0.401287
rs4148749	7:87144413	C:0.489059	rs35748167	18:58037433	G:0.168772	18051	6692	5	1	0.0892044	0.109086	0.0852618	0.0532116	0.00125155	-0.196217	0.0608074	0.0247488	0.138295	0.0615931	0.0732754	-0.129502	0.0723027	0.0896753	-0.104226	0.0614136	6.58883e-09	8.0889e-09	0.0892044	1	0.401287
rs1604525	1:217377592	T:0.27399	rs4646591	15:58303002	G:0.476564	18028	6693	5	1	0.0893127	2.42877e-05	-0.117336	0.0277961	1.10197e-06	0.188688	0.0387252	0.113163	-0.0653658	0.0412627	2.78928e-07	0.218792	0.04259	0.0892801	-0.0497979	0.0293065	8.93444e-10	1.14833e-09	0.0893127	1	0.401287
rs2308953	5:34909062	C:0.084947	rs6585199	10:114765171	G:0.455801	17817	6614	5	1	0.089421	1.24019e-09	0.761945	0.125424	6.19957e-09	-0.150167	0.0258406	1.25109e-06	0.665982	0.13739	1.4303e-09	-0.162567	0.0268615	0.0895505	0.0845002	0.0497712	8.36925e-16	1.36056e-15	0.089421	1	0.401287
rs905293	1:217405444	T:0.274246	rs62026181	16:19506239	T:0.335408	17993	6673	5	1	0.089421	2.92206e-05	-0.116308	0.0278284	2.02552e-05	-0.114701	0.0269121	2.15897e-05	-0.158246	0.0372538	1.12314e-05	-0.150952	0.0343697	0.0892018	0.0684703	0.0402856	1.81391e-08	2.17734e-08	0.089421	1	0.401287
rs1000796	1:217402330	A:0.274228	rs62026181	16:19506239	T:0.335896	18016	6684	5	1	0.089421	3.98837e-05	-0.114241	0.0278085	2.50611e-05	-0.113319	0.0268895	2.75276e-05	-0.156228	0.0372592	1.33465e-05	-0.149542	0.0343432	0.0892403	0.0684114	0.0402558	2.98771e-08	3.54185e-08	0.089421	1	0.401287
chr10:114772253:i	10:114772253	C:0.448866	rs11158715	14:68489386	T:0.305937	17904	6646	5	1	0.0895295	6.88518e-08	-0.139465	0.0258549	0.000145095	0.11024	0.0290158	1.03849e-07	-0.172749	0.0324726	0.161834	0.0587296	0.0419818	0.0895655	0.0606121	0.0357026	4.42719e-10	5.78652e-10	0.0895295	1	0.401287
rs1824332	4:128668850	C:0.477061	rs2308953	5:34909062	C:0.0844807	17939	6657	5	1	0.0895295	6.30874e-07	0.224849	0.0451366	4.72661e-09	0.73466	0.125443	1.31146e-06	0.21893	0.0452521	0.0662038	0.417722	0.227388	0.0916164	0.218033	0.129248	1.25921e-13	1.90572e-13	0.0895295	1	0.401287
rs6604661	1:217409199	T:0.274284	rs2187660	16:19508583	C:0.33831	17985	6673	5	1	0.0895295	3.33183e-05	-0.115479	0.0278295	1.28005e-05	-0.117531	0.0269351	2.40832e-05	-0.15747	0.0372866	7.77273e-06	-0.15375	0.0343856	0.089433	0.068162	0.0401332	1.31162e-08	1.58849e-08	0.0895295	1	0.401287
rs6604661	1:217409199	T:0.274284	rs2187659	16:19508573	A:0.33831	17985	6673	5	1	0.0895295	3.33183e-05	-0.115479	0.0278295	1.28005e-05	-0.117531	0.0269351	2.40832e-05	-0.15747	0.0372866	7.77273e-06	-0.15375	0.0343856	0.089433	0.068162	0.0401332	1.31162e-08	1.58849e-08	0.0895295	1	0.401287
rs117537110	6:30649931	G:0.446419	rs8011527	14:68638685	A:0.320407	18038	6682	5	1	0.0895295	5.08942e-07	0.618596	0.123155	0.000192416	0.113909	0.0305486	2.4234e-07	0.638398	0.123636	7.7498e-05	0.15736	0.0398178	0.089465	-0.0493688	0.0290708	3.4149e-09	4.26888e-09	0.0895295	1	0.401287
rs6585201	10:114768783	G:0.46637	rs11158715	14:68489386	T:0.306748	17886	6640	5	1	0.0895295	9.90751e-09	-0.146348	0.0255305	0.00012432	0.111353	0.0290176	2.9462e-08	-0.18066	0.032583	0.174707	0.0580325	0.0427579	0.0895407	0.0602683	0.0354973	5.30822e-11	7.23865e-11	0.0895295	1	0.401287
rs8011527	14:68638685	A:0.320448	rs2521793	16:19511391	C:0.340768	17889	6629	5	1	0.0895295	0.000251315	0.11229	0.0306725	1.35149e-05	-0.11736	0.0269694	8.60346e-05	0.153373	0.0390568	0.0313712	-0.077161	0.03585	0.0896134	-0.0577289	0.0340094	1.00777e-07	1.15842e-07	0.0895295	1	0.401287
rs11196191	10:114780633	A:0.451593	rs11196205	10:114807047	G:0.456894	17921	6657	5	1	0.0896382	0.561382	-0.0447711	0.0770867	0.198228	-0.0987773	0.0767729	0.815958	0.0199776	0.0858341	0.564003	-0.0474992	0.0823344	0.0897276	-0.059858	0.0352762	2.42936e-07	2.72797e-07	0.0896382	1	0.401287
rs7918599	10:114777396	C:0.450136	rs6573817	14:68617269	G:0.319478	17959	6666	5	1	0.089747	1.21217e-07	-0.136375	0.0257717	0.000141377	0.116158	0.0305218	1.52976e-07	-0.16914	0.0322237	0.129846	0.0649782	0.0428981	0.089668	0.0593622	0.0349776	6.99904e-10	9.07751e-10	0.089747	1	0.401287
rs6585201	10:114768783	G:0.46662	rs12265291	10:114810240	T:0.449485	17975	6663	5	1	0.089965	0.324387	-0.0613865	0.0622908	0.140815	-0.0930739	0.0631967	0.770133	-0.0195431	0.0668824	0.80621	-0.0188268	0.0767442	0.0899979	-0.0597689	0.0352534	2.83978e-08	3.38689e-08	0.089965	1	0.401287
rs6604661	1:217409199	T:0.274297	rs2521791	16:19508824	C:0.338319	17986	6673	5	1	0.0900742	3.26879e-05	-0.115599	0.0278291	1.28333e-05	-0.117518	0.0269356	2.39185e-05	-0.157529	0.037287	7.84557e-06	-0.153683	0.0343859	0.0899129	0.0680614	0.0401339	1.29129e-08	1.57193e-08	0.0900742	1	0.401287
rs3761659	5:131657784	G:0.250623	rs10787472	10:114781297	A:0.452179	18057	6704	5	1	0.0900742	4.30407e-07	-0.180881	0.0357826	2.03181e-07	-0.133161	0.0256257	0.00471919	-0.130931	0.0463373	0.000470176	-0.105838	0.0302638	0.0903125	-0.0521966	0.0308171	2.53165e-12	3.66571e-12	0.0900742	1	0.401287
rs10195178	2:227199263	T:0.427897	chr10:114772253:i	10:114772253	C:0.449045	18016	6680	5	1	0.0902931	2.31715e-06	0.118529	0.025093	1.27562e-07	-0.136101	0.0257655	1.73348e-05	0.170675	0.0397222	0.034468	-0.0843989	0.0399133	0.0902934	-0.0577052	0.0340675	1.14016e-11	1.61076e-11	0.0902931	1	0.401287
rs7918599	10:114777396	C:0.452261	rs11196208	10:114811316	T:0.457158	17868	6628	5	1	0.0904027	0.895581	-0.00995699	0.0758653	0.0744671	-0.134991	0.0756791	0.525454	0.0536495	0.0844926	0.3103	-0.0827535	0.0815633	0.0905318	-0.0597641	0.0353091	1.43234e-07	1.64319e-07	0.0904027	1	0.401287
rs10787473	10:114781400	C:0.452451	rs10860059	12:97046476	G:0.258436	17929	6648	5	1	0.0905125	3.47548e-07	-0.131052	0.0257185	3.4588e-05	-0.119541	0.028868	0.00377679	-0.0958044	0.0330791	0.253687	-0.0546855	0.0479093	0.0907186	-0.0652106	0.0385492	2.66693e-10	3.55292e-10	0.0905125	1	0.401287
rs2308953	5:34909062	C:0.0847638	rs6573817	14:68617269	G:0.319961	17885	6637	5	1	0.0906225	2.47192e-09	0.746252	0.125141	0.000238127	0.112532	0.0306233	8.76407e-10	0.77444	0.126327	5.69784e-05	0.130175	0.0323416	0.0909556	-0.0806892	0.0477344	2.57945e-11	3.60018e-11	0.0906225	1	0.401287
rs1502364	1:217392174	G:0.274538	rs2074172	16:19529042	A:0.340001	17972	6662	5	1	0.0908428	2.81355e-05	-0.116541	0.0278271	1.46866e-05	-0.116844	0.0269639	2.19109e-05	-0.158535	0.037351	8.82251e-06	-0.152932	0.0344117	0.0906962	0.067866	0.0401162	1.27749e-08	1.56595e-08	0.0908428	1	0.401287
rs905293	1:217405444	T:0.274474	rs2856611	16:19507199	G:0.338108	17978	6666	5	1	0.0908428	3.2746e-05	-0.115582	0.0278277	1.3088e-05	-0.117411	0.0269376	2.43064e-05	-0.157439	0.0372976	8.10028e-06	-0.153539	0.0344063	0.0907029	0.0679162	0.0401467	1.31676e-08	1.61289e-08	0.0908428	1	0.401287
rs6604661	1:217409199	T:0.274262	rs2856614	16:19512116	T:0.338441	17981	6667	5	1	0.0909532	3.36006e-05	-0.11545	0.0278355	1.62915e-05	-0.11613	0.0269415	2.47937e-05	-0.157298	0.0373038	9.63331e-06	-0.152216	0.0343973	0.0907832	0.0678947	0.0401439	1.66616e-08	2.03109e-08	0.0909532	1	0.401287
rs6604661	1:217409199	T:0.274262	rs1134662	16:19510249	G:0.338441	17981	6667	5	1	0.0909532	3.36006e-05	-0.11545	0.0278355	1.62915e-05	-0.11613	0.0269415	2.47937e-05	-0.157298	0.0373038	9.63331e-06	-0.152216	0.0343973	0.0907832	0.0678947	0.0401439	1.66616e-08	2.03109e-08	0.0909532	1	0.401287
rs1000796	1:217402330	A:0.274457	rs2856611	16:19507199	G:0.338592	18001	6677	5	1	0.0910637	4.45722e-05	-0.113522	0.0278077	1.63018e-05	-0.116012	0.026915	3.10018e-05	-0.155403	0.0373029	9.69438e-06	-0.152092	0.0343798	0.0909257	0.06782	0.0401175	2.17734e-08	2.6392e-08	0.0910637	1	0.401287
rs7708975	5:132650567	T:0.0959703	rs10885405	10:114777670	C:0.461423	18016	6681	5	1	0.0910637	0.000159968	-0.162462	0.0430355	1.89862e-07	-0.132238	0.0253865	0.000153486	-0.242178	0.0639774	4.66215e-08	-0.149086	0.0272864	0.0907668	0.0983317	0.0581374	8.28725e-10	1.08331e-09	0.0910637	1	0.401287
rs3761659	5:131657784	G:0.250553	rs12288760	11:56333753	C:0.169155	18084	6706	5	1	0.0911744	3.45912e-07	-0.182072	0.0357246	3.35901e-05	-0.139511	0.033636	8.11157e-08	-0.203641	0.03796	1.07089e-05	-0.175091	0.0397723	0.0910183	0.0709015	0.0419523	3.53311e-10	4.70665e-10	0.0911744	1	0.401287
rs1532716	1:217402689	A:0.274599	rs2074172	16:19529042	A:0.340021	17968	6664	5	1	0.0911744	4.66941e-05	-0.113273	0.0278203	1.56141e-05	-0.116443	0.0269554	3.23758e-05	-0.155234	0.037351	9.36069e-06	-0.152533	0.0344207	0.091064	0.0677643	0.0401017	2.19227e-08	2.65938e-08	0.0911744	1	0.401287
rs7918599	10:114777396	C:0.449576	rs10885406	10:114777724	A:0.452182	18037	6688	5	1	0.0912852	0.165804	-0.307051	0.221567	0.441637	0.169836	0.22073	0.348106	-0.214099	0.228185	0.382798	0.192923	0.221052	0.0912099	-0.0598015	0.0354054	4.24703e-07	4.76018e-07	0.0912852	1	0.401287
chr10:114772253:i	10:114772253	C:0.449679	rs6573817	14:68617269	G:0.318689	17925	6649	5	1	0.0912852	1.4316e-07	-0.135842	0.0258198	0.000127408	0.117183	0.0305849	1.77951e-07	-0.168451	0.0322641	0.12393	0.0661411	0.042991	0.0912561	0.0592358	0.0350755	7.68694e-10	1.00838e-09	0.0912852	1	0.401287
rs3821757	3:10948564	G:0.485185	rs10885406	10:114777724	A:0.452604	17955	6631	5	1	0.0912852	2.99497e-06	-0.149361	0.0319751	1.97056e-07	-0.133683	0.0256979	0.00494778	-0.11062	0.0393607	0.00961283	-0.0921191	0.0355747	0.0913552	-0.0458788	0.0271747	2.10529e-11	2.96651e-11	0.0912852	1	0.401287
rs8011527	14:68638685	A:0.320284	rs1475962	16:19503598	C:0.338333	18034	6682	5	1	0.0912852	0.000197838	0.113577	0.0305171	1.35679e-05	-0.116987	0.0268889	7.10819e-05	0.153939	0.0387499	0.0310476	-0.0770965	0.0357514	0.0913179	-0.0571223	0.0338305	7.98774e-08	9.38076e-08	0.0912852	1	0.401287
rs8011527	14:68638685	A:0.320284	rs1967952	16:19503828	T:0.338333	18034	6682	5	1	0.0912852	0.000197838	0.113577	0.0305171	1.35679e-05	-0.116987	0.0268889	7.10819e-05	0.153939	0.0387499	0.0310476	-0.0770965	0.0357514	0.0913179	-0.0571223	0.0338305	7.98774e-08	9.38076e-08	0.0912852	1	0.401287
rs2943645	2:227099180	C:0.35596	rs10195178	2:227199263	T:0.427787	18120	6719	5	1	0.0913961	8.21227e-05	-0.112229	0.0284982	0.010458	0.0713296	0.0278598	0.0721156	-0.0689077	0.0383164	0.00222472	0.107355	0.0351008	0.0914046	-0.0657554	0.0389538	4.29581e-09	5.42924e-09	0.0913961	1	0.401287
rs7708975	5:132650567	T:0.0959147	chr10:114772253:i	10:114772253	C:0.449045	18016	6680	5	1	0.0913961	0.000164611	-0.162126	0.043028	1.35962e-07	-0.135763	0.0257584	0.000133973	-0.237877	0.0622871	3.27969e-08	-0.151921	0.027493	0.091048	0.0986911	0.0584007	6.23116e-10	8.21855e-10	0.0913961	1	0.401287
rs3821757	3:10948564	G:0.485636	rs10787473	10:114781400	C:0.452789	17962	6642	5	1	0.0915072	3.22857e-06	-0.14888	0.031978	1.69447e-07	-0.134352	0.0256885	0.0051525	-0.110134	0.0393709	0.00911943	-0.0927772	0.0355803	0.0915014	-0.0458495	0.0271696	1.93759e-11	2.73965e-11	0.0915072	1	0.401287
rs6585199	10:114765171	G:0.456985	rs7904519	10:114773927	A:0.450053	17889	6640	5	1	0.0917299	0.12063	-0.198529	0.127907	0.668792	0.0548516	0.128216	0.205045	-0.164083	0.129474	0.317774	0.136957	0.137089	0.0916724	-0.0599952	0.0355708	1.15881e-07	1.35245e-07	0.0917299	1	0.401287
rs3761659	5:131657784	G:0.250581	rs11228658	11:56335596	T:0.169174	18082	6705	5	1	0.0918415	3.50137e-07	-0.181989	0.0357244	3.44498e-05	-0.139318	0.0336367	8.25941e-08	-0.203518	0.0379601	1.10403e-05	-0.174831	0.039773	0.0916466	0.0707646	0.0419526	3.66311e-10	4.90423e-10	0.0918415	1	0.401287
rs7918599	10:114777396	C:0.451751	rs11196205	10:114807047	G:0.456833	17907	6647	5	1	0.0919532	0.676884	-0.0317972	0.0763039	0.146079	-0.11055	0.0760564	0.706904	0.0319612	0.0849994	0.469975	-0.0590963	0.081792	0.0919752	-0.0594346	0.0352713	2.93323e-07	3.34205e-07	0.0919532	1	0.401287
rs3821757	3:10948564	G:0.485011	rs2856609	16:19506773	G:0.338061	18013	6655	5	1	0.092065	3.24165e-06	-0.148624	0.0319287	1.74225e-05	-0.115577	0.0269058	1.53086e-06	-0.184271	0.0383326	3.15991e-05	-0.163863	0.0393749	0.0921304	0.0492861	0.0292627	1.7188e-09	2.23048e-09	0.092065	1	0.401287
rs3821757	3:10948564	G:0.485011	rs2856610	16:19507031	T:0.338061	18013	6655	5	1	0.092065	3.24165e-06	-0.148624	0.0319287	1.74225e-05	-0.115577	0.0269058	1.53086e-06	-0.184271	0.0383326	3.15991e-05	-0.163863	0.0393749	0.0921304	0.0492861	0.0292627	1.7188e-09	2.23048e-09	0.092065	1	0.401287
rs117537110	6:30649931	G:0.448421	rs12258200	10:114781698	T:0.449446	18050	6699	5	1	0.092065	5.31352e-07	0.618168	0.123273	5.58703e-08	-0.139785	0.0257359	5.58855e-06	0.572553	0.126074	9.52339e-08	-0.172969	0.0324179	0.0919164	0.0440458	0.0261341	1.31469e-12	1.95846e-12	0.092065	1	0.401287
rs7708975	5:132650567	T:0.0959854	rs6585202	10:114782803	T:0.461683	18034	6700	5	1	0.092065	0.000242345	-0.157685	0.0429635	1.62776e-07	-0.132834	0.0253622	0.00020747	-0.237186	0.0639359	4.06336e-08	-0.149656	0.0272693	0.0917495	0.0979152	0.0580672	1.05996e-09	1.39014e-09	0.092065	1	0.401287
rs8011527	14:68638685	A:0.320266	rs1475963	16:19505282	G:0.338314	18035	6684	5	1	0.092177	0.000204549	0.113318	0.0305164	1.31628e-05	-0.117163	0.0268885	7.40002e-05	0.153563	0.0387487	0.0304044	-0.0773904	0.0357497	0.0922426	-0.056957	0.0338288	8.00335e-08	9.47035e-08	0.092177	1	0.401287
rs3821757	3:10948564	G:0.485013	rs4421962	16:19505852	C:0.338107	18015	6656	5	1	0.092177	3.27232e-06	-0.148553	0.0319268	1.64691e-05	-0.115907	0.0269046	1.5451e-06	-0.184193	0.0383312	3.04876e-05	-0.164185	0.039375	0.0921987	0.0492764	0.0292631	1.64169e-09	2.13462e-09	0.092177	1	0.401287
rs12258200	10:114781698	T:0.452093	rs12718338	10:114813047	C:0.457739	17889	6640	5	1	0.092177	0.877823	-0.011804	0.0767844	0.0787679	-0.134489	0.0765066	0.538811	0.0526166	0.0856095	0.308068	-0.083657	0.0820743	0.0922335	-0.0594519	0.0353096	1.05099e-07	1.23456e-07	0.092177	1	0.401287
rs8011527	14:68638685	A:0.320266	rs1475964	16:19505406	T:0.338314	18035	6684	5	1	0.092177	0.000204549	0.113318	0.0305164	1.31628e-05	-0.117163	0.0268885	7.40002e-05	0.153563	0.0387487	0.0304044	-0.0773904	0.0357497	0.0922426	-0.056957	0.0338288	8.00335e-08	9.47035e-08	0.092177	1	0.401287
rs8011527	14:68638685	A:0.320266	rs2245423	16:19505730	T:0.338314	18035	6684	5	1	0.092177	0.000204549	0.113318	0.0305164	1.31628e-05	-0.117163	0.0268885	7.40002e-05	0.153563	0.0387487	0.0304044	-0.0773904	0.0357497	0.0922426	-0.056957	0.0338288	8.00335e-08	9.47035e-08	0.092177	1	0.401287
rs8011527	14:68638685	A:0.320266	rs4421962	16:19505852	C:0.338314	18035	6684	5	1	0.092177	0.000204549	0.113318	0.0305164	1.31628e-05	-0.117163	0.0268885	7.40002e-05	0.153563	0.0387487	0.0304044	-0.0773904	0.0357497	0.0922426	-0.056957	0.0338288	8.00335e-08	9.47035e-08	0.092177	1	0.401287
rs3821757	3:10948564	G:0.485013	rs2245423	16:19505730	T:0.338107	18015	6656	5	1	0.092177	3.27232e-06	-0.148553	0.0319268	1.64691e-05	-0.115907	0.0269046	1.5451e-06	-0.184193	0.0383312	3.04876e-05	-0.164185	0.039375	0.0921987	0.0492764	0.0292631	1.64169e-09	2.13462e-09	0.092177	1	0.401287
rs3821757	3:10948564	G:0.485013	rs1475963	16:19505282	G:0.338107	18015	6656	5	1	0.092177	3.27232e-06	-0.148553	0.0319268	1.64691e-05	-0.115907	0.0269046	1.5451e-06	-0.184193	0.0383312	3.04876e-05	-0.164185	0.039375	0.0921987	0.0492764	0.0292631	1.64169e-09	2.13462e-09	0.092177	1	0.401287
rs3821757	3:10948564	G:0.485013	rs1475964	16:19505406	T:0.338107	18015	6656	5	1	0.092177	3.27232e-06	-0.148553	0.0319268	1.64691e-05	-0.115907	0.0269046	1.5451e-06	-0.184193	0.0383312	3.04876e-05	-0.164185	0.039375	0.0921987	0.0492764	0.0292631	1.64169e-09	2.13462e-09	0.092177	1	0.401287
rs117537110	6:30649931	G:0.447287	chr10:114772253:i	10:114772253	C:0.449008	18003	6673	5	1	0.0922891	5.12156e-07	0.620135	0.123491	1.1469e-07	-0.13668	0.0257802	5.32085e-06	0.574692	0.126258	1.65893e-07	-0.169797	0.0324412	0.0922606	0.0441027	0.0261956	2.47784e-12	3.65868e-12	0.0922891	1	0.401287
rs12255372	10:114808902	T:0.284818	rs4148423	13:95931595	C:0.478272	18087	6703	5	1	0.0922891	4.97244e-16	0.218718	0.0269618	4.38888e-07	0.232799	0.0460872	4.71857e-06	0.173768	0.037966	2.13897e-05	0.206649	0.0486247	0.0923618	0.0456119	0.0271005	9.53222e-21	1.81627e-20	0.0922891	1	0.401287
rs3761659	5:131657784	G:0.250636	rs7483053	11:56340724	T:0.169231	18070	6700	5	1	0.0924014	3.55496e-07	-0.181891	0.0357253	3.30513e-05	-0.139683	0.0336476	8.43805e-08	-0.203393	0.0379642	1.07299e-05	-0.175144	0.0397881	0.0922941	0.0706386	0.0419614	3.5643e-10	4.79754e-10	0.0924014	1	0.401287
rs905293	1:217405444	T:0.274611	rs2074172	16:19529042	A:0.339573	17949	6654	5	1	0.0925139	3.39143e-05	-0.115424	0.0278435	1.16451e-05	-0.118265	0.0269758	2.57356e-05	-0.157194	0.0373538	7.5334e-06	-0.154245	0.0344447	0.0922522	0.0675714	0.0401342	1.21661e-08	1.51458e-08	0.0925139	1	0.401287
rs6585202	10:114782803	T:0.461714	rs12265291	10:114810240	T:0.450275	18009	6689	5	1	0.0925139	0.770305	0.0200364	0.0686234	0.0155458	-0.168683	0.0697209	0.391019	0.0626265	0.0730108	0.235193	-0.0968598	0.0815945	0.0925658	-0.0590538	0.035109	4.31748e-08	5.20719e-08	0.0925139	1	0.401287
rs8011527	14:68638685	A:0.319666	rs2856611	16:19507199	G:0.338071	18011	6675	5	1	0.0926264	0.000221577	0.112757	0.0305322	1.44593e-05	-0.116712	0.0269121	7.97443e-05	0.153039	0.0387914	0.0312748	-0.0770081	0.0357585	0.0926185	-0.0569505	0.033864	9.5135e-08	1.12479e-07	0.0926264	1	0.401287
rs1562692	3:34534267	G:0.121424	rs4646591	15:58303002	G:0.476076	18036	6694	5	1	0.0926264	4.82895e-05	0.223513	0.0550016	1.18438e-06	0.188494	0.0387988	0.139073	0.121556	0.0821737	9.05932e-06	0.175526	0.0395463	0.092934	0.0933716	0.0555744	2.63368e-09	3.40146e-09	0.0926264	1	0.401287
rs7972359	12:106264199	G:0.338848	rs6573817	14:68617269	G:0.319111	18011	6681	5	1	0.0927392	2.06888e-05	0.110523	0.0259606	0.00012741	0.116882	0.0305063	1.41425e-05	0.147224	0.0339097	5.214e-05	0.157612	0.0389568	0.0927585	-0.0609458	0.0362552	8.65369e-08	1.02672e-07	0.0927392	1	0.401469
rs6677242	1:217398785	A:0.276091	rs2856611	16:19507199	G:0.338246	17947	6658	5	1	0.0930783	3.48888e-05	-0.115042	0.0277949	1.2074e-05	-0.117985	0.0269602	2.65462e-05	-0.156649	0.0372863	7.97338e-06	-0.154066	0.0344984	0.0929318	0.0674527	0.0401473	1.31162e-08	1.63767e-08	0.0930783	1	0.402505
rs11196191	10:114780633	A:0.452038	rs12718338	10:114813047	C:0.457795	17889	6641	5	1	0.0931916	0.875787	-0.0119956	0.0767413	0.0787402	-0.134437	0.0764699	0.540866	0.0523444	0.0855994	0.306659	-0.0838458	0.0820201	0.0931993	-0.0592843	0.0353144	1.02265e-07	1.21248e-07	0.0931916	1	0.402505
chr10:114772253:i	10:114772253	C:0.449716	rs8011527	14:68638685	A:0.319896	17948	6649	5	1	0.0931916	1.0764e-07	-0.137159	0.0258142	0.000157661	0.115589	0.0305898	1.47365e-07	-0.169598	0.0322687	0.130506	0.0649507	0.0429537	0.0932142	0.0587562	0.0350014	7.1162e-10	9.50366e-10	0.0931916	1	0.402505
rs1502364	1:217392174	G:0.274124	rs1532716	1:217402689	A:0.27429	18032	6686	5	1	0.0934187	0.348702	-1.07554	1.14772	0.402796	0.960145	1.14762	0.304479	-1.18037	1.14948	0.407413	0.950814	1.1477	0.0930228	0.0722973	0.0430427	0.00010987	0.000102943	0.0934187	1	0.403121
rs3821757	3:10948564	G:0.484984	rs1475962	16:19503598	C:0.338126	18014	6654	5	1	0.0936464	3.18253e-06	-0.148745	0.0319287	1.69718e-05	-0.115729	0.026905	1.54038e-06	-0.184225	0.0383328	3.18649e-05	-0.163792	0.0393757	0.0936791	0.0490548	0.0292637	1.6449e-09	2.16541e-09	0.0936464	1	0.403121
rs3821757	3:10948564	G:0.484984	rs1967952	16:19503828	T:0.338126	18014	6654	5	1	0.0936464	3.18253e-06	-0.148745	0.0319287	1.69718e-05	-0.115729	0.026905	1.54038e-06	-0.184225	0.0383328	3.18649e-05	-0.163792	0.0393757	0.0936791	0.0490548	0.0292637	1.6449e-09	2.16541e-09	0.0936464	1	0.403121
rs6585201	10:114768783	G:0.466635	rs7918599	10:114777396	C:0.449911	17938	6652	5	1	0.0936464	0.128357	-0.138525	0.091098	0.959969	-0.00462413	0.092128	0.222695	-0.112602	0.0923429	0.419486	0.0862161	0.106794	0.0936188	-0.0598722	0.0357103	1.41151e-07	1.66518e-07	0.0936464	1	0.403121
rs6997996	8:25891653	G:0.277547	rs11196208	10:114811316	T:0.457313	17851	6596	5	1	0.0937605	8.34342e-05	-0.110105	0.0279858	3.53806e-08	-0.142211	0.025798	0.000145958	-0.166656	0.0438817	7.73546e-08	-0.175952	0.0327463	0.0936344	0.0634302	0.0378342	6.23023e-11	8.78375e-11	0.0937605	1	0.403121
rs6585199	10:114765171	G:0.456424	rs1729752	13:95732362	G:0.298268	17957	6663	5	1	0.0937605	1.78338e-08	-0.144954	0.0257386	7.19093e-08	-0.167997	0.0311896	0.000149688	-0.116665	0.0307695	0.00160127	-0.126099	0.0399595	0.0938939	-0.0502417	0.0299914	4.37727e-14	6.98339e-14	0.0937605	1	0.403121
rs3821757	3:10948564	G:0.484426	rs7896811	10:114766717	T:0.139637	18011	6650	5	1	0.0938748	3.53595e-06	-0.147961	0.031909	9.92673e-06	-0.157618	0.0356701	8.34379e-07	-0.16541	0.0335712	1.93198e-05	-0.218783	0.0512058	0.0938225	0.0662367	0.0395309	1.05068e-09	1.39947e-09	0.0938748	1	0.403186
rs1000796	1:217402330	A:0.274609	rs2074172	16:19529042	A:0.340076	17971	6664	5	1	0.0939892	4.65983e-05	-0.113298	0.0278232	1.53626e-05	-0.116541	0.0269557	3.37111e-05	-0.154926	0.0373601	9.6263e-06	-0.152333	0.0344224	0.0938077	0.0672032	0.0401059	2.14987e-08	2.67207e-08	0.0939892	1	0.403186
rs12258200	10:114781698	T:0.449666	rs10860059	12:97046476	G:0.258445	17940	6653	5	1	0.0939892	1.43295e-07	-0.135839	0.0258201	3.76816e-05	-0.118942	0.0288607	0.00241251	-0.100793	0.0332202	0.248696	-0.0550846	0.0477534	0.0941432	-0.0644876	0.0385245	1.24024e-10	1.72846e-10	0.0939892	1	0.403186
rs7821832	8:25889446	G:0.30208	rs1555944	14:68625118	G:0.321364	17838	6603	5	1	0.0941037	0.000462019	-0.0967453	0.0276268	0.000195978	0.113873	0.030577	0.137792	-0.0551043	0.0371307	6.2823e-05	0.15061	0.0376342	0.0942412	-0.0599101	0.0358006	1.85024e-06	2.02979e-06	0.0941037	1	0.403373
rs7918599	10:114777396	C:0.449648	rs7972359	12:106264199	G:0.338463	18033	6689	5	1	0.0943332	6.83053e-08	-0.138809	0.0257265	2.89499e-05	0.108468	0.0259395	4.40381e-07	-0.180013	0.0356419	0.188203	0.0544848	0.0414046	0.0942547	0.0593456	0.0354647	8.2135e-11	1.15732e-10	0.0943332	1	0.404051
rs12718338	10:114813047	C:0.4571	rs11158715	14:68489386	T:0.303499	17832	6620	5	1	0.0945634	7.71203e-09	-0.148994	0.0258015	0.000159913	0.109991	0.0291356	2.24802e-08	-0.1822	0.0325837	0.175884	0.0577987	0.0427019	0.0945323	0.0600514	0.0359168	6.12167e-11	8.6917e-11	0.0945634	1	0.404731
rs7918599	10:114777396	C:0.4502	rs8011527	14:68638685	A:0.320737	17982	6666	5	1	0.0946787	8.93505e-08	-0.137761	0.0257634	0.000198862	0.113601	0.0305341	1.31521e-07	-0.170055	0.0322274	0.139763	0.0632998	0.0428664	0.0946767	0.0583056	0.0348879	7.20712e-10	9.74277e-10	0.0946787	1	0.404919
rs3821757	3:10948564	G:0.484826	rs2856611	16:19507199	G:0.337863	17991	6647	5	1	0.0950255	2.11136e-06	-0.151627	0.0319722	1.79941e-05	-0.115482	0.0269288	1.09824e-06	-0.186943	0.0383618	3.35633e-05	-0.163309	0.0393721	0.0949885	0.0488711	0.0292703	1.18594e-09	1.5906e-09	0.0950255	1	0.40598
rs117537110	6:30649931	G:0.448427	rs11196191	10:114780633	A:0.449341	18052	6700	5	1	0.0951414	5.31736e-07	0.618176	0.123278	5.5124e-08	-0.139841	0.0257347	5.50013e-06	0.573	0.12608	9.92398e-08	-0.172699	0.0324127	0.0950376	0.0436288	0.0261344	1.30064e-12	1.98878e-12	0.0951414	1	0.40598
rs3761659	5:131657784	G:0.249584	rs10885406	10:114777724	A:0.452084	18042	6688	5	1	0.0951414	3.37582e-07	-0.182621	0.0357998	2.18378e-07	-0.132893	0.0256404	0.00403868	-0.133354	0.0463819	0.000455949	-0.106056	0.0302552	0.0953579	-0.0514993	0.0308788	2.14021e-12	3.24503e-12	0.0951414	1	0.40598
rs7904519	10:114773927	A:0.450217	rs7972359	12:106264199	G:0.338849	18008	6677	5	1	0.0952575	5.93182e-08	-0.139522	0.0257381	4.60348e-05	0.105786	0.0259603	4.12004e-07	-0.18071	0.0356899	0.211948	0.0517918	0.0414923	0.0951624	0.0593071	0.0355394	1.12375e-10	1.58579e-10	0.0952575	1	0.406169
rs10195178	2:227199263	T:0.427973	rs7899529	10:114779538	G:0.452481	18035	6688	5	1	0.0957233	1.9236e-06	0.119335	0.0250637	3.27095e-07	-0.130977	0.0256458	1.79058e-05	0.170904	0.0398422	0.0426011	-0.08047	0.0396873	0.0958273	-0.05664	0.0340093	2.24984e-11	3.28688e-11	0.0957233	1	0.406872
rs10885409	10:114808072	T:0.456678	rs11196208	10:114811316	T:0.456734	17924	6650	5	1	0.0957233	0.501381	-0.30142	0.44833	0.725577	0.157377	0.448349	0.592363	-0.240733	0.449619	0.638844	0.21087	0.449314	0.0956828	-0.0588685	0.0353319	1.30926e-07	1.57444e-07	0.0957233	1	0.406872
rs3821757	3:10948564	G:0.485013	rs2353696	16:19505813	T:0.338163	18015	6656	5	1	0.0959571	3.27826e-06	-0.148542	0.0319268	1.52516e-05	-0.116375	0.0269073	1.63171e-06	-0.183784	0.0383331	3.07701e-05	-0.164102	0.0393749	0.0959527	0.0487217	0.0292658	1.52426e-09	2.04873e-09	0.0959571	1	0.406872
rs10195178	2:227199263	T:0.427871	rs7918599	10:114777396	C:0.449532	18051	6697	5	1	0.0960743	1.38102e-06	0.120997	0.025063	1.00236e-07	-0.136971	0.0257159	1.42192e-05	0.172127	0.0396565	0.0300613	-0.0863456	0.0398038	0.0960856	-0.0565273	0.033968	5.33862e-12	8.02839e-12	0.0960743	1	0.406872
rs10885405	10:114777670	C:0.461453	rs12265291	10:114810240	T:0.450364	17991	6670	5	1	0.0960743	0.779413	0.0192741	0.0688152	0.0168272	-0.1671	0.069903	0.398843	0.0618122	0.0732641	0.237772	-0.0963832	0.081641	0.096187	-0.0584433	0.03513	5.39423e-08	6.6618e-08	0.0960743	1	0.406872
rs6677242	1:217398785	A:0.276246	rs2074172	16:19529042	A:0.339733	17917	6645	5	1	0.0960743	3.64535e-05	-0.114826	0.0278104	1.13813e-05	-0.11851	0.0270009	2.88984e-05	-0.15617	0.0373436	7.93295e-06	-0.154294	0.0345409	0.0959392	0.0668204	0.0401356	1.29508e-08	1.65808e-08	0.0960743	1	0.406872
rs11196191	10:114780633	A:0.44956	rs10860059	12:97046476	G:0.2585	17942	6654	5	1	0.0961916	1.41178e-07	-0.135903	0.0258189	3.7241e-05	-0.119017	0.0288598	0.00234352	-0.101088	0.0332214	0.244052	-0.0556138	0.0477405	0.0963696	-0.0640427	0.038517	1.21151e-10	1.72021e-10	0.0961916	1	0.406872
rs8011527	14:68638685	A:0.320191	rs2856609	16:19506773	G:0.338269	18033	6683	5	1	0.0961916	0.000204618	0.113322	0.0305183	1.3972e-05	-0.116817	0.0268897	7.80055e-05	0.153083	0.0387507	0.0301201	-0.0775253	0.0357505	0.0962374	-0.0562836	0.033837	8.46148e-08	1.03357e-07	0.0961916	1	0.406872
rs10787472	10:114781297	A:0.452361	rs10860059	12:97046476	G:0.258432	17937	6653	5	1	0.0961916	3.78048e-07	-0.130616	0.0257134	3.04136e-05	-0.120382	0.0288662	0.00371316	-0.0959695	0.0330752	0.237103	-0.0566382	0.0479067	0.0963554	-0.064095	0.0385468	2.55976e-10	3.58022e-10	0.0961916	1	0.406872
rs8011527	14:68638685	A:0.320191	rs2856610	16:19507031	T:0.338269	18033	6683	5	1	0.0961916	0.000204618	0.113322	0.0305183	1.3972e-05	-0.116817	0.0268897	7.80055e-05	0.153083	0.0387507	0.0301201	-0.0775253	0.0357505	0.0962374	-0.0562836	0.033837	8.46148e-08	1.03357e-07	0.0961916	1	0.406872
rs7918599	10:114777396	C:0.452198	rs12718338	10:114813047	C:0.457765	17876	6632	5	1	0.0963091	0.957704	-0.00402751	0.0759398	0.0625673	-0.141027	0.0757293	0.484819	0.0592097	0.0847581	0.266914	-0.0904235	0.0814481	0.0963208	-0.0587185	0.0353097	1.27893e-07	1.54628e-07	0.0963091	1	0.406872
rs2943645	2:227099180	C:0.356065	rs17866193	4:118392862	C:0.442348	18022	6676	5	1	0.0963091	5.56748e-08	-0.139481	0.0256769	3.97573e-06	0.117364	0.025444	0.0350996	-0.0863169	0.0409627	7.62953e-06	0.158108	0.0353288	0.0963782	-0.0591156	0.0355546	7.94408e-12	1.18852e-11	0.0963091	1	0.406872
rs2713539	2:227137125	T:0.346821	rs10195178	2:227199263	T:0.427881	18116	6718	5	1	0.0964267	9.68049e-05	-0.114134	0.0292767	0.021086	0.0657543	0.028509	0.0526188	-0.0737028	0.0380296	0.00448245	0.0987191	0.0347352	0.0965286	-0.0659707	0.0396954	5.61923e-09	7.36016e-09	0.0964267	1	0.406872
rs3821757	3:10948564	G:0.485807	rs6585200	10:114768609	A:0.454152	17896	6617	5	1	0.0964267	5.49148e-06	-0.145635	0.0320424	9.68948e-09	-0.148463	0.0258823	0.00645066	-0.107427	0.0394378	0.00260092	-0.107532	0.0357088	0.0964289	-0.0452764	0.0272353	1.95822e-12	3.00516e-12	0.0964267	1	0.406872
rs6585199	10:114765171	G:0.456838	rs6585201	10:114768783	G:0.466129	17921	6645	5	1	0.0966624	0.464526	-0.0915165	0.125123	0.650829	-0.056074	0.12389	0.991972	0.00137845	0.136995	0.786507	-0.0337412	0.124576	0.0967544	-0.0590077	0.0355298	7.30138e-08	8.98797e-08	0.0966624	1	0.40726
rs12265291	10:114810240	T:0.449378	rs4646362	17:17468641	C:0.496821	18085	6707	5	1	0.0966624	1.09983e-08	-0.1473	0.0257762	1.53464e-06	-0.175283	0.0364665	0.0021239	-0.107762	0.035075	0.00105819	-0.139128	0.0424873	0.0967676	-0.0431689	0.0259939	6.16784e-13	9.66861e-13	0.0966624	1	0.40726
rs10885405	10:114777670	C:0.461468	rs10860059	12:97046476	G:0.258634	17894	6629	5	1	0.0968987	3.11632e-07	-0.130439	0.0254948	2.38886e-05	-0.122059	0.0288893	0.00330767	-0.0962413	0.0327619	0.231111	-0.0577686	0.0482409	0.0970062	-0.0640833	0.038615	1.65271e-10	2.34558e-10	0.0968987	1	0.407728
rs10195178	2:227199263	T:0.427815	rs11771062	7:155557706	C:0.237942	18120	6719	5	1	0.0970171	1.38466e-06	0.120761	0.0250167	0.000169295	0.108058	0.0287318	0.00440626	0.0893435	0.031376	0.254604	0.0510645	0.0448234	0.0971576	0.0669783	0.0403778	8.27231e-09	1.0788e-08	0.0970171	1	0.407728
rs2308953	5:34909062	C:0.0847762	rs10746051	12:106256437	C:0.325993	17847	6619	5	1	0.0971357	6.22884e-09	0.733063	0.126162	1.10437e-05	0.116172	0.0264288	2.96833e-07	0.673738	0.13145	0.000179623	0.103254	0.0275634	0.0980189	0.0837124	0.0505958	3.58068e-12	5.46961e-12	0.0971357	1	0.407728
rs6585199	10:114765171	G:0.456529	rs7972359	12:106264199	G:0.338266	17943	6658	5	1	0.0971357	8.74424e-09	-0.148078	0.0257372	3.07862e-05	0.108492	0.0260323	1.22307e-07	-0.189209	0.0357671	0.197897	0.0539857	0.0419285	0.0971278	0.0590289	0.0355823	1.30083e-11	1.94192e-11	0.0971357	1	0.407728
rs1522812	2:226997454	A:0.360199	rs6436602	2:227005350	G:0.364205	17972	6638	5	1	0.0972544	0.341431	0.179237	0.188404	0.708344	-0.0703038	0.187937	0.173417	0.266078	0.195458	0.819425	-0.0430496	0.188579	0.0973484	-0.0623363	0.0376008	0.000198367	0.000186667	0.0972544	1	0.407728
rs117537110	6:30649931	G:0.445763	rs4149477	22:26931305	C:0.4818	17995	6680	5	1	0.0972544	5.06543e-07	0.622087	0.123828	4.93973e-08	0.257123	0.0471485	0.05451	0.370381	0.19263	1.91367e-07	0.247144	0.0474589	0.0942642	0.171762	0.102647	5.8282e-13	9.18871e-13	0.0972544	1	0.407728
rs57225583	10:114771843	G:0.141358	rs4919764	12:53272051	G:0.428054	17958	6663	5	1	0.0973733	1.54428e-05	-0.153638	0.0355456	3.1757e-06	0.118949	0.0255303	5.86959e-05	-0.224808	0.0559503	0.000868834	0.0963544	0.0289363	0.0974906	0.0830479	0.0501151	1.52277e-09	2.07037e-09	0.0973733	1	0.407728
rs3821757	3:10948564	G:0.48581	rs10787472	10:114781297	A:0.452699	17970	6647	5	1	0.0974923	3.01409e-06	-0.149329	0.0319772	1.84625e-07	-0.133918	0.0256833	0.00469657	-0.111297	0.0393672	0.00888379	-0.0930934	0.0355794	0.0975622	-0.0450065	0.0271649	1.97195e-11	2.92978e-11	0.0974923	1	0.407728
rs6585200	10:114768609	A:0.455877	rs10885409	10:114808072	T:0.456634	17848	6628	5	1	0.0974923	0.0992914	-0.115216	0.0698998	0.63046	-0.0334761	0.0695854	0.461424	-0.0574122	0.0779522	0.77372	0.0221694	0.0771076	0.097529	-0.0584109	0.035252	9.34773e-08	1.15074e-07	0.0974923	1	0.407728
rs10195178	2:227199263	T:0.427815	rs11765009	7:155556014	A:0.237914	18120	6719	5	1	0.0974923	1.38583e-06	0.120757	0.0250167	0.000162792	0.108341	0.0287323	0.00438871	0.0893821	0.0313756	0.251258	0.0514247	0.0448225	0.097597	0.0668899	0.0403774	7.97096e-09	1.04439e-08	0.0974923	1	0.407728
rs7918599	10:114777396	C:0.449667	rs10787473	10:114781400	C:0.452302	18030	6686	5	1	0.0976115	0.121006	-0.341934	0.220523	0.351077	0.204869	0.219698	0.269921	-0.250658	0.227201	0.301318	0.22743	0.220034	0.0975889	-0.0586599	0.0354086	3.73703e-07	4.42928e-07	0.0976115	1	0.407926
rs3761659	5:131657784	G:0.250806	rs6585201	10:114768783	G:0.46652	17996	6672	5	1	0.0979701	6.11602e-07	-0.178884	0.0358664	1.70301e-08	-0.143575	0.0254577	0.00582015	-0.129072	0.0468033	9.92249e-05	-0.117051	0.0300712	0.0981109	-0.0509955	0.0308301	3.2534e-13	5.20797e-13	0.0979701	1	0.409123
rs1502364	1:217392174	G:0.274081	rs905293	1:217405444	T:0.274275	18002	6673	5	1	0.0983301	0.36334	-0.96939	1.06641	0.423686	0.853037	1.06624	0.315616	-1.07027	1.06653	0.429377	0.841333	1.06463	0.0980414	0.0713089	0.043102	0.000103314	0.000100943	0.0983301	1	0.409721
rs6585200	10:114768609	A:0.453723	rs7972359	12:106264199	G:0.338157	17968	6668	5	1	0.0983301	6.18162e-09	-0.150074	0.0258224	3.74736e-05	0.107216	0.0260074	9.41492e-08	-0.190907	0.0357661	0.200635	0.0533613	0.0416968	0.0983285	0.0586905	0.0355052	1.08371e-11	1.63881e-11	0.0983301	1	0.409721
rs6604661	1:217409199	T:0.274156	rs62026181	16:19506239	T:0.335456	17977	6669	5	1	0.0983301	3.42085e-05	-0.115354	0.0278399	1.78618e-05	-0.115535	0.0269308	2.77401e-05	-0.156169	0.0372606	1.15606e-05	-0.150842	0.034394	0.0981057	0.0666535	0.0402958	1.85874e-08	2.40176e-08	0.0983301	1	0.409721
rs2972152	2:227066574	A:0.280578	rs2521793	16:19511391	C:0.339401	17799	6607	5	1	0.0985709	1.67807e-06	-0.13363	0.0279049	3.84404e-05	-0.111375	0.0270547	3.24766e-06	-0.175213	0.0376439	2.11013e-05	-0.146602	0.034471	0.0984656	0.0662542	0.0400972	1.844e-09	2.52045e-09	0.0985709	1	0.410422
rs7918599	10:114777396	C:0.449764	rs10787472	10:114781297	A:0.452259	18035	6689	5	1	0.0989332	0.121053	-0.32882	0.212092	0.363757	0.19193	0.211324	0.264577	-0.243503	0.218264	0.299767	0.219793	0.211965	0.0989498	-0.0583347	0.0353551	3.86697e-07	4.62671e-07	0.0989332	1	0.411629
rs1502364	1:217392174	G:0.274134	rs1875574	1:217403246	G:0.274328	18004	6675	5	1	0.0990544	0.363697	-0.968541	1.06627	0.423694	0.85291	1.0661	0.316032	-1.06921	1.06639	0.429375	0.841227	1.06449	0.0986718	0.0711496	0.0430863	0.000114582	0.000112073	0.0990544	1	0.411831
chr10:114772253:i	10:114772253	C:0.4492	rs12265291	10:114810240	T:0.449589	17992	6669	5	1	0.0995405	0.828092	0.0181439	0.0835546	0.0506194	-0.163485	0.0836373	0.412428	0.0736517	0.0898599	0.239343	-0.106276	0.0903221	0.0995362	-0.0582422	0.0353603	1.00679e-07	1.25705e-07	0.0995405	1	0.41345
rs10860059	12:97046476	G:0.258904	rs4646591	15:58303002	G:0.475181	17970	6659	5	1	0.0996624	2.48019e-05	-0.121649	0.02885	1.62558e-06	0.186236	0.0388384	5.74367e-05	-0.175075	0.0435175	0.000264652	0.156369	0.0428684	0.0998881	0.0501747	0.030494	1.01637e-09	1.41967e-09	0.0996624	1	0.41345
rs6604661	1:217409199	T:0.274385	rs2856611	16:19507199	G:0.338158	17962	6662	5	1	0.0996624	3.83227e-05	-0.114624	0.0278392	1.13743e-05	-0.118321	0.0269571	3.10956e-05	-0.155383	0.0373043	8.23465e-06	-0.15353	0.0344315	0.0994859	0.0661524	0.0401568	1.32709e-08	1.74728e-08	0.0996624	1	0.41345
rs7918599	10:114777396	C:0.449801	rs1555944	14:68625118	G:0.322781	17879	6650	5	1	0.0997845	2.06532e-07	-0.13405	0.0258117	0.000181072	0.114047	0.0304607	2.89311e-07	-0.166216	0.032399	0.132876	0.0644094	0.042858	0.0998146	0.0575462	0.0349665	1.4673e-09	2.03508e-09	0.0997845	1	0.413653
rs10195178	2:227199263	T:0.427808	rs12258200	10:114781698	T:0.449482	18063	6706	5	1	0.100029	1.73967e-06	0.119773	0.0250491	6.58403e-08	-0.138965	0.0257239	1.74954e-05	0.170335	0.0396621	0.0255102	-0.0889243	0.0398123	0.10004	-0.0559057	0.0339923	4.43452e-12	6.90581e-12	0.100029	1	0.414365
rs2308953	5:34909062	C:0.0841012	rs8011527	14:68638685	A:0.321243	17907	6637	5	1	0.100275	2.48376e-09	0.746174	0.125144	0.00035082	0.109522	0.0306393	9.11738e-10	0.773759	0.126346	9.10818e-05	0.126495	0.0323252	0.100686	-0.0789014	0.0480656	3.70935e-11	5.56757e-11	0.100275	1	0.415078
rs10195178	2:227199263	T:0.427761	rs11196191	10:114780633	A:0.449377	18065	6707	5	1	0.100397	1.58197e-06	0.120256	0.0250502	6.47969e-08	-0.139033	0.0257229	1.66797e-05	0.170737	0.0396578	0.0252632	-0.0890678	0.0398094	0.100517	-0.055824	0.0339903	4.00235e-12	6.262e-12	0.100397	1	0.415284
rs3821757	3:10948564	G:0.485289	rs7899529	10:114779538	G:0.452998	17946	6630	5	1	0.100644	2.91056e-06	-0.149559	0.0319774	3.30536e-07	-0.131275	0.0257142	0.0045056	-0.111848	0.0393775	0.0106956	-0.0908494	0.0355925	0.100686	-0.0446209	0.0271824	3.3544e-11	5.05892e-11	0.100644	1	0.415506
[truncated: 4,299 more rows]

## Sheet: B) Dominant
Var1_ID	Var1_Pos	Var1_MAF	Var2_ID	Var2_Pos	Var2_MAF	Num_NonMissing	Num_Cases	N_Iter	Converged	Raw_LRT_pval	Red_Var1_Pval	Red_Var1_beta	Red_Var1_SE	Red_Var2_Pval	Red_Var2_beta	Red_Var2_SE	Full_Var1_Pval	Full_Var1_beta	Full_Var1_SE	Full_Var2_Pval	Full_Var2_beta	Full_Var2_SE	Full_Var1_Var2_Pval	Full_Var1_Var2_beta	Full_Var1_Var2_SE	Red_Model_Pval	Full_Model_Pval	Overall_Pval_(LRT)	Overall_Pval_adj_Bonferroni	Overall_Pval_adj_FDR
[truncated: 5,671 more rows]

[truncated: 3 more sheets: C) Recessive, D) Codominant, E) EDGE]
